# Supplementary material for: High-Throughput Proteomics Identifies Proteins With Importance to Postantibiotic Recovery in Depolarized Persister Cells
Source: Front Microbiol. 2019 Mar 6;10:378. doi: 10.3389/fmicb.2019.00378 (PMC6414554; doi:10.3389/fmicb.2019.00378)
Supplement: Supplementary file 3 [file Table_3.XLSX]

## Sheet: pulsed-SILAC
Supplementary Table 3. Mass spectrometry data for pulsed-SILAC and label-free quantification.
Fasta headers	Uniprot ID	Protein names	Gene names	Ratio H/L Lys8_biorep1	Lys8 incorporation (%) Lys8_biorep1	Ratio H/L Lys8_biorep2	Lys8 incorporation (%) Lys8_biorep2	Ratio H/L Lys8_biorep3	Lys8 incorporation (%) Lys8_biorep3	Ratio H/L Lys8_Ctrl	Lys8 incorporation (%) Lys8_Ctrl		Peptides Lys8_biorep1	Peptides Lys8_biorep2	Peptides Lys8_biorep3	Peptides Lys8_Ctrl	Unique peptides Lys8_biorep1	Unique peptides Lys8_biorep2	Unique peptides Lys8_biorep3	Unique peptides Lys8_Ctrl	Sequence coverage [%]	Mol. weight [kDa]	Intensity Lys8_biorep1	Intensity L Lys8_biorep1	Intensity H Lys8_biorep1	Intensity Lys8_biorep2	Intensity L Lys8_biorep2	Intensity H Lys8_biorep2	Intensity Lys8_biorep3	Intensity L Lys8_biorep3	Intensity H Lys8_biorep3	Intensity Lys8_Ctrl	Intensity L Lys8_Ctrl	Intensity H Lys8_Ctrl
sp|B1XBC4|ARGB_ECODH Acetylglutamate kinase OS=Escherichia coli (strain K12 / DH10B) OX=316385 GN=argB PE=3 SV=1;sp|P0A6C8|ARGB_ECOLI Acetylglutamate kinase OS=Escherichia coli (strain K12) OX=83333 GN=argB PE=1 SV=1;sp|C5A0Q8|ARGB_ECOBW Acetylglutamate ki	B1XBC4	Acetylglutamate kinase	argB	0.51431	33.9633	0.62312	38.3903	0.66688	40.0077	1.3467	57.387		9	9	8	9	9	9	8	9	43.2	27.028	3823300000	2448300000	1375000000	3110800000	1796100000	1314700000	3775500000	2068400000	1707200000	1893900000	767270000	1126600000
sp|C4ZR77|RS6_ECOBW 30S ribosomal protein S6 OS=Escherichia coli (strain K12 / MC4100 / BW2952) OX=595496 GN=rpsF PE=3 SV=1;sp|B1XDV1|RS6_ECODH 30S ribosomal protein S6 OS=Escherichia coli (strain K12 / DH10B) OX=316385 GN=rpsF PE=3 SV=1	C4ZR77	30S ribosomal protein S6	rpsF	0.45585	31.3116	0.51646	34.0569	0.52189	34.2922	2.3215	69.8931		9	7	10	9	1	1	1	1	84.7	15.187	10820000000	7335700000	3484800000	12318000000	7984700000	4332900000	16419000000	10641000000	5777300000	14611000000	4408000000	10203000000
sp|C5A0R2|FABR_ECOBW HTH-type transcriptional repressor FabR OS=Escherichia coli (strain K12 / MC4100 / BW2952) OX=595496 GN=fabR PE=3 SV=1;sp|B1XBX4|FABR_ECODH HTH-type transcriptional repressor FabR OS=Escherichia coli (strain K12 / DH10B) OX=316385 GN=f	C5A0R2	HTH-type transcriptional repressor FabR	fabR												2		0	0	2	0	11.6	24.446	0	0	0	0	0	0	63181000	63181000	0	0	0	0
sp|P00350|6PGD_ECOLI 6-phosphogluconate dehydrogenase, decarboxylating OS=Escherichia coli (strain K12) OX=83333 GN=gnd PE=1 SV=2	P00350	6-phosphogluconate dehydrogenase, decarboxylating	gnd	0.47982	32.4242	0.51305	33.9083	0.49455	33.0902	2.6425	72.5463		27	26	27	30	27	26	27	30	76.9	51.481	13628000000	9157900000	4470200000	19079000000	12359000000	6720000000	18064000000	12055000000	6008600000	35594000000	7863400000	27731000000
sp|P00363|FRDA_ECOLI Fumarate reductase flavoprotein subunit OS=Escherichia coli (strain K12) OX=83333 GN=frdA PE=1 SV=3	P00363	Fumarate reductase flavoprotein subunit	frdA			0.61728	38.1678						6	6	3	2	6	6	3	2	19.8	65.971	222920000	110890000	112020000	360510000	238060000	122460000	205000000	159800000	45200000	19171000	0	19171000
sp|P00370|DHE4_ECOLI NADP-specific glutamate dehydrogenase OS=Escherichia coli (strain K12) OX=83333 GN=gdhA PE=1 SV=1	P00370	NADP-specific glutamate dehydrogenase	gdhA	0.37413	27.2267	0.40706	28.9298	0.4138	29.2686	2.7032	72.9963		19	20	18	19	19	20	18	19	57.7	48.581	8232700000	6309300000	1923400000	9549200000	7190200000	2358900000	9597800000	7294300000	2303400000	12769000000	3492200000	9277000000
sp|P00393|DHNA_ECOLI NADH dehydrogenase OS=Escherichia coli (strain K12) OX=83333 GN=ndh PE=1 SV=2	P00393	NADH dehydrogenase	ndh	0.39423	28.2758	0.42452	29.8009	0.42655	29.9008	2.9398	74.618		15	13	15	11	15	13	15	11	59.7	47.358	6849000000	4661500000	2187400000	8254100000	5559700000	2694400000	8083600000	5413800000	2669700000	3896700000	922650000	2974000000
sp|P00448|SODM_ECOLI Superoxide dismutase [Mn] OS=Escherichia coli (strain K12) OX=83333 GN=sodA PE=1 SV=2	P00448	Superoxide dismutase [Mn]	sodA	0.30148	23.1644	0.35281	26.0798	0.33954	25.3475	2.2547	69.2752		12	10	13	16	12	10	13	16	87.9	23.097	16517000000	12955000000	3562000000	9707200000	7225000000	2482200000	15755000000	11866000000	3889500000	29104000000	8619800000	20485000000
sp|P00452|RIR1_ECOLI Ribonucleoside-diphosphate reductase 1 subunit alpha OS=Escherichia coli (strain K12) OX=83333 GN=nrdA PE=1 SV=2;sp|P00452-2|RIR1_ECOLI Isoform Alpha of Ribonucleoside-diphosphate reductase 1 subunit alpha OS=Escherichia coli (strain	P00452	Ribonucleoside-diphosphate reductase 1 subunit alpha	nrdA	0.51082	33.8108	0.52487	34.4206	0.51431	33.9633	2.587	72.1216		32	26	28	24	32	26	28	24	55.1	85.774	13774000000	8750700000	5022900000	8902900000	6079800000	2823100000	11463000000	7645700000	3817000000	4435700000	1191700000	3244000000
sp|P00490|PHSM_ECOLI Maltodextrin phosphorylase OS=Escherichia coli (strain K12) OX=83333 GN=malP PE=1 SV=7	P00490	Maltodextrin phosphorylase	malP	0.49124	32.9417	0.50556	33.5795	0.48673	32.7383	2.2549	69.2771		35	37	38	17	35	37	38	17	60.2	90.521	16044000000	10805000000	5238600000	14497000000	9763800000	4732900000	15646000000	10517000000	5128900000	3940300000	1231500000	2708800000
sp|P00509|AAT_ECOLI Aspartate aminotransferase OS=Escherichia coli (strain K12) OX=83333 GN=aspC PE=1 SV=1	P00509	Aspartate aminotransferase	aspC	0.44484	30.7882	0.45992	31.5031	0.46302	31.6482	2.7959	73.6558		26	27	26	33	26	27	26	33	75.3	43.573	7642800000	5317400000	2325400000	8358000000	5474900000	2883100000	9068500000	5957900000	3110700000	19576000000	4711200000	14864000000
sp|P00547|KHSE_ECOLI Homoserine kinase OS=Escherichia coli (strain K12) OX=83333 GN=thrB PE=1 SV=2;sp|C4ZPT0|KHSE_ECOBW Homoserine kinase OS=Escherichia coli (strain K12 / MC4100 / BW2952) OX=595496 GN=thrB PE=3 SV=1;sp|B1XBC8|KHSE_ECODH Homoserine kinase	P00547	Homoserine kinase	thrB			0.4347	30.299	0.42964	30.0523	2.0152	66.8347		8	9	10	8	8	9	10	8	40.6	33.623	625640000	503440000	122200000	503080000	344060000	159020000	764580000	584200000	180380000	771310000	249770000	521540000
sp|P00550|PTM3C_ECOLI PTS system mannitol-specific EIICBA component OS=Escherichia coli (strain K12) OX=83333 GN=mtlA PE=1 SV=1	P00550	PTS system mannitol-specific EIICBA component;Mannitol permease IIC component;Mannitol-specific phosphotransferase enzyme IIB component;Mannitol-specific phosphotransferase enzyme IIA component	mtlA	0.54414	35.239	0.50592	33.5954	0.51775	34.113	2.8706	74.1642		18	20	18	11	18	20	18	11	47.6	67.971	4395300000	2978200000	1417100000	3188300000	2199200000	989110000	3148200000	2189800000	958450000	1187400000	312120000	875240000
sp|P00561|AK1H_ECOLI Bifunctional aspartokinase/homoserine dehydrogenase 1 OS=Escherichia coli (strain K12) OX=83333 GN=thrA PE=1 SV=2	P00561	Bifunctional aspartokinase/homoserine dehydrogenase 1;Aspartokinase;Homoserine dehydrogenase	thrA	0.39557	28.3447	0.49261	33.0033	0.49971	33.3204	2.1508	68.262		47	48	50	44	47	48	50	44	76.8	89.119	77541000000	56092000000	21448000000	65945000000	46629000000	19316000000	63501000000	42951000000	20550000000	30258000000	9978200000	20279000000
sp|P00562|AK2H_ECOLI Bifunctional aspartokinase/homoserine dehydrogenase 2 OS=Escherichia coli (strain K12) OX=83333 GN=metL PE=1 SV=3	P00562	Bifunctional aspartokinase/homoserine dehydrogenase 2;Aspartokinase;Homoserine dehydrogenase	metL	0.57761	36.613	0.62424	38.4327	0.65699	39.6496	1.9634	66.255		28	24	25	19	28	24	25	19	48.3	88.887	2438400000	1406400000	1032000000	1950900000	1112700000	838260000	2237000000	1263100000	973940000	710320000	163610000	546710000
sp|P00579|RPOD_ECOLI RNA polymerase sigma factor RpoD OS=Escherichia coli (strain K12) OX=83333 GN=rpoD PE=1 SV=2	P00579	RNA polymerase sigma factor RpoD	rpoD	0.74347	42.6431	0.78144	43.8656	0.8419	45.7082	3.3654	77.0926		14	14	16	12	14	14	16	12	33.1	70.263	5049800000	2875400000	2174400000	3702200000	1767700000	1934500000	5342800000	2726900000	2615800000	2006400000	553830000	1452500000
sp|P00582|DPO1_ECOLI DNA polymerase I OS=Escherichia coli (strain K12) OX=83333 GN=polA PE=1 SV=1	P00582	DNA polymerase I	polA	0.4255	29.8492	0.44351	30.7244	0.40143	28.6443	2.7244	73.15		26	21	22	32	26	21	22	32	49.6	103.12	3307000000	2383600000	923370000	2504200000	1758600000	745630000	2149200000	1529300000	619860000	4278600000	1117000000	3161500000
sp|P00803|LEP_ECOLI Signal peptidase I OS=Escherichia coli (strain K12) OX=83333 GN=lepB PE=1 SV=2	P00803	Signal peptidase I	lepB	0.42859	30.0009	0.45262	31.1589	0.46797	31.8787	3.0224	75.1392		8	8	13	4	8	8	13	4	50.6	35.96	891590000	623180000	268410000	1210300000	826740000	383540000	1724100000	1113700000	610420000	291300000	68551000	222750000
sp|P00805|ASPG2_ECOLI L-asparaginase 2 OS=Escherichia coli (strain K12) OX=83333 GN=ansB PE=1 SV=2	P00805	L-asparaginase 2	ansB	0.44941	31.0064	0.46341	31.6665	0.40521	28.8363				3	3	2	2	3	3	2	2	22.1	36.85	1523200000	847290000	675920000	219680000	158590000	61089000	80736000	52504000	28232000	64048000	0	64048000
sp|P00811|AMPC_ECOLI Beta-lactamase OS=Escherichia coli (strain K12) OX=83333 GN=ampC PE=1 SV=1	P00811	Beta-lactamase	ampC													3	0	0	0	3	11.1	41.555	0	0	0	0	0	0	0	0	0	39807000	0	39807000
sp|P00861|DCDA_ECOLI Diaminopimelate decarboxylase OS=Escherichia coli (strain K12) OX=83333 GN=lysA PE=1 SV=1	P00861	Diaminopimelate decarboxylase	lysA										2	2		3	2	2	0	3	20	46.177	0	0	0	210410000	102220000	108190000	0	0	0	0	0	0
sp|P00864|CAPP_ECOLI Phosphoenolpyruvate carboxylase OS=Escherichia coli (strain K12) OX=83333 GN=ppc PE=1 SV=1;sp|C5A0C2|CAPP_ECOBW Phosphoenolpyruvate carboxylase OS=Escherichia coli (strain K12 / MC4100 / BW2952) OX=595496 GN=ppc PE=3 SV=1;sp|B1XBC1|CAP	P00864	Phosphoenolpyruvate carboxylase	ppc	0.35373	26.13	0.37884	27.4753	0.40557	28.8545	2.3868	70.4736		46	51	51	52	46	51	51	52	67.8	99.061	14786000000	10670000000	4115900000	12951000000	9620400000	3330100000	13976000000	10349000000	3626900000	13443000000	3647100000	9796200000
sp|P00887|AROH_ECOLI Phospho-2-dehydro-3-deoxyheptonate aldolase, Trp-sensitive OS=Escherichia coli (strain K12) OX=83333 GN=aroH PE=1 SV=4	P00887	Phospho-2-dehydro-3-deoxyheptonate aldolase, Trp-sensitive	aroH	0.37708	27.3826	0.40519	28.8352	0.43386	30.2582	2.6803	72.8283		14	12	13	10	14	12	13	10	57.8	38.735	1106200000	831550000	274690000	910260000	675720000	234550000	988030000	734470000	253560000	397090000	131240000	265850000
sp|P00888|AROF_ECOLI Phospho-2-dehydro-3-deoxyheptonate aldolase, Tyr-sensitive OS=Escherichia coli (strain K12) OX=83333 GN=aroF PE=1 SV=1	P00888	Phospho-2-dehydro-3-deoxyheptonate aldolase, Tyr-sensitive	aroF	0.15047	13.079	0.12866	11.3994	0.10589	9.57509	3.9695	79.8773		18	17	19	19	17	16	18	18	80.6	38.804	6991700000	6116900000	874790000	5988600000	5309300000	679250000	7455600000	6747400000	708170000	6158800000	1076200000	5082600000
sp|P00893|ILVI_ECOLI Acetolactate synthase isozyme 3 large subunit OS=Escherichia coli (strain K12) OX=83333 GN=ilvI PE=1 SV=2	P00893	Acetolactate synthase isozyme 3 large subunit	ilvI	0.37712	27.3847	0.40019	28.5811	0.40101	28.6229	2.8112	73.7615		20	19	19	18	20	19	19	18	57.1	62.984	12276000000	9076400000	3199800000	8372400000	6320600000	2051700000	9718200000	7368900000	2349300000	4438100000	1187900000	3250300000
sp|P00894|ILVH_ECOLI Acetolactate synthase isozyme 3 small subunit OS=Escherichia coli (strain K12) OX=83333 GN=ilvH PE=1 SV=3	P00894	Acetolactate synthase isozyme 3 small subunit	ilvH	0.34049	25.4004	0.35284	26.0814	0.36276	26.6195	2.6638	72.7059		9	11	8	10	9	11	8	10	79.8	17.977	2980900000	2254000000	726940000	1938400000	1490900000	447440000	2450500000	1803900000	646670000	1425700000	321930000	1103700000
sp|P00895|TRPE_ECOLI Anthranilate synthase component 1 OS=Escherichia coli (strain K12) OX=83333 GN=trpE PE=1 SV=2	P00895	Anthranilate synthase component 1	trpE	0.29109	22.5461	0.29988	23.0698	0.29551	22.8103	2.9044	74.3879		19	17	21	14	19	17	21	14	58.1	57.494	2256800000	1708700000	548150000	1667600000	1402700000	264810000	1776600000	1408300000	368300000	746250000	202360000	543890000
sp|P00904|TRPGD_ECOLI Bifunctional protein TrpGD OS=Escherichia coli (strain K12) OX=83333 GN=trpGD PE=1 SV=3	P00904	Bifunctional protein TrpGD;Anthranilate synthase component 2;Anthranilate phosphoribosyltransferase	trpGD	0.28489	22.1723	0.31569	23.9943	0.288	22.3602	2.8659	74.1328		14	14	16	11	14	14	16	11	65.7	56.869	3307400000	2696400000	610990000	2158100000	1796800000	361250000	1954300000	1649800000	304510000	1443900000	430760000	1013100000
sp|P00909|TRPC_ECOLI Tryptophan biosynthesis protein TrpCF OS=Escherichia coli (strain K12) OX=83333 GN=trpC PE=1 SV=4	P00909	Tryptophan biosynthesis protein TrpCF;Indole-3-glycerol phosphate synthase;N-(5-phospho-ribosyl)anthranilate isomerase	trpC			0.36045	26.4949	0.31202	23.7816	2.6996	72.9701		8	8	12	17	8	8	12	17	44.6	49.492	101140000	76204000	24939000	368550000	246780000	121770000	429610000	326280000	103330000	1303300000	277340000	1025900000
sp|P00934|THRC_ECOLI Threonine synthase OS=Escherichia coli (strain K12) OX=83333 GN=thrC PE=1 SV=1	P00934	Threonine synthase	thrC	0.3683	26.9166	0.42526	29.8374	0.43836	30.4764	1.9029	65.5517		24	26	26	25	24	26	26	25	80.4	47.113	9177900000	6998100000	2179800000	7880100000	5602500000	2277600000	9007800000	6435600000	2572200000	16273000000	5701700000	10572000000
sp|P00935|METB_ECOLI Cystathionine gamma-synthase OS=Escherichia coli (strain K12) OX=83333 GN=metB PE=1 SV=1	P00935	Cystathionine gamma-synthase	metB			0.90604	47.5352	1.0214	50.5293	2.4875	71.3262		8	10	9	7	8	10	9	7	41.5	41.55	235580000	188280000	47299000	1202600000	632410000	570200000	719700000	360060000	359640000	372670000	103750000	268920000
sp|P00936|CYAA_ECOLI Adenylate cyclase OS=Escherichia coli (strain K12) OX=83333 GN=cyaA PE=1 SV=5	P00936	Adenylate cyclase	cyaA	0.63169	38.7138								5	2			5	2	0	1	11.6	97.585	280620000	183570000	97052000	0	0	0	0	0	0	0	0	0
sp|P00946|MANA_ECOLI Mannose-6-phosphate isomerase OS=Escherichia coli (strain K12) OX=83333 GN=manA PE=1 SV=1	P00946	Mannose-6-phosphate isomerase	manA	0.72128	41.9037	0.75546	43.0349	0.71273	41.6137	2.7722	73.4903		11	11	10	12	11	11	10	12	51.7	42.849	1412800000	848530000	564260000	1495900000	886100000	609810000	2189300000	1413700000	775570000	4029300000	623660000	3405700000
sp|P00954|SYW_ECOLI Tryptophan--tRNA ligase OS=Escherichia coli (strain K12) OX=83333 GN=trpS PE=1 SV=3	P00954	Tryptophan--tRNA ligase	trpS	0.37878	27.4721	0.45016	31.0421	0.44858	30.9669	2.5304	71.6746		11	10	10	15	11	10	10	15	66.5	37.437	8381400000	5829400000	2551900000	7842600000	5365400000	2477300000	9064100000	6096300000	2967800000	12733000000	3368100000	9364800000
sp|P00956|SYI_ECOLI Isoleucine--tRNA ligase OS=Escherichia coli (strain K12) OX=83333 GN=ileS PE=1 SV=5;sp|C4ZPV2|SYI_ECOBW Isoleucine--tRNA ligase OS=Escherichia coli (strain K12 / MC4100 / BW2952) OX=595496 GN=ileS PE=3 SV=1;sp|B1XBF1|SYI_ECODH Isoleucin	P00956	Isoleucine--tRNA ligase	ileS	0.43902	30.5083	0.52077	34.2438	0.52671	34.4997	1.8487	64.8963		31	30	36	37	31	30	36	37	61.6	104.3	5731300000	4125400000	1605900000	6234700000	4186500000	2048200000	8019400000	5435600000	2583900000	7762100000	2501600000	5260500000
sp|P00957|SYA_ECOLI Alanine--tRNA ligase OS=Escherichia coli (strain K12) OX=83333 GN=alaS PE=1 SV=2;sp|B1XCM5|SYA_ECODH Alanine--tRNA ligase OS=Escherichia coli (strain K12 / DH10B) OX=316385 GN=alaS PE=3 SV=1	P00957	Alanine--tRNA ligase	alaS	0.35009	25.9309	0.39467	28.2985	0.39824	28.4815	2.4463	70.9834		47	45	48	43	47	45	48	43	67.2	96.031	19863000000	14451000000	5412100000	15349000000	10780000000	4568800000	17500000000	12251000000	5249300000	12669000000	3463200000	9206200000
sp|P00959|SYM_ECOLI Methionine--tRNA ligase OS=Escherichia coli (strain K12) OX=83333 GN=metG PE=1 SV=2;sp|C4ZSJ8|SYM_ECOBW Methionine--tRNA ligase OS=Escherichia coli (strain K12 / MC4100 / BW2952) OX=595496 GN=metG PE=3 SV=1;sp|B1X7K4|SYM_ECODH Methionin	P00959	Methionine--tRNA ligase	metG	0.38529	27.8129	0.41185	29.1709	0.43444	30.2864	2.5001	71.4294		30	22	26	25	30	22	26	25	55.2	76.254	9229700000	6858100000	2371600000	6235000000	4260000000	1975000000	5386800000	3746200000	1640600000	7670800000	2051800000	5619100000
sp|P00960|SYGA_ECOLI Glycine--tRNA ligase alpha subunit OS=Escherichia coli (strain K12) OX=83333 GN=glyQ PE=1 SV=2	P00960	Glycine--tRNA ligase alpha subunit	glyQ	0.48255	32.5486	0.48333	32.5841	0.4768	32.286				12	11	8		2	2	1	0	54.5	34.774	3124500000	2134000000	990540000	2592700000	1741200000	851490000	2485900000	1632700000	853210000	1052900000	298140000	754750000
sp|P00961|SYGB_ECOLI Glycine--tRNA ligase beta subunit OS=Escherichia coli (strain K12) OX=83333 GN=glyS PE=1 SV=4;sp|C4ZXE9|SYGB_ECOBW Glycine--tRNA ligase beta subunit OS=Escherichia coli (strain K12 / MC4100 / BW2952) OX=595496 GN=glyS PE=3 SV=1;sp|B1X8	P00961	Glycine--tRNA ligase beta subunit	glyS	0.4298	30.0601	0.45074	31.0697	0.45284	31.1693	2.5813	72.0772		53	48	50	43	53	48	50	43	84.5	76.812	38525000000	26558000000	11967000000	28562000000	19558000000	9004100000	33671000000	22925000000	10746000000	13756000000	3629800000	10126000000
sp|P00962|SYQ_ECOLI Glutamine--tRNA ligase OS=Escherichia coli (strain K12) OX=83333 GN=glnS PE=1 SV=3;sp|C4ZWF6|SYQ_ECOBW Glutamine--tRNA ligase OS=Escherichia coli (strain K12 / MC4100 / BW2952) OX=595496 GN=glnS PE=3 SV=1;sp|B1X6L3|SYQ_ECODH Glutamine--	P00962	Glutamine--tRNA ligase	glnS	0.44914	30.9936	0.47059	32.0001	0.46918	31.9348	2.4916	71.3598		15	13	14	26	15	13	14	26	63.4	63.477	1811700000	1448300000	363340000	2056900000	1484500000	572370000	1707000000	1381400000	325630000	5759600000	1375600000	4384000000
sp|P00963|ASNA_ECOLI Aspartate--ammonia ligase OS=Escherichia coli (strain K12) OX=83333 GN=asnA PE=1 SV=1;sp|C4ZZ22|ASNA_ECOBW Aspartate--ammonia ligase OS=Escherichia coli (strain K12 / MC4100 / BW2952) OX=595496 GN=asnA PE=3 SV=1;sp|B1X9X2|ASNA_ECODH As	P00963	Aspartate--ammonia ligase	asnA	0.72391	41.9923	0.90918	47.6215	0.9575	48.9144	0.8711	46.5555		11	10	10	6	11	10	10	6	45.5	36.65	6046000000	3990200000	2055700000	5223500000	2706400000	2517100000	8557300000	4366400000	4190800000	912410000	429370000	483040000
sp|P00968|CARB_ECOLI Carbamoyl-phosphate synthase large chain OS=Escherichia coli (strain K12) OX=83333 GN=carB PE=1 SV=2	P00968	Carbamoyl-phosphate synthase large chain	carB	0.62927	38.6228	0.75407	42.9897	0.75397	42.9865	1.8218	64.5616		58	52	52	50	58	52	52	50	55.9	117.84	57905000000	35366000000	22539000000	43399000000	24329000000	19070000000	41351000000	22464000000	18887000000	17921000000	5317800000	12603000000
sp|P02358|RS6_ECOLI 30S ribosomal protein S6 OS=Escherichia coli (strain K12) OX=83333 GN=rpsF PE=1 SV=1	P02358	30S ribosomal protein S6;30S ribosomal protein S6, fully modified isoform;30S ribosomal protein S6, non-modified isoform	rpsF													9	0	0	0	1	85.2	15.703	0	0	0	0	0	0	0	0	0	0	0	0
sp|P02359|RS7_ECOLI 30S ribosomal protein S7 OS=Escherichia coli (strain K12) OX=83333 GN=rpsG PE=1 SV=3;sp|C4ZUJ6|RS7_ECOBW 30S ribosomal protein S7 OS=Escherichia coli (strain K12 / MC4100 / BW2952) OX=595496 GN=rpsG PE=3 SV=1;sp|B1X6J1|RS7_ECODH 30S rib	P02359	30S ribosomal protein S7	rpsG	0.42955	30.0479	0.52585	34.4628	0.52519	34.4344	2.2686	69.4059		12	14	14	14	12	14	14	14	70.4	20.019	39533000000	26839000000	12694000000	36176000000	23087000000	13089000000	37860000000	24321000000	13539000000	31283000000	8853700000	22430000000
sp|P02413|RL15_ECOLI 50S ribosomal protein L15 OS=Escherichia coli (strain K12) OX=83333 GN=rplO PE=1 SV=1;sp|C4ZUF6|RL15_ECOBW 50S ribosomal protein L15 OS=Escherichia coli (strain K12 / MC4100 / BW2952) OX=595496 GN=rplO PE=3 SV=1;sp|B1X6F3|RL15_ECODH 50	P02413	50S ribosomal protein L15	rplO	0.45557	31.2984	0.48552	32.6835	0.52367	34.369	2.3011	69.7071		16	16	15	17	16	16	15	17	85.4	14.98	19967000000	14152000000	5814300000	24164000000	15924000000	8240500000	23676000000	15323000000	8352500000	21077000000	5436900000	15640000000
sp|P02918|PBPA_ECOLI Penicillin-binding protein 1A OS=Escherichia coli (strain K12) OX=83333 GN=mrcA PE=1 SV=1	P02918	Penicillin-binding protein 1A;Penicillin-insensitive transglycosylase;Penicillin-sensitive transpeptidase	mrcA	0.39534	28.3329	0.43805	30.4614	0.44264	30.6826				17	16	16	7	17	16	16	7	41.2	93.635	1016600000	760380000	256260000	997160000	660320000	336840000	1061100000	763490000	297630000	70078000	0	70078000
sp|P02919-2|PBPB_ECOLI Isoform Gamma of Penicillin-binding protein 1B OS=Escherichia coli (strain K12) OX=83333 GN=mrcB;sp|P02919|PBPB_ECOLI Penicillin-binding protein 1B OS=Escherichia coli (strain K12) OX=83333 GN=mrcB PE=1 SV=2	P02919	Penicillin-binding protein 1B;Penicillin-insensitive transglycosylase;Penicillin-sensitive transpeptidase	mrcB	0.57742	36.6053	0.71898	41.826	0.67445	40.2789	3.0285	75.1769		20	20	23	14	20	20	23	14	42.2	88.889	2234500000	1457700000	776790000	2440100000	1649000000	791080000	1610300000	1024100000	586200000	846650000	207220000	639440000
sp|P02925|RBSB_ECOLI Ribose import binding protein RbsB OS=Escherichia coli (strain K12) OX=83333 GN=rbsB PE=1 SV=1	P02925	D-ribose-binding periplasmic protein	rbsB	0.57972	36.6976	0.59219	37.1934	0.58346	36.8472	2.4198	70.7585		8	12	10	12	8	12	10	12	65.2	30.95	2846800000	1865900000	980990000	3308400000	2232600000	1075900000	2831100000	1851100000	980010000	3896400000	1332700000	2563600000
sp|P02929|TONB_ECOLI Protein TonB OS=Escherichia coli (strain K12) OX=83333 GN=tonB PE=1 SV=2	P02929	Protein TonB	tonB	0.10561	9.55219	0.13091	11.5756	0.13675	12.0299	3.6779	78.6229		5	6	6	5	5	6	6	5	34.7	26.094	1512300000	1455800000	56482000	2147400000	1993600000	153760000	2170300000	2030500000	139760000	388710000	52411000	336300000
sp|P02930|TOLC_ECOLI Outer membrane protein TolC OS=Escherichia coli (strain K12) OX=83333 GN=tolC PE=1 SV=3	P02930	Outer membrane protein TolC	tolC	0.35999	26.47	0.37933	27.501	0.37377	27.2076	2.606	72.2684		31	33	34	28	31	33	34	28	86.4	53.74	32765000000	23744000000	9020300000	35420000000	24695000000	10725000000	35445000000	24911000000	10534000000	10051000000	2864300000	7187100000
sp|P02931|OMPF_ECOLI Outer membrane protein F OS=Escherichia coli (strain K12) OX=83333 GN=ompF PE=1 SV=1	P02931	Outer membrane protein F	ompF	0.30806	23.5509	0.32416	24.4804	0.34927	25.8858	1.6518	62.2898		17	21	20	17	15	19	18	15	73.8	39.333	41125000000	32330000000	8794800000	40393000000	31450000000	8943500000	55499000000	40881000000	14618000000	14424000000	5428900000	8994900000
sp|P02943|LAMB_ECOLI Maltoporin OS=Escherichia coli (strain K12) OX=83333 GN=lamB PE=1 SV=1;sp|C5A130|LAMB_ECOBW Maltoporin OS=Escherichia coli (strain K12 / MC4100 / BW2952) OX=595496 GN=lamB PE=3 SV=1;sp|B1XC35|LAMB_ECODH Maltoporin OS=Escherichia coli (	P02943	Maltoporin	lamB	0.21825	17.915	0.21719	17.8436	0.19751	16.4934	1.7291	63.3579		10	7	7	3	10	7	7	3	42.8	49.912	528380000	472830000	55545000	439740000	386230000	53509000	570550000	471820000	98729000	122800000	45113000	77684000
sp|P03004|DNAA_ECOLI Chromosomal replication initiator protein DnaA OS=Escherichia coli (strain K12) OX=83333 GN=dnaA PE=1 SV=2;sp|C4ZYX9|DNAA_ECOBW Chromosomal replication initiator protein DnaA OS=Escherichia coli (strain K12 / MC4100 / BW2952) OX=595496	P03004	Chromosomal replication initiator protein DnaA	dnaA	0.51682	34.0726	0.60079	37.5308	0.61212	37.9699	2.4833	71.2916		10	9	8	5	10	9	8	5	37.7	52.55	1036800000	631220000	405590000	876350000	543660000	332690000	628880000	439080000	189800000	367750000	103410000	264340000
sp|P03007|DPO3E_ECOLI DNA polymerase III subunit epsilon OS=Escherichia coli (strain K12) OX=83333 GN=dnaQ PE=1 SV=1	P03007	DNA polymerase III subunit epsilon	dnaQ										2		2		2	1	2	0	11.1	27.099	285710000	215790000	69916000	263470000	196590000	66882000	24124000	10233000	13891000	0	0	0
sp|P03018|UVRD_ECOLI DNA helicase II OS=Escherichia coli (strain K12) OX=83333 GN=uvrD PE=1 SV=1	P03018	DNA helicase II	uvrD										5	4	3	5	5	4	3	5	21.2	81.989	0	0	0	0	0	0	0	0	0	39018000	0	39018000
sp|P03024|GALR_ECOLI HTH-type transcriptional regulator GalR OS=Escherichia coli (strain K12) OX=83333 GN=galR PE=1 SV=1	P03024	HTH-type transcriptional regulator GalR	galR										4	4	3		4	4	3	1	20.1	37.094	21617000	21617000	0	0	0	0	0	0	0	0	0	0
sp|P03813|YGEA_ECOLI Putative racemase YgeA OS=Escherichia coli (strain K12) OX=83333 GN=ygeA PE=1 SV=1	P03813	Uncharacterized protein YgeA	ygeA													2	0	0	0	2	12.6	25.248	0	0	0	0	0	0	0	0	0	78252000	11894000	66358000
sp|P03817|MIOC_ECOLI Protein MioC OS=Escherichia coli (strain K12) OX=83333 GN=mioC PE=1 SV=4	P03817	Protein MioC	mioC											2	2		1	2	2	1	22.4	15.807	138340000	87134000	51207000	157740000	106400000	51347000	158520000	99761000	58754000	437310000	112100000	325210000
sp|P03819|KEFC_ECOLI Glutathione-regulated potassium-efflux system protein KefC OS=Escherichia coli (strain K12) OX=83333 GN=kefC PE=1 SV=2;sp|C4ZPX3|KEFC_ECOBW Glutathione-regulated potassium-efflux system protein KefC OS=Escherichia coli (strain K12 / MC	P03819	Glutathione-regulated potassium-efflux system protein KefC	kefC	0.86442	46.364	0.90339	47.4622	0.56745	36.2021	2.2542	69.2705		2	3	5	3	2	3	5	3	15.3	67.795	326700000	165720000	160980000	427750000	234100000	193650000	744800000	404360000	340440000	2806900000	772810000	2034100000
sp|P03841|MALM_ECOLI Maltose operon periplasmic protein OS=Escherichia coli (strain K12) OX=83333 GN=malM PE=3 SV=1	P03841	Maltose operon periplasmic protein	malM										3	2	2		3	2	2	1	13.7	31.943	69292000	69292000	0	0	0	0	0	0	0	0	0	0
sp|P04036|DAPB_ECOLI 4-hydroxy-tetrahydrodipicolinate reductase OS=Escherichia coli (strain K12) OX=83333 GN=dapB PE=1 SV=1;sp|C4ZPV7|DAPB_ECOBW 4-hydroxy-tetrahydrodipicolinate reductase OS=Escherichia coli (strain K12 / MC4100 / BW2952) OX=595496 GN=dapB	P04036	4-hydroxy-tetrahydrodipicolinate reductase	dapB							2.4992	71.422		2	3	3	4	2	3	3	4	32.2	28.756	427290000	269880000	157410000	373170000	252800000	120370000	391560000	221880000	169680000	518250000	151540000	366710000
sp|P04079|GUAA_ECOLI GMP synthase [glutamine-hydrolyzing] OS=Escherichia coli (strain K12) OX=83333 GN=guaA PE=1 SV=1;sp|C4ZX82|GUAA_ECOBW GMP synthase [glutamine-hydrolyzing] OS=Escherichia coli (strain K12 / MC4100 / BW2952) OX=595496 GN=guaA PE=3 SV=1;s	P04079	GMP synthase [glutamine-hydrolyzing]	guaA	0.39012	28.0638	0.45747	31.388	0.44851	30.9635	2.7039	73.0014		17	19	20	24	17	19	20	24	55.4	58.679	3347800000	2482000000	865860000	5015300000	3535400000	1479900000	3973900000	2733900000	1240100000	6923900000	1639400000	5284500000
sp|P04335|FRSA_ECOLI Esterase FrsA OS=Escherichia coli (strain K12) OX=83333 GN=frsA PE=3 SV=2;sp|C4ZT96|FRSA_ECOBW Esterase FrsA OS=Escherichia coli (strain K12 / MC4100 / BW2952) OX=595496 GN=frsA PE=3 SV=1;sp|B1XDY2|FRSA_ECODH Esterase FrsA OS=Escherich	P04335	Esterase FrsA	frsA			0.52317	34.3474			3.2147	76.2735		5	8	5	13	5	8	5	13	48.6	47.008	401390000	308710000	92683000	128470000	92142000	36325000	109060000	92969000	16090000	583600000	122530000	461060000
sp|P04391|OTC1_ECOLI Ornithine carbamoyltransferase subunit I OS=Escherichia coli (strain K12) OX=83333 GN=argI PE=1 SV=3	P04391	Ornithine carbamoyltransferase chain I	argI	0.70389	41.3108	0.9022	47.4293	0.90663	47.5514	1.513	60.2069		12	12	12	9	6	6	6	4	53.6	36.907	6820700000	3568900000	3251900000	8217000000	3785000000	4432000000	6117700000	2771100000	3346500000	3638600000	1322300000	2316300000
sp|P04425|GSHB_ECOLI Glutathione synthetase OS=Escherichia coli (strain K12) OX=83333 GN=gshB PE=1 SV=1	P04425	Glutathione synthetase	gshB	0.41386	29.2716	0.45612	31.3243	0.4225	29.7012	2.3666	70.2964		7	10	9	11	7	10	9	11	43.7	35.56	696960000	474360000	222590000	644480000	437470000	207010000	1197100000	797910000	399220000	1042800000	185040000	857740000
sp|P04693|TYRB_ECOLI Aromatic-amino-acid aminotransferase OS=Escherichia coli (strain K12) OX=83333 GN=tyrB PE=1 SV=1	P04693	Aromatic-amino-acid aminotransferase	tyrB	0.3228	24.4028	0.33072	24.8527	0.3127	23.8211	2.8875	74.2765		16	16	14	18	16	16	14	18	55.9	43.537	5628500000	4182000000	1446500000	4921400000	3677200000	1244200000	4511700000	3472100000	1039500000	6272800000	1456200000	4816500000
sp|P04805|SYE_ECOLI Glutamate--tRNA ligase OS=Escherichia coli (strain K12) OX=83333 GN=gltX PE=1 SV=1;sp|B1X9R9|SYE_ECODH Glutamate--tRNA ligase OS=Escherichia coli (strain K12 / DH10B) OX=316385 GN=gltX PE=3 SV=1	P04805	Glutamate--tRNA ligase	gltX	0.54919	35.4501	0.63017	38.6567	0.63352	38.7825	1.4865	59.7828		14	12	14	13	14	12	14	13	44.4	53.815	3435800000	2201400000	1234400000	4069700000	2456800000	1612800000	3078300000	1907300000	1171000000	2867700000	1070500000	1797200000
sp|P04816|LIVK_ECOLI Leucine-specific-binding protein OS=Escherichia coli (strain K12) OX=83333 GN=livK PE=1 SV=2	P04816	Leucine-specific-binding protein	livK	0.20819	17.2316	0.23348	18.9286	0.23915	19.2995	2.0763	67.4934		16	16	16	17	15	15	15	16	72.6	39.378	9127900000	7598900000	1529000000	10453000000	8430100000	2023000000	13243000000	11012000000	2230300000	14761000000	4399700000	10362000000
sp|P04825|AMPN_ECOLI Aminopeptidase N OS=Escherichia coli (strain K12) OX=83333 GN=pepN PE=1 SV=2	P04825	Aminopeptidase N	pepN	0.57049	36.3256	0.53867	35.0088	0.55585	35.7265	2.9246	74.5197		15	15	17	26	15	15	17	26	39.2	98.918	1458600000	955590000	502980000	2058300000	1327600000	730650000	2081700000	1355400000	726280000	4178700000	967970000	3210700000
sp|P04846|NLPA_ECOLI Lipoprotein 28 OS=Escherichia coli (strain K12) OX=83333 GN=nlpA PE=1 SV=1	P04846	Lipoprotein 28	nlpA	0.49899	33.2884	0.5316	34.7088	0.52935	34.6127	2.3168	69.8505		13	12	13	11	13	12	13	11	59.2	29.423	8294300000	4932200000	3362100000	6460700000	3829900000	2630800000	7863100000	5027000000	2836000000	2683700000	460070000	2223700000
sp|P04951|KDSB_ECOLI 3-deoxy-manno-octulosonate cytidylyltransferase OS=Escherichia coli (strain K12) OX=83333 GN=kdsB PE=1 SV=2;sp|C4ZQ44|KDSB_ECOBW 3-deoxy-manno-octulosonate cytidylyltransferase OS=Escherichia coli (strain K12 / MC4100 / BW2952) OX=5954	P04951	3-deoxy-manno-octulosonate cytidylyltransferase	kdsB							2.0939	67.6783		2		3	8	2	1	3	8	47.6	27.614	190100000	135880000	54218000	0	0	0	0	0	0	470610000	74543000	396070000
sp|P04968|ILVA_ECOLI L-threonine dehydratase biosynthetic IlvA OS=Escherichia coli (strain K12) OX=83333 GN=ilvA PE=1 SV=1	P04968	L-threonine dehydratase biosynthetic IlvA	ilvA	0.54451	35.2545	0.6309	38.6842	0.64969	39.3826	1.9952	66.6132		22	14	16	8	22	14	16	8	58.2	56.195	1329100000	950730000	378350000	796040000	500400000	295640000	1206200000	756820000	449380000	328260000	81305000	246960000
sp|P04994|EX7L_ECOLI Exodeoxyribonuclease 7 large subunit OS=Escherichia coli (strain K12) OX=83333 GN=xseA PE=1 SV=2;sp|C4ZX84|EX7L_ECOBW Exodeoxyribonuclease 7 large subunit OS=Escherichia coli (strain K12 / MC4100 / BW2952) OX=595496 GN=xseA PE=3 SV=1;s	P04994	Exodeoxyribonuclease 7 large subunit	xseA										7	5	3	4	7	5	3	4	24.1	51.832	120040000	108950000	11099000	91420000	79018000	12403000	41087000	41087000	0	45357000	0	45357000
sp|P05020|PYRC_ECOLI Dihydroorotase OS=Escherichia coli (strain K12) OX=83333 GN=pyrC PE=1 SV=2;sp|C4ZS02|PYRC_ECOBW Dihydroorotase OS=Escherichia coli (strain K12 / MC4100 / BW2952) OX=595496 GN=pyrC PE=3 SV=1;sp|B1X9H5|PYRC_ECODH Dihydroorotase OS=Escher	P05020	Dihydroorotase	pyrC	0.65308	39.5069	0.78758	44.0584	0.77414	43.6347	2.3565	70.2071		10	13	13	14	10	13	13	14	56	38.827	1436800000	871810000	565010000	2142300000	1204300000	938050000	2242000000	1220300000	1021700000	3754300000	1131300000	2623100000
sp|P05042|FUMC_ECOLI Fumarate hydratase class II OS=Escherichia coli (strain K12) OX=83333 GN=fumC PE=1 SV=1	P05042	Fumarate hydratase class II	fumC	0.60996	37.8867	0.64457	39.1938	0.56976	36.296	1.8803	65.2814		6	6	6	4	6	6	6	4	16.7	50.488	441660000	242470000	199190000	464800000	304810000	159990000	491890000	387180000	104720000	300680000	150420000	150260000
sp|P05055|PNP_ECOLI Polyribonucleotide nucleotidyltransferase OS=Escherichia coli (strain K12) OX=83333 GN=pnp PE=1 SV=3;sp|C4ZSQ5|PNP_ECOBW Polyribonucleotide nucleotidyltransferase OS=Escherichia coli (strain K12 / MC4100 / BW2952) OX=595496 GN=pnp PE=3	P05055	Polyribonucleotide nucleotidyltransferase	pnp	0.38953	28.0332	0.44014	30.5623	0.44016	30.5633	2.1906	68.6579		36	36	45	42	36	36	45	42	69.1	77.1	24274000000	16943000000	7331000000	22471000000	15148000000	7323900000	29879000000	20056000000	9823100000	16174000000	5375200000	10799000000
sp|P05194|AROD_ECOLI 3-dehydroquinate dehydratase OS=Escherichia coli (strain K12) OX=83333 GN=aroD PE=1 SV=2;sp|C4ZYF5|AROD_ECOBW 3-dehydroquinate dehydratase OS=Escherichia coli (strain K12 / MC4100 / BW2952) OX=595496 GN=aroD PE=3 SV=1;sp|B1XG01|AROD_EC	P05194	3-dehydroquinate dehydratase	aroD			0.53119	34.6913			2.751	73.3404		5	7	7	10	5	7	7	10	52	27.466	100600000	100600000	0	163570000	117800000	45769000	128920000	93494000	35428000	1086300000	252280000	833990000
sp|P05458|PTRA_ECOLI Protease 3 OS=Escherichia coli (strain K12) OX=83333 GN=ptrA PE=1 SV=1	P05458	Protease 3	ptrA	0.3558	26.2428	0.39672	28.4037	0.40819	28.9869	2.8002	73.6856		11	9	7	10	11	9	7	10	30.4	107.71	388670000	300300000	88375000	504520000	406380000	98141000	292130000	232840000	59297000	232150000	37097000	195060000
sp|P05459|PDXB_ECOLI Erythronate-4-phosphate dehydrogenase OS=Escherichia coli (strain K12) OX=83333 GN=pdxB PE=2 SV=2;sp|C4ZVL3|PDXB_ECOBW Erythronate-4-phosphate dehydrogenase OS=Escherichia coli (strain K12 / MC4100 / BW2952) OX=595496 GN=pdxB PE=3 SV=1	P05459	Erythronate-4-phosphate dehydrogenase	pdxB	0.46074	31.5415	0.4979	33.2399	0.45887	31.4538	2.8207	73.8268		9	12	10	13	9	12	10	13	56.3	41.367	428050000	291400000	136640000	735890000	529040000	206850000	1073300000	800810000	272540000	2152300000	326310000	1826000000
sp|P05637|APAH_ECOLI Bis(5-nucleosyl)-tetraphosphatase [symmetrical] OS=Escherichia coli (strain K12) OX=83333 GN=apaH PE=1 SV=2;sp|C4ZPX5|APAH_ECOBW Bis(5-nucleosyl)-tetraphosphatase, symmetrical OS=Escherichia coli (strain K12 / MC4100 / BW2952) OX=595	P05637	Bis(5-nucleosyl)-tetraphosphatase [symmetrical];Bis(5-nucleosyl)-tetraphosphatase, symmetrical	apaH													3	0	0	0	3	10.4	31.296	0	0	0	0	0	0	0	0	0	111210000	33325000	77885000
sp|P05719|T1SK_ECOLI Type-1 restriction enzyme EcoKI specificity protein OS=Escherichia coli (strain K12) OX=83333 GN=hsdS PE=1 SV=1	P05719	Type-1 restriction enzyme EcoKI specificity protein	hsdS			0.32884	24.7464			2.6912	72.9085		6	5	2	5	6	5	2	5	27.2	51.395	254580000	231330000	23259000	236600000	197090000	39501000	64126000	64126000	0	279320000	77789000	201530000
sp|P05791|ILVD_ECOLI Dihydroxy-acid dehydratase OS=Escherichia coli (strain K12) OX=83333 GN=ilvD PE=1 SV=5;sp|C4ZZ41|ILVD_ECOBW Dihydroxy-acid dehydratase OS=Escherichia coli (strain K12 / MC4100 / BW2952) OX=595496 GN=ilvD PE=3 SV=1	P05791	Dihydroxy-acid dehydratase	ilvD	0.49515	33.1171	0.59545	37.3218	0.65884	39.7169	1.9356	65.9354		14	12	16	13	14	12	16	13	37	65.531	3164200000	2126000000	1038200000	1814600000	955000000	859640000	2339900000	1198200000	1141700000	1164400000	462320000	702130000
sp|P05793|ILVC_ECOLI Ketol-acid reductoisomerase (NADP(+)) OS=Escherichia coli (strain K12) OX=83333 GN=ilvC PE=1 SV=4;sp|C4ZZ44|ILVC_ECOBW Ketol-acid reductoisomerase (NADP(+)) OS=Escherichia coli (strain K12 / MC4100 / BW2952) OX=595496 GN=ilvC PE=3 SV=1	P05793	Ketol-acid reductoisomerase	ilvC	0.37812	27.4374	0.392	28.1609	0.38468	27.7811	2.3874	70.4788		39	42	40	43	39	42	40	43	81.1	54.068	93873000000	67028000000	26846000000	94414000000	66765000000	27649000000	93496000000	66677000000	26820000000	128540000000	36199000000	92340000000
sp|P05825|FEPA_ECOLI Ferrienterobactin receptor OS=Escherichia coli (strain K12) OX=83333 GN=fepA PE=1 SV=2	P05825	Ferrienterobactin receptor	fepA	0.015914	1.56647	0.0079054	0.784339	0.014862	1.46444	2.8769	74.2062		36	34	35	31	36	34	35	31	69.3	82.106	25314000000	25271000000	42801000	25096000000	24957000000	139180000	26209000000	26064000000	144380000	20890000000	5026900000	15863000000
sp|P05852|TSAD_ECOLI tRNA N6-adenosine threonylcarbamoyltransferase OS=Escherichia coli (strain K12) OX=83333 GN=tsaD PE=1 SV=2;sp|C4ZQY1|TSAD_ECOBW tRNA N6-adenosine threonylcarbamoyltransferase OS=Escherichia coli (strain K12 / MC4100 / BW2952) OX=595496	P05852	tRNA N6-adenosine threonylcarbamoyltransferase	tsaD	0.47152	32.0431	0.49367	33.0508	0.50639	33.6161				10	9	11	4	10	9	11	4	47.8	36.008	1530300000	1023700000	506560000	924450000	597060000	327390000	1489600000	974880000	514690000	127830000	8600500	119230000
sp|P06129|BTUB_ECOLI Vitamin B12 transporter BtuB OS=Escherichia coli (strain K12) OX=83333 GN=btuB PE=1 SV=2	P06129	Vitamin B12 transporter BtuB	btuB	0.24993	19.9955	0.28577	22.2256	0.28844	22.3868	1.9646	66.2686		19	21	22	7	19	21	22	7	66.3	68.406	2362800000	2103800000	258940000	2412700000	2019600000	393090000	1814800000	1511300000	303450000	372380000	116080000	256300000
sp|P06136|FTSQ_ECOLI Cell division protein FtsQ OS=Escherichia coli (strain K12) OX=83333 GN=ftsQ PE=1 SV=1	P06136	Cell division protein FtsQ	ftsQ			0.65366	39.5281	0.86406	46.3537				4	5	4	3	4	5	4	3	20.7	31.433	864720000	605480000	259240000	802380000	529500000	272880000	736070000	501840000	234230000	575320000	193090000	382240000
sp|P06149|DLD_ECOLI Quinone-dependent D-lactate dehydrogenase OS=Escherichia coli (strain K12) OX=83333 GN=dld PE=1 SV=3	P06149	D-lactate dehydrogenase	dld	0.48774	32.784	0.51672	34.0683	0.51829	34.1364	2.0019	66.6878		28	26	30	13	28	26	30	13	76.7	64.612	7500200000	5035100000	2465100000	6929000000	4547200000	2381800000	8066600000	5310200000	2756400000	1585400000	475900000	1109500000
sp|P06282|CDH_ECOLI CDP-diacylglycerol pyrophosphatase OS=Escherichia coli (strain K12) OX=83333 GN=cdh PE=3 SV=1;sp|C5A085|CDH_ECOBW CDP-diacylglycerol pyrophosphatase OS=Escherichia coli (strain K12 / MC4100 / BW2952) OX=595496 GN=cdh PE=3 SV=1;sp|B1XB84	P06282	CDP-diacylglycerol pyrophosphatase	cdh										2	2	2		2	2	2	0	13.9	28.45	0	0	0	0	0	0	0	0	0	0	0	0
sp|P06610|BTUE_ECOLI Thioredoxin/glutathione peroxidase BtuE OS=Escherichia coli (strain K12) OX=83333 GN=btuE PE=1 SV=1	P06610	Vitamin B12 transport periplasmic protein BtuE	btuE	0.50957	33.756	0.51877	34.1572	0.51415	33.9563	3.2207	76.3072		5	6	5	11	5	6	5	11	79.2	20.469	1037000000	695680000	341320000	1329300000	879860000	449430000	990180000	717490000	272690000	4799900000	1095300000	3704600000
sp|P06611|BTUD_ECOLI Vitamin B12 import ATP-binding protein BtuD OS=Escherichia coli (strain K12) OX=83333 GN=btuD PE=1 SV=1;sp|C4ZYH1|BTUD_ECOBW Vitamin B12 import ATP-binding protein BtuD OS=Escherichia coli (strain K12 / MC4100 / BW2952) OX=595496 GN=bt	P06611	Vitamin B12 import ATP-binding protein BtuD	btuD										3				3	0	0	0	17.3	27.081	70583000	70583000	0	0	0	0	0	0	0	0	0	0
sp|P06612|TOP1_ECOLI DNA topoisomerase 1 OS=Escherichia coli (strain K12) OX=83333 GN=topA PE=1 SV=2	P06612	DNA topoisomerase 1	topA	0.49034	32.9012	0.56512	36.1071	0.56393	36.0585	2.4281	70.8293		17	15	21	25	17	15	21	25	47.5	97.349	1394600000	908540000	486060000	1052100000	680730000	371410000	3091700000	2080900000	1010800000	1939400000	486260000	1453200000
sp|P06616|ERA_ECOLI GTPase Era OS=Escherichia coli (strain K12) OX=83333 GN=era PE=1 SV=2;sp|C4ZYI9|ERA_ECOBW GTPase Era OS=Escherichia coli (strain K12 / MC4100 / BW2952) OX=595496 GN=era PE=3 SV=1;sp|B1XB40|ERA_ECODH GTPase Era OS=Escherichia coli (strai	P06616	GTPase Era	era	0.55316	35.6151	0.57197	36.3856	0.61829	38.2064				6	5	7	4	6	5	7	4	30.2	33.81	758920000	521380000	237540000	430530000	273360000	157160000	649230000	409520000	239710000	169850000	32755000	137100000
sp|P06709|BIRA_ECOLI Bifunctional ligase/repressor BirA OS=Escherichia coli (strain K12) OX=83333 GN=birA PE=1 SV=1	P06709	Bifunctional ligase/repressor BirA	birA					0.45954	31.4853				2		3	2	2	1	3	2	27.4	35.312	139730000	104410000	35320000	89902000	59135000	30767000	164040000	107430000	56612000	91234000	33924000	57311000
sp|P06710|DPO3X_ECOLI DNA polymerase III subunit tau OS=Escherichia coli (strain K12) OX=83333 GN=dnaX PE=1 SV=1;sp|P06710-2|DPO3X_ECOLI Isoform gamma of DNA polymerase III subunit tau OS=Escherichia coli (strain K12) OX=83333 GN=dnaX	P06710	DNA polymerase III subunit tau	dnaX	0.69648	41.0544	0.78401	43.9465	0.71103	41.5557				7	5	8	4	7	5	8	4	16.5	71.137	214120000	119340000	94774000	176540000	102100000	74440000	227510000	126620000	100880000	0	0	0
sp|P06715|GSHR_ECOLI Glutathione reductase OS=Escherichia coli (strain K12) OX=83333 GN=gor PE=1 SV=1	P06715	Glutathione reductase	gor	0.46142	31.5734	0.5148	33.9847	0.63699	38.9123	2.8703	74.1622		8	8	11	13	8	8	11	13	52	48.772	335010000	227840000	107170000	402530000	269720000	132800000	640520000	398840000	241680000	3205700000	1069500000	2136300000
sp|P06721|METC_ECOLI Cystathionine beta-lyase MetC OS=Escherichia coli (strain K12) OX=83333 GN=metC PE=1 SV=1	P06721	Cystathionine beta-lyase MetC	metC	0.59654	37.3646	0.58628	36.9594	0.62989	38.6462	2.5176	71.5715		7	9	10	11	7	9	10	11	32.7	43.212	1984300000	1251000000	733250000	2039800000	1251200000	788670000	1920400000	1264700000	655650000	2722000000	693940000	2028100000
sp|P06846|EBGR_ECOLI HTH-type transcriptional regulator EbgR OS=Escherichia coli (strain K12) OX=83333 GN=ebgR PE=4 SV=2	P06846	HTH-type transcriptional regulator EbgR	ebgR												2	2	1	1	2	2	9.8	36.21	445420000	445420000	0	12324000	12324000	0	280320000	280320000	0	277370000	149100000	128270000
sp|P06959|ODP2_ECOLI Dihydrolipoyllysine-residue acetyltransferase component of pyruvate dehydrogenase complex OS=Escherichia coli (strain K12) OX=83333 GN=aceF PE=1 SV=3	P06959	Dihydrolipoyllysine-residue acetyltransferase component of pyruvate dehydrogenase complex	aceF	0.42829	29.9862	0.47594	32.2466	0.47114	32.0255	2.6876	72.8821		40	40	42	41	40	40	42	41	70.6	66.095	42054000000	28973000000	13081000000	43285000000	27815000000	15470000000	49287000000	31968000000	17319000000	26650000000	6847400000	19802000000
sp|P06960|OTC2_ECOLI Ornithine carbamoyltransferase subunit F OS=Escherichia coli (strain K12) OX=83333 GN=argF PE=1 SV=4	P06960	Ornithine carbamoyltransferase chain F	argF	0.9131	47.7288	1.1332	53.1221	1.2086	54.7224	1.3431	57.3215		8	8	8	7	2	2	2	2	35.3	36.827	2023300000	884350000	1139000000	1970200000	788800000	1181400000	3115100000	1167900000	1947100000	973670000	362110000	611560000
sp|P06961|CCA_ECOLI Multifunctional CCA protein OS=Escherichia coli (strain K12) OX=83333 GN=cca PE=1 SV=1;sp|C4ZQX3|CCA_ECOBW Multifunctional CCA protein OS=Escherichia coli (strain K12 / MC4100 / BW2952) OX=595496 GN=cca PE=3 SV=1;sp|B1XG61|CCA_ECODH Mul	P06961	Multifunctional CCA protein;CCA-adding enzyme;2-nucleotidase;2,3-cyclic phosphodiesterase;Phosphatase	cca										3	4	3	2	3	4	3	2	12.4	46.467	43958000	43958000	0	21984000	21984000	0	29439000	29439000	0	33655000	10643000	23012000
sp|P06968|DUT_ECOLI Deoxyuridine 5-triphosphate nucleotidohydrolase OS=Escherichia coli (strain K12) OX=83333 GN=dut PE=1 SV=1;sp|C4ZXN2|DUT_ECOBW Deoxyuridine 5-triphosphate nucleotidohydrolase OS=Escherichia coli (strain K12 / MC4100 / BW2952) OX=59549	P06968	Deoxyuridine 5-triphosphate nucleotidohydrolase	dut										2	2	2	3	2	2	2	3	44.4	16.155	0	0	0	0	0	0	0	0	0	0	0	0
sp|P06971|FHUA_ECOLI Ferrichrome outer membrane transporter/phage receptor OS=Escherichia coli (strain K12) OX=83333 GN=fhuA PE=1 SV=2	P06971	Ferrichrome-iron receptor	fhuA	0.04142	3.97726	0.056589	5.35582	0.052415	4.98045	2.3331	69.9979		28	32	30	25	28	32	30	25	54.9	82.181	10014000000	9728200000	285370000	10919000000	10426000000	493530000	10730000000	10235000000	494770000	5145000000	1616200000	3528900000
sp|P06983|HEM3_ECOLI Porphobilinogen deaminase OS=Escherichia coli (strain K12) OX=83333 GN=hemC PE=1 SV=2;sp|C4ZZ69|HEM3_ECOBW Porphobilinogen deaminase OS=Escherichia coli (strain K12 / MC4100 / BW2952) OX=595496 GN=hemC PE=3 SV=1;sp|B1XAH2|HEM3_ECODH Po	P06983	Porphobilinogen deaminase	hemC										3	4	2	4	3	4	2	4	18.2	33.851	26863000	26863000	0	40822000	21828000	18994000	40683000	20321000	20361000	67535000	18027000	49509000
sp|P06986|HIS8_ECOLI Histidinol-phosphate aminotransferase OS=Escherichia coli (strain K12) OX=83333 GN=hisC PE=1 SV=2;sp|C4ZSB0|HIS8_ECOBW Histidinol-phosphate aminotransferase OS=Escherichia coli (strain K12 / MC4100 / BW2952) OX=595496 GN=hisC PE=3 SV=1	P06986	Histidinol-phosphate aminotransferase	hisC	0.32951	24.7843	0.35839	26.3834	0.37989	27.5305	1.9814	66.4587		11	13	11	15	11	13	11	15	60.1	39.36	1485900000	1122700000	363240000	2054500000	1619500000	434930000	1904400000	1495700000	408680000	3819200000	1258800000	2560400000
sp|P06987|HIS7_ECOLI Histidine biosynthesis bifunctional protein HisB OS=Escherichia coli (strain K12) OX=83333 GN=hisB PE=1 SV=1	P06987	Histidine biosynthesis bifunctional protein HisB;Histidinol-phosphatase;Imidazoleglycerol-phosphate dehydratase	hisB	0.28411	22.1251	0.31353	23.8693	0.34936	25.8908	1.8499	64.911		13	15	16	11	13	15	16	11	59.4	40.278	5663900000	4446300000	1217600000	5487100000	4105100000	1382000000	6691300000	4967300000	1723900000	2473000000	840260000	1632800000
sp|P06988|HISX_ECOLI Histidinol dehydrogenase OS=Escherichia coli (strain K12) OX=83333 GN=hisD PE=1 SV=5	P06988	Histidinol dehydrogenase	hisD	0.34604	25.708	0.37275	27.1535	0.41125	29.1408	1.85	64.9123		13	13	11	14	13	13	11	14	43.8	46.11	2628000000	1940700000	687270000	3749800000	2757200000	992620000	3551700000	2545000000	1006700000	7757800000	2722800000	5035000000
sp|P06992|RSMA_ECOLI Ribosomal RNA small subunit methyltransferase A OS=Escherichia coli (strain K12) OX=83333 GN=rsmA PE=1 SV=1;sp|C4ZPX7|RSMA_ECOBW Ribosomal RNA small subunit methyltransferase A OS=Escherichia coli (strain K12 / MC4100 / BW2952) OX=5954	P06992	Ribosomal RNA small subunit methyltransferase A	rsmA	0.38296	27.6913	0.40656	28.9046	0.43241	30.1876	2.4469	70.9884		5	4	4	4	5	4	4	4	23.1	30.42	2131400000	1549100000	582290000	1173700000	831500000	342240000	1128300000	811090000	317170000	745500000	228300000	517200000
sp|P06993|MALT_ECOLI HTH-type transcriptional regulator MalT OS=Escherichia coli (strain K12) OX=83333 GN=malT PE=1 SV=2;sp|C4ZVX0|MALT_ECOBW HTH-type transcriptional regulator MalT OS=Escherichia coli (strain K12 / MC4100 / BW2952) OX=595496 GN=malT PE=3	P06993	HTH-type transcriptional regulator MalT	malT			1.9623	66.2424						5	6	4		5	6	4	1	11.9	103.12	61922000	23001000	38921000	84216000	28038000	56178000	0	0	0	0	0	0
sp|P06996|OMPC_ECOLI Outer membrane protein C OS=Escherichia coli (strain K12) OX=83333 GN=ompC PE=1 SV=1;tr|Q1PI90|Q1PI90_ECOLI Outer membrane protein 1b (Fragment) OS=Escherichia coli (strain K12) OX=83333 GN=ompC PE=4 SV=1	P06996	Outer membrane protein C	ompC	0.49571	33.1421	0.45601	31.3192	0.45459	31.2521	2.3516	70.1635		23	25	24	25	20	22	21	22	89.6	40.368	56781000000	37054000000	19727000000	57550000000	38647000000	18904000000	69008000000	47105000000	21903000000	26706000000	8266800000	18439000000
sp|P06999|PFKB_ECOLI ATP-dependent 6-phosphofructokinase isozyme 2 OS=Escherichia coli (strain K12) OX=83333 GN=pfkB PE=1 SV=2	P06999	ATP-dependent 6-phosphofructokinase isozyme 2	pfkB	0.48621	32.7148	0.46621	31.7969	0.46024	31.5181	3.1063	75.6472		10	8	8	9	10	8	8	9	48.9	32.456	1106300000	771990000	334360000	1100000000	736790000	363210000	1117400000	819450000	297950000	3303800000	769900000	2533900000
sp|P07001|PNTA_ECOLI NAD(P) transhydrogenase subunit alpha OS=Escherichia coli (strain K12) OX=83333 GN=pntA PE=1 SV=2	P07001	NAD(P) transhydrogenase subunit alpha	pntA	0.29241	22.6252	0.30271	23.2369	0.3006	23.1124	2.3676	70.3053		28	30	28	22	28	30	28	22	73.5	54.623	46253000000	38426000000	7826600000	61408000000	47447000000	13961000000	38605000000	29442000000	9163200000	17814000000	7749400000	10065000000
sp|P07003|POXB_ECOLI Pyruvate dehydrogenase [ubiquinone] OS=Escherichia coli (strain K12) OX=83333 GN=poxB PE=1 SV=1	P07003	Pyruvate dehydrogenase [ubiquinone];Alpha-peptide	poxB	1.1025	52.4376	0.95044	48.7295	0.91746	47.8477	3.2638	76.5467		19	18	20	20	19	18	20	20	49.5	62.011	3934800000	1522300000	2412500000	3188400000	1474500000	1713900000	3825200000	2018400000	1806800000	4048100000	851350000	3196700000
sp|P07004|PROA_ECOLI Gamma-glutamyl phosphate reductase OS=Escherichia coli (strain K12) OX=83333 GN=proA PE=1 SV=2;sp|C4ZTA0|PROA_ECOBW Gamma-glutamyl phosphate reductase OS=Escherichia coli (strain K12 / MC4100 / BW2952) OX=595496 GN=proA PE=3 SV=1;sp|B1	P07004	Gamma-glutamyl phosphate reductase	proA	0.53627	34.9073	0.51789	34.1191	0.47969	32.4183	2.7334	73.2148		7	8	8	13	7	8	8	13	37.2	44.63	563260000	364900000	198360000	573630000	426910000	146720000	686940000	537210000	149730000	1470600000	374180000	1096400000
sp|P07012|RF2_ECOLI Peptide chain release factor RF2 OS=Escherichia coli (strain K12) OX=83333 GN=prfB PE=1 SV=3;sp|C5A0G3|RF2_ECOBW Peptide chain release factor 2 OS=Escherichia coli (strain K12 / MC4100 / BW2952) OX=595496 GN=prfB PE=3 SV=1;sp|B1XEH8|RF2	P07012	Peptide chain release factor 2	prfB	0.37671	27.3631	0.44418	30.7566	0.43307	30.2197	2.7493	73.3284		7	11	10	19	7	11	10	19	52.9	41.25	318380000	246550000	71836000	579100000	391120000	187990000	568470000	407060000	161410000	2915800000	798450000	2117300000
sp|P07014|SDHB_ECOLI Succinate dehydrogenase iron-sulfur subunit OS=Escherichia coli (strain K12) OX=83333 GN=sdhB PE=1 SV=1	P07014	Succinate dehydrogenase iron-sulfur subunit	sdhB	0.33897	25.3157	0.35381	26.1344	0.39889	28.5148	1.1308	53.0693		17	18	18	6	17	18	18	6	70.6	26.77	2304400000	1667900000	636530000	3482500000	2356500000	1126000000	3448400000	2368300000	1080100000	199000000	78260000	120740000
sp|P07021|YFIB_ECOLI Putative lipoprotein YfiB OS=Escherichia coli (strain K12) OX=83333 GN=yfiB PE=3 SV=2	P07021	Putative lipoprotein YfiB	yfiB													2	0	0	1	2	35.6	17.244	0	0	0	0	0	0	23568000	0	23568000	110290000	13997000	96297000
sp|P07023|TYRA_ECOLI T-protein OS=Escherichia coli (strain K12) OX=83333 GN=tyrA PE=1 SV=1	P07023	T-protein;Chorismate mutase;Prephenate dehydrogenase	tyrA	0.11546	10.3509	0.11303	10.1552	0.10869	9.80346	3.4585	77.5709		15	11	16	14	15	11	16	14	57.4	42.042	2509500000	2267600000	241990000	1729900000	1571200000	158670000	2397600000	2295700000	101850000	2501200000	548090000	1953100000
sp|P07024|USHA_ECOLI Protein UshA OS=Escherichia coli (strain K12) OX=83333 GN=ushA PE=1 SV=2	P07024	Protein UshA;UDP-sugar hydrolase;5-nucleotidase	ushA	0.488	32.7957	0.40182	28.6642	0.43726	30.4232	2.7967	73.6613		13	14	15	17	13	14	15	17	50.2	60.823	1902700000	1372800000	529910000	2905200000	2303400000	601830000	3128900000	2499100000	629770000	3923600000	951650000	2972000000
sp|P07102|PPA_ECOLI Periplasmic AppA protein OS=Escherichia coli (strain K12) OX=83333 GN=appA PE=1 SV=2	P07102	Periplasmic AppA protein;Phosphoanhydride phosphohydrolase;4-phytase	appA													3	0	0	0	3	11.3	47.056	0	0	0	0	0	0	0	0	0	27831000	0	27831000
sp|P07109|HISP_ECOLI Histidine transport ATP-binding protein HisP OS=Escherichia coli (strain K12) OX=83333 GN=hisP PE=1 SV=2	P07109	Histidine transport ATP-binding protein HisP	hisP	0.34148	25.4555	0.39621	28.3775	0.50992	33.7713				7	9	8	3	7	9	8	3	45.5	28.653	316410000	228680000	87727000	804960000	708190000	96767000	779300000	608690000	170610000	30047000	9087000	20960000
sp|P07117|PUTP_ECOLI Sodium/proline symporter OS=Escherichia coli (strain K12) OX=83333 GN=putP PE=1 SV=1	P07117	Sodium/proline symporter	putP										3	2	3		3	2	3	1	10	54.344	135670000	88951000	46715000	0	0	0	0	0	0	0	0	0
sp|P07118|SYV_ECOLI Valine--tRNA ligase OS=Escherichia coli (strain K12) OX=83333 GN=valS PE=1 SV=2	P07118	Valine--tRNA ligase	valS	0.40032	28.5878	0.40485	28.818	0.41393	29.2751	2.4377	70.9108		29	29	29	32	29	29	29	32	42.6	108.19	11409000000	8486700000	2922200000	9481200000	6724600000	2756600000	9468600000	6444700000	3024000000	14742000000	4095900000	10646000000
sp|P07395|SYFB_ECOLI Phenylalanine--tRNA ligase beta subunit OS=Escherichia coli (strain K12) OX=83333 GN=pheT PE=1 SV=2	P07395	Phenylalanine--tRNA ligase beta subunit	pheT	0.40921	29.0383	0.37922	27.4953	0.40213	28.6799	2.4469	70.9884		30	31	29	29	30	31	29	29	50.9	87.377	5956200000	3820200000	2136000000	5367900000	3781400000	1586500000	5746000000	4169500000	1576600000	6177400000	1774500000	4403000000
sp|P07604|TYRR_ECOLI Transcriptional regulatory protein TyrR OS=Escherichia coli (strain K12) OX=83333 GN=tyrR PE=1 SV=2	P07604	Transcriptional regulatory protein TyrR	tyrR	0.62498	38.4608	0.61058	37.9106	0.53403	34.8122	3.6277	78.391		12	9	6	7	12	9	6	7	36.8	57.655	1538100000	918990000	619080000	982240000	593240000	389000000	924300000	586030000	338270000	366940000	124110000	242830000
sp|P07623|METAS_ECOLI Homoserine O-succinyltransferase OS=Escherichia coli (strain K12) OX=83333 GN=metAS PE=1 SV=4;sp|C5A0V0|METAS_ECOBW Homoserine O-succinyltransferase OS=Escherichia coli (strain K12 / MC4100 / BW2952) OX=595496 GN=metAS PE=3 SV=1;sp|B1	P07623	Homoserine O-succinyltransferase	metA	0.59666	37.3693	0.70172	41.2359	0.79164	44.1852	2.569	71.9809		11	9	9	3	11	9	9	3	49.8	35.727	2227600000	1354200000	873390000	1785300000	1017800000	767450000	2281100000	1194900000	1086300000	582590000	163680000	418910000
sp|P07639|AROB_ECOLI 3-dehydroquinate synthase OS=Escherichia coli (strain K12) OX=83333 GN=aroB PE=1 SV=1;sp|C4ZUP4|AROB_ECOBW 3-dehydroquinate synthase OS=Escherichia coli (strain K12 / MC4100 / BW2952) OX=595496 GN=aroB PE=3 SV=1;sp|B1X736|AROB_ECODH 3-	P07639	3-dehydroquinate synthase	aroB	0.50731	33.6566	0.5618	35.9713	0.56804	36.2261	2.7595	73.4007		14	13	14	11	14	13	14	11	56.4	38.881	5494500000	3478800000	2015800000	5024000000	3176600000	1847400000	5153700000	3384600000	1769000000	2606800000	712330000	1894500000
sp|P07650|TYPH_ECOLI Thymidine phosphorylase OS=Escherichia coli (strain K12) OX=83333 GN=deoA PE=1 SV=3;sp|B1XFJ2|TYPH_ECODH Thymidine phosphorylase OS=Escherichia coli (strain K12 / DH10B) OX=316385 GN=deoA PE=3 SV=1	P07650	Thymidine phosphorylase	deoA	0.53688	34.9331	0.54968	35.4705	0.5174	34.0978	3.1871	76.1171		17	17	15	13	17	17	15	13	60	47.207	3208100000	2236200000	971900000	2231300000	1512600000	718620000	2215500000	1526800000	688700000	1607300000	345230000	1262000000
sp|P07654|PSTA_ECOLI Phosphate transport system permease protein PstA OS=Escherichia coli (strain K12) OX=83333 GN=pstA PE=1 SV=1	P07654	Phosphate transport system permease protein PstA	pstA											2			0	2	1	0	7.4	32.321	0	0	0	0	0	0	0	0	0	0	0	0
sp|P07762|GLGB_ECOLI 1,4-alpha-glucan branching enzyme GlgB OS=Escherichia coli (strain K12) OX=83333 GN=glgB PE=1 SV=1	P07762	1,4-alpha-glucan branching enzyme GlgB	glgB							2.5883	72.1317		5	4	8	8	5	4	8	8	26.6	84.336	275430000	248720000	26709000	280280000	195930000	84350000	358420000	281790000	76629000	634510000	137630000	496870000
sp|P07813|SYL_ECOLI Leucine--tRNA ligase OS=Escherichia coli (strain K12) OX=83333 GN=leuS PE=1 SV=2;sp|C4ZWC9|SYL_ECOBW Leucine--tRNA ligase OS=Escherichia coli (strain K12 / MC4100 / BW2952) OX=595496 GN=leuS PE=3 SV=1	P07813	Leucine--tRNA ligase	leuS	0.39434	28.2815	0.44937	31.0045	0.4536	31.2053	2.4173	70.7371		29	29	29	32	29	29	29	32	50.7	97.233	11906000000	8496100000	3410100000	10761000000	7394700000	3365900000	12789000000	8820500000	3968200000	13778000000	3673300000	10105000000
sp|P07821|FHUC_ECOLI Iron(3+)-hydroxamate import ATP-binding protein FhuC OS=Escherichia coli (strain K12) OX=83333 GN=fhuC PE=1 SV=3	P07821	Iron(3+)-hydroxamate import ATP-binding protein FhuC	fhuC										6	6	7	4	6	6	7	4	45.7	28.886	95557000	95557000	0	158370000	158370000	0	164490000	164490000	0	48441000	17763000	30678000
sp|P07862|DDLB_ECOLI D-alanine--D-alanine ligase B OS=Escherichia coli (strain K12) OX=83333 GN=ddlB PE=1 SV=3	P07862	D-alanine--D-alanine ligase B	ddlB										4	2	3	6	4	2	3	6	26.5	32.839	0	0	0	41039000	0	41039000	46530000	0	46530000	262870000	58665000	204200000
sp|P07913|TDH_ECOLI L-threonine 3-dehydrogenase OS=Escherichia coli (strain K12) OX=83333 GN=tdh PE=1 SV=1;sp|C4ZXK8|TDH_ECOBW L-threonine 3-dehydrogenase OS=Escherichia coli (strain K12 / MC4100 / BW2952) OX=595496 GN=tdh PE=3 SV=1;sp|B1X950|TDH_ECODH L-t	P07913	L-threonine 3-dehydrogenase	tdh	0.63511	38.842								6	5	4	3	6	5	4	3	34	37.239	402320000	235300000	167010000	117560000	68657000	48903000	49348000	33221000	16127000	52353000	13655000	38698000
sp|P08142|ILVB_ECOLI Acetolactate synthase isozyme 1 large subunit OS=Escherichia coli (strain K12) OX=83333 GN=ilvB PE=1 SV=1	P08142	Acetolactate synthase isozyme 1 large subunit	ilvB	0.88374	46.9141	0.9057	47.5258	0.9834	49.5815	1.534	60.5367		14	12	12	8	14	12	12	8	46.6	60.44	10312000000	5323100000	4989300000	6453700000	3394400000	3059300000	5889700000	2976800000	2912800000	1448100000	549920000	898180000
sp|P08178|PUR5_ECOLI Phosphoribosylformylglycinamidine cyclo-ligase OS=Escherichia coli (strain K12) OX=83333 GN=purM PE=1 SV=3;sp|C4ZX74|PUR5_ECOBW Phosphoribosylformylglycinamidine cyclo-ligase OS=Escherichia coli (strain K12 / MC4100 / BW2952) OX=595496	P08178	Phosphoribosylformylglycinamidine cyclo-ligase	purM	0.41067	29.1117	0.47563	32.2323	0.48565	32.6894	2.4665	71.1525		11	12	13	13	11	12	13	13	54.5	36.854	11719000000	8161500000	3557400000	7764400000	4935700000	2828700000	8724000000	5569500000	3154500000	4471200000	968490000	3502700000
sp|P08179|PUR3_ECOLI Phosphoribosylglycinamide formyltransferase OS=Escherichia coli (strain K12) OX=83333 GN=purN PE=1 SV=1	P08179	Phosphoribosylglycinamide formyltransferase	purN							2.6322	72.4685		3	3	4	3	3	3	4	3	32.5	23.238	63112000	47301000	15812000	59561000	41684000	17877000	52149000	35756000	16393000	136260000	37645000	98614000
sp|P08192|FOLC_ECOLI Dihydrofolate synthase/folylpolyglutamate synthase OS=Escherichia coli (strain K12) OX=83333 GN=folC PE=1 SV=2	P08192	Bifunctional protein FolC;Folylpolyglutamate synthase;Dihydrofolate synthase	folC	0.44233	30.6677	0.51199	33.862	0.5262	34.4778	2.5071	71.4864		11	9	8	7	11	9	8	7	39.3	45.405	1197800000	841060000	356760000	872130000	617630000	254500000	783390000	517240000	266150000	319450000	95205000	224250000
sp|P08200|IDH_ECOLI Isocitrate dehydrogenase [NADP] OS=Escherichia coli (strain K12) OX=83333 GN=icd PE=1 SV=1;tr|Q1PI72|Q1PI72_ECOLI Isocitrate dehydrogenase (Fragment) OS=Escherichia coli (strain K12) OX=83333 GN=icd PE=4 SV=1	P08200	Isocitrate dehydrogenase [NADP]	icd	0.31177	23.7671	0.34898	25.8699	0.34344	25.5642	2.5782	72.053		19	20	24	25	19	20	24	25	65.9	45.756	24210000000	18833000000	5377700000	26727000000	19390000000	7337000000	21519000000	16506000000	5012200000	55128000000	13766000000	41362000000
sp|P08244|PYRF_ECOLI Orotidine 5-phosphate decarboxylase OS=Escherichia coli (strain K12) OX=83333 GN=pyrF PE=1 SV=1;sp|C4ZTX6|PYRF_ECOBW Orotidine 5-phosphate decarboxylase OS=Escherichia coli (strain K12 / MC4100 / BW2952) OX=595496 GN=pyrF PE=3 SV=1;s	P08244	Orotidine 5-phosphate decarboxylase	pyrF	0.48147	32.4995	0.63323	38.7716	0.59416	37.271	2.2911	69.615		10	7	9	9	10	7	9	9	68.6	26.35	2920000000	2001100000	918890000	2488700000	1552800000	935920000	2553100000	1522100000	1031000000	1387600000	395250000	992380000
sp|P08245|YCIH_ECOLI Uncharacterized protein YciH OS=Escherichia coli (strain K12) OX=83333 GN=yciH PE=1 SV=1	P08245	Uncharacterized protein YciH	yciH													3	0	0	0	3	34.3	11.396	0	0	0	0	0	0	0	0	0	163910000	0	163910000
sp|P08312|SYFA_ECOLI Phenylalanine--tRNA ligase alpha subunit OS=Escherichia coli (strain K12) OX=83333 GN=pheS PE=1 SV=2;sp|C4ZYH6|SYFA_ECOBW Phenylalanine--tRNA ligase alpha subunit OS=Escherichia coli (strain K12 / MC4100 / BW2952) OX=595496 GN=pheS PE=	P08312	Phenylalanine--tRNA ligase alpha subunit	pheS	0.38136	27.6076	0.3919	28.1558	0.40484	28.8175	2.386	70.4666		18	19	17	16	18	19	17	16	66.7	36.831	3538200000	2769400000	768790000	3956000000	2792500000	1163500000	3836400000	2558100000	1278300000	3256500000	751810000	2504700000
sp|P08331|CPDB_ECOLI 2,3-cyclic-nucleotide 2-phosphodiesterase/3-nucleotidase OS=Escherichia coli (strain K12) OX=83333 GN=cpdB PE=1 SV=2	P08331	2,3-cyclic-nucleotide 2-phosphodiesterase/3-nucleotidase	cpdB	0.42799	29.9715	0.38159	27.6196	0.41147	29.1519	2.4281	70.8293		9	13	7	12	9	13	7	12	39.4	70.831	559860000	431000000	128860000	947930000	685960000	261980000	783700000	522750000	260950000	925950000	252160000	673790000
sp|P08373|MURB_ECOLI UDP-N-acetylenolpyruvoylglucosamine reductase OS=Escherichia coli (strain K12) OX=83333 GN=murB PE=1 SV=1	P08373	UDP-N-acetylenolpyruvoylglucosamine reductase	murB							2.3538	70.1831				2	5	0	1	2	5	18.4	37.851	0	0	0	0	0	0	30126000	30126000	0	286520000	75829000	210690000
sp|P08390|USG_ECOLI USG-1 protein OS=Escherichia coli (strain K12) OX=83333 GN=usg PE=1 SV=1	P08390	USG-1 protein	usg	0.36254	26.6077	0.49365	33.0499	0.43356	30.2436	2.9031	74.3793		5	6	5	8	5	6	5	8	32	36.364	450000000	344050000	105950000	342830000	270630000	72197000	248500000	202740000	45765000	409570000	74986000	334580000
sp|P08395|SPPA_ECOLI Protease 4 OS=Escherichia coli (strain K12) OX=83333 GN=sppA PE=1 SV=2	P08395	Protease 4	sppA	0.38353	27.7211	0.37762	27.411	0.38523	27.8098	2.4202	70.7619		12	11	12	6	12	11	12	6	33.3	67.219	1649600000	1187300000	462280000	2028800000	1362500000	666310000	2273700000	1567400000	706390000	458430000	94097000	364330000
sp|P08400|PHOR_ECOLI Phosphate regulon sensor protein PhoR OS=Escherichia coli (strain K12) OX=83333 GN=phoR PE=1 SV=1	P08400	Phosphate regulon sensor protein PhoR	phoR										3				3	1	0	0	8.8	49.629	66058000	66058000	0	0	0	0	0	0	0	0	0	0
sp|P08506|DACC_ECOLI D-alanyl-D-alanine carboxypeptidase DacC OS=Escherichia coli (strain K12) OX=83333 GN=dacC PE=1 SV=2	P08506	D-alanyl-D-alanine carboxypeptidase DacC	dacC	0.64709	39.2869	0.63039	38.665	0.60513	37.6998	2.8463	74.001		24	26	27	21	23	25	26	20	69.5	43.608	13427000000	8144500000	5282900000	14963000000	8868200000	6095000000	15949000000	10148000000	5800600000	4677600000	1342700000	3335000000
sp|P08622|DNAJ_ECOLI Chaperone protein DnaJ OS=Escherichia coli (strain K12) OX=83333 GN=dnaJ PE=1 SV=3;sp|B1XBE0|DNAJ_ECODH Chaperone protein DnaJ OS=Escherichia coli (strain K12 / DH10B) OX=316385 GN=dnaJ PE=3 SV=1;sp|C4ZPU1|DNAJ_ECOBW Chaperone protein	P08622	Chaperone protein DnaJ	dnaJ	0.41507	29.3321	0.47605	32.2516	0.51505	33.9956	1.7822	64.0572		13	9	10	8	13	9	10	8	44.4	41.1	645290000	529890000	115400000	653820000	384450000	269370000	735160000	455380000	279790000	493150000	62055000	431090000
sp|P08660|AK3_ECOLI Lysine-sensitive aspartokinase 3 OS=Escherichia coli (strain K12) OX=83333 GN=lysC PE=1 SV=2	P08660	Lysine-sensitive aspartokinase 3	lysC										5	3	4	6	5	3	4	6	23.4	48.531	31470000	24106000	7364200	0	0	0	26512000	26512000	0	68178000	0	68178000
sp|P08839|PT1_ECOLI Phosphoenolpyruvate-protein phosphotransferase OS=Escherichia coli (strain K12) OX=83333 GN=ptsI PE=1 SV=1	P08839	Phosphoenolpyruvate-protein phosphotransferase	ptsI	0.32789	24.6926	0.36751	26.8744	0.35107	25.9846	2.4551	71.0573		36	35	34	33	36	35	34	33	79.1	63.561	32279000000	25374000000	6905700000	25537000000	18676000000	6860500000	31518000000	24061000000	7456800000	26565000000	7717600000	18847000000
sp|P08956|T1RK_ECOLI Type I restriction enzyme EcoKI R protein OS=Escherichia coli (strain K12) OX=83333 GN=hsdR PE=3 SV=3	P08956	Type I restriction enzyme EcoKI R protein	hsdR										2		2	3	2	1	2	3	7.9	134.09	8396000	8396000	0	26038000	16575000	9463300	0	0	0	696910000	200950000	495960000
sp|P08957|T1MK_ECOLI Type I restriction enzyme EcoKI M protein OS=Escherichia coli (strain K12) OX=83333 GN=hsdM PE=1 SV=1	P08957	Type I restriction enzyme EcoKI M protein	hsdM	0.45397	31.2228	0.56028	35.9089	0.54935	35.4568				15	13	14	6	15	13	14	6	48.4	59.306	2205200000	1558200000	647000000	805910000	488320000	317590000	1098700000	627160000	471520000	130730000	29194000	101540000
sp|P08997|MASY_ECOLI Malate synthase A OS=Escherichia coli (strain K12) OX=83333 GN=aceB PE=1 SV=1	P08997	Malate synthase A	aceB	0.5155	34.0152	0.59226	37.1962	0.54413	35.2386	3.7752	79.0585		18	23	21	31	18	23	21	31	59.8	60.273	5373300000	3483900000	1889400000	6510200000	4262600000	2247600000	6851700000	4402400000	2449200000	27018000000	5206900000	21811000000
sp|P09029|PURK_ECOLI N5-carboxyaminoimidazole ribonucleotide synthase OS=Escherichia coli (strain K12) OX=83333 GN=purK PE=1 SV=2	P09029	N5-carboxyaminoimidazole ribonucleotide synthase	purK											2	2	4	1	2	2	4	28.2	39.461	0	0	0	0	0	0	64924000	64924000	0	504700000	141740000	362960000
sp|P09030|EX3_ECOLI Exodeoxyribonuclease III OS=Escherichia coli (strain K12) OX=83333 GN=xthA PE=1 SV=4	P09030	Exodeoxyribonuclease III	xthA	0.48405	32.6168	0.50757	33.6681	0.53089	34.6785	2.3766	70.3844		7	7	6	9	7	7	6	9	48.5	30.969	368970000	276010000	92961000	815030000	531030000	283990000	807440000	555490000	251950000	1893200000	389790000	1503400000
sp|P09053|AVTA_ECOLI Valine--pyruvate aminotransferase OS=Escherichia coli (strain K12) OX=83333 GN=avtA PE=1 SV=3	P09053	Valine--pyruvate aminotransferase	avtA	0.41705	29.4309	0.49236	32.992	0.50719	33.6514	3.6182	78.3465		7	5	5	7	7	5	5	7	21.6	46.711	379370000	192720000	186650000	143220000	84098000	59119000	162420000	109300000	53119000	296510000	25613000	270890000
sp|P09099|XYLB_ECOLI Xylulose kinase OS=Escherichia coli (strain K12) OX=83333 GN=xylB PE=1 SV=1	P09099	Xylulose kinase	xylB													4	0	0	0	4	14.5	52.618	0	0	0	0	0	0	0	0	0	60350000	0	60350000
sp|P09127|HEMX_ECOLI Protein HemX OS=Escherichia coli (strain K12) OX=83333 GN=hemX PE=1 SV=1	P09127	Putative uroporphyrinogen-III C-methyltransferase	hemX	0.39963	28.5525	0.44041	30.5753	0.43779	30.4488	2.4513	71.0254		18	20	19	11	18	20	19	11	53.4	42.962	5574900000	3886500000	1688400000	5097000000	3464700000	1632300000	5726000000	3903200000	1822700000	1170200000	308930000	861300000
sp|P09147|GALE_ECOLI UDP-glucose 4-epimerase OS=Escherichia coli (strain K12) OX=83333 GN=galE PE=1 SV=1	P09147	UDP-glucose 4-epimerase	galE	0.60657	37.7556	0.64645	39.2633	0.63563	38.8615	2.8266	73.8671		10	9	9	9	10	9	9	9	54.4	37.265	908380000	533640000	374740000	591930000	354870000	237060000	497750000	306710000	191040000	960860000	215460000	745400000
sp|P09148|GAL7_ECOLI Galactose-1-phosphate uridylyltransferase OS=Escherichia coli (strain K12) OX=83333 GN=galT PE=1 SV=2	P09148	Galactose-1-phosphate uridylyltransferase	galT													2	1	0	0	2	13.2	39.645	0	0	0	0	0	0	0	0	0	42950000	0	42950000
sp|P09151|LEU1_ECOLI 2-isopropylmalate synthase OS=Escherichia coli (strain K12) OX=83333 GN=leuA PE=1 SV=5;sp|C4ZPZ7|LEU1_ECOBW 2-isopropylmalate synthase OS=Escherichia coli (strain K12 / MC4100 / BW2952) OX=595496 GN=leuA PE=3 SV=1	P09151	2-isopropylmalate synthase	leuA	0.51845	34.1434	0.53516	34.8602	0.54624	35.327	3.4277	77.4149		28	26	31	27	28	26	31	27	86	57.297	15629000000	10099000000	5529500000	13795000000	9237700000	4557500000	16967000000	10660000000	6307300000	9026300000	1950100000	7076200000
sp|P09155|RND_ECOLI Ribonuclease D OS=Escherichia coli (strain K12) OX=83333 GN=rnd PE=1 SV=1	P09155	Ribonuclease D	rnd													2	0	0	0	2	9.9	42.734	0	0	0	0	0	0	0	0	0	34103000	13580000	20523000
sp|P09158|SPEE_ECOLI Polyamine aminopropyltransferase OS=Escherichia coli (strain K12) OX=83333 GN=speE PE=1 SV=2;sp|C4ZRL4|SPEE_ECOBW Polyamine aminopropyltransferase OS=Escherichia coli (strain K12 / MC4100 / BW2952) OX=595496 GN=speE PE=3 SV=1;sp|B1XC96	P09158	Polyamine aminopropyltransferase	speE			0.4573	31.3799						2	3	3	4	2	3	3	4	28.8	32.321	354960000	298700000	56256000	539710000	361870000	177840000	222660000	222660000	0	356650000	116990000	239650000
sp|P09169|OMPT_ECOLI Protease 7 OS=Escherichia coli (strain K12) OX=83333 GN=ompT PE=1 SV=1	P09169	Protease 7	ompT	0.23094	18.7613	0.26211	20.7676	0.2754	21.5932	2.4934	71.3746		20	21	22	23	19	20	21	22	78.5	35.562	85388000000	70106000000	15281000000	75751000000	61607000000	14145000000	94774000000	75301000000	19473000000	42605000000	10926000000	31678000000
sp|P09323|PTW3C_ECOLI PTS system N-acetylglucosamine-specific EIICBA component OS=Escherichia coli (strain K12) OX=83333 GN=nagE PE=1 SV=1	P09323	PTS system N-acetylglucosamine-specific EIICBA component;N-acetylglucosamine permease IIC component;N-acetylglucosamine-specific phosphotransferase enzyme IIB component;N-acetylglucosamine-specific phosphotransferase enzyme IIA component	nagE	0.32244	24.3822	0.37373	27.2055	0.34302	25.5409	2.6864	72.8733		11	10	8	8	11	10	8	8	26.4	68.346	1659400000	1271500000	387930000	1215100000	922890000	292250000	1259600000	930900000	328660000	778330000	232150000	546180000
sp|P09372|GRPE_ECOLI Protein GrpE OS=Escherichia coli (strain K12) OX=83333 GN=grpE PE=1 SV=1;sp|C4ZYN1|GRPE_ECOBW Protein GrpE OS=Escherichia coli (strain K12 / MC4100 / BW2952) OX=595496 GN=grpE PE=1 SV=1;sp|B1XBT4|GRPE_ECODH Protein GrpE OS=Escherichia	P09372	Protein GrpE	grpE	0.42026	29.5904	0.49974	33.3218	0.52769	34.5417	2.6241	72.4069		11	10	9	12	11	10	9	12	64.5	21.798	3198900000	2287700000	911250000	4025400000	2690900000	1334500000	4281200000	2996300000	1284900000	5550100000	1651200000	3898900000
sp|P09373|PFLB_ECOLI Formate acetyltransferase 1 OS=Escherichia coli (strain K12) OX=83333 GN=pflB PE=1 SV=2	P09373	Formate acetyltransferase 1	pflB	0.57028	36.3171	0.65012	39.3983	0.6348	38.8304	4.3996	81.4801		53	47	51	52	49	43	46	47	76.6	85.356	53292000000	32857000000	20435000000	41807000000	24687000000	17120000000	48977000000	29528000000	19449000000	46105000000	8360200000	37745000000
sp|P09394|GLPQ_ECOLI Glycerophosphodiester phosphodiesterase, periplasmic OS=Escherichia coli (strain K12) OX=83333 GN=glpQ PE=1 SV=2	P09394	Glycerophosphoryl diester phosphodiesterase	glpQ	0.76226	43.2547	1.0289	50.7122						2	4	2	2	2	4	2	2	20.4	40.843	1591700000	709420000	882320000	1447300000	670190000	777090000	510900000	284970000	225930000	26921000	0	26921000
sp|P09424|MTLD_ECOLI Mannitol-1-phosphate 5-dehydrogenase OS=Escherichia coli (strain K12) OX=83333 GN=mtlD PE=1 SV=3;sp|C4ZXJ1|MTLD_ECOBW Mannitol-1-phosphate 5-dehydrogenase OS=Escherichia coli (strain K12 / MC4100 / BW2952) OX=595496 GN=mtlD PE=3 SV=1;s	P09424	Mannitol-1-phosphate 5-dehydrogenase	mtlD	0.64795	39.3185	0.61583	38.1123	0.67479	40.291	2.9504	74.6861		5	6	6	12	5	6	6	12	42.9	41.139	360000000	256790000	103220000	724480000	441040000	283440000	625760000	358530000	267220000	3247400000	704930000	2542500000
sp|P09546|PUTA_ECOLI Bifunctional protein PutA OS=Escherichia coli (strain K12) OX=83333 GN=putA PE=1 SV=3	P09546	Bifunctional protein PutA;Proline dehydrogenase;Delta-1-pyrroline-5-carboxylate dehydrogenase	putA										7	6	5		7	6	5	1	16.5	143.81	52313000	32207000	20106000	136210000	136210000	0	48988000	40109000	8879500	14853000	0	14853000
sp|P09549|DEDD_ECOLI Cell division protein DedD OS=Escherichia coli (strain K12) OX=83333 GN=dedD PE=3 SV=2	P09549	Cell division protein DedD	dedD			0.39528	28.3298	0.44753	30.9168	2.7807	73.5499		2	4	4	2	2	4	4	2	27.7	22.938	750260000	737320000	12937000	873950000	819340000	54609000	740670000	642600000	98075000	147250000	47554000	99696000
sp|P09551|ARGT_ECOLI Lysine/arginine/ornithine-binding periplasmic protein OS=Escherichia coli (strain K12) OX=83333 GN=argT PE=1 SV=3	P09551	Lysine/arginine/ornithine-binding periplasmic protein	argT	0.38321	27.7044	0.44088	30.598	0.43147	30.1417	2.5273	71.6497		11	14	10	12	11	14	10	12	54.2	27.991	4623300000	3457100000	1166200000	5637700000	3960600000	1677100000	3998500000	2692000000	1306600000	6776000000	2088900000	4687100000
sp|P09831|GLTB_ECOLI Glutamate synthase [NADPH] large chain OS=Escherichia coli (strain K12) OX=83333 GN=gltB PE=1 SV=3	P09831	Glutamate synthase [NADPH] large chain	gltB	0.53982	35.0573	0.59148	37.1654	0.61363	38.0279	2.027	66.964		76	70	70	53	76	70	70	53	70.3	163.3	32242000000	20813000000	11428000000	32194000000	19499000000	12696000000	37120000000	22171000000	14949000000	15508000000	4635900000	10872000000
sp|P09832|GLTD_ECOLI Glutamate synthase [NADPH] small chain OS=Escherichia coli (strain K12) OX=83333 GN=gltD PE=1 SV=3	P09832	Glutamate synthase [NADPH] small chain	gltD	0.41061	29.1087	0.47551	32.2268	0.4889	32.8363	2.1482	68.2358		28	27	29	22	28	27	29	22	73.3	52.015	14061000000	9792900000	4268600000	15424000000	10180000000	5244700000	17727000000	11914000000	5813800000	7026300000	2167500000	4858800000
sp|P09980|REP_ECOLI ATP-dependent DNA helicase Rep OS=Escherichia coli (strain K12) OX=83333 GN=rep PE=1 SV=3	P09980	ATP-dependent DNA helicase Rep	rep	0.4962	33.164	0.6145	38.0613	0.55832	35.8283	2.44	70.9302		7	6	4	4	7	6	4	4	19.6	77.023	1620500000	1521600000	98920000	239460000	141560000	97894000	123220000	79766000	43450000	85375000	29733000	55642000
sp|P09996|YIDB_ECOLI Uncharacterized protein YidB OS=Escherichia coli (strain K12) OX=83333 GN=yidB PE=4 SV=1	P09996	Uncharacterized protein YidB	yidB							3.358	77.0537					3	0	0	1	3	43.9	13.786	0	0	0	0	0	0	29184000	0	29184000	1113100000	263880000	849260000
sp|P0A698|UVRA_ECOLI UvrABC system protein A OS=Escherichia coli (strain K12) OX=83333 GN=uvrA PE=1 SV=1	P0A698	UvrABC system protein A	uvrA										5	7	6	2	5	7	6	2	14.9	103.87	58431000	33353000	25078000	0	0	0	0	0	0	29109000	12522000	16587000
sp|P0A6A0|UBIB_ECOLI Probable protein kinase UbiB OS=Escherichia coli (strain K12) OX=83333 GN=ubiB PE=1 SV=1;sp|C5A011|UBIB_ECOBW Probable protein kinase UbiB OS=Escherichia coli (strain K12 / MC4100 / BW2952) OX=595496 GN=ubiB PE=3 SV=1;sp|B1XAJ9|UBIB_EC	P0A6A0	Probable protein kinase UbiB	ubiB					0.44454	30.7738				5	4	3		5	4	3	1	16.7	63.202	20422000	20422000	0	34716000	25907000	8809300	85619000	55843000	29776000	0	0	0
sp|P0A6A3|ACKA_ECOLI Acetate kinase OS=Escherichia coli (strain K12) OX=83333 GN=ackA PE=1 SV=1	P0A6A3	Acetate kinase	ackA	0.551	35.5255	0.59054	37.1283	0.58692	36.9849	2.7294	73.186		9	10	10	15	9	10	10	15	60.5	43.29	1624900000	1071400000	553500000	1976300000	1238900000	737390000	2138400000	1367100000	771320000	4425300000	1113300000	3312100000
sp|P0A6A6|LEUC_ECOLI 3-isopropylmalate dehydratase large subunit OS=Escherichia coli (strain K12) OX=83333 GN=leuC PE=1 SV=2;sp|C4ZPZ5|LEUC_ECOBW 3-isopropylmalate dehydratase large subunit OS=Escherichia coli (strain K12 / MC4100 / BW2952) OX=595496 GN=le	P0A6A6	3-isopropylmalate dehydratase large subunit	leuC	0.56798	36.2237	0.616	38.1188	0.63916	38.9931	2.8483	74.0145		20	18	21	14	20	18	21	14	53.4	49.881	19272000000	11936000000	7336200000	13354000000	8180700000	5173000000	13452000000	8004700000	5447600000	3877500000	1003200000	2874300000
sp|P0A6A8|ACP_ECOLI Acyl carrier protein OS=Escherichia coli (strain K12) OX=83333 GN=acpP PE=1 SV=2;sp|C4ZS34|ACP_ECOBW Acyl carrier protein OS=Escherichia coli (strain K12 / MC4100 / BW2952) OX=595496 GN=acpP PE=3 SV=1;sp|B1XA04|ACP_ECODH Acyl carrier pr	P0A6A8	Acyl carrier protein	acpP	0.43848	30.4822	0.46763	31.8629	0.46746	31.855	2.2734	69.4507		5	5	5	7	5	5	5	7	44.9	8.6394	4707400000	3897100000	810330000	5564600000	4644600000	920080000	6072900000	5155300000	917630000	19177000000	3161800000	16015000000
sp|P0A6B4|ALR1_ECOLI Alanine racemase, biosynthetic OS=Escherichia coli (strain K12) OX=83333 GN=alr PE=1 SV=1	P0A6B4	Alanine racemase, biosynthetic	alr													2	0	0	1	2	6.1	39.152	0	0	0	0	0	0	0	0	0	0	0	0
sp|P0A6B7|ISCS_ECOLI Cysteine desulfurase IscS OS=Escherichia coli (strain K12) OX=83333 GN=iscS PE=1 SV=1;sp|C4ZXA5|ISCS_ECOBW Cysteine desulfurase IscS OS=Escherichia coli (strain K12 / MC4100 / BW2952) OX=595496 GN=iscS PE=3 SV=1;sp|B1XB05|ISCS_ECODH Cy	P0A6B7	Cysteine desulfurase IscS	iscS	0.54407	35.2361	0.6528	39.4966	0.61409	38.0456	2.6665	72.726		28	25	27	19	28	25	27	19	71.5	45.089	8943100000	5801700000	3141400000	6650100000	3940400000	2709600000	6684400000	4224400000	2460000000	1890200000	455070000	1435200000
sp|P0A6C1|END4_ECOLI Endonuclease 4 OS=Escherichia coli (strain K12) OX=83333 GN=nfo PE=1 SV=1;sp|C4ZU09|END4_ECOBW Probable endonuclease 4 OS=Escherichia coli (strain K12 / MC4100 / BW2952) OX=595496 GN=nfo PE=3 SV=1;sp|B1X857|END4_ECODH Probable endonucl	P0A6C1	Endonuclease 4;Probable endonuclease 4	nfo					0.6686	40.0695	2.3535	70.1804		4	4	3	4	4	4	3	4	39.3	31.479	205910000	182940000	22976000	269820000	190350000	79475000	336950000	190020000	146930000	274890000	32777000	242110000
sp|P0A6C5|ARGA_ECOLI Amino-acid acetyltransferase OS=Escherichia coli (strain K12) OX=83333 GN=argA PE=1 SV=1	P0A6C5	Amino-acid acetyltransferase	argA	0.50782	33.6791	0.71414	41.6617	0.71475	41.6825				11	12	14	3	11	12	14	3	41.5	49.195	388140000	309150000	78987000	582850000	334880000	247960000	871400000	537320000	334090000	0	0	0
sp|P0A6D3|AROA_ECOLI 3-phosphoshikimate 1-carboxyvinyltransferase OS=Escherichia coli (strain K12) OX=83333 GN=aroA PE=1 SV=1;sp|C4ZQ34|AROA_ECOBW 3-phosphoshikimate 1-carboxyvinyltransferase OS=Escherichia coli (strain K12 / MC4100 / BW2952) OX=595496 GN=	P0A6D3	3-phosphoshikimate 1-carboxyvinyltransferase	aroA	0.31777	24.1142	0.34437	25.6157	0.31754	24.101	2.5369	71.7267		7	4	8	15	7	4	8	15	38.4	46.095	322140000	256310000	65829000	305100000	239880000	65222000	586620000	460870000	125750000	2817500000	779560000	2038000000
sp|P0A6D7|AROK_ECOLI Shikimate kinase 1 OS=Escherichia coli (strain K12) OX=83333 GN=aroK PE=1 SV=2;sp|B1X737|AROK_ECODH Shikimate kinase 1 OS=Escherichia coli (strain K12 / DH10B) OX=316385 GN=aroK PE=3 SV=1	P0A6D7	Shikimate kinase 1	aroK			0.82823	45.3023	0.51249	33.8839	2.4714	71.1932		3	3	4	7	3	3	4	7	48	19.538	159480000	159480000	0	318160000	238880000	79283000	1569200000	1012400000	556760000	1384600000	400360000	984280000
sp|P0A6E1|AROL_ECOLI Shikimate kinase 2 OS=Escherichia coli (strain K12) OX=83333 GN=aroL PE=1 SV=3;sp|C4ZTE7|AROL_ECOBW Shikimate kinase 2 OS=Escherichia coli (strain K12 / MC4100 / BW2952) OX=595496 GN=aroL PE=3 SV=1;sp|B1XEX7|AROL_ECODH Shikimate kinase	P0A6E1	Shikimate kinase 2	aroL													3	0	1	0	3	14.4	19.151	0	0	0	0	0	0	0	0	0	0	0	0
sp|P0A6E4|ASSY_ECOLI Argininosuccinate synthase OS=Escherichia coli (strain K12) OX=83333 GN=argG PE=1 SV=2;sp|C4ZSR2|ASSY_ECOBW Argininosuccinate synthase OS=Escherichia coli (strain K12 / MC4100 / BW2952) OX=595496 GN=argG PE=3 SV=1;sp|B1XGY3|ASSY_ECODH	P0A6E4	Argininosuccinate synthase	argG	0.54679	35.35	0.66568	39.9645	0.70964	41.5082	1.6187	61.8131		38	36	36	28	38	36	36	28	83.7	49.898	66716000000	39895000000	26821000000	53247000000	28806000000	24441000000	57915000000	30425000000	27490000000	10186000000	3308400000	6877600000
sp|P0A6E6|ATPE_ECOLI ATP synthase epsilon chain OS=Escherichia coli (strain K12) OX=83333 GN=atpC PE=1 SV=2;sp|C4ZZ09|ATPE_ECOBW ATP synthase epsilon chain OS=Escherichia coli (strain K12 / MC4100 / BW2952) OX=595496 GN=atpC PE=3 SV=1;sp|B1X9V9|ATPE_ECODH	P0A6E6	ATP synthase epsilon chain	atpC	0.3008	23.1242	0.36162	26.5581	0.35963	26.4506	2.105	67.7939		6	6	7	4	6	6	7	4	72.7	15.068	11052000000	9347500000	1704100000	13046000000	9471800000	3574300000	11854000000	8545000000	3308700000	1273500000	389490000	883970000
sp|P0A6F1|CARA_ECOLI Carbamoyl-phosphate synthase small chain OS=Escherichia coli (strain K12) OX=83333 GN=carA PE=1 SV=1	P0A6F1	Carbamoyl-phosphate synthase small chain	carA	0.46079	31.5439	0.59473	37.2935	0.58694	36.9856	1.7008	62.9739		20	19	18	17	20	19	18	17	72.5	41.431	13272000000	8367600000	4904800000	13252000000	7658000000	5593800000	15231000000	8903000000	6328300000	6539700000	2274800000	4264900000
sp|P0A6F3|GLPK_ECOLI Glycerol kinase OS=Escherichia coli (strain K12) OX=83333 GN=glpK PE=1 SV=2;sp|C5A093|GLPK_ECOBW Glycerol kinase OS=Escherichia coli (strain K12 / MC4100 / BW2952) OX=595496 GN=glpK PE=3 SV=1;sp|B1XB92|GLPK_ECODH Glycerol kinase OS=Esc	P0A6F3	Glycerol kinase	glpK	0.76324	43.2862	0.70345	41.2956	0.68178	40.5392				14	6	9	4	14	6	9	4	43.8	56.23	761960000	401420000	360540000	204320000	113210000	91101000	284830000	174010000	110820000	123650000	31680000	91972000
sp|P0A6F5|CH60_ECOLI 60 kDa chaperonin OS=Escherichia coli (strain K12) OX=83333 GN=groL PE=1 SV=2;sp|C5A1D5|CH60_ECOBW 60 kDa chaperonin OS=Escherichia coli (strain K12 / MC4100 / BW2952) OX=595496 GN=groL PE=1 SV=1;sp|B1XDP7|CH60_ECODH 60 kDa chaperonin	P0A6F5	60 kDa chaperonin	groL	0.42161	29.6572	0.4684	31.8987	0.50257	33.4474	2.3965	70.5579		37	36	39	38	37	36	39	38	88	57.328	92434000000	65649000000	26784000000	111040000000	74389000000	36650000000	118850000000	77296000000	41552000000	91551000000	26367000000	65184000000
sp|P0A6F9|CH10_ECOLI 10 kDa chaperonin OS=Escherichia coli (strain K12) OX=83333 GN=groS PE=1 SV=1;sp|C5A1D4|CH10_ECOBW 10 kDa chaperonin OS=Escherichia coli (strain K12 / MC4100 / BW2952) OX=595496 GN=groS PE=3 SV=1;sp|B1XDP6|CH10_ECODH 10 kDa chaperonin	P0A6F9	10 kDa chaperonin	groS	0.47051	31.9964	0.51802	34.1247	0.54687	35.3533	2.72	73.1183		8	7	9	8	8	7	9	8	89.7	10.387	12310000000	9199900000	3109800000	13230000000	9401500000	3828000000	14958000000	10224000000	4734800000	19927000000	4978900000	14948000000
sp|P0A6G3|PNCC_ECOLI Nicotinamide-nucleotide amidohydrolase PncC OS=Escherichia coli (strain K12) OX=83333 GN=pncC PE=1 SV=1	P0A6G3	Nicotinamide-nucleotide amidohydrolase PncC	pncC							2.3304	69.9736			2	3	5	1	2	3	5	55.2	17.582	0	0	0	39618000	39618000	0	59368000	59368000	0	360200000	95786000	264420000
sp|P0A6G7|CLPP_ECOLI ATP-dependent Clp protease proteolytic subunit OS=Escherichia coli (strain K12) OX=83333 GN=clpP PE=1 SV=1	P0A6G7	ATP-dependent Clp protease proteolytic subunit	clpP										5	3	3	4	5	3	3	4	43.5	23.186	0	0	0	0	0	0	0	0	0	178990000	36220000	142770000
sp|P0A6H1|CLPX_ECOLI ATP-dependent Clp protease ATP-binding subunit ClpX OS=Escherichia coli (strain K12) OX=83333 GN=clpX PE=1 SV=2;sp|C4ZTJ5|CLPX_ECOBW ATP-dependent Clp protease ATP-binding subunit ClpX OS=Escherichia coli (strain K12 / MC4100 / BW2952)	P0A6H1	ATP-dependent Clp protease ATP-binding subunit ClpX	clpX	0.69143	40.8784	0.74492	42.6908	0.76712	43.4107	3.4829	77.693		26	24	24	18	26	24	24	18	72.2	46.355	15742000000	8696200000	7046200000	14203000000	7699600000	6503700000	15349000000	8507100000	6841500000	6221800000	979810000	5242000000
sp|P0A6H5|HSLU_ECOLI ATP-dependent protease ATPase subunit HslU OS=Escherichia coli (strain K12) OX=83333 GN=hslU PE=1 SV=1;sp|C5A098|HSLU_ECOBW ATP-dependent protease ATPase subunit HslU OS=Escherichia coli (strain K12 / MC4100 / BW2952) OX=595496 GN=hslU	P0A6H5	ATP-dependent protease ATPase subunit HslU	hslU	0.46863	31.9093	0.50897	33.7296	0.53677	34.9285	2.3403	70.0626		24	21	25	18	24	21	25	18	68.6	49.593	5776700000	3993200000	1783500000	5048900000	3421000000	1627900000	5400600000	3732700000	1667900000	2193800000	575890000	1617900000
sp|P0A6I0|KCY_ECOLI Cytidylate kinase OS=Escherichia coli (strain K12) OX=83333 GN=cmk PE=1 SV=1;sp|C4ZQ36|KCY_ECOBW Cytidylate kinase OS=Escherichia coli (strain K12 / MC4100 / BW2952) OX=595496 GN=cmk PE=3 SV=1;sp|B1X850|KCY_ECODH Cytidylate kinase OS=Es	P0A6I0	Cytidylate kinase	cmk	0.56508	36.1055			0.78697	44.0394				4	4	3	7	4	4	3	7	58.6	24.746	595710000	462290000	133420000	384320000	305840000	78480000	684980000	496100000	188880000	454410000	36825000	417580000
sp|P0A6I3|COAA_ECOLI Pantothenate kinase OS=Escherichia coli (strain K12) OX=83333 GN=coaA PE=1 SV=1;sp|C5A0R9|COAA_ECOBW Pantothenate kinase OS=Escherichia coli (strain K12 / MC4100 / BW2952) OX=595496 GN=coaA PE=3 SV=1;sp|B1XBY1|COAA_ECODH Pantothenate k	P0A6I3	Pantothenate kinase	coaA					0.60304	37.6185				5	3	4		5	3	4	1	32.6	36.359	295850000	288540000	7310100	173280000	163830000	9456500	814590000	483640000	330950000	12791000	0	12791000
sp|P0A6I6|COAD_ECOLI Phosphopantetheine adenylyltransferase OS=Escherichia coli (strain K12) OX=83333 GN=coaD PE=1 SV=1;sp|C4ZXM6|COAD_ECOBW Phosphopantetheine adenylyltransferase OS=Escherichia coli (strain K12 / MC4100 / BW2952) OX=595496 GN=coaD PE=3 SV	P0A6I6	Phosphopantetheine adenylyltransferase	coaD													2	0	0	0	2	18.2	17.836	0	0	0	0	0	0	0	0	0	60860000	9855700	51004000
sp|P0A6J1|CYSC_ECOLI Adenylyl-sulfate kinase OS=Escherichia coli (strain K12) OX=83333 GN=cysC PE=1 SV=2;sp|C4ZZQ4|CYSC_ECOBW Adenylyl-sulfate kinase OS=Escherichia coli (strain K12 / MC4100 / BW2952) OX=595496 GN=cysC PE=3 SV=1;sp|B1XCS6|CYSC_ECODH Adenyl	P0A6J1	Adenylyl-sulfate kinase	cysC	0.59367	37.2518			0.60526	37.7048	1.9069	65.5991		4	4	6	3	4	4	6	3	49.3	22.321	552550000	370060000	182490000	175950000	129180000	46768000	678440000	350330000	328110000	78519000	28203000	50316000
sp|P0A6J5|DADA_ECOLI D-amino acid dehydrogenase OS=Escherichia coli (strain K12) OX=83333 GN=dadA PE=1 SV=1;sp|C4ZTN0|DADA_ECOBW D-amino acid dehydrogenase OS=Escherichia coli (strain K12 / MC4100 / BW2952) OX=595496 GN=dadA PE=3 SV=1;sp|B1XA76|DADA_ECODH	P0A6J5	D-amino acid dehydrogenase	dadA							4.5114	81.8558		4	4	4	4	4	4	4	4	21.3	47.607	56668000	22226000	34443000	57813000	22377000	35436000	50888000	20923000	29965000	107090000	22733000	84352000
sp|P0A6J8|DDLA_ECOLI D-alanine--D-alanine ligase A OS=Escherichia coli (strain K12) OX=83333 GN=ddlA PE=3 SV=1	P0A6J8	D-alanine--D-alanine ligase A	ddlA	0.31134	23.7421	0.34585	25.6975	0.36703	26.8487	2.6898	72.8983		10	7	6	6	10	7	6	6	38.2	39.315	508980000	419380000	89597000	589270000	448340000	140930000	371070000	293550000	77517000	751640000	150270000	601370000
sp|P0A6K1|DAPF_ECOLI Diaminopimelate epimerase OS=Escherichia coli (strain K12) OX=83333 GN=dapF PE=1 SV=1;sp|C4ZZ73|DAPF_ECOBW Diaminopimelate epimerase OS=Escherichia coli (strain K12 / MC4100 / BW2952) OX=595496 GN=dapF PE=3 SV=1;sp|B1XAH6|DAPF_ECODH Di	P0A6K1	Diaminopimelate epimerase	dapF										2				2	1	1	0	14.2	30.208	0	0	0	0	0	0	0	0	0	0	0	0
sp|P0A6K3|DEF_ECOLI Peptide deformylase OS=Escherichia coli (strain K12) OX=83333 GN=def PE=1 SV=2;sp|C4ZUE1|DEF_ECOBW Peptide deformylase OS=Escherichia coli (strain K12 / MC4100 / BW2952) OX=595496 GN=def PE=3 SV=1;sp|B1X6D9|DEF_ECODH Peptide deformylase	P0A6K3	Peptide deformylase	def			0.61416	38.0483			3.0059	75.0368		3	3	4	6	3	3	4	6	39.6	19.328	97481000	50521000	46960000	127760000	80698000	47063000	106840000	84131000	22710000	368280000	84048000	284230000
sp|P0A6K6|DEOB_ECOLI Phosphopentomutase OS=Escherichia coli (strain K12) OX=83333 GN=deoB PE=1 SV=1;sp|C4ZT65|DEOB_ECOBW Phosphopentomutase OS=Escherichia coli (strain K12 / MC4100 / BW2952) OX=595496 GN=deoB PE=3 SV=1;sp|B1XFJ3|DEOB_ECODH Phosphopentomuta	P0A6K6	Phosphopentomutase	deoB	0.7013	41.2214	0.74916	42.8297	0.72684	42.0908	3.6015	78.268		7	8	8	15	7	8	8	15	51.6	44.369	884360000	568890000	315470000	1063800000	569860000	493940000	1428100000	757490000	670650000	5312700000	936190000	4376500000
sp|P0A6L0|DEOC_ECOLI Deoxyribose-phosphate aldolase OS=Escherichia coli (strain K12) OX=83333 GN=deoC PE=1 SV=1;sp|C4ZT63|DEOC_ECOBW Deoxyribose-phosphate aldolase OS=Escherichia coli (strain K12 / MC4100 / BW2952) OX=595496 GN=deoC PE=3 SV=1;sp|B1XFJ1|DEO	P0A6L0	Deoxyribose-phosphate aldolase	deoC	0.64217	39.105			0.61794	38.193	3.3827	77.183		6	5	8	12	6	5	8	12	58.3	27.733	289000000	175690000	113310000	258000000	154160000	103830000	452670000	275120000	177550000	1744200000	391610000	1352600000
sp|P0A6L2|DAPA_ECOLI 4-hydroxy-tetrahydrodipicolinate synthase OS=Escherichia coli (strain K12) OX=83333 GN=dapA PE=1 SV=1	P0A6L2	4-hydroxy-tetrahydrodipicolinate synthase	dapA	0.43282	30.2076	0.49424	33.0763	0.45632	31.3338	2.517	71.5667		7	8	8	10	7	8	8	10	46.6	31.27	708360000	498450000	209910000	914020000	627300000	286720000	948530000	675900000	272630000	1404800000	405670000	999100000
sp|P0A6L9|HSCB_ECOLI Co-chaperone protein HscB OS=Escherichia coli (strain K12) OX=83333 GN=hscB PE=1 SV=1;sp|C4ZXA2|HSCB_ECOBW Co-chaperone protein HscB OS=Escherichia coli (strain K12 / MC4100 / BW2952) OX=595496 GN=hscB PE=3 SV=1;sp|B1XB02|HSCB_ECODH Co	P0A6L9	Co-chaperone protein HscB	hscB							3.2982	76.7344					6	1	1	1	6	41.5	20.137	248910000	156360000	92550000	207990000	125480000	82501000	1078600000	655620000	422980000	169070000	33667000	135400000
sp|P0A6M4|DTD_ECOLI D-aminoacyl-tRNA deacylase OS=Escherichia coli (strain K12) OX=83333 GN=dtd PE=1 SV=1;sp|C5A055|DTD_ECOBW D-aminoacyl-tRNA deacylase OS=Escherichia coli (strain K12 / MC4100 / BW2952) OX=595496 GN=dtd PE=3 SV=1;sp|B1XB55|DTD_ECODH D-ami	P0A6M4	D-aminoacyl-tRNA deacylase	dtd										2	2	2	4	2	2	2	4	31	15.95	0	0	0	0	0	0	0	0	0	65939000	0	65939000
sp|P0A6M8|EFG_ECOLI Elongation factor G OS=Escherichia coli (strain K12) OX=83333 GN=fusA PE=1 SV=2;sp|C4ZUJ5|EFG_ECOBW Elongation factor G OS=Escherichia coli (strain K12 / MC4100 / BW2952) OX=595496 GN=fusA PE=3 SV=1;sp|B1X6J0|EFG_ECODH Elongation factor	P0A6M8	Elongation factor G	fusA	0.38273	27.6793	0.44851	30.9635	0.45017	31.0426	2.2434	69.1682		45	44	45	52	45	44	45	52	78	77.58	52012000000	38138000000	13874000000	46861000000	32751000000	14110000000	54463000000	37619000000	16844000000	58319000000	16162000000	42157000000
sp|P0A6N4|EFP_ECOLI Elongation factor P OS=Escherichia coli (strain K12) OX=83333 GN=efp PE=1 SV=2;sp|C5A1D9|EFP_ECOBW Elongation factor P OS=Escherichia coli (strain K12 / MC4100 / BW2952) OX=595496 GN=efp PE=3 SV=1;sp|B1XDQ0|EFP_ECODH Elongation factor P	P0A6N4	Elongation factor P	efp	0.45127	31.0948	0.49847	33.2653	0.49194	32.9732	2.5528	71.8532		7	6	5	7	7	6	5	7	38.3	20.591	3624700000	2592400000	1032300000	3398500000	2279000000	1119500000	4097500000	2675300000	1422200000	9717800000	2286300000	7431500000
sp|P0A6N8|EFPL_ECOLI Elongation factor P-like protein OS=Escherichia coli (strain K12) OX=83333 GN=yeiP PE=1 SV=1;sp|B1X869|EFPL_ECODH Elongation factor P-like protein OS=Escherichia coli (strain K12 / DH10B) OX=316385 GN=yeiP PE=3 SV=1	P0A6N8	Elongation factor P-like protein	yeiP										2	2	2	7	2	2	2	7	47.4	21.532	0	0	0	308570000	215830000	92737000	302260000	198080000	104180000	809880000	114340000	695540000
sp|P0A6P1|EFTS_ECOLI Elongation factor Ts OS=Escherichia coli (strain K12) OX=83333 GN=tsf PE=1 SV=2;sp|C4ZRR2|EFTS_ECOBW Elongation factor Ts OS=Escherichia coli (strain K12 / MC4100 / BW2952) OX=595496 GN=tsf PE=3 SV=1;sp|B1XD39|EFTS_ECODH Elongation fac	P0A6P1	Elongation factor Ts	tsf	0.45574	31.3064	0.4597	31.4928	0.46297	31.6459	2.4772	71.2412		20	20	22	23	20	20	22	23	78.8	30.423	15276000000	11031000000	4245500000	14254000000	10187000000	4067500000	22670000000	15064000000	7605600000	31177000000	7126200000	24051000000
sp|P0A6P5|DER_ECOLI GTPase Der OS=Escherichia coli (strain K12) OX=83333 GN=der PE=1 SV=1;sp|C4ZX86|DER_ECOBW GTPase Der OS=Escherichia coli (strain K12 / MC4100 / BW2952) OX=595496 GN=der PE=3 SV=1;sp|B1XAY6|DER_ECODH GTPase Der OS=Escherichia coli (strai	P0A6P5	GTPase Der	der	0.42865	30.0038	0.45235	31.1461	0.45361	31.2058	2.7069	73.0233		19	16	17	13	19	16	17	13	48.6	55.035	3965500000	2690500000	1275000000	2650700000	1897400000	753360000	2562200000	1825100000	737140000	945800000	221230000	724570000
sp|P0A6P7|ENGB_ECOLI Probable GTP-binding protein EngB OS=Escherichia coli (strain K12) OX=83333 GN=engB PE=1 SV=1;sp|C5A033|ENGB_ECOBW Probable GTP-binding protein EngB OS=Escherichia coli (strain K12 / MC4100 / BW2952) OX=595496 GN=engB PE=3 SV=1	P0A6P7	Probable GTP-binding protein EngB	engB	0.41397	29.2771	0.47623	32.2599	0.47327	32.1238	2.4546	71.0531		6	6	7	7	6	6	7	7	50	23.561	607900000	386300000	221600000	765080000	560520000	204560000	1048200000	713950000	334240000	1340200000	365300000	974920000
sp|P0A6P9|ENO_ECOLI Enolase OS=Escherichia coli (strain K12) OX=83333 GN=eno PE=1 SV=2;sp|C4ZZT2|ENO_ECOBW Enolase OS=Escherichia coli (strain K12 / MC4100 / BW2952) OX=595496 GN=eno PE=3 SV=1;sp|B1XDI9|ENO_ECODH Enolase OS=Escherichia coli (strain K12 / D	P0A6P9	Enolase	eno	0.36083	26.5154	0.38529	27.8129	0.38199	27.6406	2.7446	73.2949		22	23	22	26	22	23	22	26	79.6	45.654	71421000000	51045000000	20376000000	86241000000	60261000000	25980000000	82626000000	58191000000	24435000000	164350000000	42503000000	121850000000
sp|P0A6R3|FIS_ECOLI DNA-binding protein Fis OS=Escherichia coli (strain K12) OX=83333 GN=fis PE=1 SV=1;sp|C4ZSZ7|FIS_ECOBW DNA-binding protein Fis OS=Escherichia coli (strain K12 / MC4100 / BW2952) OX=595496 GN=fis PE=3 SV=1;sp|B1XHN0|FIS_ECODH DNA-binding	P0A6R3	DNA-binding protein Fis	fis							4.1836	80.7084					5	1	1	1	5	45.9	11.24	83312000	40109000	43203000	70651000	28964000	41687000	60559000	26972000	33587000	257540000	31420000	226120000
sp|P0A6T1|G6PI_ECOLI Glucose-6-phosphate isomerase OS=Escherichia coli (strain K12) OX=83333 GN=pgi PE=1 SV=1;sp|C5A0W2|G6PI_ECOBW Glucose-6-phosphate isomerase OS=Escherichia coli (strain K12 / MC4100 / BW2952) OX=595496 GN=pgi PE=3 SV=1;sp|B1XC24|G6PI_EC	P0A6T1	Glucose-6-phosphate isomerase	pgi	0.60604	37.7351	0.57076	36.3366	0.56189	35.975	2.8083	73.7416		22	23	24	31	21	22	23	30	68.1	61.529	9533400000	6130700000	3402700000	13401000000	8257600000	5143700000	13316000000	8490700000	4825300000	19572000000	3872800000	15699000000
sp|P0A6T3|GAL1_ECOLI Galactokinase OS=Escherichia coli (strain K12) OX=83333 GN=galK PE=1 SV=2;sp|C4ZXS8|GAL1_ECOBW Galactokinase OS=Escherichia coli (strain K12 / MC4100 / BW2952) OX=595496 GN=galK PE=3 SV=1	P0A6T3	Galactokinase	galK										2			4	2	0	1	4	14.7	41.442	82196000	82196000	0	0	0	0	77604000	46056000	31548000	170870000	55341000	115530000
sp|P0A6T5|GCH1_ECOLI GTP cyclohydrolase 1 OS=Escherichia coli (strain K12) OX=83333 GN=folE PE=1 SV=2;sp|C4ZU03|GCH1_ECOBW GTP cyclohydrolase 1 OS=Escherichia coli (strain K12 / MC4100 / BW2952) OX=595496 GN=folE PE=3 SV=1;sp|B1X7P1|GCH1_ECODH GTP cyclohyd	P0A6T5	GTP cyclohydrolase 1	folE	0.30659	23.4649	0.36296	26.6303	0.35391	26.1398	2.7422	73.2778		8	8	8	11	8	8	8	11	50	24.83	4060500000	3318600000	741820000	4222000000	3141400000	1080600000	4208100000	3189400000	1018700000	11430000000	3047300000	8382600000
sp|P0A6T9|GCSH_ECOLI Glycine cleavage system H protein OS=Escherichia coli (strain K12) OX=83333 GN=gcvH PE=1 SV=2;sp|C5A0H6|GCSH_ECOBW Glycine cleavage system H protein OS=Escherichia coli (strain K12 / MC4100 / BW2952) OX=595496 GN=gcvH PE=3 SV=1;sp|B1XE	P0A6T9	Glycine cleavage system H protein	gcvH							2.1592	68.3464			2	2	3	1	2	2	3	25.6	13.811	0	0	0	12948000	12948000	0	19019000	19019000	0	125350000	40284000	85067000
sp|P0A6U3|MNMG_ECOLI tRNA uridine 5-carboxymethylaminomethyl modification enzyme MnmG OS=Escherichia coli (strain K12) OX=83333 GN=mnmG PE=1 SV=1;sp|C4ZZ19|MNMG_ECOBW tRNA uridine 5-carboxymethylaminomethyl modification enzyme MnmG OS=Escherichia coli (str	P0A6U3	tRNA uridine 5-carboxymethylaminomethyl modification enzyme MnmG	mnmG	0.66096	39.7939	0.76561	43.3624	0.80471	44.5894				13	9	11	6	13	9	11	6	36.7	69.52	662770000	396880000	265890000	353560000	207450000	146110000	834440000	408070000	426370000	78261000	0	78261000
sp|P0A6U5|RSMG_ECOLI Ribosomal RNA small subunit methyltransferase G OS=Escherichia coli (strain K12) OX=83333 GN=rsmG PE=1 SV=1;sp|C4ZZ18|RSMG_ECOBW Ribosomal RNA small subunit methyltransferase G OS=Escherichia coli (strain K12 / MC4100 / BW2952) OX=5954	P0A6U5	Ribosomal RNA small subunit methyltransferase G	rsmG	0.44847	30.9616	0.49491	33.1063	0.49978	33.3236	2.0549	67.2657		5	5	5	5	5	5	5	5	49.8	23.431	374830000	308220000	66607000	223010000	147380000	75637000	198460000	126450000	72004000	77745000	31275000	46470000
sp|P0A6U8|GLGA_ECOLI Glycogen synthase OS=Escherichia coli (strain K12) OX=83333 GN=glgA PE=1 SV=1;sp|C4ZVX9|GLGA_ECOBW Glycogen synthase OS=Escherichia coli (strain K12 / MC4100 / BW2952) OX=595496 GN=glgA PE=3 SV=1;sp|B1X774|GLGA_ECODH Glycogen synthase	P0A6U8	Glycogen synthase	glgA	0.49512	33.1157	0.49509	33.1144	0.45029	31.0483	3.6546	78.5159		15	15	16	16	15	15	16	16	41.7	52.822	1974800000	1279100000	695690000	1267000000	814200000	452840000	1482900000	856470000	626380000	907350000	45465000	861890000
sp|P0A6V1|GLGC_ECOLI Glucose-1-phosphate adenylyltransferase OS=Escherichia coli (strain K12) OX=83333 GN=glgC PE=1 SV=2;sp|C4ZVY0|GLGC_ECOBW Glucose-1-phosphate adenylyltransferase OS=Escherichia coli (strain K12 / MC4100 / BW2952) OX=595496 GN=glgC PE=3	P0A6V1	Glucose-1-phosphate adenylyltransferase	glgC			0.50974	33.7634	0.51819	34.1321	3.2298	76.3582		10	7	7	6	10	7	7	6	39.2	48.697	415400000	219090000	196300000	731190000	471960000	259230000	509630000	301460000	208180000	1142800000	181000000	961780000
sp|P0A6V8|GLK_ECOLI Glucokinase OS=Escherichia coli (strain K12) OX=83333 GN=glk PE=1 SV=1;sp|C4ZVS5|GLK_ECOBW Glucokinase OS=Escherichia coli (strain K12 / MC4100 / BW2952) OX=595496 GN=glk PE=3 SV=1;sp|B1X9R0|GLK_ECODH Glucokinase OS=Escherichia coli (st	P0A6V8	Glucokinase	glk										2	3	4	3	2	3	4	3	31.2	34.723	66551000	43146000	23405000	85911000	49501000	36410000	60726000	60726000	0	92842000	0	92842000
sp|P0A6W0|GLSA2_ECOLI Glutaminase 2 OS=Escherichia coli (strain K12) OX=83333 GN=glsA2 PE=1 SV=1	P0A6W0	Glutaminase 2	glsA2												2	2	1	1	2	2	14.6	33.515	0	0	0	0	0	0	0	0	0	0	0	0
sp|P0A6W5|GREA_ECOLI Transcription elongation factor GreA OS=Escherichia coli (strain K12) OX=83333 GN=greA PE=1 SV=1	P0A6W5	Transcription elongation factor GreA	greA	0.5764	36.5643	0.59604	37.3449	0.62075	38.3002	2.6478	72.5862		7	7	8	8	7	7	8	8	81.6	17.641	434790000	290570000	144220000	417730000	297610000	120130000	338400000	228460000	109950000	2291700000	642270000	1649400000
sp|P0A6W9|GSH1_ECOLI Glutamate--cysteine ligase OS=Escherichia coli (strain K12) OX=83333 GN=gshA PE=1 SV=1;sp|C4ZYT8|GSH1_ECOBW Glutamate--cysteine ligase OS=Escherichia coli (strain K12 / MC4100 / BW2952) OX=595496 GN=gshA PE=3 SV=1;sp|B1XCM1|GSH1_ECODH	P0A6W9	Glutamate--cysteine ligase	gshA					0.38563	27.8307	2.9215	74.4996		2	3	3	10	2	3	3	10	29.7	58.269	201080000	135330000	65754000	141440000	107420000	34012000	196430000	133580000	62853000	1003600000	304630000	698920000
sp|P0A6X1|HEM1_ECOLI Glutamyl-tRNA reductase OS=Escherichia coli (strain K12) OX=83333 GN=hemA PE=1 SV=1;sp|C4ZTQ1|HEM1_ECOBW Glutamyl-tRNA reductase OS=Escherichia coli (strain K12 / MC4100 / BW2952) OX=595496 GN=hemA PE=3 SV=1;sp|B1XAQ1|HEM1_ECODH Glutam	P0A6X1	Glutamyl-tRNA reductase	hemA	1.0246	50.6075	1.2017	54.5806	1.2993	56.5085				4	3	4		4	3	4	1	16.5	46.306	304880000	152150000	152740000	216370000	102750000	113620000	257450000	123760000	133690000	6268500	0	6268500
sp|P0A6X3|HFQ_ECOLI RNA-binding protein Hfq OS=Escherichia coli (strain K12) OX=83333 GN=hfq PE=1 SV=2;sp|C4ZR49|HFQ_ECOBW RNA-binding protein Hfq OS=Escherichia coli (strain K12 / MC4100 / BW2952) OX=595496 GN=hfq PE=3 SV=1;sp|B1XDS3|HFQ_ECODH RNA-binding	P0A6X3	RNA-binding protein Hfq	hfq	0.48357	32.595	0.48542	32.679	0.47977	32.4219	2.8439	73.9848		4	5	5	5	4	5	5	5	52	11.166	3362800000	2267900000	1094900000	4146600000	2753700000	1393000000	3615700000	2415400000	1200300000	3039400000	791250000	2248200000
sp|P0A6X7|IHFA_ECOLI Integration host factor subunit alpha OS=Escherichia coli (strain K12) OX=83333 GN=ihfA PE=1 SV=1;sp|C4ZYH4|IHFA_ECOBW Integration host factor subunit alpha OS=Escherichia coli (strain K12 / MC4100 / BW2952) OX=595496 GN=ihfA PE=3 SV=1	P0A6X7	Integration host factor subunit alpha	ihfA	0.65835	39.6991	0.63949	39.0054	0.62374	38.4138	3.1543	75.9286		6	6	5	8	6	6	5	8	51.5	11.354	3144800000	1905400000	1239500000	3863200000	2385200000	1478000000	4603500000	2829400000	1774100000	8669700000	2077800000	6591900000
sp|P0A6Y1|IHFB_ECOLI Integration host factor subunit beta OS=Escherichia coli (strain K12) OX=83333 GN=ihfB PE=1 SV=1;sp|C4ZQ38|IHFB_ECOBW Integration host factor subunit beta OS=Escherichia coli (strain K12 / MC4100 / BW2952) OX=595496 GN=ihfB PE=3 SV=1;s	P0A6Y1	Integration host factor subunit beta	ihfB	0.68974	40.8193	0.65931	39.734	0.6495	39.3756	3.4785	77.6711		7	6	7	7	7	6	7	7	83	10.651	2027500000	1190800000	836690000	1382900000	794200000	588710000	2565600000	1524000000	1041700000	3332100000	432280000	2899800000
sp|P0A6Y5|HSLO_ECOLI 33 kDa chaperonin OS=Escherichia coli (strain K12) OX=83333 GN=hslO PE=1 SV=1;sp|C4ZUQ6|HSLO_ECOBW 33 kDa chaperonin OS=Escherichia coli (strain K12 / MC4100 / BW2952) OX=595496 GN=hslO PE=3 SV=1;sp|B1X748|HSLO_ECODH 33 kDa chaperonin	P0A6Y5	33 kDa chaperonin	hslO	0.60198	37.5772	0.56841	36.2412	0.65231	39.4787	2.2774	69.488		4	3	5	5	4	3	5	5	48.6	32.534	919660000	455570000	464090000	448780000	204460000	244320000	586690000	388970000	197720000	426360000	96735000	329630000
sp|P0A6Y8|DNAK_ECOLI Chaperone protein DnaK OS=Escherichia coli (strain K12) OX=83333 GN=dnaK PE=1 SV=2	P0A6Y8	Chaperone protein DnaK	dnaK	0.49318	33.0288	0.5646	36.0859	0.58807	37.0305	2.4746	71.2197		37	42	41	43	37	42	41	43	80.9	69.114	37755000000	26605000000	11150000000	49942000000	32238000000	17704000000	47772000000	30327000000	17445000000	44274000000	11211000000	33063000000
sp|P0A6Z1|HSCA_ECOLI Chaperone protein HscA OS=Escherichia coli (strain K12) OX=83333 GN=hscA PE=1 SV=1;sp|C4ZXA1|HSCA_ECOBW Chaperone protein HscA OS=Escherichia coli (strain K12 / MC4100 / BW2952) OX=595496 GN=hscA PE=3 SV=1;sp|B1XB01|HSCA_ECODH Chaperon	P0A6Z1	Chaperone protein HscA	hscA	0.41626	29.3915	0.46385	31.687	0.44947	31.0093				11	9	9	4	11	9	9	4	29.9	65.652	930100000	777740000	152360000	915000000	705090000	209910000	689760000	563800000	125960000	232790000	57988000	174800000
sp|P0A6Z3|HTPG_ECOLI Chaperone protein HtpG OS=Escherichia coli (strain K12) OX=83333 GN=htpG PE=1 SV=1	P0A6Z3	Chaperone protein HtpG	htpG	0.40071	28.6076	0.47715	32.3021	0.50769	33.6734	2.3812	70.4247		29	23	28	28	29	23	28	28	57.1	71.422	11889000000	8630900000	3258300000	9743900000	6769500000	2974400000	11649000000	7748200000	3900600000	8573400000	2502900000	6070500000
sp|P0A6Z6|NIKR_ECOLI Nickel-responsive regulator OS=Escherichia coli (strain K12) OX=83333 GN=nikR PE=1 SV=1;sp|C4ZW30|NIKR_ECOBW Nickel-responsive regulator OS=Escherichia coli (strain K12 / MC4100 / BW2952) OX=595496 GN=nikR PE=3 SV=1;sp|B1X7T9|NIKR_ECOD	P0A6Z6	Nickel-responsive regulator	nikR											2	2	2	0	2	2	2	33.1	15.094	0	0	0	125380000	84134000	41242000	170770000	92477000	78291000	169690000	55793000	113900000
sp|P0A705|IF2_ECOLI Translation initiation factor IF-2 OS=Escherichia coli (strain K12) OX=83333 GN=infB PE=1 SV=1;sp|C4ZSQ9|IF2_ECOBW Translation initiation factor IF-2 OS=Escherichia coli (strain K12 / MC4100 / BW2952) OX=595496 GN=infB PE=3 SV=1;sp|B1XG	P0A705	Translation initiation factor IF-2	infB	0.39922	28.5316	0.42876	30.0092	0.4413	30.6182	2.2767	69.4815		39	37	35	36	39	37	35	36	68.4	97.349	28623000000	20742000000	7880500000	22692000000	15680000000	7012000000	19733000000	13442000000	6291100000	11268000000	2984700000	8283200000
sp|P0A707|IF3_ECOLI Translation initiation factor IF-3 OS=Escherichia coli (strain K12) OX=83333 GN=infC PE=1 SV=1;sp|C4ZYI0|IF3_ECOBW Translation initiation factor IF-3 OS=Escherichia coli (strain K12 / MC4100 / BW2952) OX=595496 GN=infC PE=3 SV=1	P0A707	Translation initiation factor IF-3;Translation initiation factor IF-3, N-terminally processed;Translation initiation factor IF-3S;Translation initiation factor IF-3	infC	0.37662	27.3583	0.39458	28.2938	0.41174	29.1654	2.6228	72.397		10	12	12	14	10	12	12	14	65.6	20.564	6705900000	5018300000	1687600000	6915200000	5107500000	1807700000	6753100000	5035200000	1717900000	8497600000	2242200000	6255400000
sp|P0A717|KPRS_ECOLI Ribose-phosphate pyrophosphokinase OS=Escherichia coli (strain K12) OX=83333 GN=prs PE=1 SV=2	P0A717	Ribose-phosphate pyrophosphokinase	prs	0.57375	36.4575	0.56779	36.2159			2.5093	71.5043		13	16	15	15	13	16	15	15	56.5	34.218	1519400000	911470000	607900000	1265400000	790850000	474520000	1258800000	784760000	474070000	1600500000	431850000	1168700000
sp|P0A720|KTHY_ECOLI Thymidylate kinase OS=Escherichia coli (strain K12) OX=83333 GN=tmk PE=1 SV=1;sp|C4ZS38|KTHY_ECOBW Thymidylate kinase OS=Escherichia coli (strain K12 / MC4100 / BW2952) OX=595496 GN=tmk PE=3 SV=1;sp|B1XA08|KTHY_ECODH Thymidylate kinase	P0A720	Thymidylate kinase	tmk													2	1	1	1	2	14.6	23.783	0	0	0	0	0	0	0	0	0	51366000	19135000	32231000
sp|P0A722|LPXA_ECOLI Acyl-[acyl-carrier-protein]--UDP-N-acetylglucosamine O-acyltransferase OS=Escherichia coli (strain K12) OX=83333 GN=lpxA PE=1 SV=1;sp|C4ZRS3|LPXA_ECOBW Acyl-[acyl-carrier-protein]--UDP-N-acetylglucosamine O-acyltransferase OS=Escherich	P0A722	Acyl-[acyl-carrier-protein]--UDP-N-acetylglucosamine O-acyltransferase	lpxA	0.4829	32.5646								5	3	4	5	5	3	4	5	40.1	28.08	525500000	392660000	132840000	47733000	47733000	0	264470000	264470000	0	307470000	25474000	282000000
sp|P0A729|YCEF_ECOLI Maf-like protein YceF OS=Escherichia coli (strain K12) OX=83333 GN=yceF PE=1 SV=1	P0A729	Maf-like protein YceF	yceF							2.8901	74.2937		6	3	4	5	6	3	4	5	38.1	21.691	298420000	283390000	15031000	113730000	71594000	42135000	112560000	67810000	44749000	304770000	78905000	225860000
sp|P0A731|MGSA_ECOLI Methylglyoxal synthase OS=Escherichia coli (strain K12) OX=83333 GN=mgsA PE=1 SV=1;sp|C4ZQ89|MGSA_ECOBW Methylglyoxal synthase OS=Escherichia coli (strain K12 / MC4100 / BW2952) OX=595496 GN=mgsA PE=3 SV=1;sp|B1X8R7|MGSA_ECODH Methylgl	P0A731	Methylglyoxal synthase	mgsA	0.51297	33.9048	0.46929	31.9399	0.51444	33.969				3	3	3	3	3	3	3	3	40.1	16.918	157800000	104810000	52984000	183880000	136740000	47141000	196040000	128160000	67877000	351520000	24221000	327300000
sp|P0A734|MINE_ECOLI Cell division topological specificity factor OS=Escherichia coli (strain K12) OX=83333 GN=minE PE=1 SV=1;sp|C4ZS91|MINE_ECOBW Cell division topological specificity factor OS=Escherichia coli (strain K12 / MC4100 / BW2952) OX=595496 GN=	P0A734	Cell division topological specificity factor	minE			0.41687	29.4219	0.56111	35.943	3.0597	75.3676		2	3	5	8	2	3	5	8	89.8	10.235	344000000	344000000	0	220930000	152140000	68789000	584970000	489800000	95179000	1928300000	462290000	1466000000
sp|P0A738|MOAC_ECOLI Cyclic pyranopterin monophosphate synthase OS=Escherichia coli (strain K12) OX=83333 GN=moaC PE=1 SV=2;sp|C4ZXV5|MOAC_ECOBW Cyclic pyranopterin monophosphate synthase OS=Escherichia coli (strain K12 / MC4100 / BW2952) OX=595496 GN=moaC	P0A738	Cyclic pyranopterin monophosphate synthase accessory protein	moaC										2		2	6	2	1	2	6	48.4	17.467	77347000	51656000	25691000	0	0	0	0	0	0	104940000	21766000	83173000
sp|P0A742|MSCL_ECOLI Large-conductance mechanosensitive channel OS=Escherichia coli (strain K12) OX=83333 GN=mscL PE=1 SV=1;sp|C4ZUE5|MSCL_ECOBW Large-conductance mechanosensitive channel OS=Escherichia coli (strain K12 / MC4100 / BW2952) OX=595496 GN=mscL	P0A742	Large-conductance mechanosensitive channel	mscL	0.4806	32.4598	0.46237	31.6179	0.41931	29.5432				3	3	2		3	3	2	1	28.7	14.957	626240000	403430000	222810000	453600000	303600000	150000000	815200000	570740000	244460000	392310000	109640000	282660000
sp|P0A744|MSRA_ECOLI Peptide methionine sulfoxide reductase MsrA OS=Escherichia coli (strain K12) OX=83333 GN=msrA PE=1 SV=2;sp|C4ZR95|MSRA_ECOBW Peptide methionine sulfoxide reductase MsrA OS=Escherichia coli (strain K12 / MC4100 / BW2952) OX=595496 GN=ms	P0A744	Peptide methionine sulfoxide reductase MsrA	msrA										2			2	2	0	1	2	12.7	23.315	0	0	0	0	0	0	0	0	0	0	0	0
sp|P0A749|MURA_ECOLI UDP-N-acetylglucosamine 1-carboxyvinyltransferase OS=Escherichia coli (strain K12) OX=83333 GN=murA PE=1 SV=1;sp|C4ZSS8|MURA_ECOBW UDP-N-acetylglucosamine 1-carboxyvinyltransferase OS=Escherichia coli (strain K12 / MC4100 / BW2952) OX=	P0A749	UDP-N-acetylglucosamine 1-carboxyvinyltransferase	murA	0.43553	30.3393	0.44162	30.6336	0.46166	31.5846	2.2867	69.5743		7	6	8	12	7	6	8	12	45.1	44.817	1424100000	988000000	436070000	1416300000	970390000	445940000	2234300000	1532900000	701450000	3281500000	975890000	2305600000
sp|P0A756|KEFG_ECOLI Glutathione-regulated potassium-efflux system ancillary protein KefG OS=Escherichia coli (strain K12) OX=83333 GN=kefG PE=3 SV=1;sp|C4ZUK7|KEFG_ECOBW Glutathione-regulated potassium-efflux system ancillary protein KefG OS=Escherichia c	P0A756	Glutathione-regulated potassium-efflux system ancillary protein KefG	kefG												2		1	1	2	0	14.1	20.958	0	0	0	0	0	0	0	0	0	0	0	0
sp|P0A759|NAGB_ECOLI Glucosamine-6-phosphate deaminase OS=Escherichia coli (strain K12) OX=83333 GN=nagB PE=1 SV=1;sp|C4ZWF4|NAGB_ECOBW Glucosamine-6-phosphate deaminase OS=Escherichia coli (strain K12 / MC4100 / BW2952) OX=595496 GN=nagB PE=3 SV=1;sp|B1X6	P0A759	Glucosamine-6-phosphate deaminase	nagB	0.8526	46.0218	0.7545	43.0037	0.73969	42.5185	3.2545	76.4955		6	4	9	8	6	4	9	8	54.5	29.774	485830000	298100000	187730000	419710000	267920000	151800000	776270000	444690000	331580000	1534000000	416250000	1117800000
sp|P0A763|NDK_ECOLI Nucleoside diphosphate kinase OS=Escherichia coli (strain K12) OX=83333 GN=ndk PE=1 SV=2;sp|C4ZX93|NDK_ECOBW Nucleoside diphosphate kinase OS=Escherichia coli (strain K12 / MC4100 / BW2952) OX=595496 GN=ndk PE=3 SV=1;sp|B1XAZ3|NDK_ECODH	P0A763	Nucleoside diphosphate kinase	ndk	0.41674	29.4154	0.4724	32.0837	0.47276	32.1003	1.7898	64.1551		8	6	7	8	8	6	7	8	68.5	15.463	1466100000	985160000	480960000	660990000	434540000	226450000	751190000	495460000	255730000	759170000	293500000	465670000
sp|P0A772|NRDI_ECOLI Protein NrdI OS=Escherichia coli (strain K12) OX=83333 GN=nrdI PE=1 SV=1;sp|C4ZYS6|NRDI_ECOBW Protein NrdI OS=Escherichia coli (strain K12 / MC4100 / BW2952) OX=595496 GN=nrdI PE=3 SV=1;sp|B1XCL1|NRDI_ECODH Protein NrdI OS=Escherichia	P0A772	Protein NrdI	nrdI													3	1	0	0	3	40.4	15.34	0	0	0	0	0	0	0	0	0	0	0	0
sp|P0A780|NUSB_ECOLI Transcription antitermination protein NusB OS=Escherichia coli (strain K12) OX=83333 GN=nusB PE=1 SV=1;sp|C4ZTH3|NUSB_ECOBW Transcription antitermination protein NusB OS=Escherichia coli (strain K12 / MC4100 / BW2952) OX=595496 GN=nusB	P0A780	N utilization substance protein B;N utilization substance protein B homolog	nusB			0.44226	30.6644			1.9507	66.1097			2	2	7	0	2	2	7	48.9	15.689	0	0	0	175090000	116120000	58977000	94059000	70057000	24002000	762780000	170610000	592170000
sp|P0A784|ORN_ECOLI Oligoribonuclease OS=Escherichia coli (strain K12) OX=83333 GN=orn PE=1 SV=2	P0A784	Oligoribonuclease	orn										2	3	3	4	2	3	3	4	34.3	20.815	68279000	57625000	10654000	40657000	40657000	0	31474000	22594000	8880100	306180000	94124000	212060000
sp|P0A786|PYRB_ECOLI Aspartate carbamoyltransferase catalytic subunit OS=Escherichia coli (strain K12) OX=83333 GN=pyrB PE=1 SV=2;sp|C4ZRB8|PYRB_ECOBW Aspartate carbamoyltransferase OS=Escherichia coli (strain K12 / MC4100 / BW2952) OX=595496 GN=pyrB PE=3	P0A786	Aspartate carbamoyltransferase catalytic chain;Aspartate carbamoyltransferase	pyrB	0.50166	33.407	0.61449	38.0609	0.61819	38.2026	2.3633	70.2673		19	19	21	18	19	19	21	18	84.6	34.427	33385000000	22321000000	11064000000	34829000000	20465000000	14364000000	40734000000	23651000000	17082000000	32118000000	9257700000	22860000000
sp|P0A790|PAND_ECOLI Aspartate 1-decarboxylase OS=Escherichia coli (strain K12) OX=83333 GN=panD PE=1 SV=1;sp|C4ZRM4|PAND_ECOBW Aspartate 1-decarboxylase OS=Escherichia coli (strain K12 / MC4100 / BW2952) OX=595496 GN=panD PE=3 SV=1;sp|B1XCA6|PAND_ECODH As	P0A790	Aspartate 1-decarboxylase;Aspartate 1-decarboxylase beta chain;Aspartate 1-decarboxylase alpha chain	panD										2	3		4	2	3	1	4	29.4	13.834	0	0	0	21396000	21396000	0	0	0	0	131690000	51309000	80384000
sp|P0A794|PDXJ_ECOLI Pyridoxine 5-phosphate synthase OS=Escherichia coli (strain K12) OX=83333 GN=pdxJ PE=1 SV=2	P0A794	Pyridoxine 5-phosphate synthase	pdxJ	0.46718	31.842	0.46877	31.9158	0.46397	31.6926	2.9501	74.6842		9	12	10	12	9	12	10	12	65	26.384	1339800000	838970000	500810000	1704400000	1189400000	514940000	1288100000	859310000	428780000	2322200000	682880000	1639300000
sp|P0A796|PFKA_ECOLI ATP-dependent 6-phosphofructokinase isozyme 1 OS=Escherichia coli (strain K12) OX=83333 GN=pfkA PE=1 SV=1;sp|C5A083|PFKA_ECOBW ATP-dependent 6-phosphofructokinase isozyme 1 OS=Escherichia coli (strain K12 / MC4100 / BW2952) OX=595496 G	P0A796	ATP-dependent 6-phosphofructokinase isozyme 1	pfkA	0.58162	36.7737	0.5826	36.8128	0.56048	35.9172	3.0186	75.1157		12	14	12	18	12	14	12	18	52.2	34.842	980410000	651950000	328460000	1381300000	900780000	480560000	1653800000	1018700000	635170000	3204800000	746520000	2458200000
sp|P0A799|PGK_ECOLI Phosphoglycerate kinase OS=Escherichia coli (strain K12) OX=83333 GN=pgk PE=1 SV=2	P0A799	Phosphoglycerate kinase	pgk	0.43448	30.2883	0.46721	31.8434	0.4648	31.7313	2.7348	73.2248		19	19	22	26	19	19	22	26	86	41.118	25902000000	17765000000	8136600000	30670000000	20488000000	10182000000	28891000000	19881000000	9009900000	57200000000	13431000000	43769000000
sp|P0A7A2|GPMB_ECOLI Probable phosphoglycerate mutase GpmB OS=Escherichia coli (strain K12) OX=83333 GN=gpmB PE=3 SV=1;sp|C4ZT77|GPMB_ECOBW Probable phosphoglycerate mutase GpmB OS=Escherichia coli (strain K12 / MC4100 / BW2952) OX=595496 GN=gpmB PE=3 SV=1	P0A7A2	Probable phosphoglycerate mutase GpmB	gpmB	0.44015	30.5628								5	4	2	4	5	4	2	4	26.5	24.065	235710000	162870000	72847000	223560000	157570000	65990000	45020000	45020000	0	0	0	0
sp|P0A7A5|PIMT_ECOLI Protein-L-isoaspartate O-methyltransferase OS=Escherichia coli (strain K12) OX=83333 GN=pcm PE=1 SV=2;sp|C4ZZP7|PIMT_ECOBW Protein-L-isoaspartate O-methyltransferase OS=Escherichia coli (strain K12 / MC4100 / BW2952) OX=595496 GN=pcm P	P0A7A5	Protein-L-isoaspartate O-methyltransferase	pcm										4	5	5	2	4	5	5	2	38	23.257	77422000	77422000	0	143190000	109270000	33912000	102880000	102880000	0	47233000	14440000	32793000
sp|P0A7A7|PLSB_ECOLI Glycerol-3-phosphate acyltransferase OS=Escherichia coli (strain K12) OX=83333 GN=plsB PE=1 SV=2;sp|C5A134|PLSB_ECOBW Glycerol-3-phosphate acyltransferase OS=Escherichia coli (strain K12 / MC4100 / BW2952) OX=595496 GN=plsB PE=3 SV=1;s	P0A7A7	Glycerol-3-phosphate acyltransferase	plsB	0.52347	34.3604	0.52777	34.5451	0.55816	35.8217	2.4279	70.8276		24	24	28	11	24	24	28	11	48.5	91.38	3341800000	2162600000	1179200000	5020300000	3245900000	1774400000	4757200000	3051900000	1705300000	1482100000	422130000	1060000000
sp|P0A7A9|IPYR_ECOLI Inorganic pyrophosphatase OS=Escherichia coli (strain K12) OX=83333 GN=ppa PE=1 SV=2	P0A7A9	Inorganic pyrophosphatase	ppa	0.49349	33.0427	0.54765	35.3859	0.52861	34.5811	2.5117	71.5238		6	8	7	11	6	8	7	11	61.9	19.703	8238100000	5510400000	2727700000	8079100000	5203300000	2875900000	8041700000	4355000000	3686700000	16102000000	4273900000	11828000000
sp|P0A7B1|PPK1_ECOLI Polyphosphate kinase OS=Escherichia coli (strain K12) OX=83333 GN=ppk PE=1 SV=2	P0A7B1	Polyphosphate kinase	ppk	0.46936	31.9432	0.52091	34.2499			2.8967	74.3373		12	10	12	14	12	10	12	14	39.2	80.431	540590000	430790000	109800000	265750000	174420000	91337000	311720000	293660000	18056000	270540000	46203000	224330000
sp|P0A7B3|NADK_ECOLI NAD kinase OS=Escherichia coli (strain K12) OX=83333 GN=nadK PE=1 SV=1;sp|C4ZYN2|NADK_ECOBW NAD kinase OS=Escherichia coli (strain K12 / MC4100 / BW2952) OX=595496 GN=nadK PE=3 SV=1;sp|B1XBT5|NADK_ECODH NAD kinase OS=Escherichia coli (	P0A7B3	NAD kinase	nadK	0.53559	34.8785	0.51525	34.0043	0.52418	34.391				3	3	2	2	3	3	2	2	14.7	32.566	255740000	130440000	125290000	169090000	107950000	61133000	90417000	55666000	34751000	131330000	9650100	121680000
sp|P0A7B5|PROB_ECOLI Glutamate 5-kinase OS=Escherichia coli (strain K12) OX=83333 GN=proB PE=1 SV=1;sp|C4ZT99|PROB_ECOBW Glutamate 5-kinase OS=Escherichia coli (strain K12 / MC4100 / BW2952) OX=595496 GN=proB PE=3 SV=1;sp|B1XDY5|PROB_ECODH Glutamate 5-kina	P0A7B5	Glutamate 5-kinase	proB	0.38771	27.9388	0.43604	30.3641	0.40393	28.7714	2.5212	71.6006		10	11	14	9	10	11	14	9	65.9	39.056	1883000000	1517900000	365100000	1951700000	1537200000	414500000	2013100000	1661000000	352040000	845080000	244920000	600170000
sp|P0A7B8|HSLV_ECOLI ATP-dependent protease subunit HslV OS=Escherichia coli (strain K12) OX=83333 GN=hslV PE=1 SV=2;sp|C5A099|HSLV_ECOBW ATP-dependent protease subunit HslV OS=Escherichia coli (strain K12 / MC4100 / BW2952) OX=595496 GN=hslV PE=3 SV=1;sp|	P0A7B8	ATP-dependent protease subunit HslV	hslV			0.55175	35.5566	0.56685	36.1777				5	3	3	4	5	3	3	4	31.2	19.093	455310000	347480000	107830000	743310000	517720000	225590000	1061800000	695820000	365980000	46016000	13040000	32976000
sp|P0A7C2|LEXA_ECOLI LexA repressor OS=Escherichia coli (strain K12) OX=83333 GN=lexA PE=1 SV=1;sp|C5A136|LEXA_ECOBW LexA repressor OS=Escherichia coli (strain K12 / MC4100 / BW2952) OX=595496 GN=lexA PE=3 SV=1;sp|B1XC42|LEXA_ECODH LexA repressor OS=Escher	P0A7C2	LexA repressor	lexA							3.6203	78.3564		2	3		5	2	3	1	5	42.6	22.357	158910000	81260000	77648000	174840000	80859000	93978000	192410000	109380000	83032000	530710000	70996000	459710000
sp|P0A7D1|PTH_ECOLI Peptidyl-tRNA hydrolase OS=Escherichia coli (strain K12) OX=83333 GN=pth PE=1 SV=1;sp|C4ZTP5|PTH_ECOBW Peptidyl-tRNA hydrolase OS=Escherichia coli (strain K12 / MC4100 / BW2952) OX=595496 GN=pth PE=3 SV=1;sp|B1XAP5|PTH_ECODH Peptidyl-tR	P0A7D1	Peptidyl-tRNA hydrolase	pth	0.33003	24.8137	0.38263	27.6741	0.37613	27.3324	2.5901	72.1456		7	4	6	4	7	4	6	4	52.1	21.082	785190000	571880000	213310000	422010000	285390000	136610000	321610000	211120000	110490000	168030000	33239000	134790000
sp|P0A7D4|PURA_ECOLI Adenylosuccinate synthetase OS=Escherichia coli (strain K12) OX=83333 GN=purA PE=1 SV=2;sp|C4ZR54|PURA_ECOBW Adenylosuccinate synthetase OS=Escherichia coli (strain K12 / MC4100 / BW2952) OX=595496 GN=purA PE=3 SV=1;sp|B1XDS8|PURA_ECOD	P0A7D4	Adenylosuccinate synthetase	purA	0.37022	27.019	0.39464	28.2969	0.40463	28.8069	2.5911	72.1534		24	24	25	29	24	24	25	29	73.4	47.344	8135700000	5862000000	2273700000	8205700000	5901900000	2303800000	7560600000	5602500000	1958100000	15833000000	4036800000	11797000000
sp|P0A7D7|PUR7_ECOLI Phosphoribosylaminoimidazole-succinocarboxamide synthase OS=Escherichia coli (strain K12) OX=83333 GN=purC PE=1 SV=1;sp|C4ZX51|PUR7_ECOBW Phosphoribosylaminoimidazole-succinocarboxamide synthase OS=Escherichia coli (strain K12 / MC4100	P0A7D7	Phosphoribosylaminoimidazole-succinocarboxamide synthase	purC	0.35287	26.0831	0.43403	30.2665	0.41633	29.395	2.5152	71.5521		14	12	12	12	14	12	12	12	71.3	26.995	2372000000	1749800000	622230000	1812100000	1288100000	523950000	2551300000	1751200000	800150000	5111600000	1082300000	4029300000
sp|P0A7E1|PYRD_ECOLI Dihydroorotate dehydrogenase (quinone) OS=Escherichia coli (strain K12) OX=83333 GN=pyrD PE=1 SV=1;sp|C4ZQ71|PYRD_ECOBW Dihydroorotate dehydrogenase (quinone) OS=Escherichia coli (strain K12 / MC4100 / BW2952) OX=595496 GN=pyrD PE=3 SV	P0A7E1	Dihydroorotate dehydrogenase (quinone)	pyrD	0.60177	37.5691	0.76102	43.2147	0.83379	45.4681	2.0199	66.8863		24	26	29	10	24	26	29	10	92.3	36.774	10868000000	6855800000	4012400000	13064000000	6932300000	6131700000	14217000000	7327400000	6889300000	1868600000	578760000	1289800000
sp|P0A7E5|PYRG_ECOLI CTP synthase OS=Escherichia coli (strain K12) OX=83333 GN=pyrG PE=1 SV=2;sp|C4ZZT3|PYRG_ECOBW CTP synthase OS=Escherichia coli (strain K12 / MC4100 / BW2952) OX=595496 GN=pyrG PE=3 SV=1;sp|B1XDJ0|PYRG_ECODH CTP synthase OS=Escherichia	P0A7E5	CTP synthase	pyrG	0.53002	34.6414	0.59461	37.2887	0.59556	37.3261	2.2994	69.6915		23	20	23	24	23	20	23	24	59.4	60.373	7481300000	5033100000	2448300000	5215900000	3517300000	1698600000	6024300000	4070200000	1954100000	3492100000	1433800000	2058300000
sp|P0A7E9|PYRH_ECOLI Uridylate kinase OS=Escherichia coli (strain K12) OX=83333 GN=pyrH PE=1 SV=2	P0A7E9	Uridylate kinase	pyrH	0.60929	37.8608	0.55069	35.5126	0.57027	36.3167	2.2094	68.8415		6	6	5	5	6	6	5	5	43.6	25.97	602550000	391790000	210770000	403600000	264000000	139590000	415710000	262360000	153350000	203240000	57021000	146220000
sp|P0A7F3|PYRI_ECOLI Aspartate carbamoyltransferase regulatory chain OS=Escherichia coli (strain K12) OX=83333 GN=pyrI PE=1 SV=2;sp|C4ZRB7|PYRI_ECOBW Aspartate carbamoyltransferase regulatory chain OS=Escherichia coli (strain K12 / MC4100 / BW2952) OX=5954	P0A7F3	Aspartate carbamoyltransferase regulatory chain	pyrI	0.55471	35.6793	0.65867	39.7107	0.68916	40.799	1.7811	64.043		9	10	10	10	9	10	10	10	85.6	17.12	21925000000	13379000000	8546000000	39749000000	22471000000	17278000000	34120000000	18816000000	15304000000	29582000000	9560700000	20021000000
sp|P0A7F6|SPED_ECOLI S-adenosylmethionine decarboxylase proenzyme OS=Escherichia coli (strain K12) OX=83333 GN=speD PE=1 SV=1;sp|C4ZRL3|SPED_ECOBW S-adenosylmethionine decarboxylase proenzyme OS=Escherichia coli (strain K12 / MC4100 / BW2952) OX=595496 GN=	P0A7F6	S-adenosylmethionine decarboxylase proenzyme;S-adenosylmethionine decarboxylase beta chain;S-adenosylmethionine decarboxylase alpha chain	speD	0.36855	26.93	0.40506	28.8287	0.46103	31.5551	2.0526	67.241		3	4	4	6	3	4	4	6	33.3	30.384	660630000	489110000	171520000	932810000	698350000	234450000	661700000	346850000	314850000	953320000	181950000	771360000
sp|P0A7F9|QUEA_ECOLI S-adenosylmethionine:tRNA ribosyltransferase-isomerase OS=Escherichia coli (strain K12) OX=83333 GN=queA PE=1 SV=1;sp|C4ZTG2|QUEA_ECOBW S-adenosylmethionine:tRNA ribosyltransferase-isomerase OS=Escherichia coli (strain K12 / MC4100 / B	P0A7F9	S-adenosylmethionine:tRNA ribosyltransferase-isomerase	queA										2	3	3	3	2	3	3	3	14	39.43	77643000	77643000	0	48210000	48210000	0	84023000	55492000	28531000	105650000	35312000	70339000
sp|P0A7G2|RBFA_ECOLI 30S ribosome-binding factor OS=Escherichia coli (strain K12) OX=83333 GN=rbfA PE=1 SV=2;sp|C4ZSQ8|RBFA_ECOBW Ribosome-binding factor A OS=Escherichia coli (strain K12 / MC4100 / BW2952) OX=595496 GN=rbfA PE=3 SV=1;sp|B1XGX9|RBFA_ECODH	P0A7G2	Ribosome-binding factor A	rbfA	0.4261	29.8787	0.47759	32.3222	0.49712	33.2051	2.5121	71.527		6	5	5	5	6	5	5	5	60.9	15.154	843050000	578800000	264240000	688860000	480790000	208070000	783720000	526600000	257120000	902040000	221050000	680980000
sp|P0A7G6|RECA_ECOLI Protein RecA OS=Escherichia coli (strain K12) OX=83333 GN=recA PE=1 SV=2;sp|C4ZYU4|RECA_ECOBW Protein RecA OS=Escherichia coli (strain K12 / MC4100 / BW2952) OX=595496 GN=recA PE=3 SV=1	P0A7G6	Protein RecA	recA	0.50288	33.4611	0.52992	34.6371	0.54414	35.239	2.8735	74.1836		13	13	15	12	13	13	15	12	51.8	37.973	10310000000	7370000000	2939900000	6689000000	4791600000	1897400000	8801700000	6288200000	2513500000	3949600000	1412100000	2537500000
sp|P0A7H0|RECF_ECOLI DNA replication and repair protein RecF OS=Escherichia coli (strain K12) OX=83333 GN=recF PE=1 SV=2;sp|C4ZYX7|RECF_ECOBW DNA replication and repair protein RecF OS=Escherichia coli (strain K12 / MC4100 / BW2952) OX=595496 GN=recF PE=3	P0A7H0	DNA replication and repair protein RecF	recF										2				2	1	1	0	7.8	40.514	65390000	41136000	24255000	50720000	31342000	19378000	0	0	0	0	0	0
sp|P0A7I0|RF1_ECOLI Peptide chain release factor RF1 OS=Escherichia coli (strain K12) OX=83333 GN=prfA PE=1 SV=1;sp|C4ZTQ2|RF1_ECOBW Peptide chain release factor 1 OS=Escherichia coli (strain K12 / MC4100 / BW2952) OX=595496 GN=prfA PE=3 SV=1;sp|B1XAQ2|RF1	P0A7I0	Peptide chain release factor 1	prfA													4	1	1	1	4	21.7	40.517	0	0	0	0	0	0	0	0	0	17253000	0	17253000
sp|P0A7I4|RF3_ECOLI Peptide chain release factor RF3 OS=Escherichia coli (strain K12) OX=83333 GN=prfC PE=1 SV=2;sp|C4ZT56|RF3_ECOBW Peptide chain release factor 3 OS=Escherichia coli (strain K12 / MC4100 / BW2952) OX=595496 GN=prfC PE=3 SV=1;sp|B1XFI4|RF3	P0A7I4	Peptide chain release factor 3	prfC	0.42378	29.7644	0.51008	33.7783	0.55765	35.8007	1.8485	64.8938		7	9	8	9	7	9	8	9	27.6	59.573	969730000	691130000	278590000	737940000	495150000	242790000	780170000	496210000	283960000	1034200000	322120000	712090000
sp|P0A7J0|RIBB_ECOLI 3,4-dihydroxy-2-butanone 4-phosphate synthase OS=Escherichia coli (strain K12) OX=83333 GN=ribB PE=1 SV=1;sp|C4ZQV9|RIBB_ECOBW 3,4-dihydroxy-2-butanone 4-phosphate synthase OS=Escherichia coli (strain K12 / MC4100 / BW2952) OX=595496 G	P0A7J0	3,4-dihydroxy-2-butanone 4-phosphate synthase	ribB													2	0	0	0	2	10.6	23.353	0	0	0	0	0	0	0	0	0	0	0	0
sp|P0A7J3|RL10_ECOLI 50S ribosomal protein L10 OS=Escherichia coli (strain K12) OX=83333 GN=rplJ PE=1 SV=2;sp|C5A0S5|RL10_ECOBW 50S ribosomal protein L10 OS=Escherichia coli (strain K12 / MC4100 / BW2952) OX=595496 GN=rplJ PE=3 SV=1;sp|B1XBY7|RL10_ECODH 50	P0A7J3	50S ribosomal protein L10	rplJ	0.46044	31.5275	0.53313	34.774	0.52603	34.4705	2.2479	69.2109		14	14	14	17	14	14	14	17	79.4	17.711	12629000000	8459800000	4168700000	17801000000	11307000000	6494000000	17533000000	11189000000	6343700000	12912000000	3859700000	9052200000
sp|P0A7J7|RL11_ECOLI 50S ribosomal protein L11 OS=Escherichia coli (strain K12) OX=83333 GN=rplK PE=1 SV=2;sp|C5A0S3|RL11_ECOBW 50S ribosomal protein L11 OS=Escherichia coli (strain K12 / MC4100 / BW2952) OX=595496 GN=rplK PE=3 SV=1;sp|B1XBY5|RL11_ECODH 50	P0A7J7	50S ribosomal protein L11	rplK	0.43103	30.1203	0.50501	33.5553	0.49142	32.9498	2.1963	68.7138		8	8	8	9	8	8	8	9	66.9	14.875	15000000000	10250000000	4750400000	17219000000	11412000000	5807400000	18153000000	11845000000	6308400000	14735000000	4292300000	10443000000
sp|P0A7K2|RL7_ECOLI 50S ribosomal protein L7/L12 OS=Escherichia coli (strain K12) OX=83333 GN=rplL PE=1 SV=2;sp|C5A0S6|RL7_ECOBW 50S ribosomal protein L7/L12 OS=Escherichia coli (strain K12 / MC4100 / BW2952) OX=595496 GN=rplL PE=3 SV=1;sp|B1XBY8|RL7_ECODH	P0A7K2	50S ribosomal protein L7/L12	rplL	0.45275	31.165	0.50414	33.5168	0.50939	33.7481	2.1998	68.748		9	11	10	10	9	11	10	10	84.3	12.295	62255000000	45897000000	16358000000	64941000000	46421000000	18520000000	65984000000	47523000000	18461000000	46099000000	13445000000	32654000000
sp|P0A7K6|RL19_ECOLI 50S ribosomal protein L19 OS=Escherichia coli (strain K12) OX=83333 GN=rplS PE=1 SV=2;sp|C4ZYM4|RL19_ECOBW 50S ribosomal protein L19 OS=Escherichia coli (strain K12 / MC4100 / BW2952) OX=595496 GN=rplS PE=3 SV=1;sp|B1XBS8|RL19_ECODH 50	P0A7K6	50S ribosomal protein L19	rplS	0.41268	29.2126	0.4986	33.2711	0.49601	33.1555	2.3416	70.0742		11	10	12	12	11	10	12	12	79.1	13.133	27479000000	18747000000	8731800000	29077000000	19130000000	9947000000	29009000000	18676000000	10333000000	23164000000	6831300000	16332000000
sp|P0A7L0|RL1_ECOLI 50S ribosomal protein L1 OS=Escherichia coli (strain K12) OX=83333 GN=rplA PE=1 SV=2;sp|C5A0S4|RL1_ECOBW 50S ribosomal protein L1 OS=Escherichia coli (strain K12 / MC4100 / BW2952) OX=595496 GN=rplA PE=3 SV=1;sp|B1XBY6|RL1_ECODH 50S rib	P0A7L0	50S ribosomal protein L1	rplA	0.45169	31.1148	0.50482	33.5469	0.50252	33.4451	2.2636	69.359		18	21	20	21	18	21	20	21	77.8	24.729	57777000000	38544000000	19234000000	61580000000	39299000000	22281000000	55051000000	38615000000	16436000000	42214000000	11703000000	30511000000
sp|P0A7L3|RL20_ECOLI 50S ribosomal protein L20 OS=Escherichia coli (strain K12) OX=83333 GN=rplT PE=1 SV=2;sp|C4ZYH8|RL20_ECOBW 50S ribosomal protein L20 OS=Escherichia coli (strain K12 / MC4100 / BW2952) OX=595496 GN=rplT PE=3 SV=1;sp|B1XG23|RL20_ECODH 50	P0A7L3	50S ribosomal protein L20	rplT	0.48175	32.5122	0.52547	34.4464	0.55436	35.6648	2.3116	69.8031		7	6	7	5	7	6	7	5	46.6	13.497	10447000000	6773500000	3673700000	8186700000	5864800000	2321900000	10896000000	6727700000	4168100000	8994400000	2636100000	6358300000
sp|P0A7L8|RL27_ECOLI 50S ribosomal protein L27 OS=Escherichia coli (strain K12) OX=83333 GN=rpmA PE=1 SV=2;sp|C4ZSS4|RL27_ECOBW 50S ribosomal protein L27 OS=Escherichia coli (strain K12 / MC4100 / BW2952) OX=595496 GN=rpmA PE=3 SV=1;sp|B1XHG1|RL27_ECODH 50	P0A7L8	50S ribosomal protein L27	rpmA	1.2295	55.1469	0.59878	37.4523	0.57668	36.5756	3.2502	76.4717		4	5	6	5	4	5	6	5	48.2	9.1244	4345400000	1643200000	2702300000	5359200000	2027200000	3332000000	5640500000	2088600000	3551900000	2111900000	457680000	1654200000
sp|P0A7M2|RL28_ECOLI 50S ribosomal protein L28 OS=Escherichia coli (strain K12) OX=83333 GN=rpmB PE=1 SV=2;sp|C4ZXM9|RL28_ECOBW 50S ribosomal protein L28 OS=Escherichia coli (strain K12 / MC4100 / BW2952) OX=595496 GN=rpmB PE=3 SV=1;sp|B1X971|RL28_ECODH 50	P0A7M2	50S ribosomal protein L28	rpmB	0.44938	31.005	0.5225	34.3186	0.5177	34.1108	2.3273	69.9456		11	8	10	8	11	8	10	8	75.6	9.0064	6064800000	4016800000	2048000000	5490800000	3421300000	2069600000	5744800000	3883300000	1861500000	3633400000	1080000000	2553300000
sp|P0A7M6|RL29_ECOLI 50S ribosomal protein L29 OS=Escherichia coli (strain K12) OX=83333 GN=rpmC PE=1 SV=1;sp|C4ZUG7|RL29_ECOBW 50S ribosomal protein L29 OS=Escherichia coli (strain K12 / MC4100 / BW2952) OX=595496 GN=rpmC PE=3 SV=1;sp|B1X6G4|RL29_ECODH 50	P0A7M6	50S ribosomal protein L29	rpmC	0.42135	29.6444	0.48558	32.6862	0.41659	29.4079	2.3011	69.7071		3	3	3	3	3	3	3	3	55.6	7.2734	9878000000	8523600000	1354300000	10120000000	8487200000	1633100000	11865000000	7710200000	4155100000	7309900000	2279700000	5030200000
sp|P0A7M9|RL31_ECOLI 50S ribosomal protein L31 OS=Escherichia coli (strain K12) OX=83333 GN=rpmE PE=1 SV=1;sp|C5A0A3|RL31_ECOBW 50S ribosomal protein L31 OS=Escherichia coli (strain K12 / MC4100 / BW2952) OX=595496 GN=rpmE PE=3 SV=1;sp|B1XBA2|RL31_ECODH 50	P0A7M9	50S ribosomal protein L31	rpmE	0.60982	37.8813	0.68862	40.78	0.79258	44.2145	1.1656	53.8234		7	6	5	4	7	6	5	4	92.9	7.871	6829600000	4371200000	2458400000	6196400000	3659100000	2537300000	5496900000	2949100000	2547700000	829140000	382680000	446470000
sp|P0A7N1|RL31B_ECOLI 50S ribosomal protein L31 type B OS=Escherichia coli (strain K12) OX=83333 GN=ykgM PE=2 SV=1;sp|B1XE39|RL31B_ECODH 50S ribosomal protein L31 type B OS=Escherichia coli (strain K12 / DH10B) OX=316385 GN=rpmE2 PE=3 SV=1	P0A7N1	50S ribosomal protein L31 type B	ykgM;rpmE2	0.010416	1.03086	0.032468	3.1447	0.018788	1.84415	3.225	76.3314		7	5	7	10	7	5	7	10	96.6	9.9201	4278800000	4249700000	29181000	10039000000	9781700000	257510000	12633000000	12402000000	230850000	18676000000	4685500000	13991000000
sp|P0A7N4|RL32_ECOLI 50S ribosomal protein L32 OS=Escherichia coli (strain K12) OX=83333 GN=rpmF PE=1 SV=2;sp|C4ZS29|RL32_ECOBW 50S ribosomal protein L32 OS=Escherichia coli (strain K12 / MC4100 / BW2952) OX=595496 GN=rpmF PE=3 SV=1;sp|B1X9Z9|RL32_ECODH 50	P0A7N4	50S ribosomal protein L32	rpmF	0.45785	31.4058	0.5103	33.788	0.5315	34.7045	2.5885	72.1332		3	3	3	3	3	3	3	3	45.6	6.4463	3495800000	3005900000	489850000	3313700000	2498800000	814910000	3051500000	2250700000	800880000	3068000000	1107300000	1960700000
sp|P0A7N9|RL33_ECOLI 50S ribosomal protein L33 OS=Escherichia coli (strain K12) OX=83333 GN=rpmG PE=1 SV=2;sp|C4ZXM8|RL33_ECOBW 50S ribosomal protein L33 OS=Escherichia coli (strain K12 / MC4100 / BW2952) OX=595496 GN=rpmG PE=3 SV=1;sp|B1X970|RL33_ECODH 50	P0A7N9	50S ribosomal protein L33	rpmG	0.62199	38.3473	0.69707	41.0749	0.72266	41.9502	3.0825	75.5052		3	3	3	3	3	3	3	3	50.9	6.3715	14471000000	8442000000	6028600000	13079000000	7180500000	5898300000	10655000000	5718600000	4936400000	12478000000	2838600000	9639100000
sp|P0A7P5|RL34_ECOLI 50S ribosomal protein L34 OS=Escherichia coli (strain K12) OX=83333 GN=rpmH PE=1 SV=1;sp|C4ZYY0|RL34_ECOBW 50S ribosomal protein L34 OS=Escherichia coli (strain K12 / MC4100 / BW2952) OX=595496 GN=rpmH PE=3 SV=1;sp|B1X9T1|RL34_ECODH 50	P0A7P5	50S ribosomal protein L34	rpmH	0.5026	33.4487	0.57799	36.6282	0.55429	35.6619	2.3942	70.538		2	2	4	2	2	2	4	2	47.8	5.3803	4590800000	3012100000	1578700000	6421200000	3969600000	2451600000	6057700000	3769200000	2288500000	5337000000	1513600000	3823300000
sp|P0A7Q1|RL35_ECOLI 50S ribosomal protein L35 OS=Escherichia coli (strain K12) OX=83333 GN=rpmI PE=1 SV=2;sp|C4ZYH9|RL35_ECOBW 50S ribosomal protein L35 OS=Escherichia coli (strain K12 / MC4100 / BW2952) OX=595496 GN=rpmI PE=3 SV=1;sp|B1XG24|RL35_ECODH 50	P0A7Q1	50S ribosomal protein L35	rpmI	0.56419	36.0691			0.64897	39.3561				2	2	2		2	2	2	1	35.4	7.2888	150090000	96756000	53333000	69512000	36319000	33193000	296530000	167290000	129240000	294430000	83420000	211010000
sp|P0A7R1|RL9_ECOLI 50S ribosomal protein L9 OS=Escherichia coli (strain K12) OX=83333 GN=rplI PE=1 SV=1;sp|C4ZR80|RL9_ECOBW 50S ribosomal protein L9 OS=Escherichia coli (strain K12 / MC4100 / BW2952) OX=595496 GN=rplI PE=3 SV=1;sp|B1XDV3|RL9_ECODH 50S rib	P0A7R1	50S ribosomal protein L9	rplI	0.49736	33.2158	0.54457	35.2571	0.55558	35.7153	2.2684	69.404		14	15	15	17	14	15	15	17	91.9	15.769	33804000000	21907000000	11896000000	37313000000	26212000000	11101000000	39018000000	27169000000	11849000000	29792000000	6671900000	23121000000
sp|P0A7R5|RS10_ECOLI 30S ribosomal protein S10 OS=Escherichia coli (strain K12) OX=83333 GN=rpsJ PE=1 SV=1;sp|C4ZUH6|RS10_ECOBW 30S ribosomal protein S10 OS=Escherichia coli (strain K12 / MC4100 / BW2952) OX=595496 GN=rpsJ PE=3 SV=1;sp|B1X6H2|RS10_ECODH 30	P0A7R5	30S ribosomal protein S10	rpsJ	0.43365	30.248	0.4905	32.9084	0.50084	33.3706	2.2597	69.3223		13	12	10	13	13	12	10	13	75.7	11.735	26102000000	17713000000	8388900000	23595000000	14121000000	9474100000	20642000000	13690000000	6951700000	21826000000	6156100000	15670000000
sp|P0A7R9|RS11_ECOLI 30S ribosomal protein S11 OS=Escherichia coli (strain K12) OX=83333 GN=rpsK PE=1 SV=2;sp|C4ZUF2|RS11_ECOBW 30S ribosomal protein S11 OS=Escherichia coli (strain K12 / MC4100 / BW2952) OX=595496 GN=rpsK PE=3 SV=1;sp|B1X6E9|RS11_ECODH 30	P0A7R9	30S ribosomal protein S11	rpsK	0.47669	32.281	0.53103	34.6845	0.55216	35.5737	2.2073	68.8211		10	10	11	8	10	10	11	8	67.4	13.845	2973100000	2056200000	916840000	2398300000	1665100000	733170000	3211000000	2273700000	937380000	2201600000	569970000	1631600000
sp|P0A7S3|RS12_ECOLI 30S ribosomal protein S12 OS=Escherichia coli (strain K12) OX=83333 GN=rpsL PE=1 SV=2;sp|C4ZUJ7|RS12_ECOBW 30S ribosomal protein S12 OS=Escherichia coli (strain K12 / MC4100 / BW2952) OX=595496 GN=rpsL PE=3 SV=1	P0A7S3	30S ribosomal protein S12	rpsL	0.46647	31.809	0.54479	35.2663	0.5529	35.6044	2.3536	70.1813		6	6	7	6	6	6	7	6	58.1	13.737	2718900000	1627600000	1091300000	2624500000	1484500000	1140000000	4216300000	2701900000	1514500000	4473300000	1300500000	3172800000
sp|P0A7S9|RS13_ECOLI 30S ribosomal protein S13 OS=Escherichia coli (strain K12) OX=83333 GN=rpsM PE=1 SV=2	P0A7S9	30S ribosomal protein S13	rpsM	0.4847	32.6463	0.53546	34.8729	0.53701	34.9386	2.2803	69.515		14	13	14	12	14	13	14	12	79.7	13.099	27308000000	17795000000	9513100000	30769000000	19052000000	11717000000	29795000000	17614000000	12182000000	17902000000	4161100000	13740000000
sp|P0A7T3|RS16_ECOLI 30S ribosomal protein S16 OS=Escherichia coli (strain K12) OX=83333 GN=rpsP PE=1 SV=1;sp|C4ZYM7|RS16_ECOBW 30S ribosomal protein S16 OS=Escherichia coli (strain K12 / MC4100 / BW2952) OX=595496 GN=rpsP PE=3 SV=1;sp|B1XBT1|RS16_ECODH 30	P0A7T3	30S ribosomal protein S16	rpsP	0.43015	30.0773	0.46816	31.8875	0.49418	33.0737	2.4058	70.6383		8	9	9	11	8	9	9	11	89	9.1904	11864000000	8084600000	3779000000	10563000000	6826600000	3736100000	11353000000	7272700000	4080300000	9636900000	1980800000	7656200000
sp|P0A7T7|RS18_ECOLI 30S ribosomal protein S18 OS=Escherichia coli (strain K12) OX=83333 GN=rpsR PE=1 SV=2;sp|C4ZR79|RS18_ECOBW 30S ribosomal protein S18 OS=Escherichia coli (strain K12 / MC4100 / BW2952) OX=595496 GN=rpsR PE=3 SV=1;sp|B1XDV2|RS18_ECODH 30	P0A7T7	30S ribosomal protein S18	rpsR	0.48294	32.5664	0.54151	35.1285	0.61197	37.9641	2.3361	70.0249		6	6	6	5	6	6	6	5	73.3	8.9863	4731600000	2989400000	1742100000	4337800000	2628700000	1709100000	4901800000	2993100000	1908700000	4492100000	1440600000	3051500000
sp|P0A7U3|RS19_ECOLI 30S ribosomal protein S19 OS=Escherichia coli (strain K12) OX=83333 GN=rpsS PE=1 SV=2;sp|C4ZUH1|RS19_ECOBW 30S ribosomal protein S19 OS=Escherichia coli (strain K12 / MC4100 / BW2952) OX=595496 GN=rpsS PE=3 SV=1;sp|B1X6G7|RS19_ECODH 30	P0A7U3	30S ribosomal protein S19	rpsS	0.45038	31.0526	0.50608	33.6025	0.49006	32.8886	2.2218	68.9615		10	10	11	10	10	10	11	10	76.1	10.43	7583400000	4977900000	2605600000	8075200000	5114300000	2960900000	8895300000	5647900000	3247400000	6388000000	1654100000	4733900000
sp|P0A7U7|RS20_ECOLI 30S ribosomal protein S20 OS=Escherichia coli (strain K12) OX=83333 GN=rpsT PE=1 SV=2;sp|C4ZPU9|RS20_ECOBW 30S ribosomal protein S20 OS=Escherichia coli (strain K12 / MC4100 / BW2952) OX=595496 GN=rpsT PE=3 SV=1;sp|B1XBE8|RS20_ECODH 30	P0A7U7	30S ribosomal protein S20	rpsT	0.44795	30.9368	0.51429	33.9625	0.50879	33.7217	2.1791	68.5446		6	4	5	5	6	4	5	5	46	9.6843	10931000000	7260600000	3670000000	11608000000	7501800000	4106400000	12407000000	8972500000	3434600000	16278000000	4751800000	11526000000
sp|P0A7V0|RS2_ECOLI 30S ribosomal protein S2 OS=Escherichia coli (strain K12) OX=83333 GN=rpsB PE=1 SV=2;sp|C4ZRR1|RS2_ECOBW 30S ribosomal protein S2 OS=Escherichia coli (strain K12 / MC4100 / BW2952) OX=595496 GN=rpsB PE=3 SV=1;sp|B1XD38|RS2_ECODH 30S rib	P0A7V0	30S ribosomal protein S2	rpsB	0.50152	33.4008	0.54246	35.1685	0.55231	35.5799	2.3109	69.7967		16	16	18	16	16	16	18	16	82.6	26.743	52849000000	35094000000	17755000000	49004000000	30911000000	18094000000	53806000000	33572000000	20234000000	37724000000	11066000000	26657000000
sp|P0A7V3|RS3_ECOLI 30S ribosomal protein S3 OS=Escherichia coli (strain K12) OX=83333 GN=rpsC PE=1 SV=2;sp|C4ZUG9|RS3_ECOBW 30S ribosomal protein S3 OS=Escherichia coli (strain K12 / MC4100 / BW2952) OX=595496 GN=rpsC PE=3 SV=1	P0A7V3	30S ribosomal protein S3	rpsC	0.41995	29.575	0.51915	34.1737	0.51392	33.9463	2.2668	69.389		25	25	24	26	25	25	24	26	84.5	25.983	59622000000	40911000000	18711000000	55605000000	36923000000	18682000000	62565000000	42768000000	19797000000	23093000000	6100900000	16992000000
sp|P0A7V8|RS4_ECOLI 30S ribosomal protein S4 OS=Escherichia coli (strain K12) OX=83333 GN=rpsD PE=1 SV=2;sp|C4ZUF1|RS4_ECOBW 30S ribosomal protein S4 OS=Escherichia coli (strain K12 / MC4100 / BW2952) OX=595496 GN=rpsD PE=3 SV=1;sp|B1X6E8|RS4_ECODH 30S rib	P0A7V8	30S ribosomal protein S4	rpsD	0.43908	30.5112	0.51197	33.8611	0.5108	33.8099	2.2647	69.3693		22	23	21	20	22	23	21	20	70.4	23.469	49046000000	33288000000	15758000000	45388000000	29126000000	16262000000	40085000000	25544000000	14541000000	21598000000	5254900000	16343000000
sp|P0A7W1|RS5_ECOLI 30S ribosomal protein S5 OS=Escherichia coli (strain K12) OX=83333 GN=rpsE PE=1 SV=2	P0A7W1	30S ribosomal protein S5	rpsE	0.46989	31.9677	0.51167	33.848	0.51615	34.0435	2.2293	69.0335		13	12	12	15	13	12	12	15	88	17.603	42473000000	27776000000	14697000000	36422000000	23636000000	12786000000	39262000000	25133000000	14130000000	32568000000	9477600000	23090000000
sp|P0A7W7|RS8_ECOLI 30S ribosomal protein S8 OS=Escherichia coli (strain K12) OX=83333 GN=rpsH PE=1 SV=2;sp|C4ZUG1|RS8_ECOBW 30S ribosomal protein S8 OS=Escherichia coli (strain K12 / MC4100 / BW2952) OX=595496 GN=rpsH PE=3 SV=1;sp|B1X6F8|RS8_ECODH 30S rib	P0A7W7	30S ribosomal protein S8	rpsH	0.46285	31.6403	0.47632	32.264	0.48714	32.7568	2.1362	68.1143		10	11	12	13	10	11	12	13	82.3	14.126	5839200000	4432500000	1406600000	6243800000	4441000000	1802800000	6751900000	4840500000	1911400000	7900300000	2166600000	5733700000
sp|P0A7X3|RS9_ECOLI 30S ribosomal protein S9 OS=Escherichia coli (strain K12) OX=83333 GN=rpsI PE=1 SV=2;sp|C4ZSW8|RS9_ECOBW 30S ribosomal protein S9 OS=Escherichia coli (strain K12 / MC4100 / BW2952) OX=595496 GN=rpsI PE=3 SV=1;sp|B1XHK3|RS9_ECODH 30S rib	P0A7X3	30S ribosomal protein S9	rpsI	0.46686	31.8272	0.52851	34.5768	0.52819	34.5631	2.241	69.1453		12	11	12	13	12	11	12	13	79.2	14.856	21759000000	14688000000	7071200000	18718000000	12228000000	6489700000	19503000000	12542000000	6960300000	12905000000	3776800000	9128300000
sp|P0A7X6|RIMM_ECOLI Ribosome maturation factor RimM OS=Escherichia coli (strain K12) OX=83333 GN=rimM PE=1 SV=1;sp|C4ZYM6|RIMM_ECOBW Ribosome maturation factor RimM OS=Escherichia coli (strain K12 / MC4100 / BW2952) OX=595496 GN=rimM PE=3 SV=1;sp|B1XBT0|R	P0A7X6	Ribosome maturation factor RimM	rimM			0.58897	37.0661			2.9595	74.7443		2	3	2	5	2	3	2	5	39	20.605	228740000	169500000	59245000	284330000	211530000	72804000	124320000	92194000	32130000	483250000	71093000	412160000
sp|P0A7Y0|RNC_ECOLI Ribonuclease 3 OS=Escherichia coli (strain K12) OX=83333 GN=rnc PE=1 SV=1;sp|C4ZYJ0|RNC_ECOBW Ribonuclease 3 OS=Escherichia coli (strain K12 / MC4100 / BW2952) OX=595496 GN=rnc PE=3 SV=1;sp|B1XB41|RNC_ECODH Ribonuclease 3 OS=Escherichia	P0A7Y0	Ribonuclease 3	rnc							2.8047	73.7167		5	4	4	6	5	4	4	6	39.4	25.55	236160000	161910000	74249000	134970000	105880000	29091000	0	0	0	355080000	34798000	320280000
sp|P0A7Y8|RNPA_ECOLI Ribonuclease P protein component OS=Escherichia coli (strain K12) OX=83333 GN=rnpA PE=1 SV=1;sp|C4ZYY1|RNPA_ECOBW Ribonuclease P protein component OS=Escherichia coli (strain K12 / MC4100 / BW2952) OX=595496 GN=rnpA PE=3 SV=1;sp|B1X9T2	P0A7Y8	Ribonuclease P protein component	rnpA										2	2	2	2	2	2	2	2	29.4	13.789	0	0	0	0	0	0	0	0	0	0	0	0
sp|P0A7Z0|RPIA_ECOLI Ribose-5-phosphate isomerase A OS=Escherichia coli (strain K12) OX=83333 GN=rpiA PE=1 SV=1;sp|C5A0I5|RPIA_ECOBW Ribose-5-phosphate isomerase A OS=Escherichia coli (strain K12 / MC4100 / BW2952) OX=595496 GN=rpiA PE=3 SV=1;sp|B1XEJ9|RPI	P0A7Z0	Ribose-5-phosphate isomerase A	rpiA	0.49299	33.0203	0.5237	34.3703	0.49397	33.0643	2.8246	73.8535		6	5	7	8	6	5	7	8	49.8	22.86	1641100000	1109600000	531520000	1340700000	860160000	480540000	2384600000	1632400000	752140000	7889500000	1911600000	5977900000
sp|P0A7Z4|RPOA_ECOLI DNA-directed RNA polymerase subunit alpha OS=Escherichia coli (strain K12) OX=83333 GN=rpoA PE=1 SV=1	P0A7Z4	DNA-directed RNA polymerase subunit alpha	rpoA	0.44314	30.7067	0.47523	32.214	0.46576	31.776	2.5635	71.9377		26	28	30	34	26	28	30	34	90.3	36.511	11324000000	7490800000	3832800000	11094000000	7451700000	3642200000	14175000000	9367500000	4807700000	13356000000	3616500000	9739700000
sp|P0A800|RPOZ_ECOLI DNA-directed RNA polymerase subunit omega OS=Escherichia coli (strain K12) OX=83333 GN=rpoZ PE=1 SV=1;sp|C4ZXP1|RPOZ_ECOBW DNA-directed RNA polymerase subunit omega OS=Escherichia coli (strain K12 / MC4100 / BW2952) OX=595496 GN=rpoZ P	P0A800	DNA-directed RNA polymerase subunit omega	rpoZ	0.76222	43.2534	0.85295	46.032	0.8277	45.2864	3.7693	79.0326		4	3	4	5	4	3	4	5	73.6	10.236	1359400000	921870000	437540000	2030500000	1119000000	911410000	2323000000	1276200000	1046700000	2553700000	541240000	2012500000
sp|P0A805|RRF_ECOLI Ribosome-recycling factor OS=Escherichia coli (strain K12) OX=83333 GN=frr PE=1 SV=1;sp|C4ZRR4|RRF_ECOBW Ribosome-recycling factor OS=Escherichia coli (strain K12 / MC4100 / BW2952) OX=595496 GN=frr PE=3 SV=1;sp|B1XD41|RRF_ECODH Ribosom	P0A805	Ribosome-recycling factor	frr			0.49388	33.0602			2.5297	71.669		6	4	5	10	6	4	5	10	63.8	20.638	440250000	428700000	11557000	450980000	406430000	44544000	596290000	536430000	59862000	2493900000	316900000	2177000000
sp|P0A812|RUVB_ECOLI Holliday junction ATP-dependent DNA helicase RuvB OS=Escherichia coli (strain K12) OX=83333 GN=ruvB PE=1 SV=1;sp|C4ZQE4|RUVB_ECOBW Holliday junction ATP-dependent DNA helicase RuvB OS=Escherichia coli (strain K12 / MC4100 / BW2952) OX=	P0A812	Holliday junction ATP-dependent DNA helicase RuvB	ruvB			0.71208	41.5915	0.66649	39.9936				5	5	6	2	5	5	6	2	24.1	37.173	60697000	49902000	10796000	73107000	40758000	32348000	169570000	96130000	73441000	0	0	0
sp|P0A817|METK_ECOLI S-adenosylmethionine synthase OS=Escherichia coli (strain K12) OX=83333 GN=metK PE=1 SV=2;sp|C5A0L1|METK_ECOBW S-adenosylmethionine synthase OS=Escherichia coli (strain K12 / MC4100 / BW2952) OX=595496 GN=metK PE=3 SV=1;sp|B1XFA4|METK_	P0A817	S-adenosylmethionine synthase	metK	0.64368	39.1609	0.7167	41.7487	0.72682	42.0901	2.87	74.1602		13	15	16	18	13	15	16	18	57.3	41.951	13259000000	8345900000	4912700000	17509000000	10416000000	7093400000	19926000000	11784000000	8141500000	22351000000	4311300000	18040000000
sp|P0A821|SELA_ECOLI L-seryl-tRNA(Sec) selenium transferase OS=Escherichia coli (strain K12) OX=83333 GN=selA PE=1 SV=1;sp|C4ZXI2|SELA_ECOBW L-seryl-tRNA(Sec) selenium transferase OS=Escherichia coli (strain K12 / MC4100 / BW2952) OX=595496 GN=selA PE=3 SV	P0A821	L-seryl-tRNA(Sec) selenium transferase	selA			0.492	32.9759	0.49324	33.0315				3	4	4	2	3	4	4	2	16.6	50.607	138280000	138280000	0	148990000	111930000	37058000	182100000	145220000	36887000	67630000	20762000	46867000
sp|P0A823|SFSA_ECOLI Sugar fermentation stimulation protein A OS=Escherichia coli (strain K12) OX=83333 GN=sfsA PE=1 SV=1;sp|C4ZRN9|SFSA_ECOBW Sugar fermentation stimulation protein A OS=Escherichia coli (strain K12 / MC4100 / BW2952) OX=595496 GN=sfsA PE=	P0A823	Sugar fermentation stimulation protein A	sfsA													2	0	1	0	2	16.7	26.228	0	0	0	853790000	853790000	0	0	0	0	0	0	0
sp|P0A825|GLYA_ECOLI Serine hydroxymethyltransferase OS=Escherichia coli (strain K12) OX=83333 GN=glyA PE=1 SV=1;sp|C4ZXC6|GLYA_ECOBW Serine hydroxymethyltransferase OS=Escherichia coli (strain K12 / MC4100 / BW2952) OX=595496 GN=glyA PE=3 SV=1;sp|B1XB26|G	P0A825	Serine hydroxymethyltransferase	glyA	0.31957	24.2177	0.35887	26.4094	0.38367	27.7284	2.758	73.3901		18	19	20	22	18	19	20	22	56.1	45.316	17789000000	12984000000	4805200000	17948000000	12896000000	5052200000	16698000000	11963000000	4735500000	43475000000	10867000000	32608000000
sp|P0A830|DCTA_ECOLI Aerobic C4-dicarboxylate transport protein OS=Escherichia coli (strain K12) OX=83333 GN=dctA PE=1 SV=1;sp|C4ZW75|DCTA_ECOBW C4-dicarboxylate transport protein OS=Escherichia coli (strain K12 / MC4100 / BW2952) OX=595496 GN=dctA PE=3 SV	P0A830	Aerobic C4-dicarboxylate transport protein;C4-dicarboxylate transport protein	dctA												2		0	1	2	0	5.1	45.436	0	0	0	54416000	54416000	0	53928000	53928000	0	0	0	0
sp|P0A832|SSRP_ECOLI SsrA-binding protein OS=Escherichia coli (strain K12) OX=83333 GN=smpB PE=1 SV=2;sp|C4ZYN7|SSRP_ECOBW SsrA-binding protein OS=Escherichia coli (strain K12 / MC4100 / BW2952) OX=595496 GN=smpB PE=3 SV=1;sp|B1XBU0|SSRP_ECODH SsrA-binding	P0A832	SsrA-binding protein	smpB										3			2	3	1	1	2	21.9	18.269	682400000	524190000	158210000	648570000	453370000	195200000	695670000	510890000	184780000	133950000	133950000	0
sp|P0A836|SUCC_ECOLI Succinate--CoA ligase [ADP-forming] subunit beta OS=Escherichia coli (strain K12) OX=83333 GN=sucC PE=1 SV=1;sp|C4ZWK2|SUCC_ECOBW Succinate--CoA ligase [ADP-forming] subunit beta OS=Escherichia coli (strain K12 / MC4100 / BW2952) OX=59	P0A836	Succinyl-CoA ligase [ADP-forming] subunit beta	sucC	0.35493	26.1954	0.36635	26.8123	0.35674	26.2939	1.6564	62.3551		21	20	21	23	21	20	21	23	64.4	41.392	8549500000	6236400000	2313200000	10383000000	7483900000	2899400000	9485200000	7038100000	2447000000	11972000000	4260200000	7712200000
sp|P0A840|SURE_ECOLI 5/3-nucleotidase SurE OS=Escherichia coli (strain K12) OX=83333 GN=surE PE=1 SV=1;sp|C4ZZP8|SURE_ECOBW 5/3-nucleotidase SurE OS=Escherichia coli (strain K12 / MC4100 / BW2952) OX=595496 GN=surE PE=3 SV=1;sp|B1XCS0|SURE_ECODH 5/3-	P0A840	5/3-nucleotidase SurE	surE							2.5475	71.8111					4	1	1	1	4	26.1	26.9	99489000	69503000	29986000	63820000	42853000	20968000	59019000	37660000	21359000	307310000	125370000	181940000
sp|P0A847|TGT_ECOLI Queuine tRNA-ribosyltransferase OS=Escherichia coli (strain K12) OX=83333 GN=tgt PE=1 SV=1;sp|C4ZTG3|TGT_ECOBW Queuine tRNA-ribosyltransferase OS=Escherichia coli (strain K12 / MC4100 / BW2952) OX=595496 GN=tgt PE=3 SV=1;sp|B1XEZ4|TGT_E	P0A847	Queuine tRNA-ribosyltransferase	tgt	0.31292	23.8339	0.41554	29.3556	0.446	30.8437	1.3448	57.3524		10	10	12	8	10	10	12	8	48.8	42.593	1159500000	924230000	235250000	1419300000	1120500000	298790000	1571400000	1129200000	442170000	840300000	358110000	482190000
sp|P0A850|TIG_ECOLI Trigger factor OS=Escherichia coli (strain K12) OX=83333 GN=tig PE=1 SV=1;sp|C4ZTJ3|TIG_ECOBW Trigger factor OS=Escherichia coli (strain K12 / MC4100 / BW2952) OX=595496 GN=tig PE=1 SV=1;sp|B1XFM4|TIG_ECODH Trigger factor OS=Escherichia	P0A850	Trigger factor	tig	0.41825	29.4906	0.47614	32.2557	0.45729	31.3795	2.3065	69.7565		28	31	29	33	28	31	29	33	71.3	48.192	25114000000	17256000000	7857600000	26050000000	17888000000	8162500000	26767000000	18243000000	8523700000	34537000000	10112000000	24425000000
sp|P0A855|TOLB_ECOLI Tol-Pal system protein TolB OS=Escherichia coli (strain K12) OX=83333 GN=tolB PE=1 SV=1;sp|C4ZWL5|TOLB_ECOBW Tol-Pal system protein TolB OS=Escherichia coli (strain K12 / MC4100 / BW2952) OX=595496 GN=tolB PE=3 SV=1;sp|B1X6S1|TOLB_ECOD	P0A855	Protein TolB	tolB	0.47357	32.1376	0.51773	34.1121	0.53624	34.906	2.5443	71.7857		19	20	20	19	19	20	20	19	64	45.955	4786400000	2949400000	1837000000	5090100000	3213200000	1876900000	6291300000	3585100000	2706200000	5117500000	1177800000	3939700000
sp|P0A858|TPIS_ECOLI Triosephosphate isomerase OS=Escherichia coli (strain K12) OX=83333 GN=tpiA PE=1 SV=1;sp|B1XB85|TPIS_ECODH Triosephosphate isomerase OS=Escherichia coli (strain K12 / DH10B) OX=316385 GN=tpiA PE=1 SV=1	P0A858	Triosephosphate isomerase	tpiA	0.48071	32.4648	0.48445	32.635	0.4838	32.6055	2.6733	72.7765		13	12	13	15	13	12	13	15	91	26.972	6295500000	4230200000	2065200000	6965600000	4577000000	2388600000	8074800000	5466800000	2608000000	12701000000	3498300000	9202200000
sp|P0A862|TPX_ECOLI Thiol peroxidase OS=Escherichia coli (strain K12) OX=83333 GN=tpx PE=1 SV=2	P0A862	Thiol peroxidase	tpx	0.43328	30.23	0.43926	30.5199	0.44388	30.7422	2.7775	73.5275		7	7	8	8	7	7	8	8	79.2	17.835	12454000000	8732000000	3721600000	14108000000	9525100000	4583400000	12789000000	8688000000	4100700000	37779000000	9625100000	28153000000
sp|P0A867|TALA_ECOLI Transaldolase A OS=Escherichia coli (strain K12) OX=83333 GN=talA PE=3 SV=1	P0A867	Transaldolase A	talA	0.62149	38.3283	0.63358	38.7848	0.58569	36.936	3.5019	77.7872		19	20	20	32	18	19	19	31	85.4	35.658	3199600000	2094100000	1105500000	4491600000	3017100000	1474500000	4161700000	2644200000	1517500000	16383000000	3015800000	13367000000
sp|P0A870|TALB_ECOLI Transaldolase B OS=Escherichia coli (strain K12) OX=83333 GN=talB PE=1 SV=2	P0A870	Transaldolase B	talB	0.4245	29.7999	0.45343	31.1972	0.45022	31.0449	2.5661	71.9582		18	17	22	25	17	16	21	24	90.2	35.219	10762000000	7502800000	3259500000	13119000000	8572700000	4546500000	12996000000	8845600000	4150800000	29337000000	8207500000	21130000000
sp|P0A877|TRPA_ECOLI Tryptophan synthase alpha chain OS=Escherichia coli (strain K12) OX=83333 GN=trpA PE=1 SV=1;sp|C4ZTV3|TRPA_ECOBW Tryptophan synthase alpha chain OS=Escherichia coli (strain K12 / MC4100 / BW2952) OX=595496 GN=trpA PE=3 SV=1;sp|B1XBK9|T	P0A877	Tryptophan synthase alpha chain	trpA	0.25141	20.0901	0.29016	22.4902	0.27263	21.4226	2.8903	74.295		12	12	11	15	12	12	11	15	86.6	28.724	5499800000	4471200000	1028600000	5577300000	4459400000	1117900000	5080000000	4083200000	996760000	13441000000	3779600000	9661500000
sp|P0A879|TRPB_ECOLI Tryptophan synthase beta chain OS=Escherichia coli (strain K12) OX=83333 GN=trpB PE=1 SV=2;sp|B1XBL0|TRPB_ECODH Tryptophan synthase beta chain OS=Escherichia coli (strain K12 / DH10B) OX=316385 GN=trpB PE=3 SV=1	P0A879	Tryptophan synthase beta chain	trpB	0.28658	22.2746	0.29979	23.0645	0.28752	22.3313	2.8663	74.1355		19	18	20	17	19	18	20	17	76.8	42.983	22906000000	17546000000	5359900000	17498000000	13500000000	3997800000	20534000000	16081000000	4453300000	11651000000	2656600000	8994500000
sp|P0A881|TRPR_ECOLI Trp operon repressor OS=Escherichia coli (strain K12) OX=83333 GN=trpR PE=1 SV=2;sp|C4ZT75|TRPR_ECOBW Trp operon repressor OS=Escherichia coli (strain K12 / MC4100 / BW2952) OX=595496 GN=trpR PE=3 SV=1;sp|B1XFK3|TRPR_ECODH Trp operon r	P0A881	Trp operon repressor	trpR											2	2	2	1	2	2	2	24.1	12.355	0	0	0	0	0	0	0	0	0	0	0	0
sp|P0A884|TYSY_ECOLI Thymidylate synthase OS=Escherichia coli (strain K12) OX=83333 GN=thyA PE=1 SV=1;sp|C4ZZX9|TYSY_ECOBW Thymidylate synthase OS=Escherichia coli (strain K12 / MC4100 / BW2952) OX=595496 GN=thyA PE=3 SV=1	P0A884	Thymidylate synthase	thyA							2.6568	72.6537		4	4	4	5	4	4	4	5	26.1	30.479	377350000	280960000	96390000	223590000	223590000	0	181370000	181370000	0	406060000	107590000	298470000
sp|P0A887|UBIE_ECOLI Ubiquinone/menaquinone biosynthesis C-methyltransferase UbiE OS=Escherichia coli (strain K12) OX=83333 GN=ubiE PE=1 SV=1;sp|C5A009|UBIE_ECOBW Ubiquinone/menaquinone biosynthesis C-methyltransferase UbiE OS=Escherichia coli (strain K12	P0A887	Ubiquinone/menaquinone biosynthesis C-methyltransferase UbiE	ubiE	0.56728	36.1952	0.58513	36.9137	0.65502	39.5778	2.229	69.0307		14	14	14	10	14	14	14	10	65.3	28.073	3968000000	2578700000	1389300000	2437800000	1290300000	1147500000	3096800000	1732700000	1364200000	808530000	232140000	576390000
sp|P0A894|RAPZ_ECOLI RNase adapter protein RapZ OS=Escherichia coli (strain K12) OX=83333 GN=rapZ PE=1 SV=1;sp|C4ZSU4|RAPZ_ECOBW RNase adapter protein RapZ OS=Escherichia coli (strain K12 / MC4100 / BW2952) OX=595496 GN=rapZ PE=3 SV=1;sp|B1XHI0|RAPZ_ECODH	P0A894	RNase adapter protein RapZ	rapZ	0.44194	30.649								3		3	4	3	1	3	4	19.7	32.492	158340000	129710000	28630000	108470000	65602000	42869000	124440000	104940000	19503000	54354000	16523000	37832000
sp|P0A8A0|YEBC_ECOLI Probable transcriptional regulatory protein YebC OS=Escherichia coli (strain K12) OX=83333 GN=yebC PE=1 SV=1	P0A8A0	Probable transcriptional regulatory protein YebC	yebC	0.39567	28.3498	0.4197	29.5626	0.41213	29.185	2.8017	73.696		5	5	5	7	5	5	5	7	27.6	26.422	743670000	518450000	225230000	878640000	596120000	282520000	1018300000	724750000	293580000	5565100000	1554500000	4010700000
sp|P0A8A2|YEEN_ECOLI Probable transcriptional regulatory protein YeeN OS=Escherichia coli (strain K12) OX=83333 GN=yeeN PE=1 SV=1	P0A8A2	Probable transcriptional regulatory protein YeeN	yeeN													4	1	1	1	4	23.5	25.867	0	0	0	0	0	0	0	0	0	686780000	54474000	632310000
sp|P0A8A4|PSRP_ECOLI Phosphoenolpyruvate synthase regulatory protein OS=Escherichia coli (strain K12) OX=83333 GN=ppsR PE=1 SV=1;sp|C4ZYG5|PSRP_ECOBW Phosphoenolpyruvate synthase regulatory protein OS=Escherichia coli (strain K12 / MC4100 / BW2952) OX=5954	P0A8A4	Phosphoenolpyruvate synthase regulatory protein	ppsR	0.45353	31.202	0.48509	32.664			2.1984	68.7344		8	8	7	6	8	8	7	6	48.7	31.211	330590000	219930000	110650000	255710000	166680000	89033000	191080000	126900000	64180000	392160000	63725000	328430000
sp|P0A8A8|RIMP_ECOLI Ribosome maturation factor RimP OS=Escherichia coli (strain K12) OX=83333 GN=rimP PE=1 SV=2;sp|B1XGY2|RIMP_ECODH Ribosome maturation factor RimP OS=Escherichia coli (strain K12 / DH10B) OX=316385 GN=rimP PE=3 SV=1;sp|C4ZSR1|RIMP_ECOBW	P0A8A8	Ribosome maturation factor RimP	rimP										2	2		3	2	2	1	3	28.7	16.651	0	0	0	0	0	0	0	0	0	36319000	15987000	20332000
sp|P0A8B2|YFCN_ECOLI UPF0115 protein YfcN OS=Escherichia coli (strain K12) OX=83333 GN=yfcN PE=3 SV=1;sp|C4ZVM4|YFCN_ECOBW UPF0115 protein YfcN OS=Escherichia coli (strain K12 / MC4100 / BW2952) OX=595496 GN=yfcN PE=3 SV=1;sp|B1X9K4|YFCN_ECODH UPF0115 prot	P0A8B2	UPF0115 protein YfcN	yfcN					0.50316	33.4735	2.6798	72.8246		2		2	2	2	1	2	2	29.5	21.013	110450000	81663000	28782000	57629000	32325000	25304000	81756000	51518000	30239000	780510000	276580000	503930000
sp|P0A8B5|YBAB_ECOLI Nucleoid-associated protein YbaB OS=Escherichia coli (strain K12) OX=83333 GN=ybaB PE=1 SV=1;sp|C4ZUS5|YBAB_ECOBW Nucleoid-associated protein YbaB OS=Escherichia coli (strain K12 / MC4100 / BW2952) OX=595496 GN=ybaB PE=3 SV=1;sp|B1XFQ8	P0A8B5	Nucleoid-associated protein YbaB	ybaB	0.47443	32.1772	0.47016	31.9802	0.45749	31.3889	2.7382	73.2492		5	5	5	5	5	5	5	5	72.5	12.015	535420000	340970000	194450000	748510000	474530000	273980000	746760000	561050000	185710000	2604400000	738680000	1865700000
sp|P0A8C1|YBJQ_ECOLI UPF0145 protein YbjQ OS=Escherichia coli (strain K12) OX=83333 GN=ybjQ PE=1 SV=1;sp|C4ZY38|YBJQ_ECOBW UPF0145 protein YbjQ OS=Escherichia coli (strain K12 / MC4100 / BW2952) OX=595496 GN=ybjQ PE=3 SV=1;sp|B1X807|YBJQ_ECODH UPF0145 prot	P0A8C1	UPF0145 protein YbjQ	ybjQ										2	2	2		2	2	2	1	25.2	11.437	0	0	0	0	0	0	0	0	0	0	0	0
sp|P0A8D0|NRDR_ECOLI Transcriptional repressor NrdR OS=Escherichia coli (strain K12) OX=83333 GN=nrdR PE=1 SV=1;sp|C4ZTH0|NRDR_ECOBW Transcriptional repressor NrdR OS=Escherichia coli (strain K12 / MC4100 / BW2952) OX=595496 GN=nrdR PE=3 SV=1;sp|B1XF01|NRD	P0A8D0	Transcriptional repressor NrdR	nrdR	0.46057	31.5336	0.49385	33.0589	0.53101	34.6836	1.8867	65.3584		4	6	6	3	4	6	6	3	59.7	17.229	933280000	682180000	251100000	790310000	527700000	262610000	921630000	586320000	335310000	303200000	83502000	219690000
sp|P0A8D6|YMDB_ECOLI O-acetyl-ADP-ribose deacetylase OS=Escherichia coli (strain K12) OX=83333 GN=ymdB PE=1 SV=1	P0A8D6	O-acetyl-ADP-ribose deacetylase	ymdB										5	5	4	6	5	5	4	6	63.3	18.88	172410000	107740000	64668000	188480000	99896000	88583000	47142000	47142000	0	130190000	0	130190000
sp|P0A8E1|YCFP_ECOLI UPF0227 protein YcfP OS=Escherichia coli (strain K12) OX=83333 GN=ycfP PE=1 SV=1;sp|C4ZS48|YCFP_ECOBW UPF0227 protein YcfP OS=Escherichia coli (strain K12 / MC4100 / BW2952) OX=595496 GN=ycfP PE=3 SV=1;sp|B1XA18|YCFP_ECODH UPF0227 prot	P0A8E1	UPF0227 protein YcfP	ycfP	0.66586	39.9709			0.72399	41.995	2.6773	72.8061		7	4	6	7	7	4	6	7	52.2	21.226	910520000	637350000	273170000	372290000	287720000	84565000	867220000	593680000	273540000	1151500000	191270000	960280000
sp|P0A8E5|YACL_ECOLI UPF0231 protein YacL OS=Escherichia coli (strain K12) OX=83333 GN=yacL PE=1 SV=1;sp|C4ZRL2|YACL_ECOBW UPF0231 protein YacL OS=Escherichia coli (strain K12 / MC4100 / BW2952) OX=595496 GN=yacL PE=3 SV=1;sp|B1XC94|YACL_ECODH UPF0231 prot	P0A8E5	UPF0231 protein YacL	yacL							3.6916	78.6853					2	1	1	1	2	25.8	13.941	48590000	27772000	20819000	68276000	35190000	33086000	64665000	37629000	27036000	232140000	46211000	185930000
sp|P0A8E7|YAJQ_ECOLI UPF0234 protein YajQ OS=Escherichia coli (strain K12) OX=83333 GN=yajQ PE=1 SV=2;sp|C4ZTI3|YAJQ_ECOBW UPF0234 protein YajQ OS=Escherichia coli (strain K12 / MC4100 / BW2952) OX=595496 GN=yajQ PE=3 SV=1;sp|B1XFL4|YAJQ_ECODH UPF0234 prot	P0A8E7	UPF0234 protein YajQ	yajQ	0.51136	33.8344	0.50213	33.4279	0.52618	34.4769	2.9398	74.618		10	10	13	16	10	10	13	16	79.8	18.344	2010900000	1244300000	766580000	2081800000	1342100000	739740000	1830500000	1274000000	556460000	7104900000	1763100000	5341800000
sp|P0A8F0|UPP_ECOLI Uracil phosphoribosyltransferase OS=Escherichia coli (strain K12) OX=83333 GN=upp PE=1 SV=1;sp|C4ZX73|UPP_ECOBW Uracil phosphoribosyltransferase OS=Escherichia coli (strain K12 / MC4100 / BW2952) OX=595496 GN=upp PE=3 SV=1;sp|B1XAX3|UPP	P0A8F0	Uracil phosphoribosyltransferase	upp	0.50358	33.4921	0.63507	38.8405	0.6754	40.3128	2.0283	66.9782		12	12	12	12	12	12	12	12	86.1	22.533	22620000000	14417000000	8203100000	18871000000	10829000000	8041700000	23165000000	13179000000	9985200000	15285000000	4706600000	10578000000
sp|P0A8F4|URK_ECOLI Uridine kinase OS=Escherichia coli (strain K12) OX=83333 GN=udk PE=3 SV=1	P0A8F4	Uridine kinase	udk	0.42432	29.7911	0.53877	35.013	0.54465	35.2604	2.4424	70.9505		4	5	4	3	4	5	4	3	39.9	24.353	249480000	179740000	69745000	440740000	315970000	124760000	372530000	241530000	131000000	180080000	56288000	123790000
sp|P0A8F8|UVRB_ECOLI UvrABC system protein B OS=Escherichia coli (strain K12) OX=83333 GN=uvrB PE=1 SV=2;sp|C4ZXV1|UVRB_ECOBW UvrABC system protein B OS=Escherichia coli (strain K12 / MC4100 / BW2952) OX=595496 GN=uvrB PE=3 SV=1;sp|B1X7A9|UVRB_ECODH UvrABC	P0A8F8	UvrABC system protein B	uvrB	0.59652	37.3638	0.5871	36.992			3.6971	78.7103		5	6	5	8	5	6	5	8	15.2	76.225	340060000	223720000	116330000	340220000	182940000	157280000	206190000	89738000	116460000	347130000	35419000	311710000
sp|P0A8G0|UVRC_ECOLI UvrABC system protein C OS=Escherichia coli (strain K12) OX=83333 GN=uvrC PE=1 SV=1;sp|C4ZQJ1|UVRC_ECOBW UvrABC system protein C OS=Escherichia coli (strain K12 / MC4100 / BW2952) OX=595496 GN=uvrC PE=3 SV=1;sp|B1X671|UVRC_ECODH UvrABC	P0A8G0	UvrABC system protein C	uvrC	0.39185	28.1532	0.44392	30.7441	0.45908	31.4637	2.9411	74.6264		11	10	10	13	11	10	10	13	33.9	68.187	728440000	422570000	305870000	668840000	492260000	176570000	447150000	349110000	98038000	499610000	106970000	392650000
sp|P0A8G3|UXAC_ECOLI Uronate isomerase OS=Escherichia coli (strain K12) OX=83333 GN=uxaC PE=2 SV=1;sp|C4ZR08|UXAC_ECOBW Uronate isomerase OS=Escherichia coli (strain K12 / MC4100 / BW2952) OX=595496 GN=uxaC PE=3 SV=1;sp|B1XG96|UXAC_ECODH Uronate isomerase	P0A8G3	Uronate isomerase	uxaC					0.1488	12.9526	4.0072	80.0288		2	2	2	13	2	2	2	13	42.8	53.987	36930000	36930000	0	0	0	0	955340000	873670000	81661000	1470200000	232440000	1237700000
sp|P0A8G6|NQOR_ECOLI NAD(P)H dehydrogenase (quinone) OS=Escherichia coli (strain K12) OX=83333 GN=wrbA PE=1 SV=2;sp|C4ZQD2|NQOR_ECOBW NAD(P)H dehydrogenase (quinone) OS=Escherichia coli (strain K12 / MC4100 / BW2952) OX=595496 GN=BWG_0858 PE=3 SV=1;sp|B1X9	P0A8G6	NAD(P)H dehydrogenase (quinone)	wrbA;BWG_0858;ECDH10B_1076	0.70687	41.4132	0.67024	40.1284	0.63332	38.775	3.2401	76.4157		9	9	10	11	9	9	10	11	61.6	20.845	5500200000	3884700000	1615400000	6348700000	3833000000	2515800000	7191200000	4370100000	2821100000	13812000000	2983300000	10828000000
sp|P0A8H6|YIHI_ECOLI Der GTPase-activating protein YihI OS=Escherichia coli (strain K12) OX=83333 GN=yihI PE=1 SV=1;sp|C5A034|YIHI_ECOBW Der GTPase-activating protein YihI OS=Escherichia coli (strain K12 / MC4100 / BW2952) OX=595496 GN=yihI PE=3 SV=1;sp|B1	P0A8H6	Der GTPase-activating protein YihI	yihI							3.1023	75.6234		2			5	2	1	1	5	32	19.059	234380000	153000000	81380000	79744000	48928000	30816000	197400000	122710000	74692000	694360000	192070000	502290000
sp|P0A8I3|YAAA_ECOLI UPF0246 protein YaaA OS=Escherichia coli (strain K12) OX=83333 GN=yaaA PE=1 SV=1;sp|C4ZPT3|YAAA_ECOBW UPF0246 protein YaaA OS=Escherichia coli (strain K12 / MC4100 / BW2952) OX=595496 GN=yaaA PE=3 SV=1;sp|B1XBD1|YAAA_ECODH UPF0246 prot	P0A8I3	UPF0246 protein YaaA	yaaA	0.37997	27.5347	0.41895	29.5254	0.41879	29.5174	2.6734	72.7773		11	14	14	12	11	14	14	12	66.7	29.585	1456000000	1141000000	315020000	898220000	529750000	368460000	1391400000	978770000	412630000	382740000	93788000	288950000
sp|P0A8I5|TRMB_ECOLI tRNA (guanine-N(7)-)-methyltransferase OS=Escherichia coli (strain K12) OX=83333 GN=trmB PE=1 SV=1	P0A8I5	tRNA (guanine-N(7)-)-methyltransferase	trmB	0.46546	31.762	0.49565	33.1394	0.54012	35.07	2.9798	74.8731		8	6	5	5	8	6	5	5	52.3	27.307	935330000	559960000	375370000	881850000	391110000	490740000	976890000	659800000	317090000	868530000	87614000	780920000
sp|P0A8I8|RLMH_ECOLI Ribosomal RNA large subunit methyltransferase H OS=Escherichia coli (strain K12) OX=83333 GN=rlmH PE=1 SV=1;sp|C4ZWC3|RLMH_ECOBW Ribosomal RNA large subunit methyltransferase H OS=Escherichia coli (strain K12 / MC4100 / BW2952) OX=5954	P0A8I8	Ribosomal RNA large subunit methyltransferase H	rlmH;rlmH1	0.53946	35.0422	0.54409	35.2369	0.48989	32.881				6	5	3	2	6	5	3	2	58.7	17.341	224600000	164820000	59777000	173370000	125660000	47709000	172730000	109790000	62943000	75482000	23480000	52001000
sp|P0A8J2|DNAT_ECOLI Primosomal protein 1 OS=Escherichia coli (strain K12) OX=83333 GN=dnaT PE=1 SV=2;sp|C4ZT45|DNAT_ECOBW Primosomal protein 1 OS=Escherichia coli (strain K12 / MC4100 / BW2952) OX=595496 GN=dnaT PE=3 SV=1;sp|B1XFH3|DNAT_ECODH Primosomal p	P0A8J2	Primosomal protein 1	dnaT							3.8954	79.5727					2	0	0	1	2	28.5	19.455	0	0	0	0	0	0	41693000	14613000	27079000	150210000	31928000	118280000
sp|P0A8J4|YBED_ECOLI UPF0250 protein YbeD OS=Escherichia coli (strain K12) OX=83333 GN=ybeD PE=1 SV=1;sp|C4ZWB8|YBED_ECOBW UPF0250 protein YbeD OS=Escherichia coli (strain K12 / MC4100 / BW2952) OX=595496 GN=ybeD PE=3 SV=1	P0A8J4	UPF0250 protein YbeD	ybeD										3	3	3	3	3	3	3	3	55.2	9.8272	564980000	469140000	95833000	644770000	520010000	124760000	663700000	537440000	126260000	1857700000	219660000	1638100000
sp|P0A8J8|RHLB_ECOLI ATP-dependent RNA helicase RhlB OS=Escherichia coli (strain K12) OX=83333 GN=rhlB PE=1 SV=2;sp|C4ZZ48|RHLB_ECOBW ATP-dependent RNA helicase RhlB OS=Escherichia coli (strain K12 / MC4100 / BW2952) OX=595496 GN=rhlB PE=3 SV=1;sp|B1X9Z4|R	P0A8J8	ATP-dependent RNA helicase RhlB	rhlB	0.37401	27.2203	0.37998	27.5352	0.37525	27.2859	2.2519	69.2487		16	13	16	10	16	13	16	10	53.7	47.125	6122000000	4658600000	1463500000	4252900000	3073600000	1179200000	4230700000	3027300000	1203400000	2508200000	868030000	1640100000
sp|P0A8K5|YAEP_ECOLI UPF0253 protein YaeP OS=Escherichia coli (strain K12) OX=83333 GN=yaeP PE=3 SV=1;sp|C4ZRT2|YAEP_ECOBW UPF0253 protein YaeP OS=Escherichia coli (strain K12 / MC4100 / BW2952) OX=595496 GN=yaeP PE=3 SV=1;sp|B1XD59|YAEP_ECODH UPF0253 prot	P0A8K5	UPF0253 protein YaeP	yaeP	1.2143	54.839	0.69103	40.8644	0.5715	36.3665	2.9776	74.8592		3	2	2	4	3	2	2	4	95.5	7.2141	255940000	123110000	132830000	287260000	186630000	100630000	302720000	198830000	103890000	1390700000	306300000	1084400000
sp|P0A8L1|SYS_ECOLI Serine--tRNA ligase OS=Escherichia coli (strain K12) OX=83333 GN=serS PE=1 SV=1;sp|C4ZQ19|SYS_ECOBW Serine--tRNA ligase OS=Escherichia coli (strain K12 / MC4100 / BW2952) OX=595496 GN=serS PE=3 SV=1;sp|B1X833|SYS_ECODH Serine--tRNA liga	P0A8L1	Serine--tRNA ligase	serS	0.39343	28.2346	0.4327	30.2017	0.43462	30.2951	2.698	72.9584		13	12	14	18	13	12	14	18	58.8	48.413	3414100000	2484800000	929320000	3600700000	2513500000	1087200000	4370000000	2969800000	1400300000	7007300000	2331600000	4675700000
sp|P0A8M0|SYN_ECOLI Asparagine--tRNA ligase OS=Escherichia coli (strain K12) OX=83333 GN=asnS PE=1 SV=2	P0A8M0	Asparagine--tRNA ligase	asnS	0.37763	27.4116	0.44391	30.7436	0.45208	31.1333	2.4931	71.3721		24	24	23	26	24	24	23	26	55.6	52.57	8321600000	5792800000	2528900000	6802500000	4391500000	2411000000	7488900000	5052300000	2436600000	9667000000	2561500000	7105500000
sp|P0A8M3|SYT_ECOLI Threonine--tRNA ligase OS=Escherichia coli (strain K12) OX=83333 GN=thrS PE=1 SV=1;sp|C4ZYI1|SYT_ECOBW Threonine--tRNA ligase OS=Escherichia coli (strain K12 / MC4100 / BW2952) OX=595496 GN=thrS PE=3 SV=1;sp|B1XGI1|SYT_ECODH Threonine--	P0A8M3	Threonine--tRNA ligase	thrS	0.27082	21.3106	0.31954	24.216	0.28452	22.1499	2.5056	71.4742		23	24	24	26	23	24	24	26	43.3	74.013	4689000000	3773700000	915250000	4376800000	3442800000	934090000	5062400000	3801400000	1261000000	4771300000	1130300000	3641000000
sp|P0A8M6|YEEX_ECOLI UPF0265 protein YeeX OS=Escherichia coli (strain K12) OX=83333 GN=yeeX PE=1 SV=1;sp|C4ZQR6|YEEX_ECOBW UPF0265 protein YeeX OS=Escherichia coli (strain K12 / MC4100 / BW2952) OX=595496 GN=yeeX PE=3 SV=1	P0A8M6	UPF0265 protein YeeX	yeeX	0.42592	29.8698	0.39131	28.1253	0.42901	30.0215	2.8724	74.1762		6	7	8	8	6	7	8	8	63.3	12.778	11593000000	9910300000	1682300000	13080000000	10991000000	2089200000	12956000000	10694000000	2261400000	7864600000	2026700000	5837900000
sp|P0A8N3|SYK1_ECOLI Lysine--tRNA ligase OS=Escherichia coli (strain K12) OX=83333 GN=lysS PE=1 SV=2	P0A8N3	Lysine--tRNA ligase	lysS	0.41365	29.2611	0.47921	32.3963	0.45515	31.2786	2.4441	70.9648		35	25	28	23	26	19	21	17	73.5	57.603	14741000000	10007000000	4733900000	9821800000	6669000000	3152800000	11968000000	8187500000	3780000000	6142200000	1649600000	4492600000
sp|P0A8N5|SYK2_ECOLI Lysine--tRNA ligase, heat inducible OS=Escherichia coli (strain K12) OX=83333 GN=lysU PE=1 SV=2	P0A8N5	Lysine--tRNA ligase, heat inducible	lysU							3.4658	77.6076		13	9	9	13	4	3	2	7	37.4	57.826	57082000	38585000	18498000	118720000	75555000	43166000	0	0	0	253960000	41821000	212140000
sp|P0A8N7|EPMA_ECOLI Elongation factor P--(R)-beta-lysine ligase OS=Escherichia coli (strain K12) OX=83333 GN=epmA PE=1 SV=1;sp|C5A1E9|EPMA_ECOBW Elongation factor P--(R)-beta-lysine ligase OS=Escherichia coli (strain K12 / MC4100 / BW2952) OX=595496 GN=ep	P0A8N7	Elongation factor P--(R)-beta-lysine ligase	epmA										2	2	3		2	2	3	1	13.2	36.976	177860000	155630000	22229000	97811000	74596000	23215000	70229000	70229000	0	30076000	0	30076000
sp|P0A8P3|FETP_ECOLI Probable Fe(2+)-trafficking protein OS=Escherichia coli (strain K12) OX=83333 GN=yggX PE=1 SV=2;sp|C5A0N1|FETP_ECOBW Probable Fe(2+)-trafficking protein OS=Escherichia coli (strain K12 / MC4100 / BW2952) OX=595496 GN=yggX PE=3 SV=1;sp|	P0A8P3	Probable Fe(2+)-trafficking protein	yggX	0.52274	34.3289	0.493	33.0208	0.59303	37.2265	2.8571	74.0738		6	5	7	10	6	5	7	10	98.9	10.952	860310000	529320000	330990000	473040000	345360000	127670000	505600000	352720000	152880000	3430700000	714130000	2716500000
sp|P0A8R0|RRAA_ECOLI Regulator of ribonuclease activity A OS=Escherichia coli (strain K12) OX=83333 GN=rraA PE=1 SV=1;sp|C5A096|RRAA_ECOBW Regulator of ribonuclease activity A OS=Escherichia coli (strain K12 / MC4100 / BW2952) OX=595496 GN=rraA PE=3 SV=1;s	P0A8R0	Regulator of ribonuclease activity A	rraA										4	7	6	5	4	7	6	5	31.7	17.36	341310000	217390000	123920000	231770000	231770000	0	362470000	229450000	133020000	932300000	240620000	691680000
sp|P0A8R4|SLYX_ECOLI Protein SlyX OS=Escherichia coli (strain K12) OX=83333 GN=slyX PE=3 SV=1;sp|C4ZUK3|SLYX_ECOBW Protein SlyX OS=Escherichia coli (strain K12 / MC4100 / BW2952) OX=595496 GN=slyX PE=3 SV=1;sp|B1X6J7|SLYX_ECODH Protein SlyX OS=Escherichia	P0A8R4	Protein SlyX	slyX												2	2	1	1	2	2	38.9	8.2142	0	0	0	0	0	0	0	0	0	0	0	0
sp|P0A8R7|YCJF_ECOLI UPF0283 membrane protein YcjF OS=Escherichia coli (strain K12) OX=83333 GN=ycjF PE=1 SV=1;sp|C4ZV70|YCJF_ECOBW UPF0283 membrane protein YcjF OS=Escherichia coli (strain K12 / MC4100 / BW2952) OX=595496 GN=ycjF PE=3 SV=1;sp|B1XCF0|YCJF_	P0A8R7	UPF0283 membrane protein YcjF	ycjF											2	2	2	1	2	2	2	12.2	39.392	0	0	0	0	0	0	108800000	64000000	44799000	25248000	0	25248000
sp|P0A8R9|HDFR_ECOLI HTH-type transcriptional regulator HdfR OS=Escherichia coli (strain K12) OX=83333 GN=hdfR PE=3 SV=1;sp|C4ZZ35|HDFR_ECOBW HTH-type transcriptional regulator HdfR OS=Escherichia coli (strain K12 / MC4100 / BW2952) OX=595496 GN=hdfR PE=3	P0A8R9	HTH-type transcriptional regulator HdfR	hdfR													2	1	1	0	2	18.6	31.746	65018000	44225000	20793000	916790000	532240000	384550000	0	0	0	77477000	7566500	69910000
sp|P0A8S1|ARGP_ECOLI HTH-type transcriptional regulator ArgP OS=Escherichia coli (strain K12) OX=83333 GN=argP PE=1 SV=1;sp|C5A0I6|ARGP_ECOBW HTH-type transcriptional regulator ArgP OS=Escherichia coli (strain K12 / MC4100 / BW2952) OX=595496 GN=argP PE=3	P0A8S1	HTH-type transcriptional regulator ArgP	argP	0.35844	26.3861	0.35908	26.4208	0.37537	27.2923				9	8	6	4	9	8	6	4	37.4	33.471	483880000	335180000	148700000	453710000	342410000	111300000	681630000	470650000	210980000	202960000	47688000	155280000
sp|P0A8T7|RPOC_ECOLI DNA-directed RNA polymerase subunit beta OS=Escherichia coli (strain K12) OX=83333 GN=rpoC PE=1 SV=1;sp|B1XBZ0|RPOC_ECODH DNA-directed RNA polymerase subunit beta OS=Escherichia coli (strain K12 / DH10B) OX=316385 GN=rpoC PE=3 SV=1	P0A8T7	DNA-directed RNA polymerase subunit beta	rpoC	0.54082	35.0995	0.61653	38.1391	0.61852	38.2152	2.4706	71.1865		70	71	76	79	70	71	76	79	67.2	155.16	25941000000	15819000000	10123000000	25466000000	15520000000	9946700000	28801000000	17670000000	11131000000	23739000000	6759500000	16980000000
sp|P0A8U2|YAFD_ECOLI UPF0294 protein YafD OS=Escherichia coli (strain K12) OX=83333 GN=yafD PE=3 SV=1;sp|C4ZRU6|YAFD_ECOBW UPF0294 protein YafD OS=Escherichia coli (strain K12 / MC4100 / BW2952) OX=595496 GN=yafD PE=3 SV=1;sp|B1XD73|YAFD_ECODH UPF0294 prot	P0A8U2	UPF0294 protein YafD	yafD					0.62295	38.3838				2		3		2	1	3	1	24.8	29.991	0	0	0	0	0	0	59935000	38004000	21931000	0	0	0
sp|P0A8U6|METJ_ECOLI Met repressor OS=Escherichia coli (strain K12) OX=83333 GN=metJ PE=1 SV=2;sp|C5A0A5|METJ_ECOBW Met repressor OS=Escherichia coli (strain K12 / MC4100 / BW2952) OX=595496 GN=metJ PE=3 SV=1;sp|B1XBA4|METJ_ECODH Met repressor OS=Escherich	P0A8U6	Met repressor	metJ	0.69678	41.0648	0.70532	41.36	0.71114	41.5594	2.4775	71.2437		2	4	5	5	2	4	5	5	83.8	12.141	133620000	84575000	49047000	363570000	218770000	144800000	434160000	254720000	179440000	984270000	187580000	796690000
sp|P0A8V0|RBN_ECOLI Ribonuclease BN OS=Escherichia coli (strain K12) OX=83333 GN=rbn PE=1 SV=1;sp|C4ZUB1|RBN_ECOBW Ribonuclease BN OS=Escherichia coli (strain K12 / MC4100 / BW2952) OX=595496 GN=rbn PE=3 SV=1	P0A8V0	Ribonuclease BN	rbn													3	1	0	1	3	22.3	32.929	0	0	0	0	0	0	0	0	0	133930000	98804000	35129000
sp|P0A8V2|RPOB_ECOLI DNA-directed RNA polymerase subunit beta OS=Escherichia coli (strain K12) OX=83333 GN=rpoB PE=1 SV=1;sp|C5A0S7|RPOB_ECOBW DNA-directed RNA polymerase subunit beta OS=Escherichia coli (strain K12 / MC4100 / BW2952) OX=595496 GN=rpoB PE=	P0A8V2	DNA-directed RNA polymerase subunit beta	rpoB	0.56666	36.1699	0.58797	37.0265	0.64102	39.0623	2.646	72.5727		73	72	77	72	73	72	77	72	64.5	150.63	38784000000	24206000000	14579000000	33105000000	19870000000	13235000000	34473000000	21174000000	13299000000	37431000000	10303000000	27128000000
sp|P0A8V6|FADR_ECOLI Fatty acid metabolism regulator protein OS=Escherichia coli (strain K12) OX=83333 GN=fadR PE=1 SV=2;sp|C4ZTM8|FADR_ECOBW Fatty acid metabolism regulator protein OS=Escherichia coli (strain K12 / MC4100 / BW2952) OX=595496 GN=fadR PE=3	P0A8V6	Fatty acid metabolism regulator protein	fadR										4	2	2		4	2	2	0	12.6	26.968	21571000	21571000	0	11475000	11475000	0	0	0	0	0	0	0
sp|P0A8W0|NANR_ECOLI HTH-type transcriptional repressor NanR OS=Escherichia coli (strain K12) OX=83333 GN=nanR PE=1 SV=1;sp|C4ZSW4|NANR_ECOBW HTH-type transcriptional repressor NanR OS=Escherichia coli (strain K12 / MC4100 / BW2952) OX=595496 GN=nanR PE=3	P0A8W0	Transcriptional regulator NanR	nanR										2				2	1	1	1	18.6	29.524	111100000	89326000	21771000	0	0	0	0	0	0	0	0	0
sp|P0A8W2|SLYA_ECOLI Transcriptional regulator SlyA OS=Escherichia coli (strain K12) OX=83333 GN=slyA PE=3 SV=1;sp|C4ZYA5|SLYA_ECOBW Transcriptional regulator SlyA OS=Escherichia coli (strain K12 / MC4100 / BW2952) OX=595496 GN=slyA PE=3 SV=1;sp|B1XFV4|SLY	P0A8W2	Transcriptional regulator SlyA	slyA			0.58049	36.7285	0.5807	36.7369	2.7984	73.6731		4	3	2	4	4	3	2	4	38.2	16.353	150200000	100220000	49986000	170880000	106940000	63934000	194280000	120590000	73686000	643660000	173150000	470510000
sp|P0A8W5|YQGE_ECOLI UPF0301 protein YqgE OS=Escherichia coli (strain K12) OX=83333 GN=yqgE PE=1 SV=1;sp|C5A0L7|YQGE_ECOBW UPF0301 protein YqgE OS=Escherichia coli (strain K12 / MC4100 / BW2952) OX=595496 GN=yqgE PE=3 SV=1;sp|B1XFA8|YQGE_ECODH UPF0301 prot	P0A8W5	UPF0301 protein YqgE	yqgE										2	2	2	4	2	2	2	4	54	20.686	71055000	57648000	13408000	599570000	368850000	230730000	636490000	379440000	257050000	190580000	0	190580000
sp|P0A8W8|YFBU_ECOLI UPF0304 protein YfbU OS=Escherichia coli (strain K12) OX=83333 GN=yfbU PE=1 SV=1;sp|C4ZVI7|YFBU_ECOBW UPF0304 protein YfbU OS=Escherichia coli (strain K12 / MC4100 / BW2952) OX=595496 GN=yfbU PE=3 SV=1;sp|B1X905|YFBU_ECODH UPF0304 prot	P0A8W8	UPF0304 protein YfbU	yfbU	0.42647	29.8969	0.43041	30.09	0.43887	30.501	2.9362	74.5948		10	8	9	12	10	8	9	12	69.5	19.536	712470000	506980000	205490000	821020000	608740000	212290000	932150000	649770000	282380000	1016100000	210630000	805490000
sp|P0A8X0|YJGA_ECOLI UPF0307 protein YjgA OS=Escherichia coli (strain K12) OX=83333 GN=yjgA PE=1 SV=1;sp|C4ZRA8|YJGA_ECOBW UPF0307 protein YjgA OS=Escherichia coli (strain K12 / MC4100 / BW2952) OX=595496 GN=yjgA PE=3 SV=1;sp|B1XEL6|YJGA_ECODH UPF0307 prot	P0A8X0	UPF0307 protein YjgA	yjgA			0.67421	40.2703	0.71085	41.5495	3.5929	78.2273		4	5	5	8	4	5	5	8	42.1	21.359	65852000	55254000	10598000	394320000	250790000	143540000	490340000	337340000	153000000	1110200000	182170000	928010000
sp|P0A8X2|YCEI_ECOLI Protein YceI OS=Escherichia coli (strain K12) OX=83333 GN=yceI PE=1 SV=1	P0A8X2	Protein YceI	yceI	0.34875	25.8573	0.34878	25.8589	0.37736	27.3973	2.696	72.9437		7	8	7	10	7	8	7	10	76.4	20.912	2284100000	1754900000	529240000	2382700000	1764400000	618300000	1982000000	1468500000	513490000	3446300000	841170000	2605100000
sp|P0A8Y3|YIHX_ECOLI Alpha-D-glucose 1-phosphate phosphatase YihX OS=Escherichia coli (strain K12) OX=83333 GN=yihX PE=1 SV=1	P0A8Y3	Alpha-D-glucose-1-phosphate phosphatase YihX	yihX													2	0	0	0	2	13.1	22.732	0	0	0	0	0	0	0	0	0	15987000	5787000	10200000
sp|P0A8Y5|YIDA_ECOLI Sugar phosphatase YidA OS=Escherichia coli (strain K12) OX=83333 GN=yidA PE=1 SV=1	P0A8Y5	Sugar phosphatase YidA	yidA			0.4202	29.5874	0.42385	29.7679	2.4681	71.1658			2	2	8	0	2	2	8	44.1	29.721	0	0	0	113900000	75640000	38263000	214620000	146640000	67974000	623930000	104250000	519680000
sp|P0A8Y8|ENTH_ECOLI Proofreading thioesterase EntH OS=Escherichia coli (strain K12) OX=83333 GN=entH PE=1 SV=1	P0A8Y8	Proofreading thioesterase EntH	entH										3	3	3	2	3	3	3	2	35.8	14.97	209590000	209590000	0	140410000	140410000	0	216110000	216110000	0	0	0	0
sp|P0A901|BLC_ECOLI Outer membrane lipoprotein Blc OS=Escherichia coli (strain K12) OX=83333 GN=blc PE=1 SV=1	P0A901	Outer membrane lipoprotein Blc	blc	0.68426	40.6267	0.66457	39.9244	0.5677	36.2123	2.7515	73.344		6	6	7	4	6	6	7	4	58.8	19.851	1458000000	864220000	593800000	1440700000	842010000	598660000	1325300000	859370000	465900000	433560000	115400000	318160000
sp|P0A903|BAMC_ECOLI Outer membrane protein assembly factor BamC OS=Escherichia coli (strain K12) OX=83333 GN=bamC PE=1 SV=1	P0A903	Outer membrane protein assembly factor BamC	bamC	0.32958	24.7883	0.35257	26.0667	0.3694	26.9753	2.5479	71.8143		17	16	16	11	17	16	16	11	66.6	36.842	10714000000	7983600000	2730400000	9543400000	6883000000	2660400000	11489000000	8061200000	3427700000	3261700000	853790000	2407900000
sp|P0A905|SLYB_ECOLI Outer membrane lipoprotein SlyB OS=Escherichia coli (strain K12) OX=83333 GN=slyB PE=2 SV=1	P0A905	Outer membrane lipoprotein SlyB	slyB	0.49332	33.0351	0.5118	33.8537	0.50086	33.3715	2.8003	73.6863		8	10	8	7	8	10	8	7	45.8	15.601	24205000000	15757000000	8448200000	25930000000	17028000000	8901300000	26599000000	20748000000	5851100000	11551000000	2604600000	8946700000
sp|P0A908|MIPA_ECOLI MltA-interacting protein OS=Escherichia coli (strain K12) OX=83333 GN=mipA PE=1 SV=1	P0A908	MltA-interacting protein	mipA	0.40264	28.7059	0.44013	30.5618	0.46456	31.7201	2.3296	69.9664		11	12	10	10	11	12	10	10	67.7	27.831	15919000000	11128000000	4790500000	17223000000	11704000000	5519100000	16779000000	11175000000	5604000000	6259100000	1917300000	4341800000
sp|P0A910|OMPA_ECOLI Outer membrane protein A OS=Escherichia coli (strain K12) OX=83333 GN=ompA PE=1 SV=1	P0A910	Outer membrane protein A	ompA	0.47243	32.0851	0.50282	33.4584	0.4862	32.7143	2.7343	73.2212		28	29	28	26	28	29	28	26	73.1	37.2	139480000000	95391000000	44088000000	139480000000	91600000000	47883000000	120070000000	99057000000	21014000000	81776000000	18717000000	63059000000
sp|P0A912|PAL_ECOLI Peptidoglycan-associated lipoprotein OS=Escherichia coli (strain K12) OX=83333 GN=pal PE=1 SV=1	P0A912	Peptidoglycan-associated lipoprotein	pal	0.31969	24.2246	0.3559	26.2482	0.37497	27.2711	2.3142	69.8268		13	12	13	12	13	12	13	12	74	18.824	31123000000	23723000000	7400800000	40496000000	32186000000	8310400000	38339000000	32648000000	5690800000	10900000000	1725000000	9175200000
sp|P0A917|OMPX_ECOLI Outer membrane protein X OS=Escherichia coli (strain K12) OX=83333 GN=ompX PE=1 SV=1	P0A917	Outer membrane protein X	ompX	0.81616	44.9388	0.85733	46.1593	0.78439	43.9584	2.9849	74.9053		9	7	10	10	9	7	10	10	68.4	18.602	34848000000	18569000000	16279000000	29894000000	16238000000	13656000000	34227000000	18894000000	15333000000	19840000000	4838100000	15001000000
sp|P0A921|PA1_ECOLI Phospholipase A1 OS=Escherichia coli (strain K12) OX=83333 GN=pldA PE=1 SV=1	P0A921	Phospholipase A1	pldA	0.49404	33.0674	0.51645	34.0565	0.52576	34.4589	2.1744	68.498		7	9	6	4	7	9	6	4	47.1	33.163	934210000	630880000	303340000	1137700000	798530000	339190000	1042800000	635740000	407040000	227530000	62810000	164720000
sp|P0A927|TSX_ECOLI Nucleoside-specific channel-forming protein Tsx OS=Escherichia coli (strain K12) OX=83333 GN=tsx PE=1 SV=1	P0A927	Nucleoside-specific channel-forming protein tsx	tsx	0.34569	25.6887	0.40433	28.7917	0.42058	29.6062	1.431	58.8647		8	7	9	4	8	7	9	4	52	33.589	6676900000	4805800000	1871100000	6238600000	4271600000	1967000000	6854000000	4547700000	2306300000	970820000	369210000	601610000
sp|P0A930|WZA_ECOLI Putative polysaccharide export protein wza OS=Escherichia coli (strain K12) OX=83333 GN=wza PE=3 SV=1	P0A930	Putative polysaccharide export protein wza	wza										3	6	7		3	6	7	0	32.5	41.909	0	0	0	59766000	24477000	35289000	114430000	26795000	87636000	0	0	0
sp|P0A935|MLTA_ECOLI Membrane-bound lytic murein transglycosylase A OS=Escherichia coli (strain K12) OX=83333 GN=mltA PE=1 SV=1	P0A935	Membrane-bound lytic murein transglycosylase A	mltA										4	2	2	5	4	2	2	5	22.7	40.41	40766000	26962000	13804000	20666000	20666000	0	39167000	23225000	15942000	0	0	0
sp|P0A937|BAME_ECOLI Outer membrane protein assembly factor BamE OS=Escherichia coli (strain K12) OX=83333 GN=bamE PE=1 SV=1	P0A937	Outer membrane protein assembly factor BamE	bamE							1.4049	58.4182					2	1	1	1	2	48.7	12.302	253950000	209060000	44886000	194260000	149800000	44462000	379780000	317000000	62779000	98838000	38873000	59965000
sp|P0A940|BAMA_ECOLI Outer membrane protein assembly factor BamA OS=Escherichia coli (strain K12) OX=83333 GN=bamA PE=1 SV=1;sp|C4ZRR9|BAMA_ECOBW Outer membrane protein assembly factor BamA OS=Escherichia coli (strain K12 / MC4100 / BW2952) OX=595496 GN=ba	P0A940	Outer membrane protein assembly factor BamA	bamA	0.31351	23.8681	0.33449	25.065	0.33615	25.1581	2.5452	71.7928		49	46	49	41	49	46	49	41	69.9	90.552	32955000000	24664000000	8290400000	34178000000	24995000000	9182900000	35314000000	26113000000	9201300000	11811000000	3332600000	8478100000
sp|P0A948|RIMJ_ECOLI Ribosomal-protein-alanine acetyltransferase OS=Escherichia coli (strain K12) OX=83333 GN=rimJ PE=3 SV=1	P0A948	Ribosomal-protein-alanine acetyltransferase	rimJ	0.58315	36.8348	0.61418	38.049	0.57769	36.6162				4	5	6	3	4	5	6	3	36.1	22.688	267290000	160730000	106550000	203140000	137990000	65148000	257620000	179240000	78378000	91667000	15960000	75707000
sp|P0A951|ATDA_ECOLI Spermidine N(1)-acetyltransferase OS=Escherichia coli (strain K12) OX=83333 GN=speG PE=1 SV=2	P0A951	Spermidine N(1)-acetyltransferase	speG	0.53749	34.9589	0.58331	36.8412	0.5632	36.0287				8	7	10	5	8	7	10	5	56.5	21.887	1278400000	864340000	414080000	971320000	658890000	312430000	1013600000	680890000	332740000	464960000	102850000	362110000
sp|P0A955|ALKH_ECOLI KHG/KDPG aldolase OS=Escherichia coli (strain K12) OX=83333 GN=eda PE=1 SV=1	P0A955	KHG/KDPG aldolase;4-hydroxy-2-oxoglutarate aldolase;2-dehydro-3-deoxy-phosphogluconate aldolase	eda	0.43555	30.3403	0.49073	32.9188	0.48867	32.8259	2.6873	72.8799		8	7	8	10	8	7	8	10	59.6	22.284	3509200000	2501400000	1007700000	2507500000	1635900000	871600000	6717000000	4766200000	1950700000	12897000000	3516100000	9380500000
sp|P0A959|ALAA_ECOLI Glutamate-pyruvate aminotransferase AlaA OS=Escherichia coli (strain K12) OX=83333 GN=alaA PE=1 SV=1	P0A959	Glutamate-pyruvate aminotransferase AlaA	alaA	0.41067	29.1117	0.47763	32.3241	0.44665	30.8748	2.7028	72.9934		12	9	10	6	12	9	10	6	45.9	45.517	949980000	676180000	273800000	581790000	329380000	252410000	1019200000	713390000	305820000	279620000	75179000	204440000
sp|P0A962|ASPG1_ECOLI L-asparaginase 1 OS=Escherichia coli (strain K12) OX=83333 GN=ansA PE=1 SV=1	P0A962	L-asparaginase 1	ansA			0.42039	29.5968						5	6	6	3	5	6	6	3	30.8	37.127	182460000	161780000	20683000	212640000	147370000	65269000	86105000	71695000	14410000	88905000	26285000	62620000
sp|P0A968|CSPD_ECOLI Cold shock-like protein CspD OS=Escherichia coli (strain K12) OX=83333 GN=cspD PE=1 SV=1	P0A968	Cold shock-like protein CspD	cspD	1.0785	51.8884	1.264	55.8304	1.1502	53.4927	3.7371	78.89		2	2	3	2	2	2	3	2	78.4	7.9689	413150000	186160000	226990000	427470000	192710000	234750000	465750000	213470000	252280000	576320000	115480000	460840000
sp|P0A972|CSPE_ECOLI Cold shock-like protein CspE OS=Escherichia coli (strain K12) OX=83333 GN=cspE PE=1 SV=2	P0A972	Cold shock-like protein CspE	cspE			0.40088	28.6163	0.40599	28.8757	2.4216	70.7739		4	4	4	3	4	4	4	3	78.3	7.4634	1300300000	790750000	509520000	1547800000	989750000	558070000	1379900000	898720000	481180000	6078100000	1744800000	4333400000
sp|P0A988|DPO3B_ECOLI Beta sliding clamp OS=Escherichia coli (strain K12) OX=83333 GN=dnaN PE=1 SV=1;sp|P0A988-2|DPO3B_ECOLI Isoform Beta* of Beta sliding clamp OS=Escherichia coli (strain K12) OX=83333 GN=dnaN	P0A988	DNA polymerase III subunit beta	dnaN	0.55085	35.5192	0.54382	35.2256	0.56941	36.2818	2.8629	74.1127		10	8	8	7	10	8	8	7	47.3	40.586	615770000	381440000	234330000	581240000	372890000	208340000	390930000	221130000	169800000	609300000	151780000	457530000
sp|P0A991|ALF1_ECOLI Fructose-bisphosphate aldolase class 1 OS=Escherichia coli (strain K12) OX=83333 GN=fbaB PE=1 SV=2	P0A991	Fructose-bisphosphate aldolase class 1	fbaB	0.687	40.7232	0.72461	42.0159	0.70661	41.4043	3.0093	75.058		15	15	15	16	15	15	15	16	66.3	38.109	7201100000	4095500000	3105600000	9420400000	5446700000	3973700000	8967100000	5123600000	3843500000	13296000000	3224500000	10071000000
sp|P0A993|F16PA_ECOLI Fructose-1,6-bisphosphatase class 1 OS=Escherichia coli (strain K12) OX=83333 GN=fbp PE=1 SV=1;sp|B1XEL4|F16PA_ECODH Fructose-1,6-bisphosphatase class 1 OS=Escherichia coli (strain K12 / DH10B) OX=316385 GN=fbp PE=3 SV=1	P0A993	Fructose-1,6-bisphosphatase class 1	fbp	0.60306	37.6193	0.66662	39.9983	0.63856	38.9708	2.48	71.2644		14	13	14	11	14	13	14	11	52.4	36.833	4062300000	2534700000	1527600000	3275400000	1947500000	1327800000	3386300000	1988500000	1397800000	2271100000	528280000	1742800000
sp|P0A998|FTNA_ECOLI Bacterial non-heme ferritin OS=Escherichia coli (strain K12) OX=83333 GN=ftnA PE=1 SV=1	P0A998	Bacterial non-heme ferritin	ftnA	1.1947	54.4357	0.96995	49.2373	1.0579	51.4068				4	6	5	5	4	6	5	5	45.5	19.424	669110000	280970000	388130000	1701800000	869550000	832220000	644170000	281330000	362850000	457180000	77311000	379870000
sp|P0A9A6|FTSZ_ECOLI Cell division protein FtsZ OS=Escherichia coli (strain K12) OX=83333 GN=ftsZ PE=1 SV=1	P0A9A6	Cell division protein FtsZ	ftsZ	0.72785	42.1246	0.78269	43.905	0.77071	43.5255	3.9088	79.6284		26	27	27	20	26	27	27	20	65.8	40.323	35122000000	19747000000	15375000000	28654000000	15768000000	12886000000	34677000000	19115000000	15561000000	15430000000	3155600000	12274000000
sp|P0A9A9|FUR_ECOLI Ferric uptake regulation protein OS=Escherichia coli (strain K12) OX=83333 GN=fur PE=1 SV=1	P0A9A9	Ferric uptake regulation protein	fur			0.69446	40.9841			1.4754	59.6025			3	2	4	1	3	2	4	47.3	16.795	185970000	118410000	67562000	287240000	164360000	122880000	403010000	312130000	90879000	572390000	268520000	303870000
sp|P0A9B2|G3P1_ECOLI Glyceraldehyde-3-phosphate dehydrogenase A OS=Escherichia coli (strain K12) OX=83333 GN=gapA PE=1 SV=2	P0A9B2	Glyceraldehyde-3-phosphate dehydrogenase A	gapA	0.37026	27.0211	0.38941	28.027	0.40723	28.9384	2.4481	70.9985		22	23	25	31	22	23	25	31	90	35.532	94543000000	66862000000	27681000000	98333000000	67352000000	30981000000	104530000000	74362000000	30168000000	138590000000	38412000000	100180000000
sp|P0A9B6|E4PD_ECOLI D-erythrose-4-phosphate dehydrogenase OS=Escherichia coli (strain K12) OX=83333 GN=epd PE=1 SV=2;sp|C5A0J7|E4PD_ECOBW D-erythrose-4-phosphate dehydrogenase OS=Escherichia coli (strain K12 / MC4100 / BW2952) OX=595496 GN=epd PE=3 SV=1;s	P0A9B6	D-erythrose-4-phosphate dehydrogenase	epd										2	2	3		2	2	3	1	26	37.299	192700000	111000000	81701000	116940000	64141000	52797000	0	0	0	45083000	0	45083000
sp|P0A9C3|GALM_ECOLI Aldose 1-epimerase OS=Escherichia coli (strain K12) OX=83333 GN=galM PE=1 SV=1	P0A9C3	Aldose 1-epimerase	galM	0.57175	36.3767	0.56625	36.1532	0.53041	34.658	2.9368	74.5987		6	8	7	11	6	8	7	11	45.1	38.19	895430000	551340000	344090000	953210000	602080000	351140000	966170000	630410000	335760000	3302000000	830930000	2471100000
sp|P0A9C5|GLN1B_ECOLI Glutamine synthetase OS=Escherichia coli (strain K12) OX=83333 GN=glnA PE=1 SV=2	P0A9C5	Glutamine synthetase	glnA	0.48612	32.7107	0.61966	38.2586	0.64861	39.3428	1.999	66.6556		29	30	29	28	29	30	29	28	84.9	51.903	52052000000	33928000000	18124000000	63118000000	37324000000	25794000000	68276000000	40014000000	28262000000	37700000000	11944000000	25755000000
sp|P0A9C9|GLPX_ECOLI Fructose-1,6-bisphosphatase 1 class 2 OS=Escherichia coli (strain K12) OX=83333 GN=glpX PE=1 SV=1	P0A9C9	Fructose-1,6-bisphosphatase 1 class 2	glpX										6	6	3	3	6	6	3	3	34.8	35.852	87392000	25114000	62278000	213040000	113170000	99865000	20311000	20311000	0	0	0	0
sp|P0A9D2|GSTA_ECOLI Glutathione S-transferase GstA OS=Escherichia coli (strain K12) OX=83333 GN=gstA PE=1 SV=1	P0A9D2	Glutathione S-transferase GstA	gstA	0.46161	31.5823	0.53238	34.742	0.54378	35.2239	3.1177	75.7146		6	7	7	10	6	7	7	10	79.1	22.868	1152200000	774030000	378220000	820490000	617600000	202890000	842070000	603860000	238210000	3793700000	614290000	3179400000
sp|P0A9D4|CYSE_ECOLI Serine acetyltransferase OS=Escherichia coli (strain K12) OX=83333 GN=cysE PE=1 SV=1	P0A9D4	Serine acetyltransferase	cysE					0.55043	35.5018				3		6		3	1	6	1	34.1	29.316	344970000	269590000	75386000	0	0	0	171520000	112130000	59384000	0	0	0
sp|P0A9D8|DAPD_ECOLI 2,3,4,5-tetrahydropyridine-2,6-dicarboxylate N-succinyltransferase OS=Escherichia coli (strain K12) OX=83333 GN=dapD PE=1 SV=1;sp|C4ZRQ8|DAPD_ECOBW 2,3,4,5-tetrahydropyridine-2,6-dicarboxylate N-succinyltransferase OS=Escherichia coli	P0A9D8	2,3,4,5-tetrahydropyridine-2,6-dicarboxylate N-succinyltransferase	dapD	0.32195	24.3542	0.34494	25.6472	0.36106	26.5279	2.4858	71.3122		15	18	17	21	15	18	17	21	59.5	29.892	2366700000	1764100000	602610000	2743000000	1979300000	763670000	2764900000	2051800000	713090000	6851800000	1928200000	4923700000
sp|P0A9E5|FNR_ECOLI Fumarate and nitrate reduction regulatory protein OS=Escherichia coli (strain K12) OX=83333 GN=fnr PE=1 SV=1	P0A9E5	Fumarate and nitrate reduction regulatory protein	fnr												2		1	1	2	1	11.2	27.967	0	0	0	0	0	0	0	0	0	0	0	0
sp|P0A9F3|CYSB_ECOLI HTH-type transcriptional regulator CysB OS=Escherichia coli (strain K12) OX=83333 GN=cysB PE=3 SV=1	P0A9F3	HTH-type transcriptional regulator CysB	cysB	0.52347	34.3604	0.60481	37.6873	0.627	38.5372	2.5993	72.2168		8	6	7	9	8	6	7	9	41.4	36.15	660010000	350310000	309710000	313840000	184760000	129080000	543820000	316080000	227740000	656490000	175780000	480720000
sp|P0A9F9|METR_ECOLI HTH-type transcriptional regulator MetR OS=Escherichia coli (strain K12) OX=83333 GN=metR PE=1 SV=1	P0A9F9	HTH-type transcriptional regulator MetR	metR	1.4272	58.8003			1.6365	62.0709				5	3	6		5	3	6	0	33.1	35.629	441460000	126100000	315350000	105600000	36433000	69166000	116690000	40308000	76380000	0	0	0
sp|P0A9G2|NHAR_ECOLI Transcriptional activator protein NhaR OS=Escherichia coli (strain K12) OX=83333 GN=nhaR PE=1 SV=1	P0A9G2	Transcriptional activator protein NhaR	nhaR													2	0	0	1	2	14.6	34.284	0	0	0	0	0	0	0	0	0	44381000	11067000	33314000
sp|P0A9G6|ACEA_ECOLI Isocitrate lyase OS=Escherichia coli (strain K12) OX=83333 GN=aceA PE=1 SV=1	P0A9G6	Isocitrate lyase	aceA	0.39135	28.1274	0.41371	29.2641	0.41743	29.4498	2.9481	74.6714		25	26	26	28	25	26	26	28	69.1	47.521	41602000000	29810000000	11792000000	48714000000	34179000000	14535000000	45651000000	32113000000	13537000000	68351000000	16400000000	51951000000
sp|P0A9G8|MODE_ECOLI Transcriptional regulator ModE OS=Escherichia coli (strain K12) OX=83333 GN=modE PE=1 SV=1	P0A9G8	Transcriptional regulator ModE	modE													2	1	0	1	2	22.1	28.281	0	0	0	0	0	0	0	0	0	10659000	0	10659000
sp|P0A9H1|MUG_ECOLI G/U mismatch-specific DNA glycosylase OS=Escherichia coli (strain K12) OX=83333 GN=mug PE=1 SV=1;sp|C4ZQY5|MUG_ECOBW G/U mismatch-specific DNA glycosylase OS=Escherichia coli (strain K12 / MC4100 / BW2952) OX=595496 GN=mug PE=3 SV=1;sp|	P0A9H1	G/U mismatch-specific DNA glycosylase	mug	0.37085	27.0526	0.38067	27.5714	0.37782	27.4216	3.3083	76.789		9	7	9	4	9	7	9	4	81.5	18.673	1919500000	1376800000	542670000	1941500000	1385500000	556000000	2027000000	1457800000	569190000	1091500000	139700000	951820000
sp|P0A9H7|CFA_ECOLI Cyclopropane-fatty-acyl-phospholipid synthase OS=Escherichia coli (strain K12) OX=83333 GN=cfa PE=1 SV=2	P0A9H7	Cyclopropane-fatty-acyl-phospholipid synthase	cfa	2.946	74.6579	2.0369	67.0717	2.7522	73.349	4.1132	80.4428		15	14	17	10	15	14	17	10	42.1	43.909	1824100000	505020000	1319100000	1014300000	233640000	780710000	1738400000	378390000	1360000000	896490000	112450000	784040000
sp|P0A9I3|GCVR_ECOLI Glycine cleavage system transcriptional repressor OS=Escherichia coli (strain K12) OX=83333 GN=gcvR PE=1 SV=2	P0A9I3	Glycine cleavage system transcriptional repressor	gcvR	0.53588	34.8907					2.5925	72.1642		2	2	3	4	2	2	3	4	55.3	20.768	532160000	323690000	208470000	79691000	48982000	30709000	91655000	66588000	25067000	271630000	77958000	193670000
sp|P0A9J0|RNG_ECOLI Ribonuclease G OS=Escherichia coli (strain K12) OX=83333 GN=rng PE=1 SV=2	P0A9J0	Ribonuclease G	rng	0.41337	29.2471	0.45089	31.0768	0.42119	29.6364	2.851	74.0327		10	11	14	10	10	11	14	10	48.1	55.364	1024100000	708220000	315860000	989730000	696170000	293560000	909010000	635740000	273280000	425060000	102240000	322820000
sp|P0A9J4|PANE_ECOLI 2-dehydropantoate 2-reductase OS=Escherichia coli (strain K12) OX=83333 GN=panE PE=1 SV=1	P0A9J4	2-dehydropantoate 2-reductase	panE										2				2	1	1	1	11.6	33.87	49870000	49870000	0	0	0	0	0	0	0	28330000	0	28330000
sp|P0A9J8|PHEA_ECOLI P-protein OS=Escherichia coli (strain K12) OX=83333 GN=pheA PE=1 SV=1	P0A9J8	P-protein;Chorismate mutase;Prephenate dehydratase	pheA	0.26261	20.799	0.28306	22.0613	0.2863	22.2576	2.3608	70.2452		17	13	15	12	17	13	15	12	48.7	43.111	3205600000	2582200000	623370000	2605500000	2104000000	501420000	2388000000	1858200000	529840000	1427200000	314660000	1112600000
sp|P0A9K3|PHOL_ECOLI PhoH-like protein OS=Escherichia coli (strain K12) OX=83333 GN=ybeZ PE=1 SV=2	P0A9K3	PhoH-like protein	ybeZ	0.43478	30.3029	0.48338	32.5864	0.4822	32.5327	2.814	73.7808		21	18	21	18	21	18	21	18	69.4	39.038	8970900000	6239600000	2731200000	7945000000	5310500000	2634500000	7928800000	5572000000	2356800000	6673900000	1611400000	5062400000
sp|P0A9K7|PHOU_ECOLI Phosphate-specific transport system accessory protein PhoU OS=Escherichia coli (strain K12) OX=83333 GN=phoU PE=1 SV=1	P0A9K7	Phosphate-specific transport system accessory protein PhoU	phoU	0.86748	46.4519	0.9249	48.0492	0.92216	47.9752	3.8315	79.3025		11	9	10	3	11	9	10	3	61.4	27.417	1560800000	804660000	756120000	1548800000	808750000	740010000	1956700000	959970000	996770000	93503000	24045000	69458000
sp|P0A9K9|SLYD_ECOLI FKBP-type peptidyl-prolyl cis-trans isomerase SlyD OS=Escherichia coli (strain K12) OX=83333 GN=slyD PE=1 SV=1	P0A9K9	FKBP-type peptidyl-prolyl cis-trans isomerase SlyD	slyD	0.44331	30.7148	0.44439	30.7666	0.46246	31.6221	2.5918	72.1588		2	3	3	3	2	3	3	3	43.4	20.853	1540800000	941620000	599210000	1356900000	839340000	517540000	1490400000	981770000	508670000	3436600000	864020000	2572500000
sp|P0A9L3|FKBB_ECOLI FKBP-type 22 kDa peptidyl-prolyl cis-trans isomerase OS=Escherichia coli (strain K12) OX=83333 GN=fklB PE=1 SV=2	P0A9L3	FKBP-type 22 kDa peptidyl-prolyl cis-trans isomerase	fklB	0.39615	28.3745			0.40526	28.8388	2.4945	71.3836		6	7	7	11	6	7	7	11	38.8	22.216	853750000	610800000	242950000	366560000	261420000	105130000	479370000	337630000	141730000	1569400000	449600000	1119800000
sp|P0A9L5|PPIC_ECOLI Peptidyl-prolyl cis-trans isomerase C OS=Escherichia coli (strain K12) OX=83333 GN=ppiC PE=1 SV=2	P0A9L5	Peptidyl-prolyl cis-trans isomerase C	ppiC	0.43465	30.2966	0.40986	29.071	0.43535	30.3306	2.6488	72.5937		3	5	4	4	3	5	4	4	67.7	10.232	417490000	292180000	125310000	607890000	440550000	167340000	692430000	476750000	215670000	1522500000	319060000	1203400000
sp|P0A9L8|P5CR_ECOLI Pyrroline-5-carboxylate reductase OS=Escherichia coli (strain K12) OX=83333 GN=proC PE=1 SV=1	P0A9L8	Pyrroline-5-carboxylate reductase	proC	0.55041	35.5009	0.56195	35.9775	0.61969	38.2598	1.9592	66.2071		3	4	5	7	3	4	5	7	37.5	28.145	1527200000	1037800000	489340000	1520500000	1078500000	442040000	948000000	564850000	383150000	1576500000	405560000	1170900000
sp|P0A9M0|LON_ECOLI Lon protease OS=Escherichia coli (strain K12) OX=83333 GN=lon PE=1 SV=1	P0A9M0	Lon protease	lon	0.43865	30.4904	0.48895	32.8386	0.49017	32.8936	2.6238	72.4047		34	31	28	23	34	31	28	23	56.4	87.437	10504000000	7044800000	3459600000	7458000000	4874800000	2583200000	9505000000	6141100000	3363900000	7612200000	2459400000	5152900000
sp|P0A9M2|HPRT_ECOLI Hypoxanthine phosphoribosyltransferase OS=Escherichia coli (strain K12) OX=83333 GN=hpt PE=1 SV=1	P0A9M2	Hypoxanthine phosphoribosyltransferase	hpt	0.36387	26.6792	0.52724	34.5224	0.5096	33.7573	2.1072	67.8167		4	5	5	8	4	5	5	8	59.6	20.115	437960000	365670000	72284000	565810000	392950000	172860000	606860000	417730000	189130000	546750000	187040000	359700000
sp|P0A9M5|XGPT_ECOLI Xanthine phosphoribosyltransferase OS=Escherichia coli (strain K12) OX=83333 GN=gpt PE=1 SV=1;sp|C4ZT95|XGPT_ECOBW Xanthine phosphoribosyltransferase OS=Escherichia coli (strain K12 / MC4100 / BW2952) OX=595496 GN=gpt PE=3 SV=1;sp|B1XD	P0A9M5	Xanthine phosphoribosyltransferase	gpt	0.55644	35.7508	0.6269	38.5334	0.67308	40.23	2.4172	70.7363		4	3	4	4	4	3	4	4	26.3	16.97	254610000	174140000	80470000	243990000	153640000	90354000	269970000	160300000	109670000	191460000	56206000	135250000
sp|P0A9M8|PTA_ECOLI Phosphate acetyltransferase OS=Escherichia coli (strain K12) OX=83333 GN=pta PE=1 SV=2	P0A9M8	Phosphate acetyltransferase	pta	0.51741	34.0982	0.53763	34.9648	0.53002	34.6414	2.8927	74.3109		25	20	25	31	25	20	25	31	60.6	77.171	5209800000	3429600000	1780200000	4228000000	2821200000	1406700000	4444500000	2890900000	1553500000	7271700000	1757800000	5513900000
sp|P0A9N4|PFLA_ECOLI Pyruvate formate-lyase 1-activating enzyme OS=Escherichia coli (strain K12) OX=83333 GN=pflA PE=1 SV=2	P0A9N4	Pyruvate formate-lyase 1-activating enzyme	pflA	0.57135	36.3605			0.57831	36.6411	2.1161	67.9086		7	5	8	3	7	5	8	3	51.6	28.204	615540000	388350000	227200000	230630000	230630000	0	604380000	413870000	190510000	189180000	46664000	142520000
sp|P0A9P0|DLDH_ECOLI Dihydrolipoyl dehydrogenase OS=Escherichia coli (strain K12) OX=83333 GN=lpdA PE=1 SV=2	P0A9P0	Dihydrolipoyl dehydrogenase	lpdA	0.40213	28.6799	0.43466	30.2971	0.43171	30.1535	2.2792	69.5048		22	24	24	23	22	24	24	23	64.8	50.688	38690000000	27251000000	11440000000	43687000000	29409000000	14277000000	42693000000	28759000000	13935000000	16320000000	3515400000	12804000000
sp|P0A9P4|TRXB_ECOLI Thioredoxin reductase OS=Escherichia coli (strain K12) OX=83333 GN=trxB PE=1 SV=2	P0A9P4	Thioredoxin reductase	trxB	0.41868	29.5119	0.44374	30.7355	0.4381	30.4638	2.5358	71.7179		11	9	10	12	11	9	10	12	61.4	34.623	519230000	354330000	164900000	315890000	137590000	178310000	409920000	280750000	129170000	2044900000	598710000	1446200000
sp|P0A9P6|DEAD_ECOLI ATP-dependent RNA helicase DeaD OS=Escherichia coli (strain K12) OX=83333 GN=deaD PE=1 SV=2	P0A9P6	ATP-dependent RNA helicase DeaD	deaD	0.49116	32.9381	0.61329	38.0149	0.64786	39.3152	2.5466	71.804		23	23	20	18	23	23	20	18	55	70.545	6231400000	4072800000	2158600000	5652700000	3358700000	2294000000	3400400000	1942500000	1457800000	1829800000	581990000	1247800000
sp|P0A9Q1|ARCA_ECOLI Aerobic respiration control protein ArcA OS=Escherichia coli (strain K12) OX=83333 GN=arcA PE=1 SV=1;tr|A5PFK0|A5PFK0_ECOLI Disrupted ArcA (Fragment) OS=Escherichia coli (strain K12) OX=83333 GN=arcA2 PE=4 SV=1	P0A9Q1	Aerobic respiration control protein ArcA	arcA;arcA2	0.57344	36.445	0.57806	36.6311	0.5287	34.5849	3.2327	76.3744		17	19	21	20	17	19	21	20	73.9	27.292	5188200000	3163400000	2024700000	4610300000	2829800000	1780500000	5116100000	3612700000	1503400000	5474800000	1417000000	4057800000
sp|P0A9Q5|ACCD_ECOLI Acetyl-coenzyme A carboxylase carboxyl transferase subunit beta OS=Escherichia coli (strain K12) OX=83333 GN=accD PE=1 SV=1;sp|B1X927|ACCD_ECODH Acetyl-coenzyme A carboxylase carboxyl transferase subunit beta OS=Escherichia coli (strai	P0A9Q5	Acetyl-coenzyme A carboxylase carboxyl transferase subunit beta	accD	0.38267	27.6762	0.42861	30.0019	0.45439	31.2427	2.0801	67.5335		16	16	18	11	16	16	18	11	75	33.322	3468100000	2464000000	1004100000	2806200000	1949500000	856760000	3871200000	2685700000	1185500000	1282600000	412480000	870100000
sp|P0A9Q7|ADHE_ECOLI Aldehyde-alcohol dehydrogenase OS=Escherichia coli (strain K12) OX=83333 GN=adhE PE=1 SV=2	P0A9Q7	Aldehyde-alcohol dehydrogenase;Alcohol dehydrogenase;Acetaldehyde dehydrogenase [acetylating];Pyruvate-formate-lyase deactivase	adhE	0.53017	34.6478	0.55997	35.8962	0.55108	35.5288	2.9552	74.7168		58	57	60	54	58	57	60	54	83.3	96.126	92574000000	58854000000	33720000000	92262000000	57589000000	34673000000	97033000000	60548000000	36485000000	67262000000	16089000000	51173000000
sp|P0A9Q9|DHAS_ECOLI Aspartate-semialdehyde dehydrogenase OS=Escherichia coli (strain K12) OX=83333 GN=asd PE=1 SV=1	P0A9Q9	Aspartate-semialdehyde dehydrogenase	asd	0.30701	23.4895	0.31563	23.9908	0.31609	24.0174	2.5156	71.5554		11	14	14	20	11	14	14	20	68.4	40.017	8002700000	6110200000	1892500000	10870000000	8080400000	2789400000	7341000000	5710900000	1630100000	31090000000	8590900000	22499000000
sp|P0A9R7|FTSE_ECOLI Cell division ATP-binding protein FtsE OS=Escherichia coli (strain K12) OX=83333 GN=ftsE PE=1 SV=1	P0A9R7	Cell division ATP-binding protein FtsE	ftsE	0.45224	31.1409	0.51017	33.7823	0.47948	32.4087	2.543	71.7753		9	13	13	8	9	13	13	8	76.6	24.439	1048400000	704980000	343430000	1236300000	833030000	403260000	1066300000	715160000	351140000	471740000	124350000	347380000
sp|P0A9S1|FUCO_ECOLI Lactaldehyde reductase OS=Escherichia coli (strain K12) OX=83333 GN=fucO PE=1 SV=2	P0A9S1	Lactaldehyde reductase	fucO										2		2		2	1	2	1	11.8	40.513	0	0	0	0	0	0	0	0	0	144400000	38369000	106030000
sp|P0A9S3|GATD_ECOLI Galactitol 1-phosphate 5-dehydrogenase OS=Escherichia coli (strain K12) OX=83333 GN=gatD PE=1 SV=1	P0A9S3	Galactitol-1-phosphate 5-dehydrogenase	gatD										6	4	6		6	4	6	0	26	37.39	97739000	53035000	44703000	18306000	0	18306000	141460000	86897000	54563000	0	0	0
sp|P0A9S5|GLDA_ECOLI Glycerol dehydrogenase OS=Escherichia coli (strain K12) OX=83333 GN=gldA PE=1 SV=1	P0A9S5	Glycerol dehydrogenase	gldA													2	1	1	0	2	7.6	38.712	0	0	0	0	0	0	0	0	0	89905000	0	89905000
sp|P0A9S7|LIVG_ECOLI High-affinity branched-chain amino acid transport ATP-binding protein LivG OS=Escherichia coli (strain K12) OX=83333 GN=livG PE=3 SV=1	P0A9S7	High-affinity branched-chain amino acid transport ATP-binding protein LivG	livG	0.25864	20.5492	0.30784	23.538	0.3088	23.5941				16	15	16	4	16	15	16	4	81.6	28.427	887130000	696100000	191030000	1262800000	966580000	296180000	1578800000	1240500000	338380000	88509000	30476000	58033000
sp|P0A9T0|SERA_ECOLI D-3-phosphoglycerate dehydrogenase OS=Escherichia coli (strain K12) OX=83333 GN=serA PE=1 SV=2	P0A9T0	D-3-phosphoglycerate dehydrogenase	serA	0.32245	24.3828	0.35747	26.3335	0.36362	26.6658	2.5632	71.9353		23	24	20	24	23	24	20	24	63.2	44.175	49764000000	36570000000	13193000000	41753000000	29776000000	11977000000	39637000000	28634000000	11003000000	42116000000	11616000000	30500000000
sp|P0A9T4|TAS_ECOLI Protein tas OS=Escherichia coli (strain K12) OX=83333 GN=tas PE=1 SV=1	P0A9T4	Protein tas	tas	0.53204	34.7276	0.54032	35.0784	0.45713	31.3719	2.6875	72.8814		13	11	12	8	13	11	12	8	45.4	38.499	2782800000	1719300000	1063600000	2076800000	1234000000	842830000	3413900000	2048300000	1365600000	1107200000	192890000	914290000
sp|P0A9T6|YBAQ_ECOLI Uncharacterized HTH-type transcriptional regulator YbaQ OS=Escherichia coli (strain K12) OX=83333 GN=ybaQ PE=1 SV=1	P0A9T6	Uncharacterized HTH-type transcriptional regulator YbaQ	ybaQ													2	0	0	0	2	17.7	13.171	0	0	0	0	0	0	0	0	0	62697000	0	62697000
sp|P0A9T8|YBBA_ECOLI Uncharacterized ABC transporter ATP-binding protein YbbA OS=Escherichia coli (strain K12) OX=83333 GN=ybbA PE=3 SV=1	P0A9T8	Uncharacterized ABC transporter ATP-binding protein YbbA	ybbA					0.55583	35.7256				2	2	2		2	2	2	1	21.9	24.533	58241000	36969000	21272000	130840000	59890000	70951000	177600000	115660000	61934000	80185000	17868000	62317000
sp|P0A9U1|YBHF_ECOLI Probable multidrug ABC transporter ATP-binding protein YbhF OS=Escherichia coli (strain K12) OX=83333 GN=ybhF PE=1 SV=1	P0A9U1	Uncharacterized ABC transporter ATP-binding protein YbhF	ybhF										3	3	2		3	3	2	0	8	63.132	437810000	335880000	101930000	47401000	47401000	0	0	0	0	0	0	0
sp|P0A9U3|YBIT_ECOLI Uncharacterized ABC transporter ATP-binding protein YbiT OS=Escherichia coli (strain K12) OX=83333 GN=ybiT PE=1 SV=1	P0A9U3	Uncharacterized ABC transporter ATP-binding protein YbiT	ybiT	0.35863	26.3964	0.44012	30.5613	0.37161	27.093	2.572	72.0045		16	10	13	14	16	10	13	14	46.6	59.857	1748700000	1312100000	436560000	1245500000	900480000	345000000	1202700000	768280000	434420000	1271700000	440850000	830810000
sp|P0A9V1|LPTB_ECOLI Lipopolysaccharide export system ATP-binding protein LptB OS=Escherichia coli (strain K12) OX=83333 GN=lptB PE=1 SV=2	P0A9V1	Lipopolysaccharide export system ATP-binding protein LptB	lptB	0.42669	29.9077	0.43109	30.1232	0.44388	30.7422	2.1684	68.4383		10	10	11	6	10	10	11	6	56.4	26.8	4220400000	2901900000	1318600000	3739500000	2543400000	1196100000	3312600000	2325500000	987040000	1247100000	426760000	820360000
sp|P0A9W0|ULAR_ECOLI HTH-type transcriptional regulator UlaR OS=Escherichia coli (strain K12) OX=83333 GN=ulaR PE=1 SV=1;sp|C4ZR68|ULAR_ECOBW HTH-type transcriptional regulator UlaR OS=Escherichia coli (strain K12 / MC4100 / BW2952) OX=595496 GN=ulaR PE=3	P0A9W0	HTH-type transcriptional regulator UlaR	ulaR	0.39088	28.1031								4	3	2	2	4	3	2	2	30.3	27.602	172600000	122630000	49968000	94968000	67219000	27749000	85666000	62021000	23645000	39779000	0	39779000
sp|P0A9W3|ETTA_ECOLI Energy-dependent translational throttle protein EttA OS=Escherichia coli (strain K12) OX=83333 GN=ettA PE=1 SV=2	P0A9W3	Energy-dependent translational throttle protein EttA	ettA	0.44028	30.5691	0.45474	31.2592	0.4693	31.9404	2.3078	69.7684		23	25	24	25	23	25	24	25	60.4	62.442	15092000000	10516000000	4576300000	10539000000	6966100000	3572900000	10192000000	6899900000	3291900000	7599100000	1971300000	5627900000
sp|P0A9W6|IBAG_ECOLI Acid stress protein IbaG OS=Escherichia coli (strain K12) OX=83333 GN=ibaG PE=1 SV=1	P0A9W6	Acid stress protein IbaG	ibaG													2	0	1	1	2	27.4	9.4516	0	0	0	44259000	26249000	18010000	78008000	44590000	33419000	154420000	42059000	112360000
sp|P0A9W9|YRDA_ECOLI Protein YrdA OS=Escherichia coli (strain K12) OX=83333 GN=yrdA PE=1 SV=1	P0A9W9	Protein YrdA	yrdA	0.4589	31.4552	0.50598	33.5981	0.5898	37.099	2.6049	72.26		4	4	3	7	4	4	3	7	69	20.245	415280000	263530000	151750000	484050000	309890000	174160000	302620000	158440000	144180000	1092700000	202970000	889710000
sp|P0A9X1|ZNUC_ECOLI Zinc import ATP-binding protein ZnuC OS=Escherichia coli (strain K12) OX=83333 GN=znuC PE=1 SV=1	P0A9X1	Zinc import ATP-binding protein ZnuC	znuC	0.15223	13.2118	0.29462	22.7573	0.23712	19.1671	3.9854	79.9414		8	6	7	8	8	6	7	8	43.8	27.867	1023500000	884010000	139490000	1247500000	977450000	270080000	1653200000	1305500000	347670000	1399800000	284310000	1115500000
sp|P0A9X4|MREB_ECOLI Rod shape-determining protein MreB OS=Escherichia coli (strain K12) OX=83333 GN=mreB PE=1 SV=1	P0A9X4	Rod shape-determining protein MreB	mreB	0.45474	31.2592	0.49598	33.1542	0.49742	33.2185	2.5546	71.8674		22	22	22	20	22	22	22	20	59.1	36.952	5163800000	3181300000	1982600000	4080900000	2149200000	1931700000	5469400000	3152800000	2316600000	3072200000	813690000	2258500000
sp|P0A9X9|CSPA_ECOLI Cold shock protein CspA OS=Escherichia coli (strain K12) OX=83333 GN=cspA PE=1 SV=2	P0A9X9	Cold shock protein CspA	cspA			0.31522	23.9671	0.30623	23.4438	0.52703	34.5134		4	3	3	4	3	2	2	3	67.1	7.4032	603040000	565370000	37678000	742440000	612620000	129820000	615450000	507050000	108400000	1252000000	781690000	470340000
sp|P0A9Y6|CSPC_ECOLI Cold shock-like protein CspC OS=Escherichia coli (strain K12) OX=83333 GN=cspC PE=1 SV=2	P0A9Y6	Cold shock-like protein CspC	cspC	0.38547	27.8223	0.42493	29.8211	0.4294	30.0406	2.4938	71.3779		4	4	4	4	4	4	4	4	78.3	7.4023	5055200000	3618400000	1436900000	5495400000	3756900000	1738500000	7628900000	5290800000	2338200000	19226000000	5093200000	14133000000
sp|P0A9Z1|GLNB_ECOLI Nitrogen regulatory protein P-II 1 OS=Escherichia coli (strain K12) OX=83333 GN=glnB PE=1 SV=1	P0A9Z1	Nitrogen regulatory protein P-II 1	glnB			0.30654	23.462						5	5	5	4	5	5	5	4	56.2	12.425	139390000	87778000	51616000	291080000	195100000	95982000	323170000	258030000	65146000	271990000	35681000	236310000
sp|P0AA04|PTHP_ECOLI Phosphocarrier protein HPr OS=Escherichia coli (strain K12) OX=83333 GN=ptsH PE=1 SV=1	P0AA04	Phosphocarrier protein HPr	ptsH	0.36523	26.7523	0.37212	27.1201	0.37453	27.2479	2.4626	71.12		3	4	3	4	3	4	3	4	78.8	9.1193	4800200000	3410300000	1389900000	5497500000	3809600000	1687800000	5718700000	4718100000	1000600000	16806000000	4683800000	12122000000
sp|P0AA10|RL13_ECOLI 50S ribosomal protein L13 OS=Escherichia coli (strain K12) OX=83333 GN=rplM PE=1 SV=1;sp|C4ZSW9|RL13_ECOBW 50S ribosomal protein L13 OS=Escherichia coli (strain K12 / MC4100 / BW2952) OX=595496 GN=rplM PE=3 SV=1;sp|B1XHK4|RL13_ECODH 50	P0AA10	50S ribosomal protein L13	rplM	0.44931	31.0016	0.48604	32.7071	0.4804	32.4507	2.2245	68.9874		15	15	14	15	15	15	14	15	76.1	16.018	28634000000	19357000000	9276200000	27123000000	17634000000	9489100000	32364000000	20704000000	11660000000	15933000000	4076800000	11856000000
sp|P0AA16|OMPR_ECOLI Transcriptional regulatory protein OmpR OS=Escherichia coli (strain K12) OX=83333 GN=ompR PE=1 SV=1	P0AA16	Transcriptional regulatory protein OmpR	ompR	0.59087	37.1413	0.59705	37.3846	0.578	36.6286	2.8492	74.0206		19	13	14	15	19	13	14	15	73.2	27.353	5649400000	3542900000	2106500000	3835000000	2290700000	1544300000	4223400000	2582500000	1640900000	2031700000	528950000	1502800000
sp|P0AA25|THIO_ECOLI Thioredoxin 1 OS=Escherichia coli (strain K12) OX=83333 GN=trxA PE=1 SV=2	P0AA25	Thioredoxin-1	trxA	0.52218	34.3047	0.52534	34.4408	0.52944	34.6166	2.5319	71.6866		5	5	5	6	5	5	5	6	58.7	11.806	2997900000	1737900000	1260100000	3723100000	2084100000	1639000000	3867900000	2129300000	1738600000	13157000000	3570400000	9586900000
sp|P0AA39|RLUC_ECOLI Ribosomal large subunit pseudouridine synthase C OS=Escherichia coli (strain K12) OX=83333 GN=rluC PE=1 SV=1	P0AA39	Ribosomal large subunit pseudouridine synthase C	rluC	0.34836	25.8358	0.39933	28.5372	0.47184	32.0578				4	5	4	4	4	5	4	4	28.2	36.026	419930000	312430000	107500000	500850000	371110000	129740000	393980000	275700000	118270000	38776000	15705000	23072000
sp|P0AA43|RSUA_ECOLI Ribosomal small subunit pseudouridine synthase A OS=Escherichia coli (strain K12) OX=83333 GN=rsuA PE=1 SV=1	P0AA43	Ribosomal small subunit pseudouridine synthase A	rsuA	0.40839	28.9969	0.44037	30.5734	0.45777	31.4021	3.034	75.2107		7	6	6	7	7	6	6	7	51.5	25.865	242470000	164290000	78182000	245930000	166230000	79691000	281140000	194590000	86554000	521100000	120080000	401020000
sp|P0AA47|PLAP_ECOLI Low-affinity putrescine importer PlaP OS=Escherichia coli (strain K12) OX=83333 GN=plaP PE=1 SV=1	P0AA47	Low-affinity putrescine importer PlaP	plaP	1.3805	57.992	1.6047	61.6079	1.764	63.8205				3	3	4		3	3	4	1	8.2	49.537	1135000000	457300000	677680000	1448100000	503260000	944820000	1703200000	563470000	1139700000	10394000	0	10394000
sp|P0AA53|QMCA_ECOLI Protein QmcA OS=Escherichia coli (strain K12) OX=83333 GN=qmcA PE=1 SV=1	P0AA53	Protein QmcA	qmcA	0.50484	33.5478	0.51687	34.0748	0.47936	32.4032	2.5375	71.7314		9	10	10	12	9	10	10	12	53.8	33.743	2711500000	2274900000	436640000	2686300000	2293400000	392890000	4420600000	3727400000	693210000	927010000	340570000	586430000
sp|P0AA82|CODB_ECOLI Cytosine permease OS=Escherichia coli (strain K12) OX=83333 GN=codB PE=1 SV=1	P0AA82	Cytosine permease	codB										4	4	4	2	4	4	4	2	9.8	43.649	274220000	274220000	0	252560000	252560000	0	357560000	290880000	66674000	0	0	0
sp|P0AA84|CLSB_ECOLI Cardiolipin synthase B OS=Escherichia coli (strain K12) OX=83333 GN=clsB PE=1 SV=1	P0AA84	Cardiolipin synthase B	clsB	0.94242	48.5178								6	4	4	2	6	4	4	2	19.1	47.633	359540000	194450000	165090000	129120000	29210000	99910000	229210000	124960000	104260000	111160000	0	111160000
sp|P0AA89|DOSC_ECOLI Diguanylate cyclase DosC OS=Escherichia coli (strain K12) OX=83333 GN=dosC PE=1 SV=1	P0AA89	Diguanylate cyclase DosC	dosC	0.52971	34.6281								3				3	1	0	0	11.3	53.177	689820000	505400000	184420000	25700000	25700000	0	0	0	0	0	0	0
sp|P0AA91|YEAY_ECOLI Uncharacterized lipoprotein YeaY OS=Escherichia coli (strain K12) OX=83333 GN=yeaY PE=3 SV=1	P0AA91	Uncharacterized lipoprotein YeaY	yeaY										4	2	2	4	4	2	2	4	47.2	20.921	187840000	133100000	54736000	188760000	107660000	81097000	203450000	124040000	79409000	52745000	12818000	39927000
sp|P0AA95|YACC_ECOLI Uncharacterized protein YacC OS=Escherichia coli (strain K12) OX=83333 GN=yacC PE=3 SV=1	P0AA95	Uncharacterized protein YacC	yacC													2	1	1	1	2	25.2	12.854	71682000	46061000	25621000	149720000	114110000	35609000	114670000	82473000	32197000	196320000	45276000	151040000
sp|P0AA99|YAFK_ECOLI Putative L,D-transpeptidase YafK OS=Escherichia coli (strain K12) OX=83333 GN=yafK PE=3 SV=1	P0AA99	Putative L,D-transpeptidase YafK	yafK							2.9447	74.6495					3	1	0	0	3	23.6	28.021	150920000	0	150920000	0	0	0	0	0	0	1064700000	284670000	780030000
sp|P0AAB4|UBID_ECOLI 3-octaprenyl-4-hydroxybenzoate carboxy-lyase OS=Escherichia coli (strain K12) OX=83333 GN=ubiD PE=1 SV=1	P0AAB4	3-octaprenyl-4-hydroxybenzoate carboxy-lyase	ubiD										5	5	4	6	5	5	4	6	16.9	55.603	232910000	153840000	79075000	335310000	228190000	107120000	331810000	217500000	114310000	125760000	8633400	117120000
sp|P0AAB6|GALF_ECOLI UTP--glucose-1-phosphate uridylyltransferase OS=Escherichia coli (strain K12) OX=83333 GN=galF PE=1 SV=1	P0AAB6	UTP--glucose-1-phosphate uridylyltransferase	galF	0.62131	38.3215	0.66167	39.8196	0.64975	39.3848	2.6426	72.5471		20	18	20	16	20	18	20	16	69	32.829	25319000000	15474000000	9844700000	18558000000	10748000000	7809900000	22451000000	13208000000	9243300000	6812400000	1798900000	5013500000
sp|P0AAB8|USPD_ECOLI Universal stress protein D OS=Escherichia coli (strain K12) OX=83333 GN=uspD PE=2 SV=1	P0AAB8	Universal stress protein D	uspD					0.47182	32.0569	3.9917	79.9667				3	5	1	0	3	5	42.3	16.293	89942000	64557000	25385000	0	0	0	203920000	153940000	49985000	1311900000	291840000	1020000000
sp|P0AAC0|USPE_ECOLI Universal stress protein E OS=Escherichia coli (strain K12) OX=83333 GN=uspE PE=1 SV=2	P0AAC0	Universal stress protein E	uspE	0.5626	36.0041	0.56272	36.009	0.49838	33.2613	3.4481	77.5185		8	8	9	10	8	8	9	10	56.6	35.706	4991200000	3148600000	1842600000	2921800000	1897300000	1024400000	3589500000	2371100000	1218400000	2961900000	695910000	2266000000
sp|P0AAE0|CYCA_ECOLI D-serine/D-alanine/glycine transporter OS=Escherichia coli (strain K12) OX=83333 GN=cycA PE=1 SV=1	P0AAE0	D-serine/D-alanine/glycine transporter	cycA			0.39862	28.501						3	3	2	2	3	3	2	2	6	51.659	626910000	429710000	197200000	726400000	497160000	229240000	657650000	467340000	190300000	292060000	79099000	212970000
sp|P0AAF6|ARTP_ECOLI Arginine transport ATP-binding protein ArtP OS=Escherichia coli (strain K12) OX=83333 GN=artP PE=1 SV=1	P0AAF6	Arginine transport ATP-binding protein ArtP	artP	0.43546	30.3359					1.8126	64.4457		4	3	4	3	4	3	4	3	26.4	27.022	378070000	257210000	120860000	152050000	97515000	54532000	559390000	492340000	67057000	134010000	47658000	86352000
sp|P0AAG0|DPPD_ECOLI Dipeptide transport ATP-binding protein DppD OS=Escherichia coli (strain K12) OX=83333 GN=dppD PE=1 SV=1	P0AAG0	Dipeptide transport ATP-binding protein DppD	dppD	0.41279	29.2181	0.46338	31.665	0.5217	34.284				15	12	12	2	15	12	12	2	52.9	35.844	1398400000	1034100000	364210000	723590000	381670000	341930000	1170800000	818290000	352510000	0	0	0
sp|P0AAG3|GLTL_ECOLI Glutamate/aspartate import ATP-binding protein GltL OS=Escherichia coli (strain K12) OX=83333 GN=gltL PE=3 SV=1	P0AAG3	Glutamate/aspartate transport ATP-binding protein GltL	gltL			0.37115	27.0685	0.36139	26.5457				3	3	4		3	3	4	1	25.7	26.661	408470000	380490000	27983000	506630000	415440000	91190000	654330000	485670000	168650000	0	0	0
sp|P0AAG8|MGLA_ECOLI Galactose/methyl galactoside import ATP-binding protein MglA OS=Escherichia coli (strain K12) OX=83333 GN=mglA PE=1 SV=1	P0AAG8	Galactose/methyl galactoside import ATP-binding protein MglA	mglA	0.42264	29.7081								3				3	1	1	0	10.7	56.415	110420000	87696000	22727000	23516000	23516000	0	27296000	27296000	0	0	0	0
sp|P0AAH0|PSTB_ECOLI Phosphate import ATP-binding protein PstB OS=Escherichia coli (strain K12) OX=83333 GN=pstB PE=1 SV=2	P0AAH0	Phosphate import ATP-binding protein PstB	pstB	0.66846	40.0645	0.6049	37.6908	0.63716	38.9186				8	9	9	3	8	9	9	3	51	29.027	1453700000	738660000	715070000	1658700000	1035700000	622930000	2220400000	1325000000	895330000	178580000	29209000	149370000
sp|P0AAH4|SAPD_ECOLI Putrescine export system ATP-binding protein SapD OS=Escherichia coli (strain K12) OX=83333 GN=sapD PE=1 SV=1	P0AAH4	Peptide transport system ATP-binding protein SapD	sapD			0.50021	33.3427						4	4	4	2	4	4	4	2	24.8	37.66	61465000	42983000	18482000	113440000	74128000	39312000	59597000	45356000	14241000	20228000	7153300	13074000
sp|P0AAH8|SAPF_ECOLI Putrescine export system ATP-binding protein SapF OS=Escherichia coli (strain K12) OX=83333 GN=sapF PE=1 SV=1	P0AAH8	Peptide transport system ATP-binding protein SapF	sapF					0.43915	30.5145				2	3	3		2	3	3	0	17.2	30.57	49019000	49019000	0	123280000	109600000	13677000	145680000	98394000	47283000	0	0	0
sp|P0AAI1|SSUB_ECOLI Aliphatic sulfonates import ATP-binding protein SsuB OS=Escherichia coli (strain K12) OX=83333 GN=ssuB PE=1 SV=1	P0AAI1	Aliphatic sulfonates import ATP-binding protein SsuB	ssuB	1.2698	55.9433								4	5	3		4	5	3	0	26.7	27.738	402250000	198810000	203450000	249330000	99390000	149940000	279910000	118230000	161680000	0	0	0
sp|P0AAI3|FTSH_ECOLI ATP-dependent zinc metalloprotease FtsH OS=Escherichia coli (strain K12) OX=83333 GN=ftsH PE=1 SV=1	P0AAI3	ATP-dependent zinc metalloprotease FtsH	ftsH	0.42517	29.8329	0.45445	31.2455	0.46175	31.5888	2.7209	73.1248		43	41	42	40	43	41	42	40	70.2	70.707	16674000000	11709000000	4965300000	18576000000	12739000000	5837300000	19087000000	12921000000	6166400000	7381000000	1654400000	5726700000
sp|P0AAJ5|FDOH_ECOLI Formate dehydrogenase-O iron-sulfur subunit OS=Escherichia coli (strain K12) OX=83333 GN=fdoH PE=1 SV=1	P0AAJ5	Formate dehydrogenase-O iron-sulfur subunit	fdoH	0.6228	38.3781	0.78224	43.8908	0.93906	48.4286				5	7	7		4	6	6	0	26.7	33.1	740220000	453800000	286420000	627310000	340480000	286840000	641250000	321550000	319700000	0	0	0
sp|P0AAN5|YAIA_ECOLI Uncharacterized protein YaiA OS=Escherichia coli (strain K12) OX=83333 GN=yaiA PE=1 SV=1	P0AAN5	Uncharacterized protein YaiA	yaiA							3.349	77.0062					2	0	0	0	2	33.3	7.2811	0	0	0	0	0	0	0	0	0	182950000	41745000	141210000
sp|P0AAN9|IRAP_ECOLI Anti-adapter protein IraP OS=Escherichia coli (strain K12) OX=83333 GN=iraP PE=1 SV=1;sp|C4ZTE1|IRAP_ECOBW Anti-adapter protein IraP OS=Escherichia coli (strain K12 / MC4100 / BW2952) OX=595496 GN=iraP PE=3 SV=1;sp|B1XEX1|IRAP_ECODH An	P0AAN9	Anti-adapter protein IraP	iraP											2			1	2	1	1	46.5	9.9374	48707000	25854000	22853000	107610000	88122000	19486000	68012000	38448000	29564000	151840000	35416000	116420000
sp|P0AAR3|YBAK_ECOLI Cys-tRNA(Pro)/Cys-tRNA(Cys) deacylase YbaK OS=Escherichia coli (strain K12) OX=83333 GN=ybaK PE=1 SV=1	P0AAR3	Cys-tRNA(Pro)/Cys-tRNA(Cys) deacylase YbaK	ybaK					0.3881	27.9591	2.6741	72.7825			2	3	7	1	2	3	7	61	17.093	38660000	38660000	0	118440000	91237000	27207000	235460000	117320000	118140000	1248400000	230070000	1018300000
sp|P0AAS7|YBCJ_ECOLI Uncharacterized protein YbcJ OS=Escherichia coli (strain K12) OX=83333 GN=ybcJ PE=1 SV=1	P0AAS7	Uncharacterized protein YbcJ	ybcJ			0.70403	41.3156			1.6507	62.2741			3	2	5	1	3	2	5	82.9	7.3895	0	0	0	95824000	55061000	40763000	109260000	68946000	40314000	815660000	266380000	549280000
sp|P0AAT4|YBDG_ECOLI Miniconductance mechanosensitive channel YbdG OS=Escherichia coli (strain K12) OX=83333 GN=ybdG PE=1 SV=1	P0AAT4	Miniconductance mechanosensitive channel YbdG	ybdG	0.52563	34.4533			0.62944	38.6292				4	2	5	3	4	2	5	3	22.4	46.602	463000000	312980000	150020000	63045000	36770000	26275000	576830000	342090000	234740000	79610000	19027000	60582000
sp|P0AAT6|IOJAP_ECOLI Ribosomal silencing factor RsfS OS=Escherichia coli (strain K12) OX=83333 GN=rsfS PE=1 SV=1	P0AAT6	Ribosomal silencing factor RsfS	rsfS			0.5135	33.928	0.51951	34.1893				4	4	4	4	4	4	4	4	44.8	11.582	342860000	283030000	59828000	473880000	299410000	174470000	558270000	352280000	205980000	435450000	80195000	355250000
sp|P0AAT9|YBEL_ECOLI Uncharacterized protein YbeL OS=Escherichia coli (strain K12) OX=83333 GN=ybeL PE=4 SV=1	P0AAT9	Uncharacterized protein YbeL	ybeL										2	2	2		2	2	2	1	22.5	18.797	105250000	54371000	50881000	0	0	0	0	0	0	0	0	0
sp|P0AAV6|YBGS_ECOLI Uncharacterized protein YbgS OS=Escherichia coli (strain K12) OX=83333 GN=ybgS PE=3 SV=1	P0AAV6	Uncharacterized protein YbgS	ybgS	1.4984	59.9744	1.4644	59.4222	1.4482	59.1537	3.8519	79.3895		4	4	4	2	4	4	4	2	16.7	12.872	721760000	103610000	618150000	698940000	148880000	550060000	597360000	139230000	458120000	420690000	90103000	330590000
sp|P0AAW1|YBHP_ECOLI Uncharacterized protein YbhP OS=Escherichia coli (strain K12) OX=83333 GN=ybhP PE=4 SV=1	P0AAW1	Uncharacterized protein YbhP	ybhP										5	5	4		5	5	4	0	25.3	28.789	229120000	14247000	214870000	108250000	50624000	57629000	0	0	0	0	0	0
sp|P0AAX3|YBIJ_ECOLI Uncharacterized protein YbiJ OS=Escherichia coli (strain K12) OX=83333 GN=ybiJ PE=3 SV=1	P0AAX3	Uncharacterized protein YbiJ	ybiJ							4.7002	82.4568					2	0	0	0	2	43	8.5676	0	0	0	0	0	0	0	0	0	883120000	152360000	730770000
sp|P0AAX8|YBIS_ECOLI Probable L,D-transpeptidase YbiS OS=Escherichia coli (strain K12) OX=83333 GN=ybiS PE=1 SV=1	P0AAX8	Probable L,D-transpeptidase YbiS	ybiS	0.5797	36.6968	0.63969	39.0129	0.66715	40.0174	2.6926	72.9188		11	12	11	11	10	11	10	10	62.1	33.325	3450000000	2033400000	1416700000	3596100000	2209300000	1386800000	3392500000	2098200000	1294300000	3524100000	820860000	2703300000
sp|P0AAZ4|RARA_ECOLI Replication-associated recombination protein A OS=Escherichia coli (strain K12) OX=83333 GN=rarA PE=1 SV=1	P0AAZ4	Replication-associated recombination protein A	rarA										2	2	4	3	2	2	4	3	17.9	49.626	50013000	50013000	0	48016000	48016000	0	181880000	157000000	24879000	39868000	0	39868000
sp|P0AB10|YMBA_ECOLI Uncharacterized lipoprotein YmbA OS=Escherichia coli (strain K12) OX=83333 GN=ymbA PE=3 SV=2	P0AB10	Uncharacterized lipoprotein YmbA	ymbA	0.49757	33.2252	0.50137	33.3942	0.47962	32.4151	2.5048	71.4677		5	5	5	4	5	5	5	4	49.7	20.634	851610000	635550000	216060000	734910000	486960000	247950000	839100000	534920000	304170000	199440000	47574000	151870000
sp|P0AB12|YCCF_ECOLI Inner membrane protein YccF OS=Escherichia coli (strain K12) OX=83333 GN=yccF PE=1 SV=1	P0AB12	Inner membrane protein YccF	yccF			0.4293	30.0357	0.47036	31.9894				3	4	4		3	4	4	1	29.7	16.275	445630000	336300000	109330000	798360000	536020000	262340000	806140000	529650000	276490000	396090000	102430000	293660000
sp|P0AB14|YCCJ_ECOLI Uncharacterized protein YccJ OS=Escherichia coli (strain K12) OX=83333 GN=yccJ PE=1 SV=1	P0AB14	Uncharacterized protein YccJ	yccJ	0.86021	46.2426	0.81983	45.0498	0.80259	44.5243	3.8873	79.5388		4	4	4	5	4	4	4	5	73.3	8.5244	632550000	307410000	325140000	711200000	358850000	352360000	615590000	319740000	295850000	2388900000	427140000	1961700000
sp|P0AB24|EFEO_ECOLI Iron uptake system component EfeO OS=Escherichia coli (strain K12) OX=83333 GN=efeO PE=1 SV=1	P0AB24	Iron uptake system component EfeO	efeO	0.052912	5.0253	0.089788	8.23903	0.13202	11.6623	3.0147	75.0915		11	13	16	18	11	13	16	18	70.7	41.137	2185800000	2117500000	68230000	3163500000	3009600000	153870000	3691300000	3302500000	388820000	7532000000	1754100000	5777900000
sp|P0AB26|YCEB_ECOLI Uncharacterized lipoprotein YceB OS=Escherichia coli (strain K12) OX=83333 GN=yceB PE=1 SV=1	P0AB26	Uncharacterized lipoprotein YceB	yceB	0.54518	35.2826	0.59086	37.1409	0.59833	37.4347	2.746	73.3049		7	6	6	5	7	6	6	5	65.6	20.5	3291900000	2162900000	1129000000	3719600000	2323900000	1395800000	2910100000	1819900000	1090200000	429940000	106040000	323890000
sp|P0AB28|YCED_ECOLI Large ribosomal RNA subunit accumulation protein YceD OS=Escherichia coli (strain K12) OX=83333 GN=yceD PE=2 SV=1	P0AB28	Uncharacterized protein YceD	yceD							2.5167	71.5643		3	3	4	6	3	3	4	6	27.7	19.315	121930000	84094000	37833000	160460000	106180000	54277000	143230000	97813000	45422000	362250000	84248000	278000000
sp|P0AB35|YCFJ_ECOLI Uncharacterized protein YcfJ OS=Escherichia coli (strain K12) OX=83333 GN=ycfJ PE=4 SV=1	P0AB35	Uncharacterized protein YcfJ	ycfJ	2.654	72.6327	2.2261	69.0028	1.9824	66.47				5	5	5		5	5	5	0	52.5	18.92	238140000	61621000	176510000	310310000	104050000	206260000	378890000	127030000	251860000	0	0	0
sp|P0AB38|LPOB_ECOLI Penicillin-binding protein activator LpoB OS=Escherichia coli (strain K12) OX=83333 GN=lpoB PE=1 SV=1	P0AB38	Penicillin-binding protein activator LpoB	lpoB	0.47507	32.2066	0.46981	31.964	0.45744	31.3865	2.9	74.359		6	6	7	7	6	6	7	7	39.9	22.515	949720000	638370000	311350000	1151100000	789990000	361140000	1274800000	921900000	352930000	600930000	135700000	465230000
sp|P0AB40|BHSA_ECOLI Multiple stress resistance protein BhsA OS=Escherichia coli (strain K12) OX=83333 GN=bhsA PE=1 SV=1	P0AB40	Multiple stress resistance protein BhsA	bhsA							5.1218	83.6649					4	0	0	0	4	58.8	8.8149	0	0	0	0	0	0	0	0	0	2124200000	273000000	1851200000
sp|P0AB43|YCGL_ECOLI Protein YcgL OS=Escherichia coli (strain K12) OX=83333 GN=ycgL PE=1 SV=3;sp|C4ZTM0|YCGL_ECOBW Protein YcgL OS=Escherichia coli (strain K12 / MC4100 / BW2952) OX=595496 GN=ycgL PE=3 SV=1;sp|B1XA66|YCGL_ECODH Protein YcgL OS=Escherichia	P0AB43	Protein YcgL	ycgL							2.7906	73.619		3		3	6	3	1	3	6	64.8	12.414	86538000	63847000	22691000	72166000	49857000	22309000	77686000	77686000	0	769970000	187870000	582110000
sp|P0AB46|YMGD_ECOLI Uncharacterized protein YmgD OS=Escherichia coli (strain K12) OX=83333 GN=ymgD PE=1 SV=2	P0AB46	Uncharacterized protein YmgD	ymgD											2	3		1	2	3	1	50.5	11.852	34973000	0	34973000	0	0	0	49136000	16342000	32794000	8308000	0	8308000
sp|P0AB52|YCHN_ECOLI Protein YchN OS=Escherichia coli (strain K12) OX=83333 GN=ychN PE=1 SV=1	P0AB52	Protein YchN	ychN													2	1	1	1	2	29.9	12.693	0	0	0	0	0	0	0	0	0	0	0	0
sp|P0AB55|YCII_ECOLI Protein YciI OS=Escherichia coli (strain K12) OX=83333 GN=yciI PE=1 SV=1	P0AB55	Protein YciI	yciI										2	2	3	2	2	2	3	2	30.6	10.602	0	0	0	26784000	26784000	0	81738000	81738000	0	0	0	0
sp|P0AB58|LAPB_ECOLI Lipopolysaccharide assembly protein B OS=Escherichia coli (strain K12) OX=83333 GN=lapB PE=1 SV=1	P0AB58	Lipopolysaccharide assembly protein B	lapB			0.52063	34.2378	0.56059	35.9217				2	2	4		2	2	4	0	13.9	44.531	44011000	32564000	11447000	208460000	131150000	77306000	131590000	85929000	45664000	0	0	0
sp|P0AB61|YCIN_ECOLI Protein YciN OS=Escherichia coli (strain K12) OX=83333 GN=yciN PE=1 SV=1	P0AB61	Protein YciN	yciN	0.66809	40.0512			0.65569	39.6022	3.3453	76.9866		4	2	3	5	4	2	3	5	85.5	9.3855	237700000	144840000	92868000	114800000	71257000	43541000	265910000	158340000	107560000	1443600000	194910000	1248700000
sp|P0AB67|PNTB_ECOLI NAD(P) transhydrogenase subunit beta OS=Escherichia coli (strain K12) OX=83333 GN=pntB PE=1 SV=1	P0AB67	NAD(P) transhydrogenase subunit beta	pntB	0.30619	23.4415	0.3144	23.9197	0.32496	24.526	2.3753	70.373		12	11	12	11	12	11	12	11	24.7	48.722	29006000000	21738000000	7267900000	26331000000	19712000000	6618700000	28756000000	21257000000	7498600000	8675700000	2554300000	6121400000
sp|P0AB71|ALF_ECOLI Fructose-bisphosphate aldolase class 2 OS=Escherichia coli (strain K12) OX=83333 GN=fbaA PE=1 SV=2	P0AB71	Fructose-bisphosphate aldolase class 2	fbaA	0.38681	27.8921	0.43592	30.3582	0.42542	29.8452	2.5727	72.01		16	15	18	19	16	15	18	19	67.4	39.147	18487000000	12964000000	5523100000	20906000000	14132000000	6773800000	24595000000	16815000000	7780100000	47657000000	11632000000	36025000000
sp|P0AB77|KBL_ECOLI 2-amino-3-ketobutyrate coenzyme A ligase OS=Escherichia coli (strain K12) OX=83333 GN=kbl PE=1 SV=1	P0AB77	2-amino-3-ketobutyrate coenzyme A ligase	kbl												2	2	0	0	2	2	9	43.117	0	0	0	0	0	0	65968000	43946000	22023000	87791000	19978000	67812000
sp|P0AB80|ILVE_ECOLI Branched-chain-amino-acid aminotransferase OS=Escherichia coli (strain K12) OX=83333 GN=ilvE PE=1 SV=2	P0AB80	Branched-chain-amino-acid aminotransferase	ilvE					0.46017	31.5148	2.5963	72.1936		5	7	5	8	5	7	5	8	33	34.093	406110000	266250000	139860000	88697000	59548000	29149000	399030000	269920000	129110000	976600000	298500000	678100000
sp|P0AB89|PUR8_ECOLI Adenylosuccinate lyase OS=Escherichia coli (strain K12) OX=83333 GN=purB PE=1 SV=1	P0AB89	Adenylosuccinate lyase	purB	0.43158	30.1471	0.50316	33.4735	0.4965	33.1774	2.2962	69.662		19	18	20	27	19	18	20	27	51.1	51.542	4645200000	3124700000	1520500000	5221800000	3412100000	1809700000	5622900000	3705000000	1917900000	9583500000	2796700000	6786800000
sp|P0AB91|AROG_ECOLI Phospho-2-dehydro-3-deoxyheptonate aldolase, Phe-sensitive OS=Escherichia coli (strain K12) OX=83333 GN=aroG PE=1 SV=1	P0AB91	Phospho-2-dehydro-3-deoxyheptonate aldolase, Phe-sensitive	aroG	0.24863	19.9122	0.28774	22.3446	0.28962	22.4578	2.5348	71.7099		19	19	21	20	18	18	20	19	83.4	38.009	33624000000	26089000000	7535600000	25613000000	19297000000	6316100000	29043000000	22058000000	6984800000	18725000000	5247200000	13478000000
sp|P0AB96|ARSC_ECOLI Arsenate reductase OS=Escherichia coli (strain K12) OX=83333 GN=arsC PE=3 SV=1	P0AB96	Arsenate reductase	arsC													3	1	1	0	3	27.7	15.853	423250000	277740000	145500000	441980000	303740000	138250000	0	0	0	32884000	10628000	22255000
sp|P0ABA0|ATPF_ECOLI ATP synthase subunit b OS=Escherichia coli (strain K12) OX=83333 GN=atpF PE=1 SV=1;sp|B1X9W4|ATPF_ECODH ATP synthase subunit b OS=Escherichia coli (strain K12 / DH10B) OX=316385 GN=atpF PE=3 SV=1	P0ABA0	ATP synthase subunit b	atpF	0.38283	27.6845	0.43247	30.1905	0.44384	30.7402	2.0863	67.5987		9	10	10	10	9	10	10	10	59.6	17.264	42965000000	30490000000	12475000000	42576000000	29279000000	13297000000	44611000000	30708000000	13903000000	11103000000	3431500000	7671500000
sp|P0ABA4|ATPD_ECOLI ATP synthase subunit delta OS=Escherichia coli (strain K12) OX=83333 GN=atpH PE=1 SV=1;sp|C4ZZ13|ATPD_ECOBW ATP synthase subunit delta OS=Escherichia coli (strain K12 / MC4100 / BW2952) OX=595496 GN=atpH PE=3 SV=1;sp|B1X9W3|ATPD_ECODH	P0ABA4	ATP synthase subunit delta	atpH	0.39633	28.3837	0.4333	30.2309	0.42279	29.7156	1.8792	65.2681		9	10	9	11	9	10	9	11	85.3	19.332	4976400000	3419700000	1556700000	5409600000	3727000000	1682600000	6560600000	4457900000	2102700000	1092900000	221790000	871110000
sp|P0ABA6|ATPG_ECOLI ATP synthase gamma chain OS=Escherichia coli (strain K12) OX=83333 GN=atpG PE=1 SV=1;sp|C4ZZ11|ATPG_ECOBW ATP synthase gamma chain OS=Escherichia coli (strain K12 / MC4100 / BW2952) OX=595496 GN=atpG PE=3 SV=1;sp|B1X9W1|ATPG_ECODH ATP	P0ABA6	ATP synthase gamma chain	atpG	0.39199	28.1604	0.4357	30.3476	0.44324	30.7115	2.2158	68.9035		20	19	21	18	20	19	21	18	84.7	31.577	31130000000	22092000000	9038300000	34029000000	23366000000	10663000000	37165000000	25727000000	11438000000	8906400000	2599400000	6307000000
sp|P0ABB0|ATPA_ECOLI ATP synthase subunit alpha OS=Escherichia coli (strain K12) OX=83333 GN=atpA PE=1 SV=1;sp|C4ZZ12|ATPA_ECOBW ATP synthase subunit alpha OS=Escherichia coli (strain K12 / MC4100 / BW2952) OX=595496 GN=atpA PE=3 SV=1;sp|B1X9W2|ATPA_ECODH	P0ABB0	ATP synthase subunit alpha	atpA	0.37083	27.0515	0.41252	29.2045	0.42419	29.7846	2.1496	68.2499		38	37	38	32	38	37	38	32	71.3	55.221	82442000000	57275000000	25167000000	76451000000	51466000000	24985000000	88598000000	60072000000	28526000000	22799000000	7015200000	15784000000
sp|P0ABB4|ATPB_ECOLI ATP synthase subunit beta OS=Escherichia coli (strain K12) OX=83333 GN=atpD PE=1 SV=2;sp|C4ZZ10|ATPB_ECOBW ATP synthase subunit beta OS=Escherichia coli (strain K12 / MC4100 / BW2952) OX=595496 GN=atpD PE=3 SV=1;sp|B1X9W0|ATPB_ECODH AT	P0ABB4	ATP synthase subunit beta	atpD	0.36404	26.6884	0.39747	28.4421	0.40805	28.9798	2.1706	68.4602		38	35	41	37	38	35	41	37	93.5	50.325	75693000000	53533000000	22161000000	73888000000	51048000000	22840000000	79629000000	54762000000	24867000000	27747000000	8945700000	18801000000
sp|P0ABB8|ATMA_ECOLI Magnesium-transporting ATPase, P-type 1 OS=Escherichia coli (strain K12) OX=83333 GN=mgtA PE=1 SV=1	P0ABB8	Magnesium-transporting ATPase, P-type 1	mgtA	0.36029	26.4863	0.38532	27.8145	0.3634	26.654				10	11	12	2	10	11	12	2	23.9	99.465	919290000	674390000	244900000	924810000	641990000	282820000	1023600000	673740000	349820000	71142000	25078000	46064000
sp|P0ABC3|HFLC_ECOLI Modulator of FtsH protease HflC OS=Escherichia coli (strain K12) OX=83333 GN=hflC PE=1 SV=1	P0ABC3	Modulator of FtsH protease HflC	hflC	0.37941	27.5052	0.40938	29.0468	0.40934	29.0448	2.5563	71.8809		26	27	26	22	26	27	26	22	74.3	37.649	15979000000	11719000000	4259800000	15997000000	11572000000	4425600000	15084000000	10722000000	4362200000	5069200000	1524200000	3545000000
sp|P0ABC7|HFLK_ECOLI Modulator of FtsH protease HflK OS=Escherichia coli (strain K12) OX=83333 GN=hflK PE=1 SV=1	P0ABC7	Modulator of FtsH protease HflK	hflK	0.38372	27.731	0.41411	29.2841	0.4401	30.5604	2.5405	71.7554		24	25	26	17	24	25	26	17	65.6	45.544	7585300000	5577200000	2008100000	7609000000	5309400000	2299600000	8844400000	6219000000	2625400000	3108900000	725670000	2383200000
sp|P0ABC9|BETT_ECOLI High-affinity choline transport protein OS=Escherichia coli (strain K12) OX=83333 GN=betT PE=2 SV=1	P0ABC9	High-affinity choline transport protein	betT										2				2	0	0	1	3.7	75.841	0	0	0	0	0	0	0	0	0	0	0	0
sp|P0ABD3|BFR_ECOLI Bacterioferritin OS=Escherichia coli (strain K12) OX=83333 GN=bfr PE=1 SV=1	P0ABD3	Bacterioferritin	bfr	1.4583	59.3215	1.5385	60.6067	1.4837	59.7375	1.3773	57.9355		5	5	6	3	5	5	6	3	48.7	18.495	3418900000	1405100000	2013800000	3531600000	1351300000	2180300000	3033100000	1261200000	1771900000	776650000	311810000	464840000
sp|P0ABD8|BCCP_ECOLI Biotin carboxyl carrier protein of acetyl-CoA carboxylase OS=Escherichia coli (strain K12) OX=83333 GN=accB PE=1 SV=1	P0ABD8	Biotin carboxyl carrier protein of acetyl-CoA carboxylase	accB							2.5062	71.4791		2	4	3	5	2	4	3	5	42.9	16.687	253720000	253720000	0	703700000	703700000	0	456590000	356660000	99934000	2452300000	635240000	1817100000
sp|P0ABE2|BOLA_ECOLI DNA-binding transcriptional regulator BolA OS=Escherichia coli (strain K12) OX=83333 GN=bolA PE=1 SV=1	P0ABE2	Protein BolA	bolA													2	1	1	1	2	32.4	11.994	0	0	0	0	0	0	0	0	0	0	0	0
sp|P0ABF1|PCNB_ECOLI Poly(A) polymerase I OS=Escherichia coli (strain K12) OX=83333 GN=pcnB PE=1 SV=2	P0ABF1	Poly(A) polymerase I	pcnB	0.44557	30.8231	0.48956	32.8661	0.51852	34.1464	2.7339	73.2184		8	7	11	7	8	7	11	7	41.7	53.87	376690000	256160000	120520000	216730000	143370000	73351000	541230000	394910000	146320000	529780000	181320000	348450000
sp|P0ABF6|CDD_ECOLI Cytidine deaminase OS=Escherichia coli (strain K12) OX=83333 GN=cdd PE=1 SV=1;sp|C4ZSM3|CDD_ECOBW Cytidine deaminase OS=Escherichia coli (strain K12 / MC4100 / BW2952) OX=595496 GN=cdd PE=3 SV=1;sp|B1X7N2|CDD_ECODH Cytidine deaminase OS	P0ABF6	Cytidine deaminase	cdd			0.71469	41.6804			2.6888	72.8909		3	7	2	7	3	7	2	7	49.7	31.54	0	0	0	594710000	330300000	264400000	0	0	0	1546800000	309720000	1237100000
sp|P0ABG7|RODA_ECOLI Peptidoglycan glycosyltransferase MrdB OS=Escherichia coli (strain K12) OX=83333 GN=mrdB PE=1 SV=1	P0ABG7	Rod shape-determining protein RodA	mrdB	0.6132	38.0114								4	3	4		4	3	4	0	14.6	40.476	272360000	160660000	111700000	95252000	68111000	27141000	137540000	106920000	30615000	0	0	0
sp|P0ABH0|FTSA_ECOLI Cell division protein FtsA OS=Escherichia coli (strain K12) OX=83333 GN=ftsA PE=1 SV=1	P0ABH0	Cell division protein FtsA	ftsA	0.52595	34.4671	0.54261	35.1748	0.54468	35.2617	2.5064	71.4807		16	13	13	6	16	13	13	6	62.4	45.329	8306000000	5172300000	3133700000	6891800000	4362000000	2529800000	6903200000	4433000000	2470200000	966620000	209940000	756680000
sp|P0ABH7|CISY_ECOLI Citrate synthase OS=Escherichia coli (strain K12) OX=83333 GN=gltA PE=1 SV=1	P0ABH7	Citrate synthase	gltA	0.30565	23.4098	0.33407	25.0414	0.35147	26.0065	2.4182	70.7448		19	19	18	20	19	19	18	20	57.8	48.014	7873300000	6107800000	1765500000	7879300000	6118900000	1760500000	7110000000	5775700000	1334300000	7058800000	1989300000	5069500000
sp|P0ABH9|CLPA_ECOLI ATP-dependent Clp protease ATP-binding subunit ClpA OS=Escherichia coli (strain K12) OX=83333 GN=clpA PE=1 SV=1	P0ABH9	ATP-dependent Clp protease ATP-binding subunit ClpA	clpA	1.6797	62.6824	1.4881	59.8087	1.3538	57.5155	4.1783	80.6886		30	22	23	20	30	22	23	20	44.7	84.206	4767700000	1946300000	2821500000	3666500000	1426800000	2239700000	3212500000	1320300000	1892200000	2901300000	476190000	2425100000
sp|P0ABI4|CORA_ECOLI Magnesium transport protein CorA OS=Escherichia coli (strain K12) OX=83333 GN=corA PE=1 SV=1	P0ABI4	Magnesium transport protein CorA	corA	0.63596	38.8738	0.66705	40.0138						7	7	7	2	7	7	7	2	35.8	36.589	477910000	299100000	178810000	285400000	222010000	63384000	242140000	213920000	28214000	11762000	0	11762000
sp|P0ABI8|CYOB_ECOLI Cytochrome bo(3) ubiquinol oxidase subunit 1 OS=Escherichia coli (strain K12) OX=83333 GN=cyoB PE=1 SV=1	P0ABI8	Cytochrome bo(3) ubiquinol oxidase subunit 1	cyoB	0.32764	24.6784	0.42135	29.6444	0.44133	30.6196	2.2383	69.1196		8	6	7	3	8	6	7	3	14.5	74.367	11004000000	8002500000	3001500000	10102000000	6993200000	3109200000	9888300000	6914900000	2973400000	1543700000	480980000	1062700000
sp|P0ABJ1|CYOA_ECOLI Cytochrome bo(3) ubiquinol oxidase subunit 2 OS=Escherichia coli (strain K12) OX=83333 GN=cyoA PE=1 SV=1	P0ABJ1	Cytochrome bo(3) ubiquinol oxidase subunit 2	cyoA	0.36873	26.9396	0.43444	30.2864	0.42909	30.0254	2.1818	68.5712		8	8	8	6	8	8	8	6	41.6	34.911	20791000000	14782000000	6008900000	22336000000	14964000000	7372800000	26408000000	17760000000	8648100000	6325900000	1396000000	4929900000
sp|P0ABJ9|CYDA_ECOLI Cytochrome bd-I ubiquinol oxidase subunit 1 OS=Escherichia coli (strain K12) OX=83333 GN=cydA PE=1 SV=1	P0ABJ9	Cytochrome bd-I ubiquinol oxidase subunit 1	cydA	0.51092	33.8152	0.53188	34.7207	0.55143	35.5433	2.6316	72.4639		13	11	15	9	13	11	15	9	28.5	58.204	8956700000	5754500000	3202200000	8146300000	5135500000	3010800000	9220200000	5793000000	3427100000	1024300000	239940000	784320000
sp|P0ABK2|CYDB_ECOLI Cytochrome bd-I ubiquinol oxidase subunit 2 OS=Escherichia coli (strain K12) OX=83333 GN=cydB PE=1 SV=1	P0ABK2	Cytochrome bd-I ubiquinol oxidase subunit 2	cydB	0.55176	35.557	0.57794	36.6262	0.62674	38.5274				3	2	2		3	2	2	1	8.4	42.453	2426700000	1553200000	873510000	2786900000	1749000000	1037800000	2327200000	1396200000	931030000	399730000	112630000	287100000
sp|P0ABK5|CYSK_ECOLI Cysteine synthase A OS=Escherichia coli (strain K12) OX=83333 GN=cysK PE=1 SV=2	P0ABK5	Cysteine synthase A	cysK	0.69012	40.8326	0.70724	41.4259	0.7244	42.0088	2.6068	72.2746		19	20	20	21	19	20	20	21	86.1	34.489	33784000000	19930000000	13854000000	39699000000	23774000000	15925000000	47119000000	27324000000	19795000000	62380000000	14193000000	48187000000
sp|P0ABN5|DCUA_ECOLI Anaerobic C4-dicarboxylate transporter DcuA OS=Escherichia coli (strain K12) OX=83333 GN=dcuA PE=1 SV=1	P0ABN5	Anaerobic C4-dicarboxylate transporter DcuA	dcuA					0.44841	30.9588						2		1	1	2	1	5.1	45.75	1334900000	937430000	397490000	1712300000	1182700000	529590000	1499600000	1004800000	494850000	359160000	115210000	243950000
sp|P0ABP8|DEOD_ECOLI Purine nucleoside phosphorylase DeoD-type OS=Escherichia coli (strain K12) OX=83333 GN=deoD PE=1 SV=2;sp|C4ZT66|DEOD_ECOBW Purine nucleoside phosphorylase DeoD-type OS=Escherichia coli (strain K12 / MC4100 / BW2952) OX=595496 GN=deoD P	P0ABP8	Purine nucleoside phosphorylase DeoD-type	deoD	0.58554	36.93	0.58998	37.1061	0.60556	37.7164	3.207	76.2301		13	15	15	17	13	15	15	17	85.8	25.95	3398900000	2226200000	1172700000	4856300000	3184400000	1671900000	4873300000	3051500000	1821800000	9319800000	2187800000	7132000000
sp|P0ABQ0|COABC_ECOLI Coenzyme A biosynthesis bifunctional protein CoaBC OS=Escherichia coli (strain K12) OX=83333 GN=coaBC PE=1 SV=2	P0ABQ0	Coenzyme A biosynthesis bifunctional protein CoaBC;Phosphopantothenoylcysteine decarboxylase;Phosphopantothenate--cysteine ligase	coaBC	0.45042	31.0545	0.50996	33.7731	0.51583	34.0295	2.484	71.2974		6	4	5	5	6	4	5	5	22.2	43.438	896760000	602020000	294740000	562790000	373410000	189380000	1157100000	762980000	394160000	432950000	126550000	306390000
sp|P0ABQ2|GARR_ECOLI 2-hydroxy-3-oxopropionate reductase OS=Escherichia coli (strain K12) OX=83333 GN=garR PE=1 SV=1	P0ABQ2	2-hydroxy-3-oxopropionate reductase	garR							2.9392	74.6141		2	2	3	4	2	2	3	4	34	30.427	16116000	0	16116000	165660000	103630000	62025000	183740000	112100000	71634000	409470000	93298000	316170000
sp|P0ABQ4|DYR_ECOLI Dihydrofolate reductase OS=Escherichia coli (strain K12) OX=83333 GN=folA PE=1 SV=1	P0ABQ4	Dihydrofolate reductase	folA													2	0	0	1	2	23.9	17.999	0	0	0	0	0	0	94422000	71124000	23298000	241030000	15969000	225070000
sp|P0ABS1|DKSA_ECOLI RNA polymerase-binding transcription factor DksA OS=Escherichia coli (strain K12) OX=83333 GN=dksA PE=1 SV=1	P0ABS1	RNA polymerase-binding transcription factor DksA	dksA										2	2	3	4	2	2	3	4	45.7	17.528	327110000	148340000	178770000	327500000	180140000	147360000	504670000	243970000	260690000	171040000	51261000	119780000
sp|P0ABS5|DNAG_ECOLI DNA primase OS=Escherichia coli (strain K12) OX=83333 GN=dnaG PE=1 SV=1	P0ABS5	DNA primase	dnaG										7	3	2	2	7	3	2	2	20.8	65.564	74369000	74369000	0	34703000	34703000	0	0	0	0	48008000	0	48008000
sp|P0ABS8|HOLE_ECOLI DNA polymerase III subunit theta OS=Escherichia coli (strain K12) OX=83333 GN=holE PE=1 SV=1	P0ABS8	DNA polymerase III subunit theta	holE							4.8501	82.9063					2	0	0	0	2	35.5	8.8462	0	0	0	0	0	0	0	0	0	165610000	28001000	137610000
sp|P0ABT2|DPS_ECOLI DNA protection during starvation protein OS=Escherichia coli (strain K12) OX=83333 GN=dps PE=1 SV=2;sp|C4ZXY4|DPS_ECOBW DNA protection during starvation protein OS=Escherichia coli (strain K12 / MC4100 / BW2952) OX=595496 GN=dps PE=3 SV	P0ABT2	DNA protection during starvation protein	dps	2.2756	69.4712	2.1019	67.7617	1.9915	66.572	4.2168	80.8312		19	19	19	17	19	19	19	17	91.6	18.695	54686000000	14766000000	39920000000	47697000000	13905000000	33792000000	44545000000	12980000000	31566000000	14575000000	2933700000	11641000000
sp|P0ABT5|DUSB_ECOLI tRNA-dihydrouridine synthase B OS=Escherichia coli (strain K12) OX=83333 GN=dusB PE=3 SV=1	P0ABT5	tRNA-dihydrouridine synthase B	dusB										2				2	1	0	0	14	35.866	46736000	17958000	28778000	42204000	22451000	19753000	0	0	0	0	0	0
sp|P0ABU0|MENB_ECOLI 1,4-dihydroxy-2-naphthoyl-CoA synthase OS=Escherichia coli (strain K12) OX=83333 GN=menB PE=1 SV=1	P0ABU0	1,4-dihydroxy-2-naphthoyl-CoA synthase	menB	0.58921	37.0757	0.59591	37.3398	0.60861	37.8345	2.8587	74.0845		7	7	7	6	7	7	7	6	30.5	31.633	2692400000	1646500000	1045900000	2186900000	1284300000	902610000	1343300000	812200000	531070000	1097000000	295240000	801800000
sp|P0ABU2|YCHF_ECOLI Ribosome-binding ATPase YchF OS=Escherichia coli (strain K12) OX=83333 GN=ychF PE=1 SV=2	P0ABU2	Ribosome-binding ATPase YchF	ychF	0.44049	30.5792	0.48998	32.885	0.50645	33.6188	2.1168	67.9158		16	11	11	9	16	11	11	9	58.4	39.667	4747200000	3241300000	1505900000	2597500000	1713800000	883710000	2964000000	1982200000	981800000	2739400000	858410000	1881000000
sp|P0ABU5|ELBB_ECOLI Glyoxalase ElbB OS=Escherichia coli (strain K12) OX=83333 GN=elbB PE=1 SV=1	P0ABU5	Enhancing lycopene biosynthesis protein 2	elbB			0.44557	30.8231	0.96354	49.0716	2.8811	74.2341		2	6	6	10	2	6	6	10	65	22.981	372060000	272360000	99698000	680000000	476430000	203570000	751440000	543660000	207780000	3135400000	845700000	2289700000
sp|P0ABU7|EXBB_ECOLI Biopolymer transport protein ExbB OS=Escherichia coli (strain K12) OX=83333 GN=exbB PE=1 SV=1	P0ABU7	Biopolymer transport protein ExbB	exbB	0.14983	13.0306	0.22849	18.5993	0.23874	19.2728	4.0836	80.3289		7	8	10	7	7	8	10	7	42.2	26.287	2106500000	1860600000	245900000	1997400000	1636000000	361390000	2337900000	1932800000	405040000	2440900000	437990000	2002900000
sp|P0ABU9|TOLQ_ECOLI Tol-Pal system protein TolQ OS=Escherichia coli (strain K12) OX=83333 GN=tolQ PE=1 SV=1	P0ABU9	Protein TolQ	tolQ	0.93791	48.398	0.42423	29.7866	0.45796	31.411	2.3123	69.8095		4	4	6	3	4	4	6	3	20.4	25.597	676170000	489940000	186230000	706870000	480960000	225910000	784530000	539000000	245530000	155530000	45025000	110500000
sp|P0ABV2|EXBD_ECOLI Biopolymer transport protein ExbD OS=Escherichia coli (strain K12) OX=83333 GN=exbD PE=1 SV=1	P0ABV2	Biopolymer transport protein ExbD	exbD	0.096645	8.81279	0.15323	13.287	0.13901	12.2045	4.0289	80.1149		8	8	8	7	8	8	8	7	45.4	15.527	3367900000	3129400000	238500000	3700800000	3235500000	465310000	2677800000	2305500000	372230000	2412100000	476080000	1936100000
sp|P0ABV6|TOLR_ECOLI Tol-Pal system protein TolR OS=Escherichia coli (strain K12) OX=83333 GN=tolR PE=1 SV=1	P0ABV6	Protein TolR	tolR	0.43266	30.1998	0.43974	30.543	0.5234	34.3574	2.7146	73.0792		4	5	5	3	4	5	5	3	39.4	15.383	352570000	287650000	64923000	717090000	485190000	231900000	678300000	443930000	234370000	169540000	52665000	116880000
sp|P0ABY7|FLHC_ECOLI Flagellar transcriptional regulator FlhC OS=Escherichia coli (strain K12) OX=83333 GN=flhC PE=1 SV=1	P0ABY7	Flagellar transcriptional regulator FlhC	flhC										2				2	1	1	0	5.2	21.566	2037800000	1367400000	670360000	2313000000	1505000000	808030000	3135000000	2058900000	1076100000	0	0	0
sp|P0ABZ6|SURA_ECOLI Chaperone SurA OS=Escherichia coli (strain K12) OX=83333 GN=surA PE=1 SV=1	P0ABZ6	Chaperone SurA	surA	0.34889	25.865	0.38911	28.0115	0.40335	28.7419	2.6318	72.4654		19	19	19	23	19	19	19	23	57.9	47.283	4072500000	3216300000	856230000	5562900000	3873700000	1689300000	5268600000	3701000000	1567700000	3889700000	857240000	3032500000
sp|P0AC02|BAMD_ECOLI Outer membrane protein assembly factor BamD OS=Escherichia coli (strain K12) OX=83333 GN=bamD PE=1 SV=1	P0AC02	Outer membrane protein assembly factor BamD	bamD	0.24528	19.6968	0.26945	21.2257	0.28524	22.1935	2.5308	71.6778		10	15	14	9	10	15	14	9	60.4	27.829	1433200000	1127100000	306140000	3255100000	2813400000	441700000	2937100000	1927100000	1010000000	2012600000	543600000	1469000000
sp|P0AC13|DHPS_ECOLI Dihydropteroate synthase OS=Escherichia coli (strain K12) OX=83333 GN=folP PE=1 SV=1	P0AC13	Dihydropteroate synthase	folP	0.43077	30.1076	0.56264	36.0057	0.48861	32.8232	2.1459	68.2126		5	6	6	6	5	6	6	6	43.6	30.615	479660000	340700000	138960000	311970000	220500000	91470000	478620000	305510000	173110000	326580000	78908000	247670000
sp|P0AC19|FOLX_ECOLI Dihydroneopterin triphosphate 2-epimerase OS=Escherichia coli (strain K12) OX=83333 GN=folX PE=1 SV=2	P0AC19	D-erythro-7,8-dihydroneopterin triphosphate epimerase	folX			0.44286	30.6932			2.1027	67.77		2	2	2	5	2	2	2	5	39.2	14.082	64325000	41235000	23090000	311550000	224540000	87004000	61762000	33131000	28631000	225870000	58685000	167190000
sp|P0AC30|FTSX_ECOLI Cell division protein FtsX OS=Escherichia coli (strain K12) OX=83333 GN=ftsX PE=1 SV=1	P0AC30	Cell division protein FtsX	ftsX	0.46685	31.8267	0.48891	32.8368	0.54585	35.3107	2.6591	72.6709		5	5	5	3	5	5	5	3	23.6	38.543	330110000	222450000	107660000	597890000	385820000	212070000	586560000	381630000	204920000	282810000	70613000	212200000
sp|P0AC33|FUMA_ECOLI Fumarate hydratase class I, aerobic OS=Escherichia coli (strain K12) OX=83333 GN=fumA PE=1 SV=2	P0AC33	Fumarate hydratase class I, aerobic	fumA	0.51582	34.0291	0.54879	35.4335	0.58774	37.0174	1.1596	53.6951		24	19	22	17	24	19	22	17	77.6	60.298	3522800000	2361100000	1161600000	1290100000	825650000	464470000	3287400000	1906500000	1380800000	786670000	330630000	456040000
sp|P0AC41|SDHA_ECOLI Succinate dehydrogenase flavoprotein subunit OS=Escherichia coli (strain K12) OX=83333 GN=sdhA PE=1 SV=1	P0AC41	Succinate dehydrogenase flavoprotein subunit	sdhA	0.2736	21.4824	0.30018	23.0876	0.31923	24.1982	0.90611	47.5371		32	30	31	14	32	30	31	14	67.5	64.421	15121000000	12121000000	3000100000	13327000000	10130000000	3197300000	13814000000	10464000000	3350100000	1096000000	699270000	396710000
sp|P0AC47|FRDB_ECOLI Fumarate reductase iron-sulfur subunit OS=Escherichia coli (strain K12) OX=83333 GN=frdB PE=1 SV=2	P0AC47	Fumarate reductase iron-sulfur subunit	frdB					0.6223	38.3591					4	5	2	1	4	5	2	20.1	27.123	103650000	0	103650000	407750000	91906000	315840000	476750000	125640000	351110000	119020000	29481000	89535000
sp|P0AC53|G6PD_ECOLI Glucose-6-phosphate 1-dehydrogenase OS=Escherichia coli (strain K12) OX=83333 GN=zwf PE=1 SV=1	P0AC53	Glucose-6-phosphate 1-dehydrogenase;Extracellular death factor	zwf	0.47197	32.0638	0.47183	32.0574	0.49883	33.2813	2.8705	74.1635		21	22	23	26	21	22	23	26	67	55.704	4740300000	3291800000	1448500000	5125700000	3520100000	1605600000	4859100000	3423900000	1435200000	5560400000	1291400000	4269000000
sp|P0AC55|GLNK_ECOLI Nitrogen regulatory protein P-II 2 OS=Escherichia coli (strain K12) OX=83333 GN=glnK PE=1 SV=1	P0AC55	Nitrogen regulatory protein P-II 2	glnK	0.78815	44.0763			1.0119	50.2957				3	2	3	2	3	2	3	2	32.1	12.259	535470000	292410000	243060000	63883000	25948000	37935000	189410000	99634000	89776000	17965000	5869500	12096000
sp|P0AC59|GLRX2_ECOLI Glutaredoxin 2 OS=Escherichia coli (strain K12) OX=83333 GN=grxB PE=1 SV=1	P0AC59	Glutaredoxin-2	grxB	0.36445	26.7104	0.3947	28.3	0.38717	27.9108	3.4284	77.4185		12	11	9	18	12	11	9	18	93.5	24.35	1720700000	1157500000	563190000	2024500000	1421400000	603020000	1519100000	1012200000	506880000	13812000000	2958300000	10854000000
sp|P0AC62|GLRX3_ECOLI Glutaredoxin 3 OS=Escherichia coli (strain K12) OX=83333 GN=grxC PE=1 SV=2	P0AC62	Glutaredoxin-3	grxC	0.36983	26.9982	0.43483	30.3053	0.41912	29.5338				2	4	3	3	2	4	3	3	75.9	9.1374	652310000	459350000	192960000	692970000	483610000	209360000	618010000	430240000	187770000	263820000	71587000	192230000
sp|P0AC69|GLRX4_ECOLI Glutaredoxin 4 OS=Escherichia coli (strain K12) OX=83333 GN=grxD PE=1 SV=1	P0AC69	Glutaredoxin-4	grxD	0.59361	37.2494	0.62741	38.5527	0.69492	41.0002	2.007	66.7443		5	5	6	6	5	5	6	6	53	12.879	961460000	664190000	297270000	1405900000	941420000	464470000	1976100000	1101400000	874650000	2602700000	831380000	1771300000
sp|P0AC75|KDTA_ECOLI 3-deoxy-D-manno-octulosonic acid transferase OS=Escherichia coli (strain K12) OX=83333 GN=waaA PE=1 SV=1	P0AC75	3-deoxy-D-manno-octulosonic acid transferase	waaA										3	4	3	2	3	4	3	2	13.4	47.29	34997000	34997000	0	90852000	46802000	44050000	54289000	0	54289000	14838000	0	14838000
sp|P0AC81|LGUL_ECOLI Lactoylglutathione lyase OS=Escherichia coli (strain K12) OX=83333 GN=gloA PE=1 SV=1	P0AC81	Lactoylglutathione lyase	gloA							2.7413	73.2713					3	0	1	1	3	26.7	14.92	0	0	0	36842000	24685000	12157000	38750000	27092000	11658000	412550000	151540000	261010000
sp|P0AC84|GLO2_ECOLI Hydroxyacylglutathione hydrolase GloB OS=Escherichia coli (strain K12) OX=83333 GN=gloB PE=1 SV=1;sp|C4ZRU9|GLO2_ECOBW Hydroxyacylglutathione hydrolase OS=Escherichia coli (strain K12 / MC4100 / BW2952) OX=595496 GN=gloB PE=3 SV=1;sp|B	P0AC84	Hydroxyacylglutathione hydrolase	gloB			0.45496	31.2696			2.9193	74.4852			2	2	4	1	2	2	4	22.7	28.434	30860000	30860000	0	139890000	85274000	54619000	85351000	63557000	21795000	324530000	70109000	254420000
sp|P0AC86|PHSG_ECOLI Glycogen phosphorylase OS=Escherichia coli (strain K12) OX=83333 GN=glgP PE=3 SV=1	P0AC86	Glycogen phosphorylase	glgP	0.61308	38.0068	0.48757	32.7763	0.49026	32.8976	3.7543	78.9664		11	14	15	15	11	14	15	15	30.3	93.171	1567200000	909910000	657250000	1255200000	843380000	411870000	1180500000	790590000	389920000	857320000	126570000	730750000
sp|P0AC88|GM4D_ECOLI GDP-mannose 4,6-dehydratase OS=Escherichia coli (strain K12) OX=83333 GN=gmd PE=1 SV=1	P0AC88	GDP-mannose 4,6-dehydratase	gmd	1.7134	63.1459	1.7614	63.7865	1.7346	63.4316				8	8	11		8	8	11	0	45	42.046	1234800000	465630000	769150000	1243200000	441370000	801810000	1916500000	610880000	1305600000	0	0	0
sp|P0AC92|GNSA_ECOLI Protein GnsA OS=Escherichia coli (strain K12) OX=83333 GN=gnsA PE=1 SV=1	P0AC92	Protein GnsA	gnsA							2.6014	72.233		2	2	2	3	1	1	1	2	54.4	6.5755	46231000	46231000	0	43561000	43561000	0	43428000	43428000	0	247740000	74071000	173660000
sp|P0ACA1|YIBF_ECOLI Uncharacterized GST-like protein YibF OS=Escherichia coli (strain K12) OX=83333 GN=yibF PE=1 SV=1	P0ACA1	Uncharacterized GST-like protein YibF	yibF	0.47523	32.214	0.46274	31.6352	0.43779	30.4488	2.9973	74.9831		9	4	5	9	9	4	5	9	53	22.545	492140000	338410000	153740000	403130000	301380000	101750000	345500000	231900000	113590000	882170000	218130000	664030000
sp|P0ACA3|SSPA_ECOLI Stringent starvation protein A OS=Escherichia coli (strain K12) OX=83333 GN=sspA PE=1 SV=2	P0ACA3	Stringent starvation protein A	sspA	0.46397	31.6926	0.52768	34.5413	0.50944	33.7503	2.5781	72.0522		8	10	10	10	8	10	10	10	78.3	24.305	1360000000	1004600000	355450000	1841600000	1245100000	596420000	1432000000	1037400000	394620000	3651800000	987710000	2664100000
sp|P0ACA7|GSTB_ECOLI Glutathione S-transferase GstB OS=Escherichia coli (strain K12) OX=83333 GN=gstB PE=1 SV=1	P0ACA7	Glutathione S-transferase GstB	gstB	0.36801	26.9011			0.40363	28.7562	3.1353	75.818		6	3	5	7	6	3	5	7	43.8	23.713	417740000	363280000	54454000	232010000	185540000	46467000	403730000	290610000	113120000	1250700000	296860000	953840000
sp|P0ACB0|DNAB_ECOLI Replicative DNA helicase OS=Escherichia coli (strain K12) OX=83333 GN=dnaB PE=1 SV=1	P0ACB0	Replicative DNA helicase	dnaB	0.42098	29.626	0.44937	31.0045	0.51886	34.1611	2.2478	69.2099		11	8	9	6	11	8	9	6	33.8	52.389	381830000	286310000	95515000	344680000	246160000	98519000	467920000	316750000	151170000	141580000	45438000	96144000
sp|P0ACB2|HEM2_ECOLI Delta-aminolevulinic acid dehydratase OS=Escherichia coli (strain K12) OX=83333 GN=hemB PE=1 SV=2	P0ACB2	Delta-aminolevulinic acid dehydratase	hemB	0.37939	27.5042	0.47279	32.1017	0.42608	29.8777	2.6469	72.5795		9	11	12	13	9	11	12	13	56.8	35.624	937380000	641600000	295780000	750910000	463580000	287340000	985850000	631270000	354570000	1510000000	389490000	1120500000
sp|P0ACB4|HEMG_ECOLI Protoporphyrinogen IX dehydrogenase [menaquinone] OS=Escherichia coli (strain K12) OX=83333 GN=hemG PE=1 SV=1	P0ACB4	Protoporphyrinogen IX dehydrogenase [menaquinone]	hemG	0.41467	29.3121	0.46062	31.5359	0.44071	30.5898				6	7	8	4	6	7	8	4	52.5	21.226	242240000	195450000	46792000	601460000	449350000	152110000	418020000	359440000	58573000	161930000	20381000	141550000
sp|P0ACB7|HEMY_ECOLI Protein HemY OS=Escherichia coli (strain K12) OX=83333 GN=hemY PE=1 SV=1	P0ACB7	Protein HemY	hemY	0.43519	30.3228	0.44597	30.8423	0.43351	30.2412	2.4523	71.0338		12	14	14	9	12	14	14	9	51.8	45.244	1999800000	1385000000	614790000	1922800000	1586500000	336350000	2494100000	1689400000	804730000	1233900000	374320000	859550000
sp|P0ACC3|ERPA_ECOLI Iron-sulfur cluster insertion protein ErpA OS=Escherichia coli (strain K12) OX=83333 GN=erpA PE=1 SV=1;sp|C4ZRP9|ERPA_ECOBW Iron-sulfur cluster insertion protein ErpA OS=Escherichia coli (strain K12 / MC4100 / BW2952) OX=595496 GN=erpA	P0ACC3	Iron-sulfur cluster insertion protein ErpA	erpA	0.7348	42.3565	0.77248	43.5819	0.76436	43.3222				2	2	2	3	2	2	2	3	33.3	12.1	828520000	481070000	347450000	889120000	500310000	388810000	816580000	445050000	371530000	566110000	141160000	424950000
sp|P0ACC7|GLMU_ECOLI Bifunctional protein GlmU OS=Escherichia coli (strain K12) OX=83333 GN=glmU PE=1 SV=1;sp|C4ZZ08|GLMU_ECOBW Bifunctional protein GlmU OS=Escherichia coli (strain K12 / MC4100 / BW2952) OX=595496 GN=glmU PE=3 SV=1;sp|B1X9V8|GLMU_ECODH Bi	P0ACC7	Bifunctional protein GlmU;UDP-N-acetylglucosamine pyrophosphorylase;Glucosamine-1-phosphate N-acetyltransferase	glmU	0.33904	25.3196	0.4043	28.7901	0.38705	27.9045	2.2905	69.6095		6	6	8	10	6	6	8	10	43.6	49.19	1011400000	763360000	248050000	611780000	438810000	172970000	920510000	648950000	271560000	1058800000	304000000	754780000
sp|P0ACD4|ISCU_ECOLI Iron-sulfur cluster assembly scaffold protein IscU OS=Escherichia coli (strain K12) OX=83333 GN=iscU PE=1 SV=1	P0ACD4	Iron-sulfur cluster assembly scaffold protein IscU	iscU	0.70847	41.4681	0.7611	43.2173	0.7368	42.4228	3.7332	78.8726		3	4	5	7	3	4	5	7	73.4	13.848	548620000	334450000	214160000	755060000	324380000	430680000	815160000	508890000	306270000	1577200000	206490000	1370700000
sp|P0ACE7|HINT_ECOLI Purine nucleoside phosphoramidase OS=Escherichia coli (strain K12) OX=83333 GN=hinT PE=1 SV=1	P0ACE7	HIT-like protein HinT	hinT										3	2	2	4	3	2	2	4	37.8	13.241	0	0	0	0	0	0	0	0	0	105720000	0	105720000
sp|P0ACF0|DBHA_ECOLI DNA-binding protein HU-alpha OS=Escherichia coli (strain K12) OX=83333 GN=hupA PE=1 SV=1	P0ACF0	DNA-binding protein HU-alpha	hupA	0.54392	35.2298	0.55586	35.7269	0.57216	36.3932	2.6097	72.2969		5	4	4	4	5	4	4	4	62.2	9.5349	18648000000	11564000000	7084600000	21650000000	12514000000	9135900000	23775000000	14794000000	8981800000	35325000000	9138100000	26187000000
sp|P0ACF4|DBHB_ECOLI DNA-binding protein HU-beta OS=Escherichia coli (strain K12) OX=83333 GN=hupB PE=1 SV=1	P0ACF4	DNA-binding protein HU-beta	hupB	0.33147	24.895	0.36148	26.5505	0.38419	27.7556	2.697	72.951		3	3	3	4	3	3	3	4	52.2	9.2255	4859800000	3601900000	1257900000	5536600000	4010700000	1525900000	5920500000	4279500000	1641000000	18250000000	4986300000	13263000000
sp|P0ACF8|HNS_ECOLI DNA-binding protein H-NS OS=Escherichia coli (strain K12) OX=83333 GN=hns PE=1 SV=2	P0ACF8	DNA-binding protein H-NS	hns	0.54626	35.3278	0.55046	35.503	0.55074	35.5147	2.7087	73.0364		10	11	11	14	10	11	11	14	74.5	15.539	11522000000	7138000000	4383800000	9945900000	6401700000	3544200000	8278500000	5353000000	2925600000	28794000000	6531300000	22263000000
sp|P0ACG1|STPA_ECOLI DNA-binding protein StpA OS=Escherichia coli (strain K12) OX=83333 GN=stpA PE=1 SV=1	P0ACG1	DNA-binding protein StpA	stpA	0.38739	27.9222	0.34429	25.6113	0.36479	26.7287	2.3198	69.8777		6	7	6	10	6	7	6	10	67.9	15.347	1045200000	824400000	220800000	1324400000	995330000	329100000	1443100000	1105200000	337960000	3755100000	900780000	2854300000
sp|P0ACI0|ROB_ECOLI Right origin-binding protein OS=Escherichia coli (strain K12) OX=83333 GN=rob PE=1 SV=1	P0ACI0	Right origin-binding protein	rob	0.47137	32.0361	0.44326	30.7124	0.43326	30.229	2.7136	73.072		8	7	6	7	8	7	6	7	23.2	33.144	892860000	592470000	300390000	431800000	349970000	81836000	473830000	386160000	87672000	487980000	131260000	356720000
sp|P0ACJ0|LRP_ECOLI Leucine-responsive regulatory protein OS=Escherichia coli (strain K12) OX=83333 GN=lrp PE=1 SV=2	P0ACJ0	Leucine-responsive regulatory protein	lrp	0.35495	26.1965	0.42353	29.7521	0.39784	28.4611	2.5721	72.0053		9	10	12	13	9	10	12	13	72	18.887	7480900000	5415500000	2065300000	3848400000	2609600000	1238700000	6031500000	4283600000	1747900000	7444600000	2002200000	5442400000
sp|P0ACJ8|CRP_ECOLI cAMP-activated global transcriptional regulator CRP OS=Escherichia coli (strain K12) OX=83333 GN=crp PE=1 SV=1	P0ACJ8	cAMP-activated global transcriptional regulator CRP	crp	0.40546	28.8489	0.43143	30.1398	0.42284	29.718	2.7906	73.619		17	16	16	18	17	16	16	18	81	23.64	11856000000	8411400000	3444400000	7311400000	5061400000	2250000000	9128300000	6319000000	2809300000	4473500000	1204600000	3268900000
sp|P0ACK5|DEOR_ECOLI Deoxyribose operon repressor OS=Escherichia coli (strain K12) OX=83333 GN=deoR PE=1 SV=1	P0ACK5	Deoxyribose operon repressor	deoR										2				2	1	0	1	9.1	28.548	114140000	114140000	0	98008000	98008000	0	0	0	0	0	0	0
sp|P0ACL0|GLPR_ECOLI Glycerol-3-phosphate regulon repressor OS=Escherichia coli (strain K12) OX=83333 GN=glpR PE=1 SV=1	P0ACL0	Glycerol-3-phosphate regulon repressor	glpR	0.45712	31.3715	0.51646	34.0569	0.51834	34.1386	1.8428	64.8234		5	4	4	5	5	4	4	5	36.1	28.048	465000000	305850000	159150000	361170000	236220000	124950000	472930000	299490000	173440000	208040000	64716000	143320000
sp|P0ACL2|EXUR_ECOLI Exu regulon transcriptional regulator OS=Escherichia coli (strain K12) OX=83333 GN=exuR PE=4 SV=1	P0ACL2	Exu regulon transcriptional regulator	exuR	0.48653	32.7292								3	2	2	3	3	2	2	3	31	29.835	155560000	101810000	53744000	38692000	38692000	0	63038000	63038000	0	42375000	7491900	34883000
sp|P0ACM2|RSPR_ECOLI HTH-type transcriptional repressor RspR OS=Escherichia coli (strain K12) OX=83333 GN=rspR PE=1 SV=1	P0ACM2	HTH-type transcriptional repressor RspR	rspR										5	5	4		5	5	4	1	38.6	26.565	0	0	0	10225000	10225000	0	0	0	0	0	0	0
sp|P0ACM5|YEGW_ECOLI Uncharacterized HTH-type transcriptional regulator YegW OS=Escherichia coli (strain K12) OX=83333 GN=yegW PE=4 SV=1	P0ACM5	Uncharacterized HTH-type transcriptional regulator YegW	yegW										3		2		3	1	2	1	28.6	28.277	68000000	54901000	13099000	36625000	24084000	12541000	0	0	0	0	0	0
sp|P0ACN4|ALLR_ECOLI HTH-type transcriptional repressor AllR OS=Escherichia coli (strain K12) OX=83333 GN=allR PE=1 SV=1	P0ACN4	HTH-type transcriptional repressor AllR	allR							2.4364	70.8998		4	3	4	4	4	3	4	4	30.6	29.269	211450000	174410000	37039000	156620000	156620000	0	240810000	218780000	22035000	152460000	67195000	85266000
sp|P0ACP1|CRA_ECOLI Catabolite repressor/activator OS=Escherichia coli (strain K12) OX=83333 GN=cra PE=1 SV=1	P0ACP1	Catabolite repressor/activator	cra										7	2			7	2	1	0	29	37.999	51254000	33204000	18051000	0	0	0	0	0	0	0	0	0
sp|P0ACP5|GNTR_ECOLI HTH-type transcriptional regulator GntR OS=Escherichia coli (strain K12) OX=83333 GN=gntR PE=1 SV=1	P0ACP5	HTH-type transcriptional regulator GntR	gntR										2		2	2	2	1	2	2	16.3	36.422	26208000	18160000	8048700	22827000	15814000	7013500	36559000	24709000	11850000	0	0	0
sp|P0ACP7|PURR_ECOLI HTH-type transcriptional repressor PurR OS=Escherichia coli (strain K12) OX=83333 GN=purR PE=1 SV=2;sp|C4ZYC2|PURR_ECOBW HTH-type transcriptional repressor PurR OS=Escherichia coli (strain K12 / MC4100 / BW2952) OX=595496 GN=purR PE=3	P0ACP7	HTH-type transcriptional repressor PurR	purR	0.3653	26.756	0.38426	27.7592	0.42151	29.6523	2.6184	72.3635		8	8	11	12	8	8	11	12	47.8	38.174	2674800000	1968600000	706180000	1857500000	1344600000	512900000	1355600000	980170000	375450000	1949200000	535840000	1413400000
sp|P0ACQ4|OXYR_ECOLI Hydrogen peroxide-inducible genes activator OS=Escherichia coli (strain K12) OX=83333 GN=oxyR PE=1 SV=1	P0ACQ4	Hydrogen peroxide-inducible genes activator	oxyR										7	6	7	6	7	6	7	6	32.5	34.276	67928000	67928000	0	37410000	37410000	0	123770000	101000000	22771000	14185000	0	14185000
sp|P0ACR4|YEIE_ECOLI Uncharacterized HTH-type transcriptional regulator YeiE OS=Escherichia coli (strain K12) OX=83333 GN=yeiE PE=4 SV=1	P0ACR4	Uncharacterized HTH-type transcriptional regulator YeiE	yeiE										3	2		3	3	2	0	3	15.4	32.723	0	0	0	0	0	0	0	0	0	0	0	0
sp|P0ACR9|MPRA_ECOLI Transcriptional repressor MprA OS=Escherichia coli (strain K12) OX=83333 GN=mprA PE=2 SV=1	P0ACR9	Transcriptional repressor MprA	mprA	0.30752	23.5193	0.34955	25.9012	0.37882	27.4742	2.3614	70.2505		3	3	4	6	3	3	4	6	41.5	20.563	385090000	287930000	97159000	493700000	356680000	137030000	623460000	459800000	163650000	1436800000	433190000	1003600000
sp|P0ACS7|RPIR_ECOLI HTH-type transcriptional regulator RpiR OS=Escherichia coli (strain K12) OX=83333 GN=rpiR PE=1 SV=1	P0ACS7	HTH-type transcriptional regulator RpiR	rpiR										2	2	2	2	2	2	2	2	24	32.362	0	0	0	0	0	0	22562000	0	22562000	0	0	0
sp|P0ACU7|YJDC_ECOLI HTH-type transcriptional regulator YjdC OS=Escherichia coli (strain K12) OX=83333 GN=yjdC PE=4 SV=1	P0ACU7	HTH-type transcriptional regulator YjdC	yjdC							3.202	76.2018		2	2	2	8	2	2	2	8	45	21.931	94686000	73047000	21639000	88224000	58412000	29812000	67745000	41064000	26681000	1546600000	230350000	1316300000
sp|P0ACV0|LPXL_ECOLI Lipid A biosynthesis lauroyltransferase OS=Escherichia coli (strain K12) OX=83333 GN=lpxL PE=1 SV=1	P0ACV0	Lipid A biosynthesis lauroyltransferase	lpxL										2	3	3		2	3	3	0	16.3	35.406	0	0	0	108800000	74040000	34756000	89441000	56177000	33264000	0	0	0
sp|P0ACV4|LAPA_ECOLI Lipopolysaccharide assembly protein A OS=Escherichia coli (strain K12) OX=83333 GN=lapA PE=1 SV=1	P0ACV4	Lipopolysaccharide assembly protein A	lapA	0.45643	31.339	0.48876	32.83	0.49082	32.9228				2	2	2		2	2	2	1	22.5	11.351	420880000	295100000	125780000	891250000	572470000	318780000	1056800000	680720000	376130000	142640000	46855000	95788000
sp|P0ACX3|YDHR_ECOLI Putative monooxygenase YdhR OS=Escherichia coli (strain K12) OX=83333 GN=ydhR PE=1 SV=1	P0ACX3	Putative monooxygenase YdhR	ydhR	0.50914	33.7371	0.5455	35.296	0.5221	34.3013	3.1682	76.0088		3	5	5	5	3	5	5	5	61.4	11.288	815990000	556410000	259570000	874390000	565400000	309000000	754280000	473630000	280650000	5175600000	1164400000	4011200000
sp|P0ACY1|YDJA_ECOLI Putative NAD(P)H nitroreductase YdjA OS=Escherichia coli (strain K12) OX=83333 GN=ydjA PE=1 SV=1	P0ACY1	Putative NAD(P)H nitroreductase YdjA	ydjA	0.40153	28.6494	0.45594	31.3159	0.40593	28.8727	2.8461	73.9996		5	6	8	10	5	6	8	10	55.7	20.059	656460000	458770000	197680000	447760000	321420000	126340000	693010000	498240000	194760000	1086300000	297100000	789160000
sp|P0ACY3|YEAG_ECOLI Uncharacterized protein YeaG OS=Escherichia coli (strain K12) OX=83333 GN=yeaG PE=3 SV=1	P0ACY3	Uncharacterized protein YeaG	yeaG	0.8959	47.2546	0.81888	45.0211	0.72242	41.9422	3.8466	79.367		31	31	30	25	31	31	30	25	62.6	74.479	20827000000	10648000000	10179000000	17175000000	9220500000	7954600000	18457000000	10627000000	7829600000	9983000000	1947000000	8036100000
sp|P0ACY9|YEBG_ECOLI Uncharacterized protein YebG OS=Escherichia coli (strain K12) OX=83333 GN=yebG PE=4 SV=1	P0ACY9	Uncharacterized protein YebG	yebG										2	3	2	3	2	3	2	3	32.3	10.717	15323000	15323000	0	69762000	45471000	24291000	82320000	51176000	31143000	110620000	8362200	102260000
sp|P0ACZ4|EVGA_ECOLI DNA-binding transcriptional activator EvgA OS=Escherichia coli (strain K12) OX=83333 GN=evgA PE=1 SV=1	P0ACZ4	Positive transcription regulator EvgA	evgA	0.3094	23.6291	0.33655	25.1805	0.35322	26.1022				6	7	6	2	6	7	6	2	38.7	22.69	701920000	524260000	177650000	477080000	358050000	119030000	471930000	360840000	111100000	235300000	53278000	182020000
sp|P0AD07|YECF_ECOLI Uncharacterized protein YecF OS=Escherichia coli (strain K12) OX=83333 GN=yecF PE=4 SV=1	P0AD07	Uncharacterized protein YecF	yecF	0.39179	28.1501	0.55576	35.7227	0.45811	31.4181	2.0622	67.3437		3	2	2	3	3	2	2	3	75.7	8.2385	313800000	158300000	155490000	266880000	169480000	97406000	464350000	301510000	162850000	533540000	139130000	394410000
sp|P0AD10|YECJ_ECOLI Uncharacterized protein YecJ OS=Escherichia coli (strain K12) OX=83333 GN=yecJ PE=4 SV=1	P0AD10	Uncharacterized protein YecJ	yecJ							2.2069	68.8172		2	3	2	3	2	3	2	3	50.6	9.1225	22032000	16486000	5546700	30252000	22734000	7518200	18542000	18542000	0	77791000	28220000	49571000
sp|P0AD12|YEEZ_ECOLI Protein YeeZ OS=Escherichia coli (strain K12) OX=83333 GN=yeeZ PE=1 SV=1	P0AD12	Protein YeeZ	yeeZ										7	4	6	7	7	4	6	7	39.4	29.68	15406000	15406000	0	0	0	0	0	0	0	45904000	0	45904000
sp|P0AD24|YEJL_ECOLI UPF0352 protein YejL OS=Escherichia coli (strain K12) OX=83333 GN=yejL PE=1 SV=1;sp|C4ZU32|YEJL_ECOBW UPF0352 protein YejL OS=Escherichia coli (strain K12 / MC4100 / BW2952) OX=595496 GN=yejL PE=3 SV=1;sp|B1X885|YEJL_ECODH UPF0352 prot	P0AD24	UPF0352 protein YejL	yejL												2	3	1	1	2	3	61.3	8.2884	0	0	0	0	0	0	0	0	0	90858000	27523000	63335000
sp|P0AD27|YEJM_ECOLI Inner membrane protein YejM OS=Escherichia coli (strain K12) OX=83333 GN=yejM PE=1 SV=1	P0AD27	Inner membrane protein YejM	yejM	0.34323	25.5526			0.38902	28.0068				12	12	13	4	12	12	13	4	41	67.295	164710000	120150000	44563000	101260000	68379000	32877000	160920000	103920000	56994000	0	0	0
sp|P0AD44|YFHG_ECOLI Uncharacterized protein YfhG OS=Escherichia coli (strain K12) OX=83333 GN=yfhG PE=3 SV=1	P0AD44	Uncharacterized protein YfhG	yfhG										2		2		2	1	2	1	16.5	27.348	0	0	0	0	0	0	0	0	0	0	0	0
sp|P0AD49|YFIA_ECOLI Ribosome-associated inhibitor A OS=Escherichia coli (strain K12) OX=83333 GN=raiA PE=1 SV=2	P0AD49	Ribosome-associated inhibitor A	raiA	1.1993	54.531	1.1237	52.9124	1.1908	54.3546	4.2583	80.9824		6	5	8	4	6	5	8	4	70.8	12.784	2046800000	921900000	1124900000	2795600000	1348500000	1447100000	3064600000	1357400000	1707200000	475650000	40059000	435590000
sp|P0AD53|YGAC_ECOLI Uncharacterized protein YgaC OS=Escherichia coli (strain K12) OX=83333 GN=ygaC PE=4 SV=1	P0AD53	Uncharacterized protein YgaC	ygaC										2		3	2	2	1	3	2	26.3	13.066	59018000	18214000	40803000	38573000	20045000	18528000	57571000	21411000	36160000	20294000	0	20294000
sp|P0AD57|ISPB_ECOLI Octaprenyl diphosphate synthase OS=Escherichia coli (strain K12) OX=83333 GN=ispB PE=1 SV=1	P0AD57	Octaprenyl-diphosphate synthase	ispB												2	3	0	0	2	3	11.8	35.217	0	0	0	0	0	0	93704000	93704000	0	156950000	0	156950000
sp|P0AD59|IVY_ECOLI Inhibitor of vertebrate lysozyme OS=Escherichia coli (strain K12) OX=83333 GN=ivy PE=1 SV=1	P0AD59	Inhibitor of vertebrate lysozyme	ivy	1.6749	62.6154	1.8285	64.6456	1.7548	63.6997	3.5161	77.857		8	8	8	8	8	8	8	8	68.8	16.872	8217800000	3287600000	4930200000	9679500000	3176600000	6502900000	11809000000	4048800000	7760600000	10053000000	2180800000	7871800000
sp|P0AD61|KPYK1_ECOLI Pyruvate kinase I OS=Escherichia coli (strain K12) OX=83333 GN=pykF PE=1 SV=1	P0AD61	Pyruvate kinase I	pykF	0.52139	34.2706	0.52781	34.5468	0.52729	34.5246	2.476	71.2313		30	30	32	28	30	30	32	28	78.7	50.729	24362000000	15741000000	8620300000	26238000000	17612000000	8626400000	27308000000	17652000000	9656000000	34101000000	9111400000	24990000000
sp|P0AD65|MRDA_ECOLI Peptidoglycan D,D-transpeptidase MrdA OS=Escherichia coli (strain K12) OX=83333 GN=mrdA PE=1 SV=1	P0AD65	Penicillin-binding protein 2	mrdA	0.47419	32.1661	0.48582	32.6971	0.46479	31.7308				8	7	9	6	8	7	9	6	23.4	70.856	351540000	253780000	97763000	389940000	262010000	127930000	404230000	289160000	115080000	60539000	0	60539000
sp|P0AD68|FTSI_ECOLI Peptidoglycan D,D-transpeptidase FtsI OS=Escherichia coli (strain K12) OX=83333 GN=ftsI PE=1 SV=1	P0AD68	Peptidoglycan synthase FtsI	ftsI	0.64884	39.3513	0.69697	41.0714	0.66699	40.0116				9	11	11	3	9	11	11	3	35.5	63.877	655090000	430470000	224620000	777240000	423490000	353760000	553040000	335430000	217620000	34736000	4640300	30096000
sp|P0AD70|AMPH_ECOLI D-alanyl-D-alanine-carboxypeptidase/endopeptidase AmpH OS=Escherichia coli (strain K12) OX=83333 GN=ampH PE=1 SV=1	P0AD70	D-alanyl-D-alanine-carboxypeptidase/endopeptidase AmpH	ampH											2	2		1	2	2	0	9.9	41.849	0	0	0	100840000	88446000	12394000	160640000	138990000	21646000	0	0	0
sp|P0AD96|LIVJ_ECOLI Leu/Ile/Val-binding protein OS=Escherichia coli (strain K12) OX=83333 GN=livJ PE=1 SV=1	P0AD96	Leu/Ile/Val-binding protein	livJ	0.22796	18.5641	0.23933	19.3112	0.23172	18.8127	2.4902	71.3483		18	19	19	21	17	18	18	20	82	39.076	40508000000	33590000000	6918400000	42628000000	35420000000	7207600000	40409000000	34852000000	5557300000	40425000000	8793800000	31632000000
sp|P0ADA1|TESA_ECOLI Thioesterase 1/protease 1/lysophospholipase L1 OS=Escherichia coli (strain K12) OX=83333 GN=tesA PE=1 SV=1	P0ADA1	Acyl-CoA thioesterase I	tesA										2	3	3	6	2	3	3	6	32.7	23.622	47764000	47764000	0	39091000	39091000	0	54543000	37502000	17041000	349630000	0	349630000
sp|P0ADA3|NLPD_ECOLI Murein hydrolase activator NlpD OS=Escherichia coli (strain K12) OX=83333 GN=nlpD PE=1 SV=1	P0ADA3	Murein hydrolase activator NlpD	nlpD	0.5454	35.2918	0.55522	35.7004	0.60115	37.5449	2.5427	71.7729		6	9	11	8	6	9	11	8	53.8	40.149	1090100000	691060000	398990000	1375900000	844350000	531560000	1604600000	993720000	610910000	1396200000	371570000	1024700000
sp|P0ADA5|YAJG_ECOLI Uncharacterized lipoprotein YajG OS=Escherichia coli (strain K12) OX=83333 GN=yajG PE=3 SV=1	P0ADA5	Uncharacterized lipoprotein YajG	yajG	0.37014	27.0148	0.43657	30.3897	0.42079	29.6166	2.1984	68.7344		8	8	8	6	8	8	8	6	59.4	20.95	11541000000	8391400000	3150000000	15328000000	10361000000	4967400000	17339000000	11767000000	5571600000	5390900000	2437900000	2953000000
sp|P0ADB1|OSME_ECOLI Osmotically-inducible putative lipoprotein OsmE OS=Escherichia coli (strain K12) OX=83333 GN=osmE PE=2 SV=1	P0ADB1	Osmotically-inducible lipoprotein E	osmE	0.79456	44.276	0.7747	43.6524	0.76281	43.2724	3.0218	75.1355		6	7	6	6	6	7	6	6	71.4	12.021	25653000000	12925000000	12728000000	19197000000	11738000000	7458700000	20149000000	11086000000	9063100000	9790600000	2294800000	7495800000
sp|P0ADC1|LPTE_ECOLI LPS-assembly lipoprotein LptE OS=Escherichia coli (strain K12) OX=83333 GN=lptE PE=1 SV=1;sp|C4ZWC8|LPTE_ECOBW LPS-assembly lipoprotein LptE OS=Escherichia coli (strain K12 / MC4100 / BW2952) OX=595496 GN=lptE PE=3 SV=1	P0ADC1	LPS-assembly lipoprotein LptE	lptE	0.40837	28.9959	0.6318	38.718	0.47194	32.0624	2.9311	74.5618		7	8	9	7	7	8	9	7	48.7	21.356	1004000000	913110000	90932000	2173300000	1247900000	925400000	2231300000	1194100000	1037300000	489620000	110000000	379620000
sp|P0ADC3|LOLC_ECOLI Lipoprotein-releasing system transmembrane protein LolC OS=Escherichia coli (strain K12) OX=83333 GN=lolC PE=1 SV=1	P0ADC3	Lipoprotein-releasing system transmembrane protein LolC	lolC										6	3	5		6	3	5	1	26.6	43.263	190010000	148960000	41050000	30979000	30979000	0	40950000	40950000	0	0	0	0
sp|P0ADC6|LPTG_ECOLI Lipopolysaccharide export system permease protein LptG OS=Escherichia coli (strain K12) OX=83333 GN=lptG PE=1 SV=1	P0ADC6	Lipopolysaccharide export system permease protein LptG	lptG			0.84635	45.8391	0.63314	38.7683				6	6	7	5	6	6	7	5	38.3	39.618	1405900000	1265600000	140310000	2063400000	1053800000	1009600000	2439300000	1554700000	884640000	289170000	113150000	176020000
sp|P0ADE4|TAMA_ECOLI Translocation and assembly module subunit TamA OS=Escherichia coli (strain K12) OX=83333 GN=tamA PE=1 SV=1	P0ADE4	Translocation and assembly module TamA	tamA	0.37366	27.2018	0.35662	26.2874	0.35977	26.4582	2.8031	73.7057		16	17	17	9	16	17	17	9	44.4	64.795	1044300000	842020000	202230000	1160700000	917990000	242710000	1272800000	996670000	276090000	251920000	55093000	196830000
sp|P0ADE6|YGAU_ECOLI Uncharacterized protein YgaU OS=Escherichia coli (strain K12) OX=83333 GN=ygaU PE=1 SV=2	P0ADE6	Uncharacterized protein YgaU	ygaU	0.67408	40.2657	0.66417	39.91	0.63229	38.7364	3.5286	77.9181		11	12	12	13	11	12	12	13	81.9	16.063	9511600000	5696700000	3814900000	11812000000	6971400000	4840600000	11027000000	6839300000	4187700000	20185000000	3774500000	16410000000
sp|P0ADE8|YGFZ_ECOLI tRNA-modifying protein YgfZ OS=Escherichia coli (strain K12) OX=83333 GN=ygfZ PE=1 SV=2;sp|C5A0H0|YGFZ_ECOBW tRNA-modifying protein YgfZ OS=Escherichia coli (strain K12 / MC4100 / BW2952) OX=595496 GN=ygfZ PE=3 SV=1;sp|B1XEI5|YGFZ_ECOD	P0ADE8	tRNA-modifying protein YgfZ	ygfZ	0.42872	30.0073	0.48048	32.4543	0.42636	29.8915	2.8072	73.734		13	10	11	13	13	10	11	13	61.3	36.094	2650500000	2010900000	639590000	1917600000	1254400000	663180000	2065400000	1217500000	847860000	3197200000	653100000	2544000000
sp|P0ADF6|EDD_ECOLI Phosphogluconate dehydratase OS=Escherichia coli (strain K12) OX=83333 GN=edd PE=1 SV=1	P0ADF6	Phosphogluconate dehydratase	edd											3	3	2	1	3	3	2	10.6	64.638	0	0	0	103690000	81083000	22608000	81068000	42953000	38115000	32834000	10672000	22162000
sp|P0ADF8|ILVN_ECOLI Acetolactate synthase isozyme 1 small subunit OS=Escherichia coli (strain K12) OX=83333 GN=ilvN PE=1 SV=1	P0ADF8	Acetolactate synthase isozyme 1 small subunit	ilvN										2	2	2	3	2	2	2	3	44.8	11.106	118810000	83822000	34990000	148030000	101830000	46202000	10058000	10058000	0	23028000	0	23028000
sp|P0ADG4|SUHB_ECOLI Inositol-1-monophosphatase OS=Escherichia coli (strain K12) OX=83333 GN=suhB PE=1 SV=1	P0ADG4	Inositol-1-monophosphatase	suhB	0.43041	30.09	0.47273	32.0989	0.52841	34.5725	1.5013	60.0208		8	10	8	11	8	10	8	11	60.3	29.172	1596400000	1074200000	522230000	1368200000	908320000	459880000	1405500000	940350000	465110000	1228200000	519710000	708450000
sp|P0ADG7|IMDH_ECOLI Inosine-5-monophosphate dehydrogenase OS=Escherichia coli (strain K12) OX=83333 GN=guaB PE=1 SV=1	P0ADG7	Inosine-5-monophosphate dehydrogenase	guaB	0.421	29.627	0.47963	32.4155	0.49392	33.062	2.6494	72.5982		26	28	28	27	26	28	28	27	78.1	52.022	21288000000	14515000000	6773000000	14853000000	9505600000	5347800000	20741000000	13724000000	7016500000	18051000000	4778500000	13272000000
sp|P0ADI4|ENTB_ECOLI Enterobactin synthase component B OS=Escherichia coli (strain K12) OX=83333 GN=entB PE=1 SV=1	P0ADI4	Enterobactin synthase component B;Isochorismatase;Aryl carrier protein	entB	0.019661	1.92819	0.025084	2.44702	0.024495	2.39093	3.5153	77.8531		14	14	15	18	14	14	15	18	60.4	32.554	10343000000	10257000000	86248000	9169700000	8983500000	186230000	8205500000	8070700000	134840000	21402000000	4234500000	17167000000
sp|P0ADI7|YECD_ECOLI Isochorismatase family protein YecD OS=Escherichia coli (strain K12) OX=83333 GN=yecD PE=1 SV=2	P0ADI7	Isochorismatase family protein YecD	yecD							3.0212	75.1318		2	2	4	5	2	2	4	5	31.4	20.452	162190000	95745000	66447000	202140000	124750000	77386000	291940000	207730000	84208000	678890000	178450000	500440000
sp|P0ADK0|YIAF_ECOLI Uncharacterized protein YiaF OS=Escherichia coli (strain K12) OX=83333 GN=yiaF PE=4 SV=2	P0ADK0	Uncharacterized protein YiaF	yiaF	0.43026	30.0826	0.46335	31.6636	0.46836	31.8968	3.2124	76.2606		7	10	6	5	7	10	6	5	44.9	25.663	1863700000	1335100000	528600000	2433500000	1664300000	769220000	1733800000	1260600000	473180000	485720000	105980000	379740000
sp|P0ADK6|YIBA_ECOLI Protein YibA OS=Escherichia coli (strain K12) OX=83333 GN=yibA PE=1 SV=1	P0ADK6	Protein YibA	yibA										2				2	0	0	0	8.2	31.873	8730800	0	8730800	0	0	0	0	0	0	0	0	0
sp|P0ADK8|YIBL_ECOLI Uncharacterized protein YibL OS=Escherichia coli (strain K12) OX=83333 GN=yibL PE=1 SV=1	P0ADK8	Uncharacterized protein YibL	yibL											2	2	3	1	2	2	3	38.3	13.696	0	0	0	41707000	29742000	11965000	0	0	0	45090000	10287000	34803000
sp|P0ADM4|YIDQ_ECOLI Uncharacterized protein YidQ OS=Escherichia coli (strain K12) OX=83333 GN=yidQ PE=3 SV=1	P0ADM4	Uncharacterized protein YidQ	yidQ										2	2		2	2	2	1	2	32.7	11.826	156070000	156070000	0	164840000	106310000	58532000	137200000	80283000	56915000	88944000	0	88944000
sp|P0ADN2|YIFE_ECOLI UPF0438 protein YifE OS=Escherichia coli (strain K12) OX=83333 GN=yifE PE=1 SV=2	P0ADN2	UPF0438 protein YifE	yifE	0.73769	42.4523			0.63249	38.7439	2.8888	74.2851		3	5	3	8	3	5	3	8	84.8	13.133	694360000	245200000	449160000	408510000	174400000	234100000	834400000	545930000	288470000	4231900000	940320000	3291600000
sp|P0ADN6|YIFL_ECOLI Uncharacterized lipoprotein YifL OS=Escherichia coli (strain K12) OX=83333 GN=yifL PE=3 SV=1	P0ADN6	Uncharacterized lipoprotein YifL	yifL			0.308	23.5474	0.31315	23.8472	3.237	76.3984		3	4	5	3	3	4	5	3	50.7	7.1771	3903300000	3744500000	158830000	4630900000	4162000000	468960000	4552500000	4150900000	401610000	832540000	46512000	786030000
sp|P0ADP0|YIGB_ECOLI 5-amino-6-(5-phospho-D-ribitylamino)uracil phosphatase YigB OS=Escherichia coli (strain K12) OX=83333 GN=yigB PE=1 SV=1	P0ADP0	Flavin mononucleotide phosphatase YigB	yigB			0.41058	29.1072	0.569	36.2651				5	7	7	4	5	7	7	4	67.2	27.122	269710000	255180000	14530000	597720000	515710000	82007000	283200000	204820000	78380000	55599000	0	55599000
sp|P0ADP2|YIGI_ECOLI Uncharacterized protein YigI OS=Escherichia coli (strain K12) OX=83333 GN=yigI PE=4 SV=1	P0ADP2	Uncharacterized protein YigI	yigI	0.59241	37.2021	0.57279	36.4187	0.62758	38.5591				5	5	5	3	5	5	5	3	36.8	17.163	527940000	312820000	215120000	268750000	156730000	112020000	323620000	185200000	138430000	162470000	15116000	147350000
sp|P0ADP9|YIHD_ECOLI Protein YihD OS=Escherichia coli (strain K12) OX=83333 GN=yihD PE=1 SV=1	P0ADP9	Protein YihD	yihD													2	1	1	1	2	40.4	10.273	82410000	82410000	0	103090000	103090000	0	29128000	0	29128000	294100000	71077000	223020000
sp|P0ADQ2|YIID_ECOLI Uncharacterized protein YiiD OS=Escherichia coli (strain K12) OX=83333 GN=yiiD PE=4 SV=1	P0ADQ2	Uncharacterized protein YiiD	yiiD	0.49391	33.0616	0.52162	34.2806	0.50964	33.759	3.4366	77.4602		6	5	4	4	6	5	4	4	25.2	37.094	1166400000	832380000	334010000	679200000	497800000	181400000	591940000	402770000	189170000	385750000	85297000	300450000
sp|P0ADQ7|YGAM_ECOLI Uncharacterized protein YgaM OS=Escherichia coli (strain K12) OX=83333 GN=ygaM PE=1 SV=2	P0ADQ7	Uncharacterized protein YgaM	ygaM	0.98311	49.5742	0.98659	49.6625	0.90884	47.6122				3	3	3		3	3	3	1	58.7	11.847	628310000	311600000	316710000	968690000	479750000	488940000	2615000000	1368700000	1246200000	545600000	80311000	465290000
sp|P0ADR6|RLMM_ECOLI Ribosomal RNA large subunit methyltransferase M OS=Escherichia coli (strain K12) OX=83333 GN=rlmM PE=1 SV=1;sp|C4ZZW1|RLMM_ECOBW Ribosomal RNA large subunit methyltransferase M OS=Escherichia coli (strain K12 / MC4100 / BW2952) OX=5954	P0ADR6	Ribosomal RNA large subunit methyltransferase M	rlmM										2	2		3	2	2	1	3	12.3	41.905	60729000	42368000	18361000	0	0	0	0	0	0	0	0	0
sp|P0ADR8|PPNN_ECOLI Pyrimidine/purine nucleotide 5-monophosphate nucleosidase OS=Escherichia coli (strain K12) OX=83333 GN=ppnN PE=1 SV=1	P0ADR8	LOG family protein YgdH	ygdH							2.8398	73.957		3	3	5	11	3	3	5	11	31.3	50.971	156420000	99756000	56666000	36461000	36461000	0	57209000	40953000	16256000	696140000	148260000	547880000
sp|P0ADS2|ZAPA_ECOLI Cell division protein ZapA OS=Escherichia coli (strain K12) OX=83333 GN=zapA PE=1 SV=1;sp|C5A0I2|ZAPA_ECOBW Cell division protein ZapA OS=Escherichia coli (strain K12 / MC4100 / BW2952) OX=595496 GN=zapA PE=3 SV=1;sp|B1XEJ6|ZAPA_ECODH	P0ADS2	Cell division protein ZapA	zapA										4	4	3	4	4	4	3	4	38.5	12.594	128610000	95926000	32683000	177970000	136770000	41200000	189340000	134910000	54431000	253430000	61174000	192260000
sp|P0ADS6|YGGE_ECOLI Uncharacterized protein YggE OS=Escherichia coli (strain K12) OX=83333 GN=yggE PE=4 SV=1	P0ADS6	Uncharacterized protein YggE	yggE	0.63803	38.9511	0.64048	39.0422	0.63787	38.9451	3.0833	75.51		12	12	13	13	12	12	13	13	45.5	26.635	6762200000	4130900000	2631300000	6843800000	4218500000	2625300000	7296400000	4331600000	2964900000	4673500000	1045900000	3627500000
sp|P0ADS9|YGGN_ECOLI Uncharacterized protein YggN OS=Escherichia coli (strain K12) OX=83333 GN=yggN PE=4 SV=1	P0ADS9	Uncharacterized protein YggN	yggN	0.48809	32.7998	0.47167	32.05	0.46473	31.728	2.543	71.7753		5	6	5	2	5	6	5	2	47.7	26.429	585100000	393940000	191160000	648860000	449500000	199360000	761440000	567940000	193500000	227850000	65863000	161990000
sp|P0ADT2|YGIB_ECOLI UPF0441 protein YgiB OS=Escherichia coli (strain K12) OX=83333 GN=ygiB PE=3 SV=2;sp|C4ZQV5|YGIB_ECOBW UPF0441 protein YgiB OS=Escherichia coli (strain K12 / MC4100 / BW2952) OX=595496 GN=ygiB PE=3 SV=1	P0ADT2	UPF0441 protein YgiB	ygiB	0.99278	49.8188	1.0239	50.5904	0.9331	48.2696	4.2282	80.873		2	2	3	2	2	2	3	2	18.4	23.479	535760000	256690000	279080000	827340000	378210000	449130000	1069600000	529300000	540340000	704900000	131180000	573720000
sp|P0ADT5|YGIC_ECOLI Putative acid--amine ligase YgiC OS=Escherichia coli (strain K12) OX=83333 GN=ygiC PE=1 SV=1	P0ADT5	Putative acid--amine ligase YgiC	ygiC							2.3315	69.9835		2	3	3	10	2	3	3	10	31.6	45.025	131200000	87935000	43262000	176100000	132450000	43655000	221280000	143730000	77546000	905210000	179410000	725800000
sp|P0ADT8|YGIM_ECOLI Uncharacterized protein YgiM OS=Escherichia coli (strain K12) OX=83333 GN=ygiM PE=3 SV=1	P0ADT8	Uncharacterized protein YgiM	ygiM	0.70295	41.2784	0.74477	42.6859	0.77322	43.6054	2.6569	72.6544		9	8	9	5	9	8	9	5	59.2	23.076	4454600000	2611600000	1843000000	4208000000	2312300000	1895700000	4252000000	2422000000	1830000000	796530000	219040000	577490000
sp|P0ADU2|YGIN_ECOLI Probable quinol monooxygenase YgiN OS=Escherichia coli (strain K12) OX=83333 GN=ygiN PE=1 SV=1	P0ADU2	Probable quinol monooxygenase YgiN	ygiN							2.4367	70.9023					4	0	0	0	4	39.4	11.532	0	0	0	0	0	0	0	0	0	816970000	123070000	693900000
sp|P0ADU5|YGIW_ECOLI Protein YgiW OS=Escherichia coli (strain K12) OX=83333 GN=ygiW PE=1 SV=1	P0ADU5	Protein YgiW	ygiW	0.59754	37.4038	0.61937	38.2476	0.58476	36.899	3.1632	75.98		5	4	3	8	5	4	3	8	53.8	14.011	236820000	111200000	125620000	275000000	135290000	139710000	529440000	293720000	235720000	5858300000	941100000	4917200000
sp|P0ADV1|LPTA_ECOLI Lipopolysaccharide export system protein LptA OS=Escherichia coli (strain K12) OX=83333 GN=lptA PE=1 SV=1	P0ADV1	Lipopolysaccharide export system protein LptA	lptA	0.37078	27.0488	0.44567	30.8279	0.45527	31.2842	2.5969	72.1983		3	3	5	3	3	3	5	3	44.9	20.127	1105900000	794720000	311160000	1061700000	749610000	312080000	1302000000	868620000	433400000	1242300000	414120000	828170000
sp|P0ADV5|YHBW_ECOLI Luciferase-like monooxygenase OS=Escherichia coli (strain K12) OX=83333 GN=yhbW PE=4 SV=1	P0ADV5	Uncharacterized protein YhbW	yhbW										2		2	3	2	1	2	3	11	37.129	0	0	0	0	0	0	0	0	0	0	0	0
sp|P0ADV7|MLAC_ECOLI Probable phospholipid-binding protein MlaC OS=Escherichia coli (strain K12) OX=83333 GN=mlaC PE=1 SV=1	P0ADV7	Probable phospholipid-binding protein MlaC	mlaC	0.67963	40.4631	0.67973	40.4666	0.72441	42.0092	2.7266	73.1659		7	7	8	12	7	7	8	12	60.2	23.962	2419100000	1296300000	1122800000	2710000000	1431900000	1278100000	3524200000	2007300000	1516900000	3682000000	871010000	2811000000
sp|P0ADV9|LPTC_ECOLI Lipopolysaccharide export system protein LptC OS=Escherichia coli (strain K12) OX=83333 GN=lptC PE=1 SV=1	P0ADV9	Lipopolysaccharide export system protein LptC	lptC										3	2	3		3	2	3	1	21.5	21.702	132670000	94724000	37943000	104000000	63029000	40969000	137170000	90838000	46332000	43311000	11897000	31414000
sp|P0ADW3|YHCB_ECOLI Inner membrane protein YhcB OS=Escherichia coli (strain K12) OX=83333 GN=yhcB PE=1 SV=2	P0ADW3	Inner membrane protein YhcB	yhcB	0.35878	26.4046	0.38171	27.6259	0.37368	27.2028	2.5151	71.5513		13	12	13	11	13	12	13	11	75	14.961	3650000000	2813500000	836470000	3050200000	2135400000	914790000	4657600000	3537100000	1120500000	694960000	146490000	548470000
sp|P0ADX1|YHFA_ECOLI Protein YhfA OS=Escherichia coli (strain K12) OX=83333 GN=yhfA PE=1 SV=1	P0ADX1	Protein YhfA	yhfA							2.8035	73.7084			2	2	3	1	2	2	3	36.6	14.517	0	0	0	39981000	39981000	0	58450000	58450000	0	295870000	98393000	197470000
sp|P0ADX7|YHHA_ECOLI Uncharacterized protein YhhA OS=Escherichia coli (strain K12) OX=83333 GN=yhhA PE=1 SV=1	P0ADX7	Uncharacterized protein YhhA	yhhA					0.86457	46.3683	3.1428	75.8617		3	4	4	6	3	4	4	6	71.2	16.624	80615000	39648000	40967000	111680000	41684000	69993000	190910000	101360000	89550000	710540000	204670000	505880000
sp|P0ADX9|RSMD_ECOLI Ribosomal RNA small subunit methyltransferase D OS=Escherichia coli (strain K12) OX=83333 GN=rsmD PE=1 SV=1	P0ADX9	Ribosomal RNA small subunit methyltransferase D	rsmD							2.6062	72.27					2	0	0	0	2	16.7	21.677	0	0	0	0	0	0	0	0	0	139670000	42654000	97019000
sp|P0ADY1|PPID_ECOLI Peptidyl-prolyl cis-trans isomerase D OS=Escherichia coli (strain K12) OX=83333 GN=ppiD PE=1 SV=1	P0ADY1	Peptidyl-prolyl cis-trans isomerase D	ppiD	0.3745	27.2463	0.38571	27.8348	0.3947	28.3	2.4649	71.1391		30	30	33	25	30	30	33	25	71.1	68.149	15711000000	11878000000	3833100000	12373000000	9122800000	3250300000	14445000000	10496000000	3949100000	5006800000	1384100000	3622700000
sp|P0ADY3|RL14_ECOLI 50S ribosomal protein L14 OS=Escherichia coli (strain K12) OX=83333 GN=rplN PE=1 SV=1;sp|C4ZUG5|RL14_ECOBW 50S ribosomal protein L14 OS=Escherichia coli (strain K12 / MC4100 / BW2952) OX=595496 GN=rplN PE=3 SV=1;sp|B1X6G2|RL14_ECODH 50	P0ADY3	50S ribosomal protein L14	rplN	0.5208	34.2451	0.58392	36.8655	0.58007	36.7117	2.4126	70.6968		10	9	9	9	10	9	9	9	66.7	13.541	4356400000	2315000000	2041400000	5488300000	3396800000	2091500000	7351900000	4512600000	2839300000	5042900000	1482800000	3560200000
sp|P0ADY7|RL16_ECOLI 50S ribosomal protein L16 OS=Escherichia coli (strain K12) OX=83333 GN=rplP PE=1 SV=1;sp|C4ZUG8|RL16_ECOBW 50S ribosomal protein L16 OS=Escherichia coli (strain K12 / MC4100 / BW2952) OX=595496 GN=rplP PE=3 SV=1;sp|B1X6G5|RL16_ECODH 50	P0ADY7	50S ribosomal protein L16	rplP	0.49317	33.0284	0.54072	35.0953	0.52508	34.4297	2.1342	68.0939		9	9	10	8	9	9	10	8	61.8	15.281	22909000000	14951000000	7957800000	21967000000	13993000000	7974200000	26888000000	16908000000	9980200000	16909000000	4480700000	12428000000
sp|P0ADZ0|RL23_ECOLI 50S ribosomal protein L23 OS=Escherichia coli (strain K12) OX=83333 GN=rplW PE=1 SV=1	P0ADZ0	50S ribosomal protein L23	rplW	0.45095	31.0796	0.50148	33.399	0.52588	34.464	2.2397	69.1329		3	3	3	4	3	3	3	4	53	11.199	8900600000	6029100000	2871500000	10458000000	6927500000	3530100000	11507000000	7418600000	4088800000	5988900000	1841100000	4147800000
sp|P0ADZ4|RS15_ECOLI 30S ribosomal protein S15 OS=Escherichia coli (strain K12) OX=83333 GN=rpsO PE=1 SV=2;sp|C4ZSQ6|RS15_ECOBW 30S ribosomal protein S15 OS=Escherichia coli (strain K12 / MC4100 / BW2952) OX=595496 GN=rpsO PE=3 SV=1;sp|B1XGX7|RS15_ECODH 30	P0ADZ4	30S ribosomal protein S15	rpsO					0.44774	30.9268				3	3	4		3	3	4	1	65.2	10.269	421000000	346820000	74182000	473430000	365480000	107950000	877710000	478140000	399570000	0	0	0
sp|P0ADZ7|YAJC_ECOLI Sec translocon accessory complex subunit YajC OS=Escherichia coli (strain K12) OX=83333 GN=yajC PE=1 SV=1	P0ADZ7	UPF0092 membrane protein YajC	yajC	0.37707	27.3821	0.44249	30.6754	0.43834	30.4754	2.2958	69.6584		8	8	10	4	8	8	10	4	49.1	11.887	10321000000	7183700000	3137200000	9109400000	6302400000	2806900000	11205000000	7480300000	3724600000	3644200000	1034000000	2610200000
sp|P0AE01|TRMJ_ECOLI tRNA (cytidine/uridine-2-O-)-methyltransferase TrmJ OS=Escherichia coli (strain K12) OX=83333 GN=trmJ PE=1 SV=1	P0AE01	tRNA (cytidine/uridine-2-O-)-methyltransferase TrmJ	trmJ					0.38746	27.9259	2.2848	69.5567		6	5	7	5	6	5	7	5	31.7	27.048	151790000	30172000	121620000	94425000	64841000	29584000	778110000	562480000	215630000	538930000	152770000	386150000
sp|P0AE06|ACRA_ECOLI Multidrug efflux pump subunit AcrA OS=Escherichia coli (strain K12) OX=83333 GN=acrA PE=1 SV=1	P0AE06	Multidrug efflux pump subunit AcrA	acrA	0.4388	30.4976	0.45511	31.2767	0.46868	31.9116	2.3558	70.2008		24	21	23	16	24	21	23	16	81.4	42.196	19865000000	13622000000	6243700000	15123000000	9909700000	5213400000	14012000000	9190000000	4821800000	3343100000	945940000	2397100000
sp|P0AE08|AHPC_ECOLI Alkyl hydroperoxide reductase C OS=Escherichia coli (strain K12) OX=83333 GN=ahpC PE=1 SV=2	P0AE08	Alkyl hydroperoxide reductase subunit C	ahpC	0.40806	28.9803	0.43218	30.1764	0.42977	30.0587	2.968	74.7984		11	12	11	13	11	12	11	13	69.5	20.761	16586000000	12164000000	4421400000	22244000000	16422000000	5822700000	21379000000	14716000000	6662500000	43467000000	9915300000	33552000000
sp|P0AE12|AMN_ECOLI AMP nucleosidase OS=Escherichia coli (strain K12) OX=83333 GN=amn PE=1 SV=1	P0AE12	AMP nucleosidase	amn					0.5304	34.6576	3.022	75.1367		6	8	8	11	6	8	8	11	45.7	53.994	0	0	0	244110000	133860000	110240000	311320000	196350000	114970000	684920000	141240000	543680000
sp|P0AE14|AMPE_ECOLI Protein AmpE OS=Escherichia coli (strain K12) OX=83333 GN=ampE PE=1 SV=1	P0AE14	Protein AmpE	ampE	0.40571	28.8616								3				3	1	0	0	14.4	32.122	183340000	137600000	45744000	141660000	102740000	38923000	0	0	0	0	0	0
sp|P0AE18|MAP1_ECOLI Methionine aminopeptidase OS=Escherichia coli (strain K12) OX=83333 GN=map PE=1 SV=1	P0AE18	Methionine aminopeptidase	map			0.33501	25.0942			2.6873	72.8799		6	5	2	7	6	5	2	7	42.4	29.33	239100000	218650000	20452000	150250000	114140000	36106000	0	0	0	643510000	175770000	467740000
sp|P0AE22|APHA_ECOLI Class B acid phosphatase OS=Escherichia coli (strain K12) OX=83333 GN=aphA PE=1 SV=1	P0AE22	Class B acid phosphatase	aphA													2	1	0	1	2	17.7	26.103	79200000	79200000	0	0	0	0	0	0	0	46495000	9609600	36885000
sp|P0AE34|ARTQ_ECOLI Arginine ABC transporter permease protein ArtQ OS=Escherichia coli (strain K12) OX=83333 GN=artQ PE=1 SV=1	P0AE34	Arginine ABC transporter permease protein ArtQ	artQ										2	2			2	2	1	1	10.5	26.217	197610000	138570000	59041000	275140000	206020000	69118000	235370000	175170000	60197000	96120000	26919000	69201000
sp|P0AE39|YPDB_ECOLI Transcriptional regulatory protein YpdB OS=Escherichia coli (strain K12) OX=83333 GN=ypdB PE=1 SV=1	P0AE39	Transcriptional regulatory protein YpdB	ypdB	0.58587	36.9431	0.53111	34.6879	0.58996	37.1053	3.3744	77.1397		5	3	4	4	5	3	4	4	32.4	28.721	342580000	221970000	120610000	158610000	85518000	73087000	174850000	110030000	64817000	126760000	31511000	95248000
sp|P0AE48|YTFP_ECOLI Gamma-glutamylcyclotransferase family protein YtfP OS=Escherichia coli (strain K12) OX=83333 GN=ytfP PE=1 SV=1	P0AE48	Gamma-glutamylcyclotransferase family protein YtfP	ytfP													2	0	0	0	2	31	12.866	0	0	0	0	0	0	0	0	0	207360000	34850000	172510000
sp|P0AE52|BCP_ECOLI Peroxiredoxin Bcp OS=Escherichia coli (strain K12) OX=83333 GN=bcp PE=1 SV=1	P0AE52	Putative peroxiredoxin bcp	bcp	0.3723	27.1296	0.41899	29.5273	0.38969	28.0415	2.7939	73.6419		5	6	8	9	5	6	8	9	66.7	17.634	695870000	619350000	76519000	793030000	567880000	225150000	1072800000	895520000	177290000	4267800000	1106300000	3161500000
sp|P0AE63|CHAB_ECOLI Putative cation transport regulator ChaB OS=Escherichia coli (strain K12) OX=83333 GN=chaB PE=3 SV=1	P0AE63	Cation transport regulator ChaB	chaB							3.6036	78.2779					2	1	0	1	2	30.3	8.9447	171770000	84529000	87240000	0	0	0	166180000	90594000	75591000	762200000	154800000	607390000
sp|P0AE78|CORC_ECOLI Magnesium and cobalt efflux protein CorC OS=Escherichia coli (strain K12) OX=83333 GN=corC PE=1 SV=1	P0AE78	Magnesium and cobalt efflux protein CorC	corC	0.45169	31.1148	0.46283	31.6394	0.46721	31.8434	2.9175	74.4735		3	4	5	5	3	4	5	5	19.5	33.298	205080000	135540000	69538000	191930000	125620000	66318000	252070000	173750000	78326000	448930000	90281000	358650000
sp|P0AE82|CPXA_ECOLI Sensor histidine kinase CpxA OS=Escherichia coli (strain K12) OX=83333 GN=cpxA PE=1 SV=1	P0AE82	Sensor protein CpxA	cpxA	0.51527	34.0052	0.5205	34.2322	0.46117	31.5617	2.0671	67.3959		5	5	7	3	5	5	7	3	17.3	51.624	432240000	274630000	157600000	289640000	196390000	93245000	396050000	255240000	140820000	167110000	48347000	118770000
sp|P0AE88|CPXR_ECOLI Transcriptional regulatory protein CpxR OS=Escherichia coli (strain K12) OX=83333 GN=cpxR PE=1 SV=1	P0AE88	Transcriptional regulatory protein CpxR	cpxR	0.4776	32.3227	0.5172	34.0891	0.49936	33.3049	2.9719	74.8231		8	8	7	7	8	8	7	7	34.1	26.312	641880000	435930000	205950000	556700000	347390000	209310000	449010000	359580000	89431000	1353300000	306780000	1046500000
sp|P0AE91|CREA_ECOLI Protein CreA OS=Escherichia coli (strain K12) OX=83333 GN=creA PE=3 SV=1	P0AE91	Protein CreA	creA	0.32843	24.7232			0.41974	29.5646	2.4509	71.0221		3	2	2	5	3	2	2	5	52.2	17.108	435470000	317220000	118250000	119610000	119610000	0	431350000	314310000	117040000	500680000	132960000	367720000
sp|P0AEA8|CYSG_ECOLI Siroheme synthase OS=Escherichia coli (strain K12) OX=83333 GN=cysG PE=1 SV=1;sp|C4ZUM4|CYSG_ECOBW Siroheme synthase OS=Escherichia coli (strain K12 / MC4100 / BW2952) OX=595496 GN=cysG PE=3 SV=1;sp|B1X716|CYSG_ECODH Siroheme synthase	P0AEA8	Siroheme synthase;Uroporphyrinogen-III C-methyltransferase;Precorrin-2 dehydrogenase;Sirohydrochlorin ferrochelatase	cysG												2	2	1	1	2	2	8.3	49.951	36235000	36235000	0	41772000	27334000	14438000	85173000	67684000	17489000	56405000	16392000	40013000
sp|P0AEB2|DACA_ECOLI D-alanyl-D-alanine carboxypeptidase DacA OS=Escherichia coli (strain K12) OX=83333 GN=dacA PE=1 SV=1	P0AEB2	D-alanyl-D-alanine carboxypeptidase DacA	dacA	0.3941	28.2691	0.46682	31.8253	0.45388	31.2185	2.3487	70.1377		19	22	22	20	18	21	21	19	72.2	44.443	13690000000	9427900000	4262100000	14350000000	9540400000	4809400000	15100000000	9983300000	5116400000	5168100000	1559400000	3608700000
sp|P0AEB5|YNAI_ECOLI Low conductance mechanosensitive channel YnaI OS=Escherichia coli (strain K12) OX=83333 GN=ynaI PE=1 SV=1	P0AEB5	Low conductance mechanosensitive channel YnaI	ynaI										3	4	5	3	3	4	5	3	24.8	38.754	25539000	25539000	0	44245000	44245000	0	80136000	65374000	14762000	0	0	0
sp|P0AEB7|YOAB_ECOLI RutC family protein YoaB OS=Escherichia coli (strain K12) OX=83333 GN=yoaB PE=3 SV=1	P0AEB7	RutC family protein YoaB	yoaB	0.48732	32.765	0.49717	33.2073	0.52776	34.5447	2.645	72.5652		4	3	5	6	4	3	5	6	50	12.493	428540000	294000000	134540000	462140000	312060000	150070000	625630000	410840000	214780000	1260800000	327030000	933730000
sp|P0AEC3|ARCB_ECOLI Aerobic respiration control sensor protein ArcB OS=Escherichia coli (strain K12) OX=83333 GN=arcB PE=1 SV=1	P0AEC3	Aerobic respiration control sensor protein ArcB	arcB	0.33941	25.3403	0.43968	30.5401	0.41087	29.1217	2.6674	72.7327		12	16	20	6	12	16	20	6	36.8	87.982	1163800000	900410000	263350000	1862000000	1306500000	555410000	2539800000	2061900000	477920000	903850000	218450000	685400000
sp|P0AEC5|BARA_ECOLI Signal transduction histidine-protein kinase BarA OS=Escherichia coli (strain K12) OX=83333 GN=barA PE=1 SV=1	P0AEC5	Signal transduction histidine-protein kinase BarA	barA			0.49585	33.1484	0.6841	40.6211				6	7	7	2	6	7	7	2	17.2	102.45	153330000	131740000	21585000	352420000	293280000	59137000	364460000	307040000	57421000	17139000	0	17139000
sp|P0AED0|USPA_ECOLI Universal stress protein A OS=Escherichia coli (strain K12) OX=83333 GN=uspA PE=1 SV=2	P0AED0	Universal stress protein A	uspA	0.44168	30.6365	0.45937	31.4773	0.41032	29.0941	3.0629	75.387		4	4	4	5	4	4	4	5	58.3	16.066	8307900000	5768400000	2539500000	10291000000	7392400000	2898900000	15108000000	10815000000	4292100000	19460000000	6406400000	13054000000
sp|P0AED5|UVRY_ECOLI Response regulator UvrY OS=Escherichia coli (strain K12) OX=83333 GN=uvrY PE=1 SV=1	P0AED5	Response regulator UvrY	uvrY	0.64011	39.0285	0.73365	42.3182	0.75031	42.8673	2.8009	73.6904		7	5	6	5	7	5	6	5	50.9	23.892	2240300000	1309800000	930480000	1210600000	736530000	474110000	2330900000	1355600000	975290000	1012600000	77296000	935300000
sp|P0AED7|DAPE_ECOLI Succinyl-diaminopimelate desuccinylase OS=Escherichia coli (strain K12) OX=83333 GN=dapE PE=1 SV=1;sp|C4ZX46|DAPE_ECOBW Succinyl-diaminopimelate desuccinylase OS=Escherichia coli (strain K12 / MC4100 / BW2952) OX=595496 GN=dapE PE=3 SV	P0AED7	Succinyl-diaminopimelate desuccinylase	dapE										2	2		2	2	2	1	2	9.1	41.269	0	0	0	14770000	14770000	0	0	0	0	29265000	0	29265000
sp|P0AED9|DCM_ECOLI DNA-cytosine methyltransferase OS=Escherichia coli (strain K12) OX=83333 GN=dcm PE=1 SV=1	P0AED9	DNA-cytosine methyltransferase	dcm										4		2		4	1	2	0	12.7	53.464	33547000	33547000	0	24129000	9480800	14648000	0	0	0	0	0	0
sp|P0AEE1|DCRB_ECOLI Protein DcrB OS=Escherichia coli (strain K12) OX=83333 GN=dcrB PE=3 SV=1	P0AEE1	Protein DcrB	dcrB	0.47076	32.0079	0.53749	34.9589	0.54298	35.1903	2.4932	71.373		8	6	6	6	8	6	6	6	48.6	19.787	11601000000	7601800000	3998800000	9908200000	6616500000	3291600000	11973000000	7500100000	4472600000	2274800000	619090000	1655700000
sp|P0AEE3|DEGS_ECOLI Serine endoprotease DegS OS=Escherichia coli (strain K12) OX=83333 GN=degS PE=1 SV=1	P0AEE3	Serine endoprotease DegS	degS	0.37285	27.1588	0.41785	29.4707	0.49328	33.0333				5	3	5	2	5	3	5	2	22.3	37.581	250040000	185810000	64233000	272420000	188470000	83954000	287310000	191480000	95832000	154170000	30039000	124130000
sp|P0AEE5|DGAL_ECOLI D-galactose-binding periplasmic protein OS=Escherichia coli (strain K12) OX=83333 GN=mglB PE=1 SV=1	P0AEE5	D-galactose-binding periplasmic protein	mglB	0.38755	27.9305	0.45875	31.4482	0.45182	31.1209	2.0417	67.1236		7	6	6	5	7	6	6	5	34.6	35.712	1130600000	816800000	313790000	857200000	567490000	289710000	968080000	684190000	283890000	888650000	308830000	579820000
sp|P0AEF0|DNAC_ECOLI DNA replication protein DnaC OS=Escherichia coli (strain K12) OX=83333 GN=dnaC PE=1 SV=1	P0AEF0	DNA replication protein DnaC	dnaC	0.6586	39.7082								2	2	2	2	2	2	2	2	14.7	27.935	143040000	77735000	65303000	0	0	0	97777000	66745000	31032000	71226000	0	71226000
sp|P0AEF8|DPPB_ECOLI Dipeptide transport system permease protein DppB OS=Escherichia coli (strain K12) OX=83333 GN=dppB PE=1 SV=1	P0AEF8	Dipeptide transport system permease protein DppB	dppB										2				2	1	1	0	9.1	37.497	81558000	81558000	0	93803000	52618000	41185000	101660000	73340000	28320000	0	0	0
sp|P0AEG4|DSBA_ECOLI Thiol:disulfide interchange protein DsbA OS=Escherichia coli (strain K12) OX=83333 GN=dsbA PE=1 SV=1	P0AEG4	Thiol:disulfide interchange protein DsbA	dsbA	0.55714	35.7797	0.56466	36.0884	0.60743	37.7889	2.3306	69.9754		6	7	6	9	6	7	6	9	57.7	23.104	3421900000	2504600000	917310000	4058900000	2797600000	1261300000	2943200000	2028400000	914770000	5172900000	1456700000	3716300000
sp|P0AEG6|DSBC_ECOLI Thiol:disulfide interchange protein DsbC OS=Escherichia coli (strain K12) OX=83333 GN=dsbC PE=1 SV=1	P0AEG6	Thiol:disulfide interchange protein DsbC	dsbC	0.38248	27.6662	0.44206	30.6548	0.45256	31.156	2.7312	73.199		4	4	3	3	4	4	3	3	34.3	25.621	810830000	568090000	242730000	791610000	445610000	346000000	702590000	378950000	323640000	1117700000	182770000	934900000
sp|P0AEH1|RSEP_ECOLI Regulator of sigma-E protease RseP OS=Escherichia coli (strain K12) OX=83333 GN=rseP PE=1 SV=1	P0AEH1	Regulator of sigma-E protease RseP	rseP	0.42938	30.0396	0.50415	33.5173	0.49967	33.3187	2.7152	73.0835		9	7	10	5	9	7	10	5	35.6	49.071	1098500000	702750000	395780000	864770000	516170000	348600000	1116000000	719110000	396880000	2361700000	612530000	1749200000
sp|P0AEH3|ELAA_ECOLI Protein ElaA OS=Escherichia coli (strain K12) OX=83333 GN=elaA PE=3 SV=1	P0AEH3	Protein ElaA	elaA			0.51553	34.0165	0.45515	31.2786					2	2	3	1	2	2	3	20.9	17.419	138290000	98276000	40016000	170480000	107300000	63177000	191530000	127510000	64018000	216130000	47964000	168160000
sp|P0AEH5|ELAB_ECOLI Protein ElaB OS=Escherichia coli (strain K12) OX=83333 GN=elaB PE=1 SV=1	P0AEH5	Protein ElaB	elaB	0.71012	41.5246	0.60493	37.692	0.56109	35.9422	3.7024	78.7343		7	10	9	9	7	10	9	9	61.4	11.306	7508300000	4320600000	3187700000	7848200000	4579800000	3268400000	11946000000	7165400000	4780200000	8428100000	2726800000	5701300000
sp|P0AEI1|MIAB_ECOLI tRNA-2-methylthio-N(6)-dimethylallyladenosine synthase OS=Escherichia coli (strain K12) OX=83333 GN=miaB PE=1 SV=1;sp|B1X656|MIAB_ECODH tRNA-2-methylthio-N(6)-dimethylallyladenosine synthase OS=Escherichia coli (strain K12 / DH10B) OX=	P0AEI1	tRNA-2-methylthio-N(6)-dimethylallyladenosine synthase	miaB	0.66442	39.919			0.95771	48.9199				11	6	11	2	11	6	11	2	39	53.662	221860000	167080000	54773000	31707000	31707000	0	183630000	66358000	117270000	0	0	0
sp|P0AEI4|RIMO_ECOLI Ribosomal protein S12 methylthiotransferase RimO OS=Escherichia coli (strain K12) OX=83333 GN=rimO PE=1 SV=1;sp|B1X7X6|RIMO_ECODH Ribosomal protein S12 methylthiotransferase RimO OS=Escherichia coli (strain K12 / DH10B) OX=316385 GN=ri	P0AEI4	Ribosomal protein S12 methylthiotransferase RimO	rimO	0.51707	34.0835	0.60111	37.5433	0.67475	40.2896				12	9	12	3	12	9	12	3	51.9	49.581	1605000000	1015700000	589230000	604640000	384190000	220450000	1048200000	623940000	424270000	93188000	13444000	79744000
sp|P0AEJ2|ENTC_ECOLI Isochorismate synthase EntC OS=Escherichia coli (strain K12) OX=83333 GN=entC PE=1 SV=1	P0AEJ2	Isochorismate synthase EntC	entC							3.9484	79.7914		16	15	17	21	16	15	17	21	65.2	42.931	3588400000	3588400000	0	2742300000	2742300000	0	3275500000	3262500000	13012000	10570000000	1891200000	8678800000
sp|P0AEJ4|ENVZ_ECOLI Osmolarity sensor protein EnvZ OS=Escherichia coli (strain K12) OX=83333 GN=envZ PE=1 SV=1	P0AEJ4	Osmolarity sensor protein EnvZ	envZ										2	5	5		2	5	5	1	15.1	50.333	0	0	0	39916000	39916000	0	205510000	163020000	42496000	0	0	0
sp|P0AEJ6|EUTB_ECOLI Ethanolamine ammonia-lyase heavy chain OS=Escherichia coli (strain K12) OX=83333 GN=eutB PE=1 SV=1	P0AEJ6	Ethanolamine ammonia-lyase heavy chain	eutB			0.48095	32.4758						2	6	4	4	2	6	4	4	22.7	49.403	24821000	0	24821000	236630000	179340000	57297000	65225000	43296000	21929000	124690000	40622000	84067000
sp|P0AEK0|EXOX_ECOLI Exodeoxyribonuclease 10 OS=Escherichia coli (strain K12) OX=83333 GN=exoX PE=1 SV=1	P0AEK0	Exodeoxyribonuclease 10	exoX													2	1	1	0	2	23.6	25.133	0	0	0	0	0	0	0	0	0	0	0	0
sp|P0AEL6|FEPB_ECOLI Ferrienterobactin-binding periplasmic protein OS=Escherichia coli (strain K12) OX=83333 GN=fepB PE=1 SV=1	P0AEL6	Ferrienterobactin-binding periplasmic protein	fepB							2.9798	74.8731		3	3	3	5	3	3	3	5	25.5	34.283	440140000	341200000	98932000	81061000	81061000	0	287850000	273830000	14021000	1420100000	352760000	1067400000
sp|P0AEM4|FLGM_ECOLI Negative regulator of flagellin synthesis OS=Escherichia coli (strain K12) OX=83333 GN=flgM PE=1 SV=1	P0AEM4	Negative regulator of flagellin synthesis	flgM													2	0	0	0	2	35.1	10.34	0	0	0	0	0	0	0	0	0	42633000	0	42633000
sp|P0AEM9|FLIY_ECOLI L-cystine-binding protein FliY OS=Escherichia coli (strain K12) OX=83333 GN=fliY PE=1 SV=1	P0AEM9	Cystine-binding periplasmic protein	fliY	0.51566	34.0221	0.53588	34.8907	0.53133	34.6973	2.5751	72.0288		26	27	27	28	26	27	27	28	83.8	29.039	17684000000	11146000000	6538100000	17977000000	11354000000	6622900000	20336000000	12433000000	7903100000	13150000000	3711600000	9438300000
sp|P0AEN1|FRE_ECOLI NAD(P)H-flavin reductase OS=Escherichia coli (strain K12) OX=83333 GN=fre PE=1 SV=2	P0AEN1	NAD(P)H-flavin reductase	fre					0.52358	34.3651				5	3	5	8	5	3	5	8	45.1	26.242	300650000	93919000	206730000	108880000	108880000	0	156660000	117770000	38894000	187750000	98875000	88874000
sp|P0AEN4|FTSL_ECOLI Cell division protein FtsL OS=Escherichia coli (strain K12) OX=83333 GN=ftsL PE=1 SV=1	P0AEN4	Cell division protein FtsL	ftsL	0.47625	32.2608								2				2	1	1	1	28.1	13.627	363990000	226080000	137900000	352490000	224820000	127670000	369410000	234890000	134520000	152540000	41815000	110730000
sp|P0AEN8|FUCM_ECOLI L-fucose mutarotase OS=Escherichia coli (strain K12) OX=83333 GN=fucU PE=1 SV=1;sp|C4ZZV9|FUCM_ECOBW L-fucose mutarotase OS=Escherichia coli (strain K12 / MC4100 / BW2952) OX=595496 GN=fucU PE=3 SV=1;sp|B1XDL3|FUCM_ECODH L-fucose mutar	P0AEN8	L-fucose mutarotase	fucU										3		2	3	3	1	2	3	44.3	15.473	193800000	95391000	98413000	143790000	97540000	46252000	98533000	98533000	0	81289000	0	81289000
sp|P0AEP1|GALP_ECOLI Galactose-proton symporter OS=Escherichia coli (strain K12) OX=83333 GN=galP PE=1 SV=1	P0AEP1	Galactose-proton symporter	galP										3	3	4		3	3	4	0	9.9	50.982	317720000	113360000	204360000	290540000	104320000	186220000	169900000	0	169900000	0	0	0
sp|P0AEP3|GALU_ECOLI UTP--glucose-1-phosphate uridylyltransferase OS=Escherichia coli (strain K12) OX=83333 GN=galU PE=1 SV=2	P0AEP3	UTP--glucose-1-phosphate uridylyltransferase	galU	0.71146	41.5704	0.77141	43.5478	0.76803	43.4399	2.7223	73.1349		14	16	16	16	14	16	16	16	64.6	32.942	11687000000	6790700000	4896100000	9444600000	5272700000	4171800000	9820000000	5913000000	3907000000	7502300000	2082400000	5419900000
sp|P0AEQ3|GLNH_ECOLI Glutamine-binding periplasmic protein OS=Escherichia coli (strain K12) OX=83333 GN=glnH PE=1 SV=1	P0AEQ3	Glutamine-binding periplasmic protein	glnH	0.38061	27.5682	0.43854	30.4851	0.4775	32.3181	2.323	69.9067		13	15	16	13	13	15	16	13	58.1	27.19	5268700000	4083800000	1184800000	7944800000	5434800000	2509900000	6907600000	4623900000	2283700000	6350900000	1207700000	5143200000
sp|P0AER3|GLTJ_ECOLI Glutamate/aspartate import permease protein GltJ OS=Escherichia coli (strain K12) OX=83333 GN=gltJ PE=3 SV=1	P0AER3	Glutamate/aspartate transport system permease protein GltJ	gltJ	0.31659	24.0462	0.46787	31.8741	0.40111	28.628				3	2	2	2	3	2	2	2	19.9	27.502	189140000	141400000	47734000	195480000	133830000	61655000	141660000	99313000	42348000	8906000	0	8906000
sp|P0AES0|GSP_ECOLI Bifunctional glutathionylspermidine synthetase/amidase OS=Escherichia coli (strain K12) OX=83333 GN=gss PE=1 SV=1	P0AES0	Bifunctional glutathionylspermidine synthetase/amidase;Glutathionylspermidine amidase;Glutathionylspermidine synthetase	gss	0.5847	36.8966	0.6204	38.2868	0.58836	37.042	2.8421	73.9726		9	10	8	12	9	10	8	12	32.1	70.531	858270000	610190000	248080000	640970000	491650000	149320000	492510000	370330000	122170000	884930000	157860000	727060000
sp|P0AES2|GUDD_ECOLI Glucarate dehydratase OS=Escherichia coli (strain K12) OX=83333 GN=gudD PE=1 SV=2	P0AES2	Glucarate dehydratase	gudD													2	1	1	1	2	12.6	49.14	0	0	0	0	0	0	0	0	0	34596000	0	34596000
sp|P0AES4|GYRA_ECOLI DNA gyrase subunit A OS=Escherichia coli (strain K12) OX=83333 GN=gyrA PE=1 SV=1	P0AES4	DNA gyrase subunit A	gyrA	0.53032	34.6542	0.58062	36.7337	0.56937	36.2802	2.6904	72.9027		24	29	26	37	24	29	26	37	45.1	96.962	3440600000	2360600000	1080000000	2855200000	1660100000	1195000000	2802200000	1735100000	1067200000	5076700000	1070000000	4006700000
sp|P0AES6|GYRB_ECOLI DNA gyrase subunit B OS=Escherichia coli (strain K12) OX=83333 GN=gyrB PE=1 SV=2	P0AES6	DNA gyrase subunit B	gyrB	0.49555	33.135	0.53439	34.8275	0.52392	34.3798	2.5694	71.9841		31	25	27	24	31	25	27	24	49	89.949	7530900000	5550100000	1980800000	5540700000	3673200000	1867500000	6722200000	4563300000	2158900000	4217000000	1142300000	3074700000
sp|P0AES9|HDEA_ECOLI Acid stress chaperone HdeA OS=Escherichia coli (strain K12) OX=83333 GN=hdeA PE=1 SV=1	P0AES9	Acid stress chaperone HdeA	hdeA	0.629	38.6126	0.64803	39.3215	0.6098	37.8805				3	3	4		3	3	4	1	65.5	11.857	8931900000	5348400000	3583600000	13934000000	8091600000	5842900000	12315000000	7013100000	5301400000	10035000000	0	10035000000
sp|P0AET2|HDEB_ECOLI Acid stress chaperone HdeB OS=Escherichia coli (strain K12) OX=83333 GN=hdeB PE=1 SV=1	P0AET2	Acid stress chaperone HdeB	hdeB	0.70483	41.3431	0.72782	42.1236	0.68387	40.613	3.7892	79.1197		3	3	3	4	3	3	3	4	51.9	12.043	8559100000	4950200000	3608900000	8283500000	4719400000	3564100000	10038000000	5826600000	4211000000	22305000000	4340000000	17965000000
sp|P0AET8|HDHA_ECOLI 7-alpha-hydroxysteroid dehydrogenase OS=Escherichia coli (strain K12) OX=83333 GN=hdhA PE=1 SV=1	P0AET8	7-alpha-hydroxysteroid dehydrogenase	hdhA	0.67922	40.4485	0.60841	37.8268	0.59722	37.3912	3.4483	77.5195		10	12	10	16	10	12	10	16	66.7	26.778	2182300000	1333600000	848750000	2711500000	1782100000	929410000	2218900000	1435300000	783540000	9680700000	2206500000	7474200000
sp|P0AEU0|HISJ_ECOLI Histidine-binding periplasmic protein OS=Escherichia coli (strain K12) OX=83333 GN=hisJ PE=1 SV=1	P0AEU0	Histidine-binding periplasmic protein	hisJ	0.317	24.0699	0.38837	27.9731	0.42041	29.5978	1.6993	62.9534		13	13	16	14	13	13	16	14	81.5	28.483	10864000000	8306300000	2558000000	13931000000	9841400000	4089900000	15123000000	10680000000	4442200000	12611000000	4560200000	8050800000
sp|P0AEU7|SKP_ECOLI Chaperone protein Skp OS=Escherichia coli (strain K12) OX=83333 GN=skp PE=1 SV=1	P0AEU7	Chaperone protein Skp	skp	0.38775	27.9409	0.4353	30.3282	0.42741	29.943	2.7595	73.4007		7	10	7	11	7	10	7	11	68.3	17.688	14373000000	10190000000	4183000000	16245000000	11206000000	5039400000	18463000000	12569000000	5894700000	13635000000	3492700000	10142000000
sp|P0AEV1|RSSB_ECOLI Regulator of RpoS OS=Escherichia coli (strain K12) OX=83333 GN=rssB PE=1 SV=1	P0AEV1	Regulator of RpoS	rssB										4		2		4	1	2	0	18.4	37.302	28219000	28219000	0	0	0	0	19799000	19799000	0	0	0	0
sp|P0AEW4|CPDA_ECOLI 3,5-cyclic adenosine monophosphate phosphodiesterase CpdA OS=Escherichia coli (strain K12) OX=83333 GN=cpdA PE=1 SV=1	P0AEW4	3,5-cyclic adenosine monophosphate phosphodiesterase CpdA	cpdA													3	0	0	0	3	14.5	30.938	0	0	0	0	0	0	0	0	0	27332000	0	27332000
sp|P0AEX5|KPPR_ECOLI Probable phosphoribulokinase OS=Escherichia coli (strain K12) OX=83333 GN=prkB PE=3 SV=1	P0AEX5	Probable phosphoribulokinase	prkB	0.40803	28.9788	0.49579	33.1457	0.4421	30.6567				4	3	3	3	4	3	3	3	27.3	32.344	479030000	357880000	121160000	336840000	236790000	100050000	496100000	321040000	175070000	240270000	38597000	201680000
sp|P0AEX9|MALE_ECOLI Maltose-binding periplasmic protein OS=Escherichia coli (strain K12) OX=83333 GN=malE PE=1 SV=1	P0AEX9	Maltose-binding periplasmic protein	malE	0.19785	16.5171	0.20166	16.7818	0.23279	18.8832	1.2842	56.221		11	13	12	7	11	13	12	7	56.1	43.387	1515900000	1204700000	311190000	1499000000	1262000000	236970000	1877400000	1559800000	317570000	737340000	321220000	416110000
sp|P0AEY5|MDAB_ECOLI Modulator of drug activity B OS=Escherichia coli (strain K12) OX=83333 GN=mdaB PE=1 SV=1	P0AEY5	Modulator of drug activity B	mdaB	0.57959	36.6924					3.2172	76.2876		2			7	2	1	1	7	46.6	21.891	199360000	103360000	96002000	67996000	35381000	32615000	205130000	119120000	86012000	2247300000	494730000	1752600000
sp|P0AEZ1|METF_ECOLI 5,10-methylenetetrahydrofolate reductase OS=Escherichia coli (strain K12) OX=83333 GN=metF PE=1 SV=1	P0AEZ1	5,10-methylenetetrahydrofolate reductase	metF	0.56525	36.1124	0.63963	39.0106	0.64774	39.3108	2.2709	69.4274		20	19	19	12	20	19	19	12	77.7	33.102	11984000000	7196900000	4786900000	9469300000	5514300000	3955000000	14097000000	8040800000	6056600000	3511100000	1012700000	2498300000
sp|P0AEZ3|MIND_ECOLI Septum site-determining protein MinD OS=Escherichia coli (strain K12) OX=83333 GN=minD PE=1 SV=2	P0AEZ3	Septum site-determining protein MinD	minD	0.43378	30.2543	0.45907	31.4632	0.43647	30.3849	2.8637	74.1181		21	21	21	16	21	21	21	16	67.8	29.614	10724000000	7299300000	3424300000	9092700000	6258800000	2833900000	16406000000	10676000000	5729800000	7339200000	1902500000	5436700000
sp|P0AEZ9|MOAB_ECOLI Molybdenum cofactor biosynthesis protein B OS=Escherichia coli (strain K12) OX=83333 GN=moaB PE=1 SV=2	P0AEZ9	Molybdenum cofactor biosynthesis protein B	moaB	0.54339	35.2076	0.49658	33.181	0.45228	31.1428	3.375	77.1429		5	6	5	6	5	6	5	6	41.8	18.665	817380000	531540000	285840000	1039600000	671590000	367970000	842700000	571960000	270750000	1369400000	234670000	1134700000
sp|P0AF03|MOG_ECOLI Molybdopterin adenylyltransferase OS=Escherichia coli (strain K12) OX=83333 GN=mog PE=1 SV=1	P0AF03	Molybdopterin adenylyltransferase	mog											2	3	3	1	2	3	3	36.4	21.222	72105000	45626000	26479000	98306000	63697000	34608000	78199000	50987000	27211000	214000000	61338000	152660000
sp|P0AF08|APBC_ECOLI Iron-sulfur cluster carrier protein OS=Escherichia coli (strain K12) OX=83333 GN=mrp PE=3 SV=1	P0AF08	Protein mrp	mrp	0.43107	30.1222	0.53585	34.8895	0.5452	35.2835	2.1744	68.498		6	4	5	4	6	4	5	4	19.8	39.938	1584600000	1272100000	312570000	861150000	676050000	185100000	1195800000	822730000	373090000	502500000	146540000	355960000
sp|P0AF12|MTNN_ECOLI 5-methylthioadenosine/S-adenosylhomocysteine nucleosidase OS=Escherichia coli (strain K12) OX=83333 GN=mtnN PE=1 SV=1;sp|C4ZRQ2|MTNN_ECOBW 5-methylthioadenosine/S-adenosylhomocysteine nucleosidase OS=Escherichia coli (strain K12 / MC	P0AF12	5-methylthioadenosine/S-adenosylhomocysteine nucleosidase	mtnN			0.44345	30.7215	0.44573	30.8308	2.4986	71.4171		3	4	5	7	3	4	5	7	54.7	24.354	441140000	356870000	84273000	338400000	259280000	79118000	752010000	580350000	171650000	1363800000	380430000	983380000
sp|P0AF16|MURJ_ECOLI Lipid II flippase MurJ OS=Escherichia coli (strain K12) OX=83333 GN=murJ PE=1 SV=1	P0AF16	Lipid II flippase MurJ	murJ												2		1	1	2	0	3.5	55.267	0	0	0	0	0	0	0	0	0	0	0	0
sp|P0AF18|NAGA_ECOLI N-acetylglucosamine-6-phosphate deacetylase OS=Escherichia coli (strain K12) OX=83333 GN=nagA PE=1 SV=1	P0AF18	N-acetylglucosamine-6-phosphate deacetylase	nagA	0.68966	40.8165	0.63191	38.7221	0.5884	37.0436	3.2087	76.2397		5	7	7	7	5	7	7	7	33.2	40.949	431520000	268650000	162860000	594000000	378510000	215490000	833370000	537850000	295520000	1271900000	301020000	970900000
sp|P0AF20|NAGC_ECOLI N-acetylglucosamine repressor OS=Escherichia coli (strain K12) OX=83333 GN=nagC PE=2 SV=1	P0AF20	N-acetylglucosamine repressor	nagC	0.37365	27.2013	0.42165	29.6592	0.42639	29.8929				7	8	12	7	7	8	12	7	46.8	44.541	963530000	613810000	349720000	592370000	340290000	252090000	749340000	445760000	303580000	397110000	98144000	298970000
sp|P0AF24|NAGD_ECOLI Ribonucleotide monophosphatase NagD OS=Escherichia coli (strain K12) OX=83333 GN=nagD PE=1 SV=1	P0AF24	Ribonucleotide monophosphatase NagD	nagD	0.48487	32.654	0.47188	32.0597	0.52983	34.6333	2.7532	73.3561		5	5	7	7	5	5	7	7	43.2	27.163	306660000	220980000	85683000	288990000	213670000	75322000	255250000	190460000	64787000	466770000	106970000	359800000
sp|P0AF28|NARL_ECOLI Nitrate/nitrite response regulator protein NarL OS=Escherichia coli (strain K12) OX=83333 GN=narL PE=1 SV=1	P0AF28	Nitrate/nitrite response regulator protein NarL	narL	0.54106	35.1096	0.46783	31.8722	0.5048	33.546	3.2211	76.3095		5	8	9	10	5	8	9	10	53.7	23.927	543370000	350780000	192590000	752940000	480860000	272090000	944230000	641010000	303220000	2934600000	688800000	2245800000
sp|P0AF36|ZAPB_ECOLI Cell division protein ZapB OS=Escherichia coli (strain K12) OX=83333 GN=zapB PE=1 SV=1;sp|C5A095|ZAPB_ECOBW Cell division protein ZapB OS=Escherichia coli (strain K12 / MC4100 / BW2952) OX=595496 GN=zapB PE=3 SV=1;sp|B1XB94|ZAPB_ECODH	P0AF36	Cell division protein ZapB	zapB	0.55673	35.7628	0.62033	38.2842	0.61354	38.0245	2.4536	71.0447		5	4	4	4	5	4	4	4	80.2	9.6347	12450000000	7643700000	4806500000	12425000000	7611400000	4813700000	9226300000	5598000000	3628300000	8003700000	1736000000	6267700000
sp|P0AF43|YJBB_ECOLI Uncharacterized protein YjbB OS=Escherichia coli (strain K12) OX=83333 GN=yjbB PE=4 SV=1	P0AF43	Uncharacterized protein YjbB	yjbB	0.40318	28.7333	0.40728	28.9409	0.41843	29.4995				3	5	5		3	5	5	1	12.2	59.466	335100000	217130000	117970000	382010000	265850000	116170000	335900000	220790000	115110000	32120000	0	32120000
sp|P0AF48|YJBQ_ECOLI UPF0047 protein YjbQ OS=Escherichia coli (strain K12) OX=83333 GN=yjbQ PE=3 SV=1	P0AF48	UPF0047 protein YjbQ	yjbQ							4.1592	80.6171					2	1	1	0	2	26.8	15.656	27074000	17960000	9113800	28423000	16569000	11854000	0	0	0	125550000	28518000	97030000
sp|P0AF50|YJBR_ECOLI Uncharacterized protein YjbR OS=Escherichia coli (strain K12) OX=83333 GN=yjbR PE=1 SV=1	P0AF50	Uncharacterized protein YjbR	yjbR	0.45432	31.2393	0.36265	26.6136	0.4673	31.8476	3.6609	78.5449		3	3	3	6	3	3	3	6	55.9	13.519	108030000	75612000	32415000	190880000	138610000	52275000	166240000	126540000	39701000	2267100000	493310000	1773800000
sp|P0AF52|GHXP_ECOLI Guanine/hypoxanthine permease GhxP OS=Escherichia coli (strain K12) OX=83333 GN=ghxP PE=1 SV=1	P0AF52	Guanine/hypoxanthine permease GhxP	ghxP	0.39387	28.2573			0.48933	32.8557				2	3	2	2	2	3	2	2	12.5	45.711	552770000	392920000	159840000	766760000	709220000	57540000	589290000	390890000	198400000	187000000	31211000	155790000
sp|P0AF67|TSAE_ECOLI tRNA threonylcarbamoyladenosine biosynthesis protein TsaE OS=Escherichia coli (strain K12) OX=83333 GN=tsaE PE=1 SV=1	P0AF67	tRNA threonylcarbamoyladenosine biosynthesis protein TsaE	tsaE							2.5358	71.7179					5	0	1	0	5	32.7	16.853	0	0	0	0	0	0	0	0	0	427120000	107850000	319270000
sp|P0AF70|YJEI_ECOLI Uncharacterized protein YjeI OS=Escherichia coli (strain K12) OX=83333 GN=yjeI PE=3 SV=1	P0AF70	Uncharacterized protein YjeI	yjeI	0.36944	26.9775	0.36725	26.8605	0.36385	26.6782	2.8828	74.2454		3	3	3	3	3	3	3	3	36.8	11.958	1200100000	863700000	336360000	1292400000	926210000	366150000	1525500000	1076600000	448890000	650310000	186650000	463660000
sp|P0AF93|RIDA_ECOLI 2-iminobutanoate/2-iminopropanoate deaminase OS=Escherichia coli (strain K12) OX=83333 GN=ridA PE=1 SV=2	P0AF93	2-iminobutanoate/2-iminopropanoate deaminase	ridA	0.38241	27.6626	0.54313	35.1966	0.53034	34.655	2.2632	69.3552		6	4	5	6	6	4	5	6	80.5	13.611	2339200000	1616300000	722930000	3671100000	2644400000	1026700000	2595900000	1729600000	866290000	10811000000	2640800000	8169800000
sp|P0AF96|TABA_ECOLI Toxin-antitoxin biofilm protein TabA OS=Escherichia coli (strain K12) OX=83333 GN=tabA PE=1 SV=1	P0AF96	Toxin-antitoxin biofilm protein TabA	tabA							3.0677	75.4161		2	3	3	4	2	3	3	4	44	16.865	42731000	42731000	0	142390000	97935000	44459000	46921000	46921000	0	664350000	166910000	497430000
sp|P0AF98|LPTF_ECOLI Lipopolysaccharide export system permease protein LptF OS=Escherichia coli (strain K12) OX=83333 GN=lptF PE=1 SV=1	P0AF98	Lipopolysaccharide export system permease protein LptF	lptF			0.45875	31.4482	0.45147	31.1043				3	3	3		3	3	3	1	15.8	40.357	325030000	218020000	107010000	270540000	182860000	87682000	226260000	149070000	77190000	39164000	12732000	26432000
sp|P0AFA2|NARX_ECOLI Nitrate/nitrite sensor protein NarX OS=Escherichia coli (strain K12) OX=83333 GN=narX PE=1 SV=1	P0AFA2	Nitrate/nitrite sensor protein NarX	narX										2		2		2	0	2	0	6.2	67.083	0	0	0	0	0	0	233830000	163110000	70723000	0	0	0
sp|P0AFA7|NHAB_ECOLI Na(+)/H(+) antiporter NhaB OS=Escherichia coli (strain K12) OX=83333 GN=nhaB PE=1 SV=1;sp|C4ZTM7|NHAB_ECOBW Na(+)/H(+) antiporter NhaB OS=Escherichia coli (strain K12 / MC4100 / BW2952) OX=595496 GN=nhaB PE=3 SV=1;sp|B1XA73|NHAB_ECODH	P0AFA7	Na(+)/H(+) antiporter NhaB	nhaB					0.35811	26.3683				5		5		5	1	5	1	11.7	56.728	92135000	24092000	68043000	0	0	0	202580000	142280000	60302000	48681000	0	48681000
sp|P0AFB1|NLPI_ECOLI Lipoprotein NlpI OS=Escherichia coli (strain K12) OX=83333 GN=nlpI PE=1 SV=1;sp|C4ZSQ4|NLPI_ECOBW Lipoprotein NlpI OS=Escherichia coli (strain K12 / MC4100 / BW2952) OX=595496 GN=nlpI PE=2 SV=1;sp|B1XGX5|NLPI_ECODH Lipoprotein NlpI OS=	P0AFB1	Lipoprotein NlpI	nlpI	0.38377	27.7337	0.45325	31.1887	0.44784	30.9316				4	5	6	2	4	5	6	2	37.1	33.62	482870000	327920000	154940000	446020000	305310000	140710000	382350000	262410000	119940000	182930000	54431000	128500000
sp|P0AFB5|NTRB_ECOLI Sensory histidine kinase/phosphatase NtrB OS=Escherichia coli (strain K12) OX=83333 GN=glnL PE=1 SV=1	P0AFB5	Nitrogen regulation protein NR(II)	glnL	0.59751	37.4026								8	7	10	3	8	7	10	3	45.3	38.556	198120000	119400000	78728000	130360000	55980000	74380000	77963000	44626000	33336000	57465000	17144000	40321000
sp|P0AFB8|NTRC_ECOLI DNA-binding transcriptional regulator NtrC OS=Escherichia coli (strain K12) OX=83333 GN=glnG PE=1 SV=1	P0AFB8	Nitrogen regulation protein NR(I)	glnG	0.6555	39.5953	0.74903	42.8255	0.77459	43.649	2.1613	68.3674		15	15	18	8	15	15	18	8	48.8	52.254	1496600000	941830000	554750000	454420000	172570000	281850000	549680000	292400000	257280000	208080000	70280000	137800000
sp|P0AFC3|NUOA_ECOLI NADH-quinone oxidoreductase subunit A OS=Escherichia coli (strain K12) OX=83333 GN=nuoA PE=3 SV=1;sp|B1X900|NUOA_ECODH NADH-quinone oxidoreductase subunit A OS=Escherichia coli (strain K12 / DH10B) OX=316385 GN=nuoA PE=3 SV=1	P0AFC3	NADH-quinone oxidoreductase subunit A	nuoA										4	3	4	2	4	3	4	2	20.4	16.457	0	0	0	0	0	0	0	0	0	0	0	0
sp|P0AFC7|NUOB_ECOLI NADH-quinone oxidoreductase subunit B OS=Escherichia coli (strain K12) OX=83333 GN=nuoB PE=1 SV=1;sp|C4ZUD0|NUOB_ECOBW NADH-quinone oxidoreductase subunit B OS=Escherichia coli (strain K12 / MC4100 / BW2952) OX=595496 GN=nuoB PE=3 SV=1	P0AFC7	NADH-quinone oxidoreductase subunit B	nuoB	0.51021	33.784	0.54177	35.1395	0.57721	36.5969	1.3494	57.4359		9	8	9	6	9	8	9	6	40.5	25.056	2606700000	1871100000	735650000	2771700000	1887400000	884340000	2600800000	1640900000	959900000	335540000	145370000	190170000
sp|P0AFD1|NUOE_ECOLI NADH-quinone oxidoreductase subunit E OS=Escherichia coli (strain K12) OX=83333 GN=nuoE PE=1 SV=1	P0AFD1	NADH-quinone oxidoreductase subunit E	nuoE										2	2	2		2	2	2	1	23.5	18.59	121780000	121780000	0	247090000	247090000	0	132260000	132260000	0	0	0	0
sp|P0AFD6|NUOI_ECOLI NADH-quinone oxidoreductase subunit I OS=Escherichia coli (strain K12) OX=83333 GN=nuoI PE=1 SV=1	P0AFD6	NADH-quinone oxidoreductase subunit I	nuoI			0.51051	33.7972	0.51295	33.904				7	8	9	2	7	8	9	2	55.6	20.538	507470000	347410000	160060000	1401400000	1100200000	301140000	1801500000	1478700000	322790000	42103000	0	42103000
sp|P0AFF2|NUPC_ECOLI Nucleoside permease NupC OS=Escherichia coli (strain K12) OX=83333 GN=nupC PE=1 SV=1	P0AFF2	Nucleoside permease NupC	nupC	0.39229	28.1759	0.40728	28.9409						4	3	2		4	3	2	0	12	43.475	877610000	665250000	212360000	822100000	591700000	230400000	870990000	628680000	242310000	0	0	0
sp|P0AFF6|NUSA_ECOLI Transcription termination/antitermination protein NusA OS=Escherichia coli (strain K12) OX=83333 GN=nusA PE=1 SV=1	P0AFF6	Transcription termination/antitermination protein NusA	nusA	0.41012	29.084	0.47139	32.0371	0.45999	31.5064	2.3949	70.5441		16	16	19	18	16	16	19	18	60	54.87	3360700000	2381700000	978950000	6474800000	4315600000	2159200000	3959800000	2992300000	967490000	3897200000	1139000000	2758200000
sp|P0AFG0|NUSG_ECOLI Transcription termination/antitermination protein NusG OS=Escherichia coli (strain K12) OX=83333 GN=nusG PE=1 SV=2	P0AFG0	Transcription termination/antitermination protein NusG	nusG	0.45221	31.1394	0.47651	32.2727	0.49279	33.0113	2.5507	71.8365		9	9	8	9	9	9	8	9	72.4	20.531	5368200000	3742300000	1625900000	5552200000	3800500000	1751700000	5684000000	3789300000	1894700000	6134300000	1679700000	4454600000
sp|P0AFG3|ODO1_ECOLI 2-oxoglutarate dehydrogenase E1 component OS=Escherichia coli (strain K12) OX=83333 GN=sucA PE=1 SV=1	P0AFG3	2-oxoglutarate dehydrogenase E1 component	sucA	0.31798	24.1263	0.35965	26.4517	0.37024	27.0201	1.8633	65.0753		43	36	35	29	43	36	35	29	59.3	105.06	25089000000	18918000000	6171600000	16597000000	12107000000	4490100000	16764000000	12368000000	4395500000	4388200000	1260900000	3127400000
sp|P0AFG6|ODO2_ECOLI Dihydrolipoyllysine-residue succinyltransferase component of 2-oxoglutarate dehydrogenase complex OS=Escherichia coli (strain K12) OX=83333 GN=sucB PE=1 SV=2	P0AFG6	Dihydrolipoyllysine-residue succinyltransferase component of 2-oxoglutarate dehydrogenase complex	sucB	0.30054	23.1089	0.31828	24.1436	0.32421	24.4833	1.608	61.6564		25	22	25	20	25	22	25	20	68.1	44.011	20002000000	15594000000	4408700000	21494000000	15945000000	5548900000	18504000000	13795000000	4709500000	9352900000	3522500000	5830300000
sp|P0AFG8|ODP1_ECOLI Pyruvate dehydrogenase E1 component OS=Escherichia coli (strain K12) OX=83333 GN=aceE PE=1 SV=2	P0AFG8	Pyruvate dehydrogenase E1 component	aceE	0.42551	29.8497	0.46565	31.7709	0.46111	31.5589	2.6523	72.62		62	57	60	60	62	57	60	60	72.7	99.667	52872000000	35780000000	17092000000	57755000000	38626000000	19130000000	68597000000	44221000000	24376000000	52782000000	14264000000	38517000000
sp|P0AFH0|OGT_ECOLI Methylated-DNA--protein-cysteine methyltransferase OS=Escherichia coli (strain K12) OX=83333 GN=ogt PE=1 SV=1	P0AFH0	Methylated-DNA--protein-cysteine methyltransferase	ogt												2		0	1	2	0	26.3	19.179	0	0	0	0	0	0	0	0	0	0	0	0
sp|P0AFH2|OPPB_ECOLI Oligopeptide transport system permease protein OppB OS=Escherichia coli (strain K12) OX=83333 GN=oppB PE=1 SV=1	P0AFH2	Oligopeptide transport system permease protein OppB	oppB	0.56595	36.141	0.58641	36.9646	0.63354	38.7833				3	4	3		3	4	3	1	19	33.443	830480000	602650000	227830000	681080000	239080000	441990000	645450000	296250000	349200000	46037000	14208000	31829000
sp|P0AFH6|OPPC_ECOLI Oligopeptide transport system permease protein OppC OS=Escherichia coli (strain K12) OX=83333 GN=oppC PE=1 SV=1	P0AFH6	Oligopeptide transport system permease protein OppC	oppC	0.48721	32.76	0.53428	34.8228	0.60356	37.6388				3	2	3		3	2	3	0	7.3	33.022	461100000	300520000	160590000	311840000	198840000	113000000	411680000	260060000	151620000	0	0	0
sp|P0AFH8|OSMY_ECOLI Osmotically-inducible protein Y OS=Escherichia coli (strain K12) OX=83333 GN=osmY PE=1 SV=1	P0AFH8	Osmotically-inducible protein Y	osmY	1.5405	60.6377	1.5841	61.3018	1.5349	60.5507	3.2268	76.3414		8	8	8	8	8	8	8	8	53.2	21.073	33313000000	12658000000	20655000000	29849000000	11226000000	18623000000	31755000000	12328000000	19427000000	31996000000	7366200000	24630000000
sp|P0AFI2|PARC_ECOLI DNA topoisomerase 4 subunit A OS=Escherichia coli (strain K12) OX=83333 GN=parC PE=1 SV=1	P0AFI2	DNA topoisomerase 4 subunit A	parC	0.48975	32.8746	0.53963	35.0493	0.54171	35.137	2.6247	72.4115		13	11	9	9	13	11	9	9	30.6	83.83	1063700000	734700000	329030000	738230000	501240000	236990000	444890000	346290000	98604000	230490000	71272000	159210000
sp|P0AFI5|PBP7_ECOLI D-alanyl-D-alanine endopeptidase OS=Escherichia coli (strain K12) OX=83333 GN=pbpG PE=1 SV=2	P0AFI5	D-alanyl-D-alanine endopeptidase	pbpG	0.6162	38.1265	0.76591	43.372	0.7697	43.4932				6	4	5		6	4	5	1	44.2	33.887	273070000	171600000	101470000	171740000	106850000	64898000	162480000	112420000	50056000	0	0	0
sp|P0AFI7|PDXH_ECOLI Pyridoxine/pyridoxamine 5-phosphate oxidase OS=Escherichia coli (strain K12) OX=83333 GN=pdxH PE=1 SV=2;sp|C4ZYA1|PDXH_ECOBW Pyridoxine/pyridoxamine 5-phosphate oxidase OS=Escherichia coli (strain K12 / MC4100 / BW2952) OX=595496 GN=	P0AFI7	Pyridoxine/pyridoxamine 5-phosphate oxidase	pdxH							2.4081	70.6581		6	4	4	11	6	4	4	11	59.6	25.545	100540000	80876000	19664000	0	0	0	0	0	0	261110000	45798000	215310000
sp|P0AFI9|PERM_ECOLI Putative permease PerM OS=Escherichia coli (strain K12) OX=83333 GN=perM PE=3 SV=1	P0AFI9	Putative permease PerM	perM												2		1	1	2	1	12.2	39.194	0	0	0	0	0	0	0	0	0	0	0	0
sp|P0AFJ1|PHNA_ECOLI Protein PhnA OS=Escherichia coli (strain K12) OX=83333 GN=phnA PE=4 SV=1	P0AFJ1	Protein PhnA	phnA							1.9255	65.8178					2	1	1	1	2	22.5	12.345	109500000	73980000	35523000	33802000	0	33802000	36433000	0	36433000	409540000	155660000	253880000
sp|P0AFJ5|PHOB_ECOLI Phosphate regulon transcriptional regulatory protein PhoB OS=Escherichia coli (strain K12) OX=83333 GN=phoB PE=1 SV=1	P0AFJ5	Phosphate regulon transcriptional regulatory protein PhoB	phoB										3	2	3		3	2	3	1	25.8	26.433	230180000	121390000	108790000	203450000	98911000	104540000	222740000	104280000	118460000	109430000	31592000	77838000
sp|P0AFJ7|PITA_ECOLI Low-affinity inorganic phosphate transporter 1 OS=Escherichia coli (strain K12) OX=83333 GN=pitA PE=1 SV=1	P0AFJ7	Low-affinity inorganic phosphate transporter 1	pitA	0.4684	31.8987	0.59447	37.2832	0.52804	34.5567	2.3179	69.8605		4	5	4	4	4	5	4	4	15.4	53.388	1547900000	986840000	561080000	2464000000	1546200000	917850000	1968000000	1237800000	730230000	353300000	98229000	255070000
sp|P0AFK0|PMBA_ECOLI Metalloprotease PmbA OS=Escherichia coli (strain K12) OX=83333 GN=pmbA PE=1 SV=1	P0AFK0	Metalloprotease PmbA	pmbA	0.47242	32.0846	0.52286	34.3341	0.51412	33.955	2.8317	73.9019		18	16	16	15	18	16	16	15	58	48.369	6040400000	4027300000	2013100000	3510000000	2275500000	1234600000	3539400000	2341800000	1197600000	2415200000	670680000	1744600000
sp|P0AFK4|POTB_ECOLI Spermidine/putrescine transport system permease protein PotB OS=Escherichia coli (strain K12) OX=83333 GN=potB PE=1 SV=1	P0AFK4	Spermidine/putrescine transport system permease protein PotB	potB											2			0	2	1	0	5.8	31.062	0	0	0	64639000	48799000	15839000	39800000	29265000	10535000	0	0	0
sp|P0AFK9|POTD_ECOLI Spermidine/putrescine-binding periplasmic protein OS=Escherichia coli (strain K12) OX=83333 GN=potD PE=1 SV=1	P0AFK9	Spermidine/putrescine-binding periplasmic protein	potD	0.37247	27.1387	0.41294	29.2256	0.42049	29.6018	2.758	73.3901		17	17	16	16	17	17	16	16	57.2	38.867	10108000000	7139500000	2968900000	11992000000	8414800000	3576900000	12439000000	8721400000	3717700000	17619000000	4296900000	13322000000
sp|P0AFL3|PPIA_ECOLI Peptidyl-prolyl cis-trans isomerase A OS=Escherichia coli (strain K12) OX=83333 GN=ppiA PE=1 SV=1	P0AFL3	Peptidyl-prolyl cis-trans isomerase A	ppiA	0.40823	28.9889	0.46008	31.5106	0.44923	30.9978	2.1059	67.8032		3	3	4	3	3	3	4	3	47.9	20.431	1469600000	1047900000	421740000	993050000	805850000	187200000	1035100000	866110000	168970000	1350200000	170970000	1179200000
sp|P0AFL6|PPX_ECOLI Exopolyphosphatase OS=Escherichia coli (strain K12) OX=83333 GN=ppx PE=1 SV=2	P0AFL6	Exopolyphosphatase	ppx										2	4	3	5	2	4	3	5	20.3	58.135	0	0	0	48744000	29447000	19297000	77025000	48863000	28162000	157730000	46276000	111460000
sp|P0AFM2|PROX_ECOLI Glycine betaine/proline betaine-binding periplasmic protein OS=Escherichia coli (strain K12) OX=83333 GN=proX PE=1 SV=1	P0AFM2	Glycine betaine-binding periplasmic protein	proX	0.13528	11.916	0.19737	16.4836	0.18157	15.3668	2.2542	69.2705		4	7	7	6	4	7	7	6	43.3	36.022	1249300000	1124100000	125160000	1155500000	1096800000	58718000	1449600000	1320100000	129480000	3406800000	1218000000	2188700000
sp|P0AFM4|PSIF_ECOLI Phosphate starvation-inducible protein PsiF OS=Escherichia coli (strain K12) OX=83333 GN=psiF PE=1 SV=1	P0AFM4	Phosphate starvation-inducible protein PsiF	psiF										2	2			2	2	1	1	24.5	11.686	277830000	256240000	21589000	261530000	242040000	19484000	88778000	52570000	36208000	208090000	49215000	158870000
sp|P0AFM6|PSPA_ECOLI Phage shock protein A OS=Escherichia coli (strain K12) OX=83333 GN=pspA PE=1 SV=2	P0AFM6	Phage shock protein A	pspA	1.2707	55.9607	1.2923	56.3757	1.2678	55.9044	3.3143	76.8213		16	17	19	8	16	17	19	8	67.1	25.493	26517000000	11449000000	15069000000	28076000000	11487000000	16589000000	30929000000	13194000000	17735000000	1175800000	233740000	942070000
sp|P0AFM9|PSPB_ECOLI Phage shock protein B OS=Escherichia coli (strain K12) OX=83333 GN=pspB PE=1 SV=1	P0AFM9	Phage shock protein B	pspB										2	2	2		2	2	2	1	36.5	8.763	270830000	130850000	139970000	288570000	136600000	151970000	269220000	0	269220000	0	0	0
sp|P0AFN2|PSPC_ECOLI Phage shock protein C OS=Escherichia coli (strain K12) OX=83333 GN=pspC PE=1 SV=1	P0AFN2	Phage shock protein C	pspC										3	3	2		3	3	2	0	21	13.517	0	0	0	0	0	0	0	0	0	0	0	0
sp|P0AFP4|YBBO_ECOLI Uncharacterized oxidoreductase YbbO OS=Escherichia coli (strain K12) OX=83333 GN=ybbO PE=3 SV=1	P0AFP4	Uncharacterized oxidoreductase YbbO	ybbO	0.57941	36.6852	0.34591	25.7008	0.34675	25.7472				6	4	6	3	6	4	6	3	36.4	29.41	859210000	461060000	398150000	600700000	440540000	160160000	522350000	395430000	126920000	221720000	62089000	159630000
sp|P0AFP6|GCH1L_ECOLI GTP cyclohydrolase 1 type 2 homolog OS=Escherichia coli (strain K12) OX=83333 GN=ybgI PE=1 SV=1	P0AFP6	Putative GTP cyclohydrolase 1 type 2	ybgI	0.53758	34.9627	0.77943	43.8022	0.54561	35.3006	3.3399	76.958		6	6	6	6	6	6	6	6	52.2	26.892	1284000000	753890000	530120000	1413900000	802630000	611320000	1614600000	950760000	663810000	3547000000	822020000	2725000000
sp|P0AFP9|YBHR_ECOLI Probable multidrug ABC transporter permease YbhR OS=Escherichia coli (strain K12) OX=83333 GN=ybhR PE=1 SV=1	P0AFP9	Inner membrane transport permease YbhR	ybhR	0.38082	27.5793	0.45655	31.3446						2	3	2		2	3	2	0	12.8	41.565	141470000	98905000	42569000	181580000	115280000	66302000	115830000	87847000	27986000	0	0	0
sp|P0AFQ7|YCFH_ECOLI Uncharacterized metal-dependent hydrolase YcfH OS=Escherichia coli (strain K12) OX=83333 GN=ycfH PE=1 SV=1	P0AFQ7	Uncharacterized deoxyribonuclease YcfH	ycfH										3	3	3	3	3	3	3	3	31.3	29.808	128790000	128790000	0	51853000	51853000	0	140570000	96538000	44033000	287450000	31698000	255750000
sp|P0AFR0|RSSA_ECOLI NTE family protein RssA OS=Escherichia coli (strain K12) OX=83333 GN=rssA PE=3 SV=2	P0AFR0	NTE family protein RssA	rssA										2			2	2	0	1	2	19.3	33.067	48740000	48740000	0	0	0	0	0	0	0	0	0	0
sp|P0AFR2|DAUA_ECOLI C4-dicarboxylic acid transporter DauA OS=Escherichia coli (strain K12) OX=83333 GN=dauA PE=1 SV=2	P0AFR2	C4-dicarboxylic acid transporter DauA	dauA											2	2		1	2	2	0	4.5	59.428	0	0	0	0	0	0	0	0	0	0	0	0
sp|P0AFR4|YCIO_ECOLI Uncharacterized protein YciO OS=Escherichia coli (strain K12) OX=83333 GN=yciO PE=1 SV=1	P0AFR4	Uncharacterized protein YciO	yciO	0.51901	34.1676	0.59415	37.2706	0.58475	36.8986	3.061	75.3755		7	7	6	7	7	7	6	7	74.8	23.211	701930000	367890000	334040000	429580000	227420000	202150000	453070000	244450000	208620000	1412900000	283290000	1129600000
sp|P0AFS3|FOLM_ECOLI Dihydromonapterin reductase OS=Escherichia coli (strain K12) OX=83333 GN=folM PE=1 SV=1	P0AFS3	Dihydrofolate reductase FolM	folM													2	0	0	0	2	16.7	26.348	0	0	0	0	0	0	0	0	0	151140000	40838000	110310000
sp|P0AFS7|YDIK_ECOLI Putative transport protein YdiK OS=Escherichia coli (strain K12) OX=83333 GN=ydiK PE=1 SV=1	P0AFS7	UPF0118 inner membrane protein YdiK	ydiK										2		2		2	1	2	1	11.6	39.841	238010000	0	238010000	624030000	333050000	290980000	329860000	176080000	153780000	50084000	0	50084000
sp|P0AFT2|YECS_ECOLI L-cystine transport system permease protein YecS OS=Escherichia coli (strain K12) OX=83333 GN=yecS PE=1 SV=1	P0AFT2	Inner membrane amino-acid ABC transporter permease protein YecS	yecS										3	2	2		3	2	2	1	21.6	24.801	1320600000	880310000	440280000	1603500000	1048300000	555200000	1301600000	867670000	433910000	565390000	125670000	439720000
sp|P0AFU4|GLRR_ECOLI Transcriptional regulatory protein GlrR OS=Escherichia coli (strain K12) OX=83333 GN=glrR PE=1 SV=1	P0AFU4	Transcriptional regulatory protein GlrR	glrR										2	2		2	2	2	1	2	18.2	49.148	25398000	25398000	0	8510400	8510400	0	0	0	0	0	0	0
sp|P0AFU8|RISA_ECOLI Riboflavin synthase OS=Escherichia coli (strain K12) OX=83333 GN=ribC PE=1 SV=1	P0AFU8	Riboflavin synthase	ribC	0.4611	31.5584	0.5286	34.5807			3.2953	76.7187		5	7	5	10	5	7	5	10	67.1	23.445	173560000	121320000	52242000	310670000	239590000	71087000	325210000	273320000	51895000	1461600000	263640000	1197900000
sp|P0AFW0|RFAH_ECOLI Transcription antitermination protein RfaH OS=Escherichia coli (strain K12) OX=83333 GN=rfaH PE=1 SV=1	P0AFW0	Transcription antitermination protein RfaH	rfaH	0.50693	33.6399	0.6038	37.6481	0.5717	36.3746				4	4	5	2	4	4	5	2	36.4	18.34	535670000	354040000	181630000	397830000	246190000	151640000	439220000	291180000	148040000	89072000	7744900	81327000
sp|P0AFW2|RMF_ECOLI Ribosome modulation factor OS=Escherichia coli (strain K12) OX=83333 GN=rmf PE=1 SV=1	P0AFW2	Ribosome modulation factor	rmf													5	0	1	1	5	76.4	6.5074	0	0	0	0	0	0	0	0	0	0	0	0
sp|P0AFX0|HPF_ECOLI Ribosome hibernation promoting factor OS=Escherichia coli (strain K12) OX=83333 GN=hpf PE=1 SV=1	P0AFX0	Ribosome hibernation promoting factor	hpf			0.59702	37.3834	0.53471	34.8411	3.8035	79.1818			3	2	5	1	3	2	5	77.9	10.75	88770000	62083000	26687000	336290000	242080000	94211000	485520000	269520000	216000000	7230900000	1669200000	5561600000
sp|P0AFX7|RSEA_ECOLI Anti-sigma-E factor RseA OS=Escherichia coli (strain K12) OX=83333 GN=rseA PE=1 SV=1	P0AFX7	Anti-sigma-E factor RseA	rseA										3	4	4	4	3	4	4	4	49.5	24.321	344960000	0	344960000	352790000	71770000	281020000	293070000	18232000	274830000	199890000	33347000	166540000
sp|P0AFX9|RSEB_ECOLI Sigma-E factor regulatory protein RseB OS=Escherichia coli (strain K12) OX=83333 GN=rseB PE=1 SV=1	P0AFX9	Sigma-E factor regulatory protein RseB	rseB										7	6	8	3	7	6	8	3	44.3	35.749	270030000	197170000	72853000	363260000	283320000	79944000	265700000	201370000	64335000	245850000	58173000	187670000
sp|P0AFY8|SEQA_ECOLI Negative modulator of initiation of replication OS=Escherichia coli (strain K12) OX=83333 GN=seqA PE=1 SV=1	P0AFY8	Negative modulator of initiation of replication	seqA	0.38372	27.731			0.44117	30.6119	2.422	70.7773		4	3	3	6	4	3	3	6	39.2	20.315	639020000	401050000	237970000	562310000	468880000	93426000	799710000	550060000	249650000	1251300000	354140000	897150000
sp|P0AFZ3|SSPB_ECOLI Stringent starvation protein B OS=Escherichia coli (strain K12) OX=83333 GN=sspB PE=1 SV=1	P0AFZ3	Stringent starvation protein B	sspB													3	0	1	1	3	21.2	18.262	0	0	0	0	0	0	0	0	0	0	0	0
sp|P0AG00|WZZE_ECOLI ECA polysaccharide chain length modulation protein OS=Escherichia coli (strain K12) OX=83333 GN=wzzE PE=1 SV=2	P0AG00	Lipopolysaccharide biosynthesis protein WzzE	wzzE					0.69716	41.078				9	10	10	3	9	10	10	3	50	39.489	369130000	208410000	160720000	776130000	451270000	324850000	868140000	529900000	338250000	178940000	47770000	131170000
sp|P0AG07|RPE_ECOLI Ribulose-phosphate 3-epimerase OS=Escherichia coli (strain K12) OX=83333 GN=rpe PE=1 SV=1	P0AG07	Ribulose-phosphate 3-epimerase	rpe	0.49375	33.0544	0.44654	30.8695	0.44645	30.8652	2.7339	73.2184		7	5	7	9	7	5	7	9	60.4	24.554	2010700000	1387100000	623530000	2483500000	1650000000	833480000	1608300000	799130000	809200000	7128100000	1851000000	5277100000
sp|P0AG14|SOHB_ECOLI Probable protease SohB OS=Escherichia coli (strain K12) OX=83333 GN=sohB PE=1 SV=1	P0AG14	Probable protease SohB	sohB	0.42182	29.6676	0.45461	31.2531	0.43532	30.3291	2.7322	73.2062		12	11	13	9	12	11	13	9	52.1	39.366	5185000000	3673700000	1511300000	4799400000	3327500000	1471900000	5133800000	4087000000	1046800000	1237200000	241720000	995490000
sp|P0AG16|PUR1_ECOLI Amidophosphoribosyltransferase OS=Escherichia coli (strain K12) OX=83333 GN=purF PE=1 SV=2	P0AG16	Amidophosphoribosyltransferase	purF	0.44165	30.635			0.49981	33.3249	2.2724	69.4414		6	6	7	8	6	6	7	8	25.5	56.487	189500000	128660000	60841000	188330000	123300000	65032000	266160000	158220000	107940000	245890000	83655000	162240000
sp|P0AG18|PURE_ECOLI N5-carboxyaminoimidazole ribonucleotide mutase OS=Escherichia coli (strain K12) OX=83333 GN=purE PE=1 SV=2	P0AG18	N5-carboxyaminoimidazole ribonucleotide mutase	purE	0.38726	27.9155	0.44089	30.5984	0.46672	31.8207	2.4467	70.9867		5	5	5	6	5	5	5	6	49.1	17.78	683770000	446830000	236950000	819800000	524600000	295200000	611510000	387130000	224380000	1153100000	300230000	852910000
sp|P0AG20|RELA_ECOLI GTP pyrophosphokinase OS=Escherichia coli (strain K12) OX=83333 GN=relA PE=1 SV=1	P0AG20	GTP pyrophosphokinase	relA	0.44291	30.6956	0.50118	33.3857	0.49747	33.2207	1.2825	56.1884		16	13	16	6	16	13	16	6	41.1	83.875	486900000	353640000	133260000	337050000	259620000	77426000	437740000	299810000	137930000	114770000	41449000	73325000
sp|P0AG24|SPOT_ECOLI Bifunctional (p)ppGpp synthase/hydrolase SpoT OS=Escherichia coli (strain K12) OX=83333 GN=spoT PE=1 SV=1	P0AG24	Bifunctional (p)ppGpp synthase/hydrolase SpoT;GTP pyrophosphokinase;Guanosine-3,5-bis(diphosphate) 3-pyrophosphohydrolase	spoT	0.34946	25.8963	0.42666	29.9062	0.39245	28.1841	3.2653	76.555		10	8	12	6	10	8	12	6	26.9	79.342	528760000	376290000	152470000	505600000	387980000	117620000	597240000	418840000	178400000	120790000	30354000	90433000
sp|P0AG27|YIBN_ECOLI Uncharacterized protein YibN OS=Escherichia coli (strain K12) OX=83333 GN=yibN PE=1 SV=1	P0AG27	Uncharacterized protein YibN	yibN	0.38766	27.9362	0.43052	30.0953	0.44604	30.8456	2.4001	70.5891		5	7	7	3	5	7	7	3	59.4	15.596	3688100000	2695700000	992360000	3948000000	2727700000	1220300000	3573900000	2404900000	1169000000	946860000	268200000	678660000
sp|P0AG30|RHO_ECOLI Transcription termination factor Rho OS=Escherichia coli (strain K12) OX=83333 GN=rho PE=1 SV=1	P0AG30	Transcription termination factor Rho	rho	0.38105	27.5913	0.41937	29.5462	0.43439	30.284	2.3844	70.4527		32	30	30	28	32	30	30	28	75.2	47.004	24315000000	17569000000	6746100000	17652000000	12214000000	5437600000	20216000000	14153000000	6062000000	11334000000	2899300000	8435100000
sp|P0AG40|RIBF_ECOLI Bifunctional riboflavin kinase/FMN adenylyltransferase OS=Escherichia coli (strain K12) OX=83333 GN=ribF PE=1 SV=1	P0AG40	Riboflavin biosynthesis protein RibF;Riboflavin kinase;FMN adenylyltransferase	ribF												2		0	0	2	1	6.7	34.734	0	0	0	0	0	0	19571000	19571000	0	23420000	0	23420000
sp|P0AG44|RL17_ECOLI 50S ribosomal protein L17 OS=Escherichia coli (strain K12) OX=83333 GN=rplQ PE=1 SV=1;sp|C4ZUE9|RL17_ECOBW 50S ribosomal protein L17 OS=Escherichia coli (strain K12 / MC4100 / BW2952) OX=595496 GN=rplQ PE=3 SV=1;sp|B1X6E6|RL17_ECODH 50	P0AG44	50S ribosomal protein L17	rplQ	0.45062	31.064	0.49099	32.9305	0.51221	33.8716	2.3582	70.2221		10	11	11	11	10	11	11	11	63	14.364	15442000000	10307000000	5135200000	16188000000	10414000000	5774400000	13527000000	8862700000	4664500000	10485000000	2901700000	7583700000
sp|P0AG48|RL21_ECOLI 50S ribosomal protein L21 OS=Escherichia coli (strain K12) OX=83333 GN=rplU PE=1 SV=1;sp|C4ZSS5|RL21_ECOBW 50S ribosomal protein L21 OS=Escherichia coli (strain K12 / MC4100 / BW2952) OX=595496 GN=rplU PE=3 SV=1;sp|B1XHG2|RL21_ECODH 50	P0AG48	50S ribosomal protein L21	rplU	0.43985	30.5483	0.50314	33.4726	0.49879	33.2795	2.2479	69.2109		7	7	7	6	7	7	7	6	69.9	11.564	25165000000	16769000000	8396300000	28372000000	18297000000	10075000000	33619000000	21690000000	11930000000	19896000000	5792400000	14104000000
sp|P0AG51|RL30_ECOLI 50S ribosomal protein L30 OS=Escherichia coli (strain K12) OX=83333 GN=rpmD PE=1 SV=2;sp|C4ZUF7|RL30_ECOBW 50S ribosomal protein L30 OS=Escherichia coli (strain K12 / MC4100 / BW2952) OX=595496 GN=rpmD PE=3 SV=1;sp|B1X6F4|RL30_ECODH 50	P0AG51	50S ribosomal protein L30	rpmD	0.4519	31.1247	0.46104	31.5556	0.53435	34.8258	2.3658	70.2894		7	7	8	8	7	7	8	8	89.8	6.5417	1872700000	1271100000	601590000	2298900000	1549700000	749230000	3041000000	2034300000	1006700000	5810800000	1615100000	4195700000
sp|P0AG55|RL6_ECOLI 50S ribosomal protein L6 OS=Escherichia coli (strain K12) OX=83333 GN=rplF PE=1 SV=2;sp|C4ZUG0|RL6_ECOBW 50S ribosomal protein L6 OS=Escherichia coli (strain K12 / MC4100 / BW2952) OX=595496 GN=rplF PE=3 SV=1;sp|B1X6F7|RL6_ECODH 50S rib	P0AG55	50S ribosomal protein L6	rplF	0.44022	30.5662	0.48567	32.6903	0.51649	34.0583	2.2058	68.8065		16	16	18	19	16	16	18	19	89.3	18.904	35725000000	23768000000	11957000000	30696000000	19406000000	11290000000	40242000000	25478000000	14764000000	30700000000	9378300000	21322000000
sp|P0AG59|RS14_ECOLI 30S ribosomal protein S14 OS=Escherichia coli (strain K12) OX=83333 GN=rpsN PE=1 SV=2;sp|B1X6F9|RS14_ECODH 30S ribosomal protein S14 OS=Escherichia coli (strain K12 / DH10B) OX=316385 GN=rpsN PE=3 SV=1	P0AG59	30S ribosomal protein S14	rpsN	0.48565	32.6894	0.53606	34.8984	0.52566	34.4546	2.282	69.5308		8	9	8	6	8	9	8	6	66.3	11.58	3565100000	2378200000	1186900000	5376300000	3440300000	1936000000	8432800000	5338400000	3094400000	8337900000	2414000000	5923900000
sp|P0AG63|RS17_ECOLI 30S ribosomal protein S17 OS=Escherichia coli (strain K12) OX=83333 GN=rpsQ PE=1 SV=2;sp|C4ZUG6|RS17_ECOBW 30S ribosomal protein S17 OS=Escherichia coli (strain K12 / MC4100 / BW2952) OX=595496 GN=rpsQ PE=3 SV=1;sp|B1X6G3|RS17_ECODH 30	P0AG63	30S ribosomal protein S17	rpsQ										2	2	2	5	2	2	2	5	31	9.7043	0	0	0	0	0	0	0	0	0	153490000	24994000	128490000
sp|P0AG67|RS1_ECOLI 30S ribosomal protein S1 OS=Escherichia coli (strain K12) OX=83333 GN=rpsA PE=1 SV=1	P0AG67	30S ribosomal protein S1	rpsA	0.45329	31.1906	0.50704	33.6448	0.52197	34.2957	2.2884	69.5901		37	35	36	32	37	35	36	32	67.5	61.157	95118000000	62688000000	32429000000	84549000000	53993000000	30556000000	87193000000	55717000000	31476000000	50688000000	13877000000	36811000000
sp|P0AG76|SBCD_ECOLI Nuclease SbcCD subunit D OS=Escherichia coli (strain K12) OX=83333 GN=sbcD PE=1 SV=1	P0AG76	Nuclease SbcCD subunit D	sbcD	0.43837	30.4769								3				3	1	1	0	14.5	44.713	144720000	99337000	45384000	0	0	0	0	0	0	0	0	0
sp|P0AG78|SUBI_ECOLI Sulfate-binding protein OS=Escherichia coli (strain K12) OX=83333 GN=sbp PE=1 SV=1	P0AG78	Sulfate-binding protein	sbp	1.5104	60.1657	1.4595	59.3413	1.4704	59.5207	2.9844	74.9021		18	17	19	9	18	17	19	9	78.7	36.659	7104600000	2542700000	4561900000	6772400000	2338000000	4434400000	10325000000	3425300000	6899500000	1345200000	263180000	1082100000
sp|P0AG80|UGPB_ECOLI sn-glycerol-3-phosphate-binding periplasmic protein UgpB OS=Escherichia coli (strain K12) OX=83333 GN=ugpB PE=1 SV=1	P0AG80	sn-glycerol-3-phosphate-binding periplasmic protein UgpB	ugpB	0.84827	45.8954	0.64573	39.2367	0.6579	39.6827	3.0143	75.0891		11	16	13	14	11	16	13	14	62.1	48.448	514020000	307270000	206750000	912730000	548770000	363960000	814180000	518070000	296110000	1120700000	162030000	958700000
sp|P0AG82|PSTS_ECOLI Phosphate-binding protein PstS OS=Escherichia coli (strain K12) OX=83333 GN=pstS PE=1 SV=1	P0AG82	Phosphate-binding protein PstS	pstS	0.90028	47.3762	0.80387	44.5636	0.92386	48.0212	2.6308	72.4579		10	12	12	12	10	12	12	12	56.1	37.023	1629600000	915020000	714610000	2129300000	1103000000	1026300000	2200700000	1151100000	1049600000	1433200000	293300000	1139900000
sp|P0AG84|YGHA_ECOLI Uncharacterized oxidoreductase YghA OS=Escherichia coli (strain K12) OX=83333 GN=yghA PE=1 SV=1	P0AG84	Uncharacterized oxidoreductase YghA	yghA	1.6706	62.5552	1.5053	60.0846	1.5378	60.5958	3.6181	78.3461		7	9	9	9	7	9	9	9	55.1	31.488	2911200000	1522700000	1388500000	2355400000	930450000	1425000000	1831800000	715890000	1115900000	3056000000	653430000	2402600000
sp|P0AG86|SECB_ECOLI Protein-export protein SecB OS=Escherichia coli (strain K12) OX=83333 GN=secB PE=1 SV=1;sp|C4ZXK1|SECB_ECOBW Protein-export protein SecB OS=Escherichia coli (strain K12 / MC4100 / BW2952) OX=595496 GN=secB PE=3 SV=1;sp|B1X943|SECB_ECOD	P0AG86	Protein-export protein SecB	secB	0.3907	28.0938	0.39229	28.1759	0.38848	27.9788	2.6914	72.91		4	5	5	6	4	5	5	6	64.5	17.277	2079800000	1442200000	637590000	2833100000	1954400000	878660000	2730000000	1867400000	862520000	3575000000	1034500000	2540500000
sp|P0AG90|SECD_ECOLI Protein translocase subunit SecD OS=Escherichia coli (strain K12) OX=83333 GN=secD PE=1 SV=1	P0AG90	Protein translocase subunit SecD	secD	0.3339	25.0319	0.37557	27.3029	0.40068	28.6061	2.1018	67.7607		26	26	29	21	26	26	29	21	52.7	66.631	7277700000	5517200000	1760500000	6623900000	5061100000	1562800000	7071600000	5263600000	1808000000	1540100000	442350000	1097700000
sp|P0AG93|SECF_ECOLI Protein translocase subunit SecF OS=Escherichia coli (strain K12) OX=83333 GN=secF PE=1 SV=1	P0AG93	Protein translocase subunit SecF	secF	0.33667	25.1872	0.38089	27.5829	0.38758	27.9321	2.2285	69.0259		6	5	6	4	6	5	6	4	28.8	35.382	2033100000	1507500000	525600000	1780000000	1327400000	452670000	1815800000	1400600000	415150000	400830000	74149000	326680000
sp|P0AG99|SECG_ECOLI Protein-export membrane protein SecG OS=Escherichia coli (strain K12) OX=83333 GN=secG PE=1 SV=1	P0AG99	Protein-export membrane protein SecG	secG	0.4653	31.7546	0.52536	34.4417	0.55048	35.5038	2.7081	73.032		2	2	2	2	2	2	2	2	27.3	11.365	6705600000	4291300000	2414300000	7352400000	4513600000	2838800000	6840800000	4167700000	2673100000	3255000000	823660000	2431400000
sp|P0AGA2|SECY_ECOLI Protein translocase subunit SecY OS=Escherichia coli (strain K12) OX=83333 GN=secY PE=1 SV=1	P0AGA2	Protein translocase subunit SecY	secY	0.46774	31.868	0.53257	34.7501	0.53749	34.9589	2.6226	72.3955		6	6	7	3	6	6	7	3	11.3	48.511	10103000000	6412800000	3690500000	8755000000	5471000000	3284000000	9112800000	5503800000	3609000000	1706600000	441510000	1265100000
sp|P0AGB0|SERB_ECOLI Phosphoserine phosphatase OS=Escherichia coli (strain K12) OX=83333 GN=serB PE=1 SV=1	P0AGB0	Phosphoserine phosphatase	serB	0.41715	29.4358	0.43381	30.2558			2.3986	70.5761		2	3	4	5	2	3	4	5	24.8	35.042	367040000	253860000	113180000	276190000	209370000	66822000	224910000	177740000	47163000	667380000	174510000	492870000
sp|P0AGB6|RPOE_ECOLI ECF RNA polymerase sigma-E factor OS=Escherichia coli (strain K12) OX=83333 GN=rpoE PE=1 SV=1	P0AGB6	ECF RNA polymerase sigma-E factor	rpoE					0.44318	30.7086				4	7	4	3	4	7	4	3	47.6	21.695	53342000	37632000	15711000	89272000	69335000	19936000	769830000	541230000	228600000	259120000	0	259120000
sp|P0AGC3|SLT_ECOLI Soluble lytic murein transglycosylase OS=Escherichia coli (strain K12) OX=83333 GN=slt PE=1 SV=1	P0AGC3	Soluble lytic murein transglycosylase	slt			0.5152	34.0021	0.49218	32.984	2.82	73.822		7	9	8	11	7	9	8	11	35.7	73.352	283160000	186050000	97108000	583220000	347750000	235470000	546620000	373860000	172760000	1024500000	251050000	773450000
sp|P0AGD1|SODC_ECOLI Superoxide dismutase [Cu-Zn] OS=Escherichia coli (strain K12) OX=83333 GN=sodC PE=1 SV=1	P0AGD1	Superoxide dismutase [Cu-Zn]	sodC	0.87317	46.6146	0.88028	46.8164	0.79023	44.1413	3.8284	79.2892		3	5	5	8	3	5	5	8	74.6	17.681	502950000	260660000	242290000	811770000	404410000	407360000	801600000	421300000	380290000	1739700000	304700000	1435000000
sp|P0AGD3|SODF_ECOLI Superoxide dismutase [Fe] OS=Escherichia coli (strain K12) OX=83333 GN=sodB PE=1 SV=2	P0AGD3	Superoxide dismutase [Fe]	sodB	0.79432	44.2686	0.81021	44.7578	0.7995	44.429	1.0284	50.7001		8	7	7	7	8	7	7	7	62.2	21.265	2992800000	1643800000	1349000000	2526200000	1356800000	1169500000	2639400000	1446600000	1192800000	1816000000	839150000	976880000
sp|P0AGD7|SRP54_ECOLI Signal recognition particle protein OS=Escherichia coli (strain K12) OX=83333 GN=ffh PE=1 SV=1	P0AGD7	Signal recognition particle protein	ffh	0.46324	31.6585	0.52058	34.2356	0.52351	34.3621	2.6986	72.9627		17	17	15	13	17	17	15	13	55.8	49.787	3278100000	2172800000	1105200000	2945700000	1892200000	1053500000	3280300000	2111800000	1168500000	2165000000	593500000	1571500000
sp|P0AGE0|SSB_ECOLI Single-stranded DNA-binding protein OS=Escherichia coli (strain K12) OX=83333 GN=ssb PE=1 SV=2	P0AGE0	Single-stranded DNA-binding protein	ssb	0.65156	39.4512	0.5475	35.3796	0.51516	34.0004	2.3434	70.0903		3	3	2	5	3	3	2	5	41.6	18.975	585510000	324510000	261000000	860330000	627070000	233270000	477750000	266310000	211440000	1043400000	289260000	754140000
sp|P0AGE4|SSTT_ECOLI Serine/threonine transporter SstT OS=Escherichia coli (strain K12) OX=83333 GN=sstT PE=1 SV=1	P0AGE4	Serine/threonine transporter SstT	sstT										2	2	2		2	2	2	1	6.3	43.477	144630000	116950000	27675000	124340000	94140000	30203000	150700000	113920000	36782000	48003000	0	48003000
sp|P0AGE6|CHRR_ECOLI Quinone reductase OS=Escherichia coli (strain K12) OX=83333 GN=chrR PE=1 SV=1	P0AGE6	Chromate reductase	chrR	0.68236	40.5597	0.66811	40.0519			3.5031	77.7931		2	2	3	6	2	2	3	6	73.4	20.375	372340000	236020000	136320000	349450000	209910000	139530000	184590000	113540000	71052000	828030000	191090000	636940000
sp|P0AGE9|SUCD_ECOLI Succinate--CoA ligase [ADP-forming] subunit alpha OS=Escherichia coli (strain K12) OX=83333 GN=sucD PE=1 SV=2	P0AGE9	Succinyl-CoA ligase [ADP-forming] subunit alpha	sucD	0.32608	24.5898	0.34842	25.8391	0.344	25.5952	1.7395	63.497		15	16	15	14	15	16	15	14	74.4	29.777	10242000000	8266000000	1976200000	10040000000	7883400000	2156700000	11317000000	8929200000	2387900000	8432400000	2374100000	6058400000
sp|P0AGF2|CSDE_ECOLI Sulfur acceptor protein CsdE OS=Escherichia coli (strain K12) OX=83333 GN=csdE PE=1 SV=1	P0AGF2	Sulfur acceptor protein CsdE	csdE							2.651	72.6102					2	0	0	0	2	17.7	15.94	0	0	0	0	0	0	0	0	0	131600000	38709000	92892000
sp|P0AGG0|THIL_ECOLI Thiamine-monophosphate kinase OS=Escherichia coli (strain K12) OX=83333 GN=thiL PE=1 SV=1	P0AGG0	Thiamine-monophosphate kinase	thiL											3		2	0	3	1	2	20	35.07	0	0	0	29610000	29610000	0	52847000	31168000	21680000	99025000	28315000	70711000
sp|P0AGG2|TESB_ECOLI Acyl-CoA thioesterase 2 OS=Escherichia coli (strain K12) OX=83333 GN=tesB PE=1 SV=2	P0AGG2	Acyl-CoA thioesterase 2	tesB	0.70082	41.2048	0.64272	39.1254	0.68774	40.7492	2.9354	74.5896		4	4	6	7	4	4	6	7	46.5	31.966	1117900000	664200000	453750000	896650000	516940000	379710000	818360000	504640000	313720000	1417500000	382440000	1035100000
sp|P0AGG4|THIO2_ECOLI Thioredoxin 2 OS=Escherichia coli (strain K12) OX=83333 GN=trxC PE=1 SV=1	P0AGG4	Thioredoxin-2	trxC										2	2		3	2	2	1	3	25.9	15.555	0	0	0	0	0	0	0	0	0	0	0	0
sp|P0AGG8|TLDD_ECOLI Metalloprotease TldD OS=Escherichia coli (strain K12) OX=83333 GN=tldD PE=1 SV=1	P0AGG8	Metalloprotease TldD	tldD	0.47205	32.0675	0.51743	34.0991	0.51715	34.0869	2.9515	74.6932		8	8	8	7	8	8	8	7	32.4	51.363	2606500000	1729300000	877180000	1995100000	1323400000	671700000	2181100000	1413800000	767330000	1984600000	506810000	1477800000
sp|P0AGH1|YHHJ_ECOLI Inner membrane transport permease YhhJ OS=Escherichia coli (strain K12) OX=83333 GN=yhhJ PE=1 SV=3	P0AGH1	Inner membrane transport permease YhhJ	yhhJ										2	2			2	2	1	0	8.6	41.061	0	0	0	0	0	0	0	0	0	0	0	0
sp|P0AGI8|TRKA_ECOLI Trk system potassium uptake protein TrkA OS=Escherichia coli (strain K12) OX=83333 GN=trkA PE=1 SV=1	P0AGI8	Trk system potassium uptake protein TrkA	trkA	0.5031	33.4708	0.54438	35.2491	0.54703	35.36	2.8935	74.3162		11	8	9	4	11	8	9	4	34.5	50.367	660300000	418250000	242040000	502320000	307610000	194720000	447750000	336070000	111680000	147400000	36733000	110670000
sp|P0AGJ2|TRMH_ECOLI tRNA (guanosine(18)-2-O)-methyltransferase OS=Escherichia coli (strain K12) OX=83333 GN=trmH PE=1 SV=1	P0AGJ2	tRNA (guanosine(18)-2-O)-methyltransferase	trmH											2		2	1	2	1	2	25.3	25.343	0	0	0	46122000	35468000	10654000	0	0	0	24701000	0	24701000
sp|P0AGJ5|YFIF_ECOLI Uncharacterized tRNA/rRNA methyltransferase YfiF OS=Escherichia coli (strain K12) OX=83333 GN=yfiF PE=1 SV=1	P0AGJ5	Uncharacterized tRNA/rRNA methyltransferase YfiF	yfiF							2.7284	73.1788		7	5	5	8	7	5	5	8	36.8	37.784	264140000	160580000	103560000	228730000	109980000	118750000	292950000	196930000	96021000	823090000	223440000	599650000
sp|P0AGJ7|TRML_ECOLI tRNA (cytidine(34)-2-O)-methyltransferase OS=Escherichia coli (strain K12) OX=83333 GN=trmL PE=1 SV=1	P0AGJ7	tRNA (cytidine(34)-2-O)-methyltransferase	trmL										2		2		2	1	2	1	25.5	17.726	0	0	0	0	0	0	0	0	0	23285000	23285000	0
sp|P0AGJ9|SYY_ECOLI Tyrosine--tRNA ligase OS=Escherichia coli (strain K12) OX=83333 GN=tyrS PE=1 SV=2;sp|C4ZYA0|SYY_ECOBW Tyrosine--tRNA ligase OS=Escherichia coli (strain K12 / MC4100 / BW2952) OX=595496 GN=tyrS PE=3 SV=1;sp|B1XFU9|SYY_ECODH Tyrosine--tRN	P0AGJ9	Tyrosine--tRNA ligase	tyrS	0.33718	25.2158	0.38114	27.596	0.39456	28.2928	2.6505	72.6065		16	15	15	16	16	15	15	16	41.5	47.526	7078800000	5293000000	1785800000	5404100000	3842900000	1561200000	5003900000	3845300000	1158600000	6193000000	1486000000	4707000000
sp|P0AGK4|YHBY_ECOLI RNA-binding protein YhbY OS=Escherichia coli (strain K12) OX=83333 GN=yhbY PE=1 SV=1	P0AGK4	RNA-binding protein YhbY	yhbY											2			1	2	1	1	18.6	10.784	169230000	110030000	59201000	178060000	119710000	58355000	243270000	175790000	67482000	354100000	121230000	232880000
sp|P0AGK8|ISCR_ECOLI HTH-type transcriptional regulator IscR OS=Escherichia coli (strain K12) OX=83333 GN=iscR PE=1 SV=1;sp|C4ZXA6|ISCR_ECOBW HTH-type transcriptional regulator IscR OS=Escherichia coli (strain K12 / MC4100 / BW2952) OX=595496 GN=iscR PE=3	P0AGK8	HTH-type transcriptional regulator IscR	iscR							4.4919	81.7914					7	1	1	1	7	40.7	17.336	205590000	108450000	97140000	130880000	70633000	60250000	170150000	108290000	61865000	1581500000	290570000	1290900000
sp|P0AGL2|TDCF_ECOLI Putative reactive intermediate deaminase TdcF OS=Escherichia coli (strain K12) OX=83333 GN=tdcF PE=1 SV=1	P0AGL2	Putative reactive intermediate deaminase TdcF	tdcF													2	1	1	1	2	12.4	14.007	35553000	35553000	0	0	0	0	0	0	0	35519000	35519000	0
sp|P0AGL7|RSME_ECOLI Ribosomal RNA small subunit methyltransferase E OS=Escherichia coli (strain K12) OX=83333 GN=rsmE PE=1 SV=1	P0AGL7	Ribosomal RNA small subunit methyltransferase E	rsmE										2	2	2	4	2	2	2	4	26.3	26.978	69403000	47509000	21893000	0	0	0	0	0	0	44057000	0	44057000
sp|P0AGM7|URAA_ECOLI Uracil permease OS=Escherichia coli (strain K12) OX=83333 GN=uraA PE=1 SV=1	P0AGM7	Uracil permease	uraA	0.6289	38.6089	0.62045	38.2887	0.69468	40.9918				3	2	3	2	3	2	3	2	9.6	45.06	889440000	576230000	313210000	848850000	498530000	350320000	1092400000	652980000	439460000	104120000	40329000	63792000
sp|P0AGM9|XANP_ECOLI Xanthine permease XanP OS=Escherichia coli (strain K12) OX=83333 GN=xanP PE=1 SV=1	P0AGM9	Xanthine permease XanP	xanP											2			1	2	0	0	11.9	48.867	173930000	173930000	0	138530000	100190000	38338000	0	0	0	0	0	0
sp|P0C018|RL18_ECOLI 50S ribosomal protein L18 OS=Escherichia coli (strain K12) OX=83333 GN=rplR PE=1 SV=1;sp|C4ZUF9|RL18_ECOBW 50S ribosomal protein L18 OS=Escherichia coli (strain K12 / MC4100 / BW2952) OX=595496 GN=rplR PE=3 SV=1;sp|B1X6F6|RL18_ECODH 50	P0C018	50S ribosomal protein L18	rplR	0.42639	29.8929	0.52987	34.635	0.47268	32.0966	2.1177	67.9251		9	9	9	8	9	9	9	8	79.5	12.769	2569200000	1794700000	774470000	1948300000	1272600000	675770000	2523000000	1769900000	753100000	1453300000	522080000	931210000
sp|P0C037|PPNP_ECOLI Pyrimidine/purine nucleoside phosphorylase OS=Escherichia coli (strain K12) OX=83333 GN=ppnP PE=1 SV=1;sp|C4ZTF0|PPNP_ECOBW Pyrimidine/purine nucleoside phosphorylase OS=Escherichia coli (strain K12 / MC4100 / BW2952) OX=595496 GN=ppnP	P0C037	UPF0345 protein YaiE	yaiE													2	1	1	1	2	23.4	10.234	170870000	110220000	60650000	205660000	125230000	80424000	135700000	61960000	73738000	1093900000	247410000	846500000
sp|P0C054|IBPA_ECOLI Small heat shock protein IbpA OS=Escherichia coli (strain K12) OX=83333 GN=ibpA PE=1 SV=1;sp|C4ZYW4|IBPA_ECOBW Small heat shock protein IbpA OS=Escherichia coli (strain K12 / MC4100 / BW2952) OX=595496 GN=ibpA PE=3 SV=1;sp|B1X9B7|IBPA_	P0C054	Small heat shock protein IbpA	ibpA										4	4	4	3	4	4	4	3	35	15.774	0	0	0	0	0	0	0	0	0	0	0	0
sp|P0C066|MLTC_ECOLI Membrane-bound lytic murein transglycosylase C OS=Escherichia coli (strain K12) OX=83333 GN=mltC PE=1 SV=1;sp|C5A0N2|MLTC_ECOBW Membrane-bound lytic murein transglycosylase C OS=Escherichia coli (strain K12 / MC4100 / BW2952) OX=595496	P0C066	Membrane-bound lytic murein transglycosylase C	mltC			0.64329	39.1465	0.64204	39.1001				4	4	4	4	4	4	4	4	30.4	40.112	166270000	97310000	68956000	272860000	169640000	103220000	169670000	121000000	48673000	93401000	11031000	82370000
sp|P0C079|RELB_ECOLI Antitoxin RelB OS=Escherichia coli (strain K12) OX=83333 GN=relB PE=1 SV=1	P0C079	Antitoxin RelB	relB													2	0	0	0	2	27.8	9.0714	0	0	0	0	0	0	0	0	0	49246000	0	49246000
sp|P0C093|SLMA_ECOLI Nucleoid occlusion factor SlmA OS=Escherichia coli (strain K12) OX=83333 GN=slmA PE=1 SV=1;sp|C4ZXN3|SLMA_ECOBW Nucleoid occlusion factor SlmA OS=Escherichia coli (strain K12 / MC4100 / BW2952) OX=595496 GN=slmA PE=3 SV=1;sp|B1X975|SLM	P0C093	Nucleoid occlusion factor SlmA	slmA													2	1	0	1	2	20.2	22.836	0	0	0	0	0	0	0	0	0	16574000	0	16574000
sp|P0C0K3|SRKA_ECOLI Stress response kinase A OS=Escherichia coli (strain K12) OX=83333 GN=srkA PE=1 SV=1	P0C0K3	Protein RdoA	rdoA											2			0	2	1	1	8.5	38.12	0	0	0	0	0	0	0	0	0	0	0	0
sp|P0C0L2|OSMC_ECOLI Peroxiredoxin OsmC OS=Escherichia coli (strain K12) OX=83333 GN=osmC PE=1 SV=2	P0C0L2	Peroxiredoxin OsmC	osmC	0.80251	44.5218	0.78304	43.916	0.73535	42.3747	3.7633	79.0062		7	8	8	8	7	8	8	8	58.7	15.088	8808300000	4852400000	3955900000	10476000000	5888300000	4588000000	11446000000	6747500000	4698300000	31046000000	6523700000	24522000000
sp|P0C0L7|PROP_ECOLI Proline/betaine transporter OS=Escherichia coli (strain K12) OX=83333 GN=proP PE=1 SV=1	P0C0L7	Proline/betaine transporter	proP	0.35059	25.9583	0.32714	24.65	0.3445	25.6229	2.4894	71.3418		6	5	6	6	6	5	6	6	16	54.845	3254300000	2319000000	935300000	2114500000	1497500000	617070000	4653800000	3239000000	1414800000	1558400000	190670000	1367700000
sp|P0C0R7|RLME_ECOLI Ribosomal RNA large subunit methyltransferase E OS=Escherichia coli (strain K12) OX=83333 GN=rlmE PE=1 SV=1;sp|C4ZSR8|RLME_ECOBW Ribosomal RNA large subunit methyltransferase E OS=Escherichia coli (strain K12 / MC4100 / BW2952) OX=5954	P0C0R7	Ribosomal RNA large subunit methyltransferase E	rlmE										3	3	2	3	3	3	2	3	24.4	23.335	127510000	0	127510000	49436000	36115000	13322000	53067000	27644000	25423000	48644000	10058000	38587000
sp|P0C0S1|MSCS_ECOLI Small-conductance mechanosensitive channel OS=Escherichia coli (strain K12) OX=83333 GN=mscS PE=1 SV=1	P0C0S1	Small-conductance mechanosensitive channel	mscS	0.5151	33.9978	0.50291	33.4624	0.4879	32.7912	3.5343	77.9459		12	12	13	12	12	12	13	12	38.5	30.896	8329900000	5423600000	2906300000	8893000000	5707000000	3186000000	11022000000	7269800000	3752300000	2684600000	493750000	2190800000
sp|P0C0U4|RIMK_ECOLI Ribosomal protein S6--L-glutamate ligase OS=Escherichia coli (strain K12) OX=83333 GN=rimK PE=1 SV=1;sp|C4ZY24|RIMK_ECOBW Ribosomal protein S6--L-glutamate ligase OS=Escherichia coli (strain K12 / MC4100 / BW2952) OX=595496 GN=rimK PE=	P0C0U4	Ribosomal protein S6--L-glutamate ligase	rimK										3	2		2	3	2	1	2	29.3	32.436	58537000	31197000	27340000	0	0	0	0	0	0	71644000	13588000	58056000
sp|P0C0V0|DEGP_ECOLI Periplasmic serine endoprotease DegP OS=Escherichia coli (strain K12) OX=83333 GN=degP PE=1 SV=1	P0C0V0	Periplasmic serine endoprotease DegP	degP	0.52376	34.3729	0.56243	35.9971	0.55337	35.6238	2.6928	72.9203		22	21	20	20	22	21	20	20	65.2	49.354	10303000000	6964300000	3338400000	12841000000	8418200000	4422700000	12145000000	7949200000	4196300000	6970200000	1638400000	5331800000
sp|P0C8J6|GATY_ECOLI D-tagatose-1,6-bisphosphate aldolase subunit GatY OS=Escherichia coli (strain K12) OX=83333 GN=gatY PE=1 SV=1;sp|C4ZSI0|GATY_ECOBW D-tagatose-1,6-bisphosphate aldolase subunit GatY OS=Escherichia coli (strain K12 / MC4100 / BW2952) OX=	P0C8J6	D-tagatose-1,6-bisphosphate aldolase subunit GatY	gatY	0.48436	32.6309	0.59014	37.1125	0.60647	37.7517	1.5975	61.5014		8	8	7	6	8	8	7	6	32.4	30.812	2735700000	1938400000	797260000	2762000000	1818900000	943080000	2738300000	1775900000	962420000	1105200000	424430000	680810000
sp|P0C8J8|GATZ_ECOLI D-tagatose-1,6-bisphosphate aldolase subunit GatZ OS=Escherichia coli (strain K12) OX=83333 GN=gatZ PE=1 SV=1;sp|C4ZSH9|GATZ_ECOBW D-tagatose-1,6-bisphosphate aldolase subunit GatZ OS=Escherichia coli (strain K12 / MC4100 / BW2952) OX=	P0C8J8	D-tagatose-1,6-bisphosphate aldolase subunit GatZ	gatZ	0.95053	48.7319	1.2995	56.5123	1.3427	57.3142				16	12	16		15	11	15	0	65	47.108	2728400000	1684000000	1044400000	1492000000	600050000	891990000	1650600000	544440000	1106100000	0	0	0
sp|P0C960|EMTA_ECOLI Endo-type membrane-bound lytic murein transglycosylase A OS=Escherichia coli (strain K12) OX=83333 GN=emtA PE=1 SV=1;sp|C4ZTN4|EMTA_ECOBW Endo-type membrane-bound lytic murein transglycosylase A OS=Escherichia coli (strain K12 / MC4100	P0C960	Endo-type membrane-bound lytic murein transglycosylase A	emtA							3.179	76.0708					4	0	0	1	4	33	22.226	0	0	0	0	0	0	0	0	0	435790000	91036000	344760000
sp|P0CB39|EPTC_ECOLI Phosphoethanolamine transferase EptC OS=Escherichia coli (strain K12) OX=83333 GN=eptC PE=1 SV=1	P0CB39	Phosphoethanolamine transferase EptC	eptC	0.32672	24.6261	0.37282	27.1572	0.36765	26.8819	1.9438	66.0303		17	17	20	5	17	17	20	5	52.3	66.609	2823300000	2280500000	542790000	3315800000	2493600000	822200000	3835500000	2879000000	956480000	568230000	204890000	363340000
sp|P0CE65|INH18_ECOLI Transposase InsH for insertion sequence element IS5-18 OS=Escherichia coli (strain K12) OX=83333 GN=JW5951 PE=3 SV=1;sp|P0CE64|INH17_ECOLI Transposase InsH for insertion sequence element IS5-17 OS=Escherichia coli (strain K12) OX=8333	P0CE65	Transposase InsH for insertion sequence element IS5-18;Transposase InsH for insertion sequence element IS5-17;Transposase InsH for insertion sequence element IS5-16;Transposase InsH for insertion sequence element IS5-15;Transposase InsH for insertion sequence element IS5-14;Transposase InsH for insertion sequence element IS5-13;Transposase InsH for insertion sequence element IS5Y;Transposase InsH…	JW5951;JW5936;JW5935;JW5928;JW5914;JW5895;insH;insH5;JW1882;insH11;insH10;insH9;insH8;insH7;insH6;insH4;insH3;insH2;insH1	1.692	62.8529			2.0142	66.8237				2		2		2	1	2	0	9.5	37.851	252910000	105710000	147210000	160750000	62417000	98332000	198830000	62540000	136290000	0	0	0
sp|P0CG19|RNPH_ECOLI Truncated inactive ribonuclease PH OS=Escherichia coli (strain K12) OX=83333 GN=rph PE=1 SV=1;sp|P0CG18|RNPH_ECOBW Ribonuclease PH OS=Escherichia coli (strain K12 / MC4100 / BW2952) OX=595496 GN=rph PE=1 SV=1	P0CG19	Inactive ribonuclease PH;Ribonuclease PH	rph											2	2	2	1	2	2	2	11	24.425	0	0	0	0	0	0	0	0	0	0	0	0
sp|P0CK95|ACFD_ECOLI Putative lipoprotein AcfD homolog OS=Escherichia coli (strain K12) OX=83333 GN=yghJ PE=3 SV=1	P0CK95	Putative lipoprotein AcfD homolog	yghJ			0.26436	20.9086						5	5	7	2	5	5	7	2	14.7	167.24	89475000	89475000	0	140220000	120340000	19885000	104540000	104540000	0	441160000	131240000	309920000
sp|P0DMC5|RCSC_ECOLI Sensor histidine kinase RcsC OS=Escherichia coli (strain K12) OX=83333 GN=rcsC PE=1 SV=1	P0DMC5	Sensor histidine kinase RcsC	rcsC	0.36726	26.861	0.48535	32.6758	0.53638	34.9119				8	12	11	3	8	12	11	3	23.5	106.51	210470000	153960000	56509000	351600000	239220000	112380000	368910000	280860000	88053000	91004000	31423000	59581000
sp|P0DMC7|RCSB_ECOLI Transcriptional regulatory protein RcsB OS=Escherichia coli (strain K12) OX=83333 GN=rcsB PE=1 SV=1	P0DMC7	Transcriptional regulatory protein RcsB	rcsB	0.56315	36.0266	0.60044	37.5172	0.59361	37.2494	2.8289	73.8828		9	8	6	5	9	8	6	5	54.6	23.67	10021000000	6216500000	3804900000	7053200000	4237100000	2816000000	9307800000	5558500000	3749300000	5363600000	1427700000	3935900000
sp|P0DMC9|RCSA_ECOLI Transcriptional regulatory protein RcsA OS=Escherichia coli (strain K12) OX=83333 GN=rcsA PE=1 SV=1	P0DMC9	Transcriptional regulatory protein RcsA	rcsA											3	2		1	3	2	0	19.8	23.516	0	0	0	15973000	0	15973000	28513000	0	28513000	0	0	0
sp|P0DP89|ILVGP_ECOLI Putative acetolactate synthase isozyme 2 large subunit OS=Escherichia coli (strain K12) OX=83333 GN=ilvG PE=5 SV=1;sp|P0DP90|ILVG_ECOLI Acetolactate synthase isozyme 2 large subunit OS=Escherichia coli (strain K12) OX=83333 GN=ilvG PE	P0DP89			4.498	81.8116								5	6	4		5	6	4	1	35.8	34.506	345780000	57847000	287940000	311350000	30596000	280750000	376840000	28883000	347950000	0	0	0
sp|P10100|RLPA_ECOLI Endolytic peptidoglycan transglycosylase RlpA OS=Escherichia coli (strain K12) OX=83333 GN=rlpA PE=1 SV=1	P10100	Rare lipoprotein A	rlpA	0.43652	30.3873	0.4875	32.7731	0.53801	34.9809	2.9042	74.3866		4	7	6	3	4	7	6	3	52.5	37.528	767760000	532800000	234960000	1278500000	855660000	422860000	1253400000	801190000	452250000	345880000	88768000	257120000
sp|P10121|FTSY_ECOLI Signal recognition particle receptor FtsY OS=Escherichia coli (strain K12) OX=83333 GN=ftsY PE=1 SV=1	P10121	Signal recognition particle receptor FtsY	ftsY	0.39653	28.3939	0.41898	29.5268	0.43238	30.1861	2.5219	71.6062		18	18	16	10	18	18	16	10	45.5	54.513	4841200000	3209300000	1631900000	3578800000	2551500000	1027300000	4815300000	3418200000	1397100000	1328900000	256270000	1072700000
sp|P10346|GLNQ_ECOLI Glutamine transport ATP-binding protein GlnQ OS=Escherichia coli (strain K12) OX=83333 GN=glnQ PE=1 SV=1	P10346	Glutamine transport ATP-binding protein GlnQ	glnQ	0.29824	22.9726	0.3372	25.2169	0.37574	27.3118	2.202	68.7695		8	8	7	7	8	8	7	7	36.7	26.731	2098800000	1619600000	479200000	2856700000	2166300000	690400000	3194300000	2295800000	898460000	1305700000	415060000	890640000
sp|P10371|HIS4_ECOLI 1-(5-phosphoribosyl)-5-[(5-phosphoribosylamino)methylideneamino] imidazole-4-carboxamide isomerase OS=Escherichia coli (strain K12) OX=83333 GN=hisA PE=3 SV=2;sp|C4ZSB3|HIS4_ECOBW 1-(5-phosphoribosyl)-5-[(5-phosphoribosylamino)methylid	P10371	1-(5-phosphoribosyl)-5-[(5-phosphoribosylamino)methylideneamino] imidazole-4-carboxamide isomerase	hisA					0.40258	28.7028				3	2	5	4	3	2	5	4	36.7	26.032	207940000	137380000	70561000	242760000	194170000	48589000	360260000	268700000	91562000	422840000	111360000	311480000
sp|P10378|ENTE_ECOLI Enterobactin synthase component E OS=Escherichia coli (strain K12) OX=83333 GN=entE PE=1 SV=3	P10378	Enterobactin synthase component E	entE							4.3969	81.4708		13	11	10	23	13	11	10	23	53.2	59.111	53431000	53431000	0	0	0	0	0	0	0	390270000	37001000	353270000
sp|P10384|FADL_ECOLI Long-chain fatty acid transport protein OS=Escherichia coli (strain K12) OX=83333 GN=fadL PE=1 SV=5	P10384	Long-chain fatty acid transport protein	fadL	0.40861	29.008			0.41941	29.5482				11	6	10	3	11	6	10	3	42.6	48.541	2419200000	1829800000	589350000	1429200000	1039400000	389740000	2572900000	1844900000	727990000	306500000	80931000	225570000
sp|P10408|SECA_ECOLI Protein translocase subunit SecA OS=Escherichia coli (strain K12) OX=83333 GN=secA PE=1 SV=2;sp|C4ZRJ3|SECA_ECOBW Protein translocase subunit SecA OS=Escherichia coli (strain K12 / MC4100 / BW2952) OX=595496 GN=secA PE=3 SV=1;sp|B1XC75	P10408	Protein translocase subunit SecA	secA	0.30827	23.5632	0.34051	25.4015	0.33548	25.1206	2.4656	71.145		45	43	45	33	45	43	45	33	70.1	102.02	16138000000	12486000000	3652000000	14204000000	10949000000	3255800000	15273000000	11827000000	3445700000	6007700000	1665100000	4342600000
sp|P10441|LPXB_ECOLI Lipid-A-disaccharide synthase OS=Escherichia coli (strain K12) OX=83333 GN=lpxB PE=1 SV=2;sp|C4ZRS4|LPXB_ECOBW Lipid-A-disaccharide synthase OS=Escherichia coli (strain K12 / MC4100 / BW2952) OX=595496 GN=lpxB PE=3 SV=1;sp|B1XD51|LPXB_	P10441	Lipid-A-disaccharide synthase	lpxB	0.40016	28.5796	0.41193	29.175	0.44464	30.7786	2.3122	69.8086		5	6	5	2	5	6	5	2	27	42.382	230880000	184260000	46621000	269380000	185440000	83946000	183020000	123790000	59231000	77659000	22347000	55312000
sp|P10443|DPO3A_ECOLI DNA polymerase III subunit alpha OS=Escherichia coli (strain K12) OX=83333 GN=dnaE PE=1 SV=1	P10443	DNA polymerase III subunit alpha	dnaE										3		2		3	1	2	1	5.8	129.9	79994000	53864000	26130000	20573000	20573000	0	29013000	29013000	0	17661000	0	17661000
sp|P10902|NADB_ECOLI L-aspartate oxidase OS=Escherichia coli (strain K12) OX=83333 GN=nadB PE=1 SV=4	P10902	L-aspartate oxidase	nadB	0.60175	37.5683	0.76137	43.226	0.71658	41.7446				9	7	7	5	9	7	7	5	25.4	60.337	727140000	502500000	224640000	822160000	502790000	319370000	638580000	431660000	206930000	122150000	30072000	92078000
sp|P10907|UGPC_ECOLI sn-glycerol-3-phosphate import ATP-binding protein UgpC OS=Escherichia coli (strain K12) OX=83333 GN=ugpC PE=1 SV=3	P10907	sn-glycerol-3-phosphate import ATP-binding protein UgpC	ugpC			0.55401	35.6503						2	3	5		2	3	5	1	21.9	39.523	43515000	28600000	14915000	308790000	193510000	115280000	332070000	218210000	113860000	64145000	0	64145000
sp|P10908|UGPQ_ECOLI Glycerophosphodiester phosphodiesterase, cytoplasmic OS=Escherichia coli (strain K12) OX=83333 GN=ugpQ PE=1 SV=1	P10908	Glycerophosphoryl diester phosphodiesterase	ugpQ	0.46218	31.609								3	3	3		3	3	3	1	18.2	27.409	417180000	287900000	129280000	76216000	49699000	26517000	27431000	27431000	0	0	0	0
sp|P11446|ARGC_ECOLI N-acetyl-gamma-glutamyl-phosphate reductase OS=Escherichia coli (strain K12) OX=83333 GN=argC PE=1 SV=1	P11446	N-acetyl-gamma-glutamyl-phosphate reductase	argC	0.46254	31.6258	0.58176	36.7793	0.59774	37.4116	1.2935	56.3985		6	6	8	6	6	6	8	6	35.6	35.952	1278700000	886040000	392630000	1172400000	705190000	467220000	1415300000	822630000	592670000	936110000	392130000	543970000
sp|P11447|ARLY_ECOLI Argininosuccinate lyase OS=Escherichia coli (strain K12) OX=83333 GN=argH PE=1 SV=3;sp|C5A0Q9|ARLY_ECOBW Argininosuccinate lyase OS=Escherichia coli (strain K12 / MC4100 / BW2952) OX=595496 GN=argH PE=3 SV=1;sp|B1XBC5|ARLY_ECODH Argini	P11447	Argininosuccinate lyase	argH	0.42769	29.9568	0.63283	38.7566	0.61999	38.2712	1.6314	61.9974		11	8	7	9	11	8	7	9	39.4	50.318	1531100000	1175400000	355720000	704330000	526070000	178260000	1009800000	609110000	400710000	936890000	404110000	532770000
sp|P11454|ENTF_ECOLI Enterobactin synthase component F OS=Escherichia coli (strain K12) OX=83333 GN=entF PE=1 SV=3	P11454	Enterobactin synthase component F	entF							3.5629	78.0841		17	16	16	34	17	16	16	34	29.3	141.99	1037800000	1037800000	0	647960000	636290000	11668000	700020000	682930000	17091000	5275800000	1029700000	4246100000
sp|P11458|NADA_ECOLI Quinolinate synthase A OS=Escherichia coli (strain K12) OX=83333 GN=nadA PE=1 SV=3;sp|C4ZXS1|NADA_ECOBW Quinolinate synthase A OS=Escherichia coli (strain K12 / MC4100 / BW2952) OX=595496 GN=nadA PE=3 SV=1;sp|B1X6S4|NADA_ECODH Quinolin	P11458	Quinolinate synthase A	nadA										3	4	4	3	3	4	4	3	21	38.24	0	0	0	58132000	26134000	31998000	70263000	33444000	36819000	54153000	0	54153000
sp|P11557|DAMX_ECOLI Cell division protein DamX OS=Escherichia coli (strain K12) OX=83333 GN=damX PE=1 SV=2	P11557	Cell division protein DamX	damX	0.41355	29.2561	0.44859	30.9674	0.44782	30.9306	2.7249	73.1536		6	9	8	6	6	9	8	6	32	46.161	4455600000	3116900000	1338800000	5002900000	3428900000	1574000000	4274100000	2755400000	1518700000	2705300000	763720000	1941600000
sp|P11875|SYR_ECOLI Arginine--tRNA ligase OS=Escherichia coli (strain K12) OX=83333 GN=argS PE=1 SV=1;sp|C4ZQG0|SYR_ECOBW Arginine--tRNA ligase OS=Escherichia coli (strain K12 / MC4100 / BW2952) OX=595496 GN=argS PE=3 SV=1;sp|B1XHE4|SYR_ECODH Arginine--tRN	P11875	Arginine--tRNA ligase	argS	0.47551	32.2268	0.53562	34.8797	0.51574	34.0256	2.4773	71.2421		12	13	11	20	12	13	11	20	54.8	64.682	586100000	488720000	97382000	1050000000	806080000	243940000	762580000	633970000	128610000	2274300000	544040000	1730300000
sp|P11880|MURF_ECOLI UDP-N-acetylmuramoyl-tripeptide--D-alanyl-D-alanine ligase OS=Escherichia coli (strain K12) OX=83333 GN=murF PE=1 SV=2	P11880	UDP-N-acetylmuramoyl-tripeptide--D-alanyl-D-alanine ligase	murF			0.53913	35.0282	0.56406	36.0638	2.902	74.3721		3	4	5	4	3	4	5	4	14.6	47.447	236450000	168460000	67995000	358390000	236400000	122000000	442540000	296660000	145880000	909350000	221670000	687670000
sp|P12008|AROC_ECOLI Chorismate synthase OS=Escherichia coli (strain K12) OX=83333 GN=aroC PE=1 SV=4;sp|C4ZVM2|AROC_ECOBW Chorismate synthase OS=Escherichia coli (strain K12 / MC4100 / BW2952) OX=595496 GN=aroC PE=3 SV=1;sp|B1X9K2|AROC_ECODH Chorismate syn	P12008	Chorismate synthase	aroC	0.51888	34.162	0.48289	32.5641	0.48333	32.5841	2.5171	71.5675		6	6	6	7	6	6	6	7	37.7	39.137	859730000	622950000	236770000	705400000	428120000	277280000	940800000	628710000	312090000	1060500000	243600000	816940000
sp|P12281|MOEA_ECOLI Molybdopterin molybdenumtransferase OS=Escherichia coli (strain K12) OX=83333 GN=moeA PE=1 SV=1	P12281	Molybdopterin molybdenumtransferase	moeA	0.48951	32.8638	0.62135	38.323						4	5	5	6	4	5	5	6	29.7	44.067	198470000	128410000	70056000	253190000	166970000	86220000	17488000	17488000	0	545060000	154560000	390510000
sp|P12295|UNG_ECOLI Uracil-DNA glycosylase OS=Escherichia coli (strain K12) OX=83333 GN=ung PE=1 SV=2;sp|C4ZYK3|UNG_ECOBW Uracil-DNA glycosylase OS=Escherichia coli (strain K12 / MC4100 / BW2952) OX=595496 GN=ung PE=3 SV=1;sp|B1XBQ7|UNG_ECODH Uracil-DNA gl	P12295	Uracil-DNA glycosylase	ung												2	4	0	1	2	4	17.5	25.693	0	0	0	0	0	0	30572000	17470000	13102000	84821000	12540000	72282000
sp|P12758|UDP_ECOLI Uridine phosphorylase OS=Escherichia coli (strain K12) OX=83333 GN=udp PE=1 SV=3	P12758	Uridine phosphorylase	udp	0.72109	41.8973	0.64872	39.3469	0.64239	39.1131	3.109	75.6632		9	7	10	12	9	7	10	12	54.9	27.159	3006200000	1573300000	1432900000	2292200000	1556300000	735920000	2346600000	1463900000	882700000	5934500000	1264300000	4670300000
sp|P12994|YBHB_ECOLI UPF0098 protein YbhB OS=Escherichia coli (strain K12) OX=83333 GN=ybhB PE=1 SV=2	P12994	UPF0098 protein YbhB	ybhB							2.7558	73.3745			2	2	3	1	2	2	3	32.9	17.085	0	0	0	57055000	35061000	21994000	78921000	36559000	42362000	127580000	32835000	94743000
sp|P12995|BIOA_ECOLI Adenosylmethionine-8-amino-7-oxononanoate aminotransferase OS=Escherichia coli (strain K12) OX=83333 GN=bioA PE=1 SV=2	P12995	Adenosylmethionine-8-amino-7-oxononanoate aminotransferase	bioA	0.67395	40.2611			0.73145	42.2449				4	3	4	5	4	3	4	5	31.9	47.335	262070000	141360000	120700000	238010000	140580000	97426000	283320000	162110000	121210000	83086000	12029000	71057000
sp|P12996|BIOB_ECOLI Biotin synthase OS=Escherichia coli (strain K12) OX=83333 GN=bioB PE=1 SV=2;sp|B1X7A5|BIOB_ECODH Biotin synthase OS=Escherichia coli (strain K12 / DH10B) OX=316385 GN=bioB PE=3 SV=1	P12996	Biotin synthase	bioB	1.8696	65.1519	1.9879	66.5317	2.317	69.8523				8	6	8	2	8	6	8	2	43.9	38.648	742630000	230880000	511750000	783550000	268180000	515380000	706140000	255420000	450720000	38377000	0	38377000
sp|P12998|BIOF_ECOLI 8-amino-7-oxononanoate synthase OS=Escherichia coli (strain K12) OX=83333 GN=bioF PE=1 SV=1;sp|B1X7A6|BIOF_ECODH 8-amino-7-oxononanoate synthase OS=Escherichia coli (strain K12 / DH10B) OX=316385 GN=bioF PE=3 SV=1	P12998	8-amino-7-oxononanoate synthase	bioF											2	2		1	2	2	0	10.7	41.594	0	0	0	0	0	0	23359000	13192000	10167000	0	0	0
sp|P13000|BIOD1_ECOLI ATP-dependent dethiobiotin synthetase BioD 1 OS=Escherichia coli (strain K12) OX=83333 GN=bioD1 PE=1 SV=3	P13000	ATP-dependent dethiobiotin synthetase BioD 1	bioD1	0.55705	35.776	0.64662	39.2695	0.67466	40.2864				8	6	7	5	8	6	7	5	44.4	24.139	4188800000	2705400000	1483400000	3038900000	1907300000	1131600000	3294100000	1966500000	1327600000	895910000	171990000	723920000
sp|P13001|BIOH_ECOLI Pimeloyl-[acyl-carrier protein] methyl ester esterase OS=Escherichia coli (strain K12) OX=83333 GN=bioH PE=1 SV=1;sp|C4ZUR7|BIOH_ECOBW Pimeloyl-[acyl-carrier protein] methyl ester esterase OS=Escherichia coli (strain K12 / MC4100 / BW2	P13001	Pimeloyl-[acyl-carrier protein] methyl ester esterase	bioH													2	0	0	0	2	11.3	28.505	0	0	0	0	0	0	0	0	0	11842000	0	11842000
sp|P13009|METH_ECOLI Methionine synthase OS=Escherichia coli (strain K12) OX=83333 GN=metH PE=1 SV=5	P13009	Methionine synthase	metH	0.33928	25.333	0.38434	27.7634	0.40364	28.7567	1.4961	59.9375		43	42	41	24	43	42	41	24	57.5	136	5831700000	4427700000	1404000000	6114700000	4605700000	1509000000	6280400000	4495500000	1784900000	1781500000	779760000	1001800000
sp|P13024|FDHE_ECOLI Protein FdhE OS=Escherichia coli (strain K12) OX=83333 GN=fdhE PE=1 SV=2;sp|C5A059|FDHE_ECOBW Protein FdhE OS=Escherichia coli (strain K12 / MC4100 / BW2952) OX=595496 GN=fdhE PE=3 SV=1;sp|B1XB59|FDHE_ECODH Protein FdhE OS=Escherichia	P13024	Protein FdhE	fdhE										4	2		2	4	2	1	2	21	34.746	0	0	0	0	0	0	0	0	0	0	0	0
sp|P13029|KATG_ECOLI Catalase-peroxidase OS=Escherichia coli (strain K12) OX=83333 GN=katG PE=1 SV=2;sp|B1XBA8|KATG_ECODH Catalase-peroxidase OS=Escherichia coli (strain K12 / DH10B) OX=316385 GN=katG PE=3 SV=1	P13029	Catalase-peroxidase	katG	0.54858	35.4247	0.55994	35.895	0.59132	37.1591	2.0466	67.1765		22	23	26	20	22	23	26	20	49.7	80.023	4868900000	3159500000	1709400000	4541800000	3194800000	1347000000	4382600000	2918700000	1464000000	2510500000	782210000	1728300000
sp|P13035|GLPD_ECOLI Aerobic glycerol-3-phosphate dehydrogenase OS=Escherichia coli (strain K12) OX=83333 GN=glpD PE=1 SV=3	P13035	Aerobic glycerol-3-phosphate dehydrogenase	glpD					1.1853	54.2397				5	2	3		5	2	3	1	18	56.75	56347000	24384000	31963000	64363000	29961000	34402000	78748000	39735000	39013000	13941000	0	13941000
sp|P13036|FECA_ECOLI Fe(3+) dicitrate transport protein FecA OS=Escherichia coli (strain K12) OX=83333 GN=fecA PE=1 SV=2	P13036	Fe(3+) dicitrate transport protein FecA	fecA					0.39423	28.2758				3	5	3		3	5	3	1	16.1	85.321	150850000	150850000	0	139850000	101180000	38668000	372820000	237660000	135160000	0	0	0
sp|P13039|FES_ECOLI Enterochelin esterase OS=Escherichia coli (strain K12) OX=83333 GN=fes PE=1 SV=2	P13039	Enterochelin esterase	fes							3.6869	78.6639		4	3	3	8	4	3	3	8	34.8	45.651	206050000	206050000	0	150560000	150560000	0	209840000	209840000	0	1106100000	199870000	906270000
sp|P13445|RPOS_ECOLI RNA polymerase sigma factor RpoS OS=Escherichia coli (strain K12) OX=83333 GN=rpoS PE=1 SV=3	P13445	RNA polymerase sigma factor RpoS	rpoS	3.8018	79.1745	3.2716	76.5896	3.4088	77.3181				7	6	6	5	7	6	6	5	31.2	37.971	560170000	70751000	489420000	346450000	87548000	258900000	364240000	49793000	314440000	501890000	53440000	448450000
sp|P13458|SBCC_ECOLI Nuclease SbcCD subunit C OS=Escherichia coli (strain K12) OX=83333 GN=sbcC PE=1 SV=1	P13458	Nuclease SbcCD subunit C	sbcC												2	2	0	1	2	2	5.2	118.72	0	0	0	0	0	0	0	0	0	2690400000	1815800000	874620000
sp|P13482|TREA_ECOLI Periplasmic trehalase OS=Escherichia coli (strain K12) OX=83333 GN=treA PE=1 SV=1;sp|C4ZTN8|TREA_ECOBW Periplasmic trehalase OS=Escherichia coli (strain K12 / MC4100 / BW2952) OX=595496 GN=treA PE=3 SV=1;sp|B1XAN8|TREA_ECODH Periplasmi	P13482	Periplasmic trehalase	treA	0.6189	38.2297	0.57213	36.392	0.58037	36.7237	2.9889	74.9304		13	10	12	13	13	10	12	13	42.8	63.636	970130000	699320000	270810000	846820000	525360000	321460000	1007400000	675690000	331680000	780700000	180620000	600090000
sp|P13518|CSRD_ECOLI RNase E specificity factor CsrD OS=Escherichia coli (strain K12) OX=83333 GN=csrD PE=1 SV=2	P13518	RNase E specificity factor CsrD	csrD											2	2		1	2	2	0	5.9	73.338	86737000	54060000	32676000	28032000	28032000	0	43249000	43249000	0	0	0	0
sp|P13857|RIML_ECOLI Ribosomal-protein-serine acetyltransferase OS=Escherichia coli (strain K12) OX=83333 GN=rimL PE=1 SV=1	P13857	Ribosomal-protein-serine acetyltransferase	rimL													2	1	0	1	2	22.3	20.68	130050000	78280000	51770000	0	0	0	318840000	180450000	138390000	48104000	0	48104000
sp|P14081|SELB_ECOLI Selenocysteine-specific elongation factor OS=Escherichia coli (strain K12) OX=83333 GN=selB PE=1 SV=3	P14081	Selenocysteine-specific elongation factor	selB	0.39204	28.163	0.41505	29.3311	0.44976	31.0231	2.9806	74.8782		17	15	15	12	17	15	15	12	44	68.867	2232800000	1578100000	654680000	1692800000	1169400000	523450000	1390700000	882210000	508480000	727180000	169880000	557300000
sp|P14175|PROV_ECOLI Glycine betaine/proline betaine transport system ATP-binding protein ProV OS=Escherichia coli (strain K12) OX=83333 GN=proV PE=1 SV=1	P14175	Glycine betaine/L-proline transport ATP-binding protein ProV	proV	0.16326	14.0347	0.16995	14.5263	0.1724	14.7049				15	10	12	9	15	10	12	9	50.2	44.162	1286800000	1143200000	143640000	789250000	696770000	92484000	1155600000	1006200000	149340000	289060000	49154000	239900000
sp|P14900|MURD_ECOLI UDP-N-acetylmuramoylalanine--D-glutamate ligase OS=Escherichia coli (strain K12) OX=83333 GN=murD PE=1 SV=3	P14900	UDP-N-acetylmuramoylalanine--D-glutamate ligase	murD							3.1143	75.6945		3	4	4	8	3	4	4	8	40	46.973	53013000	53013000	0	44458000	20080000	24378000	62666000	62666000	0	484540000	110380000	374160000
sp|P15034|AMPP_ECOLI Xaa-Pro aminopeptidase OS=Escherichia coli (strain K12) OX=83333 GN=pepP PE=1 SV=2	P15034	Xaa-Pro aminopeptidase	pepP			0.44518	30.8045						7	9	11	8	7	9	11	8	29.5	49.815	305170000	241010000	64158000	238830000	175740000	63085000	207240000	128180000	79052000	0	0	0
sp|P15038|HELD_ECOLI DNA helicase IV OS=Escherichia coli (strain K12) OX=83333 GN=helD PE=1 SV=2	P15038	Helicase IV	helD	0.4499	31.0297	0.50388	33.5053	0.56071	35.9266				10	5	5	4	10	5	5	4	19.3	77.975	495750000	361610000	134140000	268310000	171080000	97235000	317030000	227860000	89178000	123340000	0	123340000
sp|P15042|DNLJ_ECOLI DNA ligase OS=Escherichia coli (strain K12) OX=83333 GN=ligA PE=1 SV=2;sp|B1XA82|DNLJ_ECODH DNA ligase OS=Escherichia coli (strain K12 / DH10B) OX=316385 GN=ligA PE=3 SV=1	P15042	DNA ligase	ligA	0.58409	36.8723	0.48739	32.7681	0.45275	31.165	2.7829	73.5653		7	4	5	8	7	4	5	8	25	73.605	234950000	133090000	101860000	165920000	118040000	47886000	127250000	75911000	51335000	308550000	33798000	274750000
sp|P15047|ENTA_ECOLI 2,3-dihydro-2,3-dihydroxybenzoate dehydrogenase OS=Escherichia coli (strain K12) OX=83333 GN=entA PE=1 SV=1	P15047	2,3-dihydro-2,3-dihydroxybenzoate dehydrogenase	entA							3.3789	77.1632		13	11	13	14	13	11	13	14	52.8	26.249	1657700000	1657700000	0	890020000	890020000	0	1425500000	1417500000	7947200	2680000000	621000000	2059000000
sp|P15067|GLGX_ECOLI Glycogen debranching enzyme OS=Escherichia coli (strain K12) OX=83333 GN=glgX PE=1 SV=3;sp|C4ZVY1|GLGX_ECOBW Glycogen debranching enzyme OS=Escherichia coli (strain K12 / MC4100 / BW2952) OX=595496 GN=glgX PE=3 SV=1;sp|B1X776|GLGX_ECOD	P15067	Glycogen debranching enzyme	glgX							2.7357	73.2313					4	1	1	0	4	10.5	73.576	14663000	14663000	0	29135000	15408000	13728000	0	0	0	136420000	29155000	107270000
sp|P15078|CSTA_ECOLI Peptide transporter CstA OS=Escherichia coli (strain K12) OX=83333 GN=cstA PE=1 SV=3	P15078	Carbon starvation protein A	cstA	0.62768	38.5629	0.34443	25.619	0.3416	25.4621				2	2	2		2	2	2	1	4.6	75.104	561450000	361360000	200090000	482740000	306810000	175930000	525620000	266550000	259070000	72520000	27167000	45353000
sp|P15254|PUR4_ECOLI Phosphoribosylformylglycinamidine synthase OS=Escherichia coli (strain K12) OX=83333 GN=purL PE=1 SV=3	P15254	Phosphoribosylformylglycinamidine synthase	purL	0.39194	28.1578	0.43888	30.5015	0.45346	31.1987	2.378	70.3967		40	39	39	40	40	39	39	40	54.7	141.4	7004300000	4723300000	2281000000	7242000000	4881800000	2360200000	8898500000	5895800000	3002700000	8522800000	2331800000	6190900000
sp|P15288|PEPD_ECOLI Cytosol non-specific dipeptidase OS=Escherichia coli (strain K12) OX=83333 GN=pepD PE=1 SV=3	P15288	Cytosol non-specific dipeptidase	pepD	0.45884	31.4524	0.45753	31.3908	0.44047	30.5782	3.0495	75.3056		16	15	17	19	16	15	17	19	52.4	52.915	2621300000	1885000000	736280000	3144900000	2194200000	950750000	3043800000	2107500000	936240000	7266700000	1810900000	5455800000
sp|P15373|PRLF_ECOLI Antitoxin PrlF OS=Escherichia coli (strain K12) OX=83333 GN=prlF PE=1 SV=1	P15373	Antitoxin PrlF	prlF													2	0	0	0	2	24.3	12.359	0	0	0	0	0	0	0	0	0	107200000	0	107200000
sp|P15639|PUR9_ECOLI Bifunctional purine biosynthesis protein PurH OS=Escherichia coli (strain K12) OX=83333 GN=purH PE=1 SV=1;sp|C5A0U7|PUR9_ECOBW Bifunctional purine biosynthesis protein PurH OS=Escherichia coli (strain K12 / MC4100 / BW2952) OX=595496 G	P15639	Bifunctional purine biosynthesis protein PurH;Phosphoribosylaminoimidazolecarboxamide formyltransferase;IMP cyclohydrolase	purH	0.45421	31.2341	0.48447	32.6359	0.49494	33.1077	2.2056	68.8046		23	21	24	24	23	21	24	24	67.3	57.329	4282200000	2939500000	1342700000	3849400000	2435100000	1414300000	4900000000	3185200000	1714800000	5987400000	1832600000	4154800000
sp|P15640|PUR2_ECOLI Phosphoribosylamine--glycine ligase OS=Escherichia coli (strain K12) OX=83333 GN=purD PE=1 SV=2	P15640	Phosphoribosylamine--glycine ligase	purD	0.38201	27.6416	0.48421	32.6241	0.48832	32.8101	2.2468	69.2004		9	11	10	14	9	11	10	14	42.7	45.94	1031200000	700760000	330450000	1277100000	856350000	420740000	1346200000	933980000	412240000	3167800000	924930000	2242900000
sp|P15723|DGTP_ECOLI Deoxyguanosinetriphosphate triphosphohydrolase OS=Escherichia coli (strain K12) OX=83333 GN=dgt PE=1 SV=4;sp|C4ZRQ3|DGTP_ECOBW Deoxyguanosinetriphosphate triphosphohydrolase OS=Escherichia coli (strain K12 / MC4100 / BW2952) OX=595496	P15723	Deoxyguanosinetriphosphate triphosphohydrolase	dgt												2	2	0	0	2	2	7.1	59.382	0	0	0	0	0	0	0	0	0	0	0	0
sp|P15770|AROE_ECOLI Shikimate dehydrogenase (NADP(+)) OS=Escherichia coli (strain K12) OX=83333 GN=aroE PE=1 SV=1;sp|C4ZUD6|AROE_ECOBW Shikimate dehydrogenase (NADP(+)) OS=Escherichia coli (strain K12 / MC4100 / BW2952) OX=595496 GN=aroE PE=3 SV=1;sp|B1X6	P15770	Shikimate dehydrogenase (NADP(+))	aroE										2	2	2	4	2	2	2	4	20.2	29.413	0	0	0	0	0	0	0	0	0	57568000	19198000	38370000
sp|P15877|DHG_ECOLI Quinoprotein glucose dehydrogenase OS=Escherichia coli (strain K12) OX=83333 GN=gcd PE=1 SV=3	P15877	Quinoprotein glucose dehydrogenase	gcd	0.42921	30.0313	0.44092	30.5999	0.40507	28.8292	3.114	75.6928		26	28	29	20	26	28	29	20	50.4	86.746	12074000000	8550500000	3523000000	11775000000	8483400000	3291600000	13043000000	9459700000	3582900000	4176400000	681260000	3495100000
sp|P15977|MALQ_ECOLI 4-alpha-glucanotransferase OS=Escherichia coli (strain K12) OX=83333 GN=malQ PE=1 SV=2	P15977	4-alpha-glucanotransferase	malQ	0.45061	31.0635	0.4438	30.7383	0.41307	29.2321	2.2987	69.685		16	17	14	11	16	17	14	11	34.1	78.503	1035500000	734700000	300770000	838620000	507350000	331270000	936560000	684700000	251860000	385370000	82869000	302500000
sp|P15993|AROP_ECOLI Aromatic amino acid transport protein AroP OS=Escherichia coli (strain K12) OX=83333 GN=aroP PE=1 SV=3	P15993	Aromatic amino acid transport protein AroP	aroP	0.27875	21.7986	0.34108	25.4332			2.5104	71.5132		2	2		2	2	2	1	2	5.3	49.69	1531700000	1163000000	368710000	1748200000	1330800000	417380000	2035900000	1529700000	506230000	501270000	139920000	361360000
sp|P16095|SDHL_ECOLI L-serine dehydratase 1 OS=Escherichia coli (strain K12) OX=83333 GN=sdaA PE=1 SV=3	P16095	L-serine dehydratase 1	sdaA	1.626	61.9193								3	3	4		3	3	4	0	17.6	48.906	458940000	92752000	366190000	145240000	0	145240000	206480000	31483000	175000000	0	0	0
sp|P16384|MIAA_ECOLI tRNA dimethylallyltransferase OS=Escherichia coli (strain K12) OX=83333 GN=miaA PE=1 SV=2;sp|C4ZR48|MIAA_ECOBW tRNA dimethylallyltransferase OS=Escherichia coli (strain K12 / MC4100 / BW2952) OX=595496 GN=miaA PE=3 SV=1;sp|B1XDS2|MIAA_	P16384	tRNA dimethylallyltransferase	miaA													4	1	0	1	4	28.8	35.065	0	0	0	0	0	0	0	0	0	30021000	13912000	16109000
sp|P16456|SELD_ECOLI Selenide, water dikinase OS=Escherichia coli (strain K12) OX=83333 GN=selD PE=1 SV=1	P16456	Selenide, water dikinase	selD	0.48496	32.6581	0.5288	34.5892	0.52318	34.3479	2.6145	72.3337		15	13	11	10	15	13	11	10	67.7	36.687	4307500000	2841400000	1466100000	2705700000	1621000000	1084600000	2585000000	1588400000	996610000	1792600000	434750000	1357800000
sp|P16659|SYP_ECOLI Proline--tRNA ligase OS=Escherichia coli (strain K12) OX=83333 GN=proS PE=1 SV=4;sp|C4ZRT7|SYP_ECOBW Proline--tRNA ligase OS=Escherichia coli (strain K12 / MC4100 / BW2952) OX=595496 GN=proS PE=3 SV=1;sp|B1XD64|SYP_ECODH Proline--tRNA l	P16659	Proline--tRNA ligase	proS	0.45609	31.3229	0.48941	32.8593	0.49593	33.152	2.4965	71.4		21	22	21	24	21	22	21	24	55.4	63.692	10140000000	6976300000	3163700000	8022800000	5248200000	2774600000	7998700000	5358600000	2640000000	10279000000	2708900000	7569800000
sp|P16676|CYSA_ECOLI Sulfate/thiosulfate import ATP-binding protein CysA OS=Escherichia coli (strain K12) OX=83333 GN=cysA PE=1 SV=2	P16676	Sulfate/thiosulfate import ATP-binding protein CysA	cysA	0.77227	43.5752	0.86337	46.3338	0.95914	48.9572	3.4533	77.5447		9	9	10	4	9	9	10	4	42.7	41.058	4130000000	2301000000	1829000000	4761300000	2561600000	2199700000	4247600000	2167400000	2080200000	346720000	86853000	259870000
sp|P16681|PHNB_ECOLI Protein PhnB OS=Escherichia coli (strain K12) OX=83333 GN=phnB PE=4 SV=1	P16681	Protein PhnB	phnB													5	0	0	0	5	47.6	16.171	0	0	0	0	0	0	0	0	0	262070000	43145000	218920000
sp|P16700|CYSP_ECOLI Thiosulfate-binding protein OS=Escherichia coli (strain K12) OX=83333 GN=cysP PE=1 SV=1	P16700	Thiosulfate-binding protein	cysP	0.42365	29.758	0.44061	30.585	0.47099	32.0186	1.9328	65.9029		18	17	18	19	18	17	18	19	63.3	37.614	5599900000	3904300000	1695600000	4462200000	3296600000	1165500000	5471000000	3813500000	1657400000	3848200000	1339500000	2508700000
sp|P16701|CYST_ECOLI Sulfate transport system permease protein CysT OS=Escherichia coli (strain K12) OX=83333 GN=cysU PE=3 SV=1	P16701	Sulfate transport system permease protein CysT	cysU										2	2	2		2	2	2	0	18.4	30.291	0	0	0	0	0	0	0	0	0	0	0	0
sp|P16703|CYSM_ECOLI Cysteine synthase B OS=Escherichia coli (strain K12) OX=83333 GN=cysM PE=1 SV=1	P16703	Cysteine synthase B	cysM	0.41064	29.1102	0.55242	35.5844	0.52814	34.561	1.9573	66.1854		8	7	9	9	8	7	9	9	61.4	32.664	371190000	255230000	115960000	261470000	202920000	58550000	295000000	197390000	97607000	901690000	309570000	592120000
sp|P16869|FHUE_ECOLI FhuE receptor OS=Escherichia coli (strain K12) OX=83333 GN=fhuE PE=1 SV=2	P16869	FhuE receptor	fhuE			0.022083	2.16059	0.058989	5.57031	3.2803	76.6372		21	21	23	22	21	21	23	22	55.3	81.232	2886800000	2866300000	20482000	3440500000	3372000000	68550000	3561300000	3513700000	47574000	3267100000	665610000	2601500000
sp|P16926|MREC_ECOLI Cell shape-determining protein MreC OS=Escherichia coli (strain K12) OX=83333 GN=mreC PE=1 SV=1	P16926	Cell shape-determining protein MreC	mreC	0.40502	28.8266	0.47958	32.4133	0.49963	33.3169	3.0201	75.125		11	10	13	9	11	10	13	9	69.5	39.53	909490000	633800000	275690000	746920000	531250000	215670000	1008500000	617490000	390980000	291760000	36540000	255220000
sp|P17117|NFSA_ECOLI Oxygen-insensitive NADPH nitroreductase OS=Escherichia coli (strain K12) OX=83333 GN=nfsA PE=1 SV=2	P17117	Oxygen-insensitive NADPH nitroreductase	nfsA							2.0588	67.3074		2	2	2	7	2	2	2	7	52.1	26.8	163060000	135700000	27357000	178890000	148060000	30832000	139360000	101030000	38332000	10599000000	4344800000	6254500000
sp|P17169|GLMS_ECOLI Glutamine--fructose-6-phosphate aminotransferase [isomerizing] OS=Escherichia coli (strain K12) OX=83333 GN=glmS PE=1 SV=4	P17169	Glutamine--fructose-6-phosphate aminotransferase [isomerizing]	glmS	0.2837	22.1002	0.33331	24.9987	0.32662	24.6205	2.009	66.7664		13	12	12	18	13	12	12	18	50.2	66.894	2147700000	1638200000	509520000	2193200000	1779600000	413520000	1361100000	944740000	416400000	3080700000	822420000	2258300000
sp|P17315|CIRA_ECOLI Colicin I receptor OS=Escherichia coli (strain K12) OX=83333 GN=cirA PE=1 SV=2	P17315	Colicin I receptor	cirA	0.008664	0.858958	0.011408	1.12793	0.014762	1.45473	2.63	72.4518		45	49	48	42	45	49	48	42	81.6	73.895	77997000000	77794000000	203040000	77187000000	76565000000	621350000	85739000000	84915000000	823590000	52583000000	13540000000	39043000000
sp|P17443|MURG_ECOLI UDP-N-acetylglucosamine--N-acetylmuramyl-(pentapeptide) pyrophosphoryl-undecaprenol N-acetylglucosamine transferase OS=Escherichia coli (strain K12) OX=83333 GN=murG PE=1 SV=3;sp|C4ZRI5|MURG_ECOBW UDP-N-acetylglucosamine--N-acetylmuram	P17443	UDP-N-acetylglucosamine--N-acetylmuramyl-(pentapeptide) pyrophosphoryl-undecaprenol N-acetylglucosamine transferase	murG	0.43001	30.0704	0.42544	29.8462	0.49032	32.9003				10	11	9	6	10	11	9	6	57.2	37.814	2124100000	1577800000	546320000	1847200000	1281200000	566030000	2041600000	1402300000	639300000	22324000	0	22324000
sp|P17445|BETB_ECOLI NAD/NADP-dependent betaine aldehyde dehydrogenase OS=Escherichia coli (strain K12) OX=83333 GN=betB PE=1 SV=3;sp|B1XET7|BETB_ECODH NAD/NADP-dependent betaine aldehyde dehydrogenase OS=Escherichia coli (strain K12 / DH10B) OX=316385 GN=	P17445	NAD/NADP-dependent betaine aldehyde dehydrogenase	betB										2	2		9	2	2	1	9	30.8	52.911	117530000	76844000	40681000	88869000	88869000	0	91341000	91341000	0	377100000	18763000	358340000
[truncated: 800 more rows]

## Sheet: label-free quantification
Fasta headers	Uniprot ID	Protein names	Gene names	p-value rec1/amp	protein ratio rec1/amp (log2)	p>0.05 & FC>2 rec1/amp	p-value rec1.5/amp	protein ratio rec1.5/amp (log2)	p>0.05 & FC>2 rec1.5/amp		LFQ intensity rec1_1	LFQ intensity rec1_2	LFQ intensity rec1_3	LFQ intensity rec1.5_1	LFQ intensity rec1.5_2	LFQ intensity rec1.5_3	Peptides rec1_1	Peptides rec1_2	Peptides rec1_3	Peptides rec1.5_1	Peptides rec1.5_2	Peptides rec1.5_3	Unique peptides rec1_1	Unique peptides rec1_2	Unique peptides rec1_3	Unique peptides rec1.5_1	Unique peptides rec1.5_2	Unique peptides rec1.5_3	Sequence coverage [%]	Mol. weight [kDa]	Intensity rec1_1	Intensity rec1_2	Intensity rec1_3	Intensity rec1.5_1	Intensity rec1.5_2	Intensity rec1.5_3
[truncated: 2,179 more rows]
